# Supplementary material for: Functional analysis of TLK2 variants and their proximal interactomes implicates impaired kinase activity and chromatin maintenance defects in their pathogenesis
Source: HighWire-hosted journal article supplement (doi:10.1136/jmedgenet-2020-107281), 2020-12-15
Supplement: jmedgenet-2020-107281supp006_data_supplement.xlsx [file jmedgenet-2020-107281supp006_data_supplement.xlsx]

## Sheet: 1. Results table
Table S8		TLK2-WT							TLK2-D551G (D529G iso2)							TLK2-S617L (S595L iso2)
PreyGene	Prey	SpecSum	AvgSpec	ContSum	ContAvg	FoldChange	SaintScore	BFDR	SpecSum	AvgSpec	ContSum	ContAvg	FoldChange	SaintScore	BFDR	SpecSum	AvgSpec	ContSum	ContAvg	FoldChange	SaintScore	BFDR
AAAS	Q9NRG9	1	0.11	43	0.955556	0.12	0	0.89
AAGAB	Q6PD74	1	0.11	11	0.244444	0.45	0	0.89
AAK1	Q2M2I8	46	5.11	309	6.86667	0.74	0	0.88	5	0.83	309	6.86667	0.12	0	0.89	16	2.67	309	6.86667	0.39	0	0.89
AAMDC	Q9H7C9	8	0.89	51	1.13333	0.78	0.02	0.77	1	0.17	51	1.13333	0.15	0	0.89	5	0.83	51	1.13333	0.74	0.01	0.79
AAMP	Q13685								1	0.17	1	0.0222222	1.67	0	0.89
AAR2	Q9Y312	21	2.33	103	2.28889	1.02	0	0.84	15	2.5	103	2.28889	1.09	0	0.84	18	3	103	2.28889	1.31	0.01	0.79
AARD	Q4LEZ3
AARS1	P49588	34	3.78	764	16.9778	0.22	0	0.89	8	1.33	764	16.9778	0.08	0	0.89	17	2.83	764	16.9778	0.17	0	0.89
AARS2	Q5JTZ9
AASDH	Q4L235	24	2.67	30	0.666667	4	0.29	0.43	16	2.67	30	0.666667	4	0.22	0.5	17	2.83	30	0.666667	4.25	0.25	0.47
AASDHPPT	Q9NRN7	47	5.22	379	8.42222	0.62	0	0.89	31	5.17	379	8.42222	0.61	0	0.89	44	7.33	379	8.42222	0.87	0	0.89
ABCB1	P08183
ABCB7	O75027	1	0.11	9	0.2	0.56	0	0.89
ABCD3	P28288	36	4	237	5.26667	0.76	0	0.88	3	0.5	237	5.26667	0.09	0	0.89	2	0.33	237	5.26667	0.06	0	0.89
ABCE1	P61221	8	0.89	298	6.62222	0.13	0	0.89	1	0.17	298	6.62222	0.03	0	0.89	1	0.17	298	6.62222	0.03	0	0.89
ABCF1	Q8NE71	95	10.56	731	16.2444	0.65	0	0.89	27	4.5	731	16.2444	0.28	0	0.89	39	6.5	731	16.2444	0.4	0	0.89
ABCF2	Q9UG63	18	2	128	2.84444	0.7	0	0.85								4	0.67	128	2.84444	0.23	0	0.89
ABCF3	Q9NUQ8	2	0.22	70	1.55556	0.14	0	0.89								1	0.17	70	1.55556	0.11	0	0.89
ABHD5	Q8WTS1	5	0.56	4	0.0888889	5.56	0	0.89	1	0.17	4	0.0888889	1.67	0	0.89	3	0.5	4	0.0888889	5	0	0.89
ABI1	Q8IZP0	13	1.44	174	3.86667	0.37	0	0.89	3	0.5	174	3.86667	0.13	0	0.89	1	0.17	174	3.86667	0.04	0	0.89
ABI2	Q9NYB9	3	0.33	33	0.733333	0.45	0	0.89
ABL1	P00519	2	0.22	10	0.222222	1	0	0.89
ABL2	P42684	11	1.22	128	2.84444	0.43	0	0.87	5	0.83	128	2.84444	0.29	0	0.89	4	0.67	128	2.84444	0.23	0	0.89
ABLIM1	O14639	34	3.78	291	6.46667	0.58	0	0.88	2	0.33	291	6.46667	0.05	0	0.89	13	2.17	291	6.46667	0.34	0	0.89
ABR	Q12979	17	1.89	71	1.57778	1.2	0.01	0.79	1	0.17	71	1.57778	0.11	0	0.89	1	0.17	71	1.57778	0.11	0	0.89
ABRACL	Q9P1F3
ABRAXAS1	Q6UWZ7	1	0.11	0	0	1.11	0	0.89	1	0.17	0	0	1.67	0	0.89
ABRAXAS2	Q15018	9	1	44	0.977778	1.02	0	0.83	2	0.33	44	0.977778	0.34	0	0.89	4	0.67	44	0.977778	0.68	0	0.82
ABT1	Q9ULW3	8	0.89	5	0.111111	8	0.18	0.53	14	2.33	5	0.111111	21	0.57	0.2	14	2.33	5	0.111111	21	0.48	0.26
ACAA1	P09110															1	0.17	3	0.0666667	1.67	0	0.89
ACACA	Q13085	2836	315.11	18723	416.067	0.76	0	0.89	1909	318.17	18723	416.067	0.76	0	0.89	597	99.5	18723	416.067	0.24	0	0.89
ACACB	O00763	218	24.22	2198	48.8444	0.5	0	0.89	99	16.5	2198	48.8444	0.34	0	0.89	7	1.17	2198	48.8444	0.02	0	0.89
ACAP2	Q15057	2	0.22	92	2.04444	0.11	0	0.89								1	0.17	92	2.04444	0.08	0	0.89
ACAT1	P24752	5	0.56	20	0.444444	1.25	0.02	0.77	7	1.17	20	0.444444	2.63	0.08	0.67	1	0.17	20	0.444444	0.38	0	0.89
ACAT2	Q9BWD1	2	0.22	27	0.6	0.37	0	0.89
ACBD3	Q9H3P7	20	2.22	185	4.11111	0.54	0	0.89	8	1.33	185	4.11111	0.32	0	0.89	12	2	185	4.11111	0.49	0	0.89
ACBD6	Q9BR61	3	0.33	29	0.644444	0.52	0	0.89								6	1	29	0.644444	1.55	0.02	0.78
ACIN1	Q9UKV3	91	10.11	212	4.71111	2.15	0.1	0.64	91	15.17	212	4.71111	3.22	0.33	0.38	55	9.17	212	4.71111	1.95	0.03	0.75
ACLY	P53396	39	4.33	1190	26.4444	0.16	0	0.89	30	5	1190	26.4444	0.19	0	0.89	16	2.67	1190	26.4444	0.1	0	0.89
ACO1	P21399
ACO2	Q99798								3	0.5	19	0.422222	1.18	0.04	0.72	3	0.5	19	0.422222	1.18	0.04	0.72
ACOT2	P49753	1	0.11	2	0.0444444	1.11	0	0.89
ACOT7	O00154								3	0.5	66	1.46667	0.34	0	0.89
ACOT9	Q9Y305	59	6.56	345	7.66667	0.86	0	0.88	37	6.17	345	7.66667	0.8	0	0.88	53	8.83	345	7.66667	1.15	0	0.88
ACP1	P24666	36	4	123	2.73333	1.46	0	0.82	19	3.17	123	2.73333	1.16	0	0.85	27	4.5	123	2.73333	1.65	0	0.82
ACSL3	O95573	1	0.11	146	3.24444	0.03	0	0.89	2	0.33	146	3.24444	0.1	0	0.89	3	0.5	146	3.24444	0.15	0	0.89
ACSS2	Q9NR19	6	0.67	22	0.488889	1.36	0.03	0.74	3	0.5	22	0.488889	1.02	0	0.89	6	1	22	0.488889	2.05	0.03	0.75
ACTB	P60709	140	15.56	774	17.2	0.9	0	0.89	91	15.17	774	17.2	0.88	0	0.89	76	12.67	774	17.2	0.74	0	0.89
ACTBL2	Q562R1	8	0.89	46	1.02222	0.87	0	0.83	2	0.33	46	1.02222	0.33	0	0.89	5	0.83	46	1.02222	0.82	0	0.82
ACTC1	P68032	27	3	143	3.17778	0.94	0	0.85	23	3.83	143	3.17778	1.21	0	0.85	21	3.5	143	3.17778	1.1	0	0.86
ACTG1	P63261
ACTL6A	O96019	49	5.44	126	2.8	1.94	0.02	0.77	50	8.33	126	2.8	2.98	0.2	0.51	19	3.17	126	2.8	1.13	0	0.85
ACTN1	P12814	3	0.33	69	1.53333	0.22	0	0.89	1	0.17	69	1.53333	0.11	0	0.89
ACTN4	O43707	11	1.22	157	3.48889	0.35	0	0.89	2	0.33	157	3.48889	0.1	0	0.89	2	0.33	157	3.48889	0.1	0	0.89
ACTR10	Q9NZ32
ACTR1A	P61163	25	2.78	127	2.82222	0.98	0	0.85	9	1.5	127	2.82222	0.53	0	0.87	8	1.33	127	2.82222	0.47	0	0.89
ACTR1B	P42025	2	0.22	20	0.444444	0.5	0	0.89	3	0.5	20	0.444444	1.12	0	0.89	2	0.33	20	0.444444	0.75	0	0.89
ACTR2	P61160	24	2.67	240	5.33333	0.5	0	0.87	2	0.33	240	5.33333	0.06	0	0.89	5	0.83	240	5.33333	0.16	0	0.89
ACTR3	P61158	13	1.44	313	6.95556	0.21	0	0.89	1	0.17	313	6.95556	0.02	0	0.89	3	0.5	313	6.95556	0.07	0	0.89
ACTR5	Q9H9F9	15	1.67	22	0.488889	3.41	0.18	0.53	16	2.67	22	0.488889	5.45	0.33	0.39	9	1.5	22	0.488889	3.07	0.14	0.57
ACTR6	Q9GZN1	8	0.89	3	0.0666667	8.89	0.28	0.43	3	0.5	3	0.0666667	5	0	0.89
ACTR8	Q9H981	12	1.33	20	0.444444	3	0.14	0.58	7	1.17	20	0.444444	2.63	0.16	0.55	6	1	20	0.444444	2.25	0.13	0.58
ACY1	Q03154
ACYP2	P14621	2	0.22	3	0.0666667	2.22	0	0.89	1	0.17	3	0.0666667	1.67	0	0.89	2	0.33	3	0.0666667	3.33	0	0.89
ADAMTS2	O95450								1	0.17	0	0	1.67	0	0.89
ADAR	P55265	124	13.78	683	15.1778	0.91	0	0.89	111	18.5	683	15.1778	1.22	0	0.89	91	15.17	683	15.1778	1	0	0.89
ADAT1	Q9BUB4	1	0.11	9	0.2	0.56	0	0.89	1	0.17	9	0.2	0.83	0	0.89
ADD1	P35611	50	5.56	330	7.33333	0.76	0	0.89	28	4.67	330	7.33333	0.64	0	0.89	22	3.67	330	7.33333	0.5	0	0.89
ADD2	P35612	9	1	132	2.93333	0.34	0	0.87	2	0.33	132	2.93333	0.11	0	0.89	1	0.17	132	2.93333	0.06	0	0.89
ADD3	Q9UEY8	27	3	190	4.22222	0.71	0	0.87	4	0.67	190	4.22222	0.16	0	0.89	8	1.33	190	4.22222	0.32	0	0.89
ADGRD2	Q7Z7M1	1	0.11	0	0	1.11	0	0.89	1	0.17	0	0	1.67	0	0.89
ADGRG4	Q8IZF6	3	0.33	8	0.177778	1.87	0	0.89	1	0.17	8	0.177778	0.94	0	0.89	1	0.17	8	0.177778	0.94	0	0.89
ADH5	P11766	1	0.11	16	0.355556	0.31	0	0.89								3	0.5	16	0.355556	1.41	0.05	0.71
ADI1	Q9BV57															1	0.17	22	0.488889	0.34	0	0.89
ADK	P55263	2	0.22	15	0.333333	0.67	0	0.89
ADNP	Q9H2P0	185	20.56	310	6.88889	2.98	0.13	0.58	114	19	310	6.88889	2.76	0.07	0.68	84	14	310	6.88889	2.03	0	0.83
ADNP2	Q6IQ32	4	0.44	1	0.0222222	4.44	0	0.89	6	1	1	0.0222222	10	0.38	0.34	2	0.33	1	0.0222222	3.33	0	0.89
ADO	Q96SZ5	1	0.11	13	0.288889	0.38	0	0.89
ADPRS	Q9NX46
ADRM1	Q16186	5	0.56	41	0.911111	0.61	0.02	0.77	4	0.67	41	0.911111	0.73	0.01	0.79	4	0.67	41	0.911111	0.73	0.01	0.79
ADSL	P30566	36	4	159	3.53333	1.13	0.01	0.78	11	1.83	159	3.53333	0.52	0	0.89	10	1.67	159	3.53333	0.47	0	0.87
ADSS2	P30520	2	0.22	206	4.57778	0.05	0	0.89	1	0.17	206	4.57778	0.04	0	0.89	4	0.67	206	4.57778	0.15	0	0.89
AEBP2	Q6ZN18	1	0.11	3	0.0666667	1.11	0	0.89	2	0.33	3	0.0666667	3.33	0	0.89	4	0.67	3	0.0666667	6.67	0.14	0.58
AFDN	P55196	348	38.67	1369	30.4222	1.27	0	0.89	107	17.83	1369	30.4222	0.59	0	0.89	135	22.5	1369	30.4222	0.74	0	0.89
AFF1	P51825	3	0.33	0	0	3.33	0.09	0.66
AFF2	P51816	1	0.11	0	0	1.11	0	0.89	2	0.33	0	0	3.33	0	0.89
AFF4	Q9UHB7	98	10.89	213	4.73333	2.3	0.04	0.73	53	8.83	213	4.73333	1.87	0	0.83	38	6.33	213	4.73333	1.34	0	0.87
AFG3L2	Q9Y4W6
AFTPH	Q6ULP2								1	0.17	32	0.711111	0.23	0	0.89
AGAP3	Q96P47															1	0.17	30	0.666667	0.25	0	0.89
AGFG1	P52594	75	8.33	416	9.24444	0.9	0	0.89	41	6.83	416	9.24444	0.74	0	0.89	44	7.33	416	9.24444	0.79	0	0.89
AGFG2	O95081															2	0.33	12	0.266667	1.25	0	0.89
AGGF1	Q8N302	13	1.44	20	0.444444	3.25	0.12	0.62	8	1.33	20	0.444444	3	0.11	0.63	3	0.5	20	0.444444	1.12	0.03	0.75
AGK	Q53H12								2	0.33	8	0.177778	1.87	0	0.89
AGL	P35573															2	0.33	4	0.0888889	3.33	0.13	0.59
AGO1	Q9UL18
AGO2	Q9UKV8	9	1	232	5.15556	0.19	0	0.89	2	0.33	232	5.15556	0.06	0	0.89	3	0.5	232	5.15556	0.1	0	0.89
AGPAT1	Q99943								1	0.17	5	0.111111	1.5	0	0.89
AGPS	O00116								1	0.17	29	0.644444	0.26	0	0.89	1	0.17	29	0.644444	0.26	0	0.89
AGTPBP1	Q9UPW5	12	1.33	91	2.02222	0.66	0	0.89	2	0.33	91	2.02222	0.16	0	0.89	4	0.67	91	2.02222	0.33	0	0.89
AGTRAP	Q6RW13
AHCTF1	Q8WYP5	56	6.22	159	3.53333	1.76	0.05	0.71	43	7.17	159	3.53333	2.03	0.02	0.78	10	1.67	159	3.53333	0.47	0	0.89
AHCY	P23526	39	4.33	258	5.73333	0.76	0	0.88	45	7.5	258	5.73333	1.31	0	0.84	37	6.17	258	5.73333	1.08	0	0.87
AHCYL1	O43865	6	0.67	76	1.68889	0.39	0	0.86	3	0.5	76	1.68889	0.3	0	0.85	5	0.83	76	1.68889	0.49	0	0.84
AHCYL2	Q96HN2	5	0.56	32	0.711111	0.78	0	0.89								1	0.17	32	0.711111	0.23	0	0.89
AHDC1	Q5TGY3	1	0.11	0	0	1.11	0	0.89	1	0.17	0	0	1.67	0	0.89	1	0.17	0	0	1.67	0	0.89
AHNAK	Q09666	1640	182.22	10976	243.911	0.75	0	0.89	280	46.67	10976	243.911	0.19	0	0.89	221	36.83	10976	243.911	0.15	0	0.89
AHNAK2	Q8IVF2	2	0.22	7	0.155556	1.43	0	0.89
AHR	P35869								6	1	13	0.288889	3.46	0	0.89	11	1.83	13	0.288889	6.35	0.26	0.44
AHSA1	O95433	111	12.33	712	15.8222	0.78	0	0.89	73	12.17	712	15.8222	0.77	0	0.89	100	16.67	712	15.8222	1.05	0	0.89
AIF1L	Q9BQI0	14	1.56	237	5.26667	0.3	0	0.89	7	1.17	237	5.26667	0.22	0	0.89	8	1.33	237	5.26667	0.25	0	0.89
AIFM1	O95831	47	5.22	131	2.91111	1.79	0.09	0.66	31	5.17	131	2.91111	1.77	0.1	0.64	35	5.83	131	2.91111	2	0.26	0.46
AIMP1	Q12904	6	0.67	49	1.08889	0.61	0	0.83
AIMP2	Q13155	14	1.56	64	1.42222	1.09	0.04	0.73	2	0.33	64	1.42222	0.23	0	0.89	1	0.17	64	1.42222	0.12	0	0.89
AIP	O00170	15	1.67	183	4.06667	0.41	0	0.89	6	1	183	4.06667	0.25	0	0.89	13	2.17	183	4.06667	0.53	0	0.89
AK2	P54819	2	0.22	47	1.04444	0.21	0	0.89	1	0.17	47	1.04444	0.16	0	0.89
AKAP1	Q92667	1	0.11	381	8.46667	0.01	0	0.89
AKAP12	Q02952	42	4.67	799	17.7556	0.26	0	0.89	12	2	799	17.7556	0.11	0	0.89	5	0.83	799	17.7556	0.05	0	0.89
AKAP13	Q12802	1	0.11	42	0.933333	0.12	0	0.89								1	0.17	42	0.933333	0.18	0	0.89
AKAP17A	Q02040	8	0.89	2	0.0444444	8.89	0.17	0.54	6	1	2	0.0444444	10	0.29	0.42	1	0.17	2	0.0444444	1.67	0	0.89
AKAP2	Q9Y2D5	17	1.89	332	7.37778	0.26	0	0.89	9	1.5	332	7.37778	0.2	0	0.89	11	1.83	332	7.37778	0.25	0	0.89
AKAP5	P24588	1	0.11	9	0.2	0.56	0	0.89	3	0.5	9	0.2	2.5	0	0.89
AKAP8	O43823	21	2.33	75	1.66667	1.4	0.02	0.76	21	3.5	75	1.66667	2.1	0.04	0.72	17	2.83	75	1.66667	1.7	0.02	0.77
AKAP8L	Q9ULX6	22	2.44	79	1.75556	1.39	0.01	0.8	16	2.67	79	1.75556	1.52	0.01	0.79	9	1.5	79	1.75556	0.85	0	0.84
AKR7A2	O43488								1	0.17	38	0.844444	0.2	0	0.89	1	0.17	38	0.844444	0.2	0	0.89
AKT1S1	Q96B36	12	1.33	29	0.644444	2.07	0.09	0.65	2	0.33	29	0.644444	0.52	0	0.89	3	0.5	29	0.644444	0.78	0	0.89
ALDH18A1	P54886	14	1.56	167	3.71111	0.42	0	0.89	2	0.33	167	3.71111	0.09	0	0.89	5	0.83	167	3.71111	0.22	0	0.89
ALDH1B1	P30837
ALDH1L2	Q3SY69
ALDH3A2	P51648	6	0.67	54	1.2	0.56	0.01	0.81	1	0.17	54	1.2	0.14	0	0.89
ALDH7A1	P49419	15	1.67	46	1.02222	1.63	0.03	0.74	4	0.67	46	1.02222	0.65	0	0.89	7	1.17	46	1.02222	1.14	0.02	0.78
ALDOA	P04075	20	2.22	156	3.46667	0.64	0	0.86	14	2.33	156	3.46667	0.67	0	0.86	8	1.33	156	3.46667	0.38	0	0.89
ALDOC	P09972	4	0.44	45	1	0.44	0	0.89	6	1	45	1	1	0.02	0.78	5	0.83	45	1	0.83	0.01	0.81
ALG1	Q9BT22	2	0.22	6	0.133333	1.67	0	0.89	8	1.33	6	0.133333	10	0.38	0.35	4	0.67	6	0.133333	5	0.11	0.63
ALG13	Q9NP73	12	1.33	25	0.555556	2.4	0.14	0.58	7	1.17	25	0.555556	2.1	0.02	0.76	6	1	25	0.555556	1.8	0.02	0.76
ALG5	Q9Y673
ALK	Q9UM73	1	0.11	0	0	1.11	0	0.89
ALKBH2	Q6NS38								4	0.67	26	0.577778	1.15	0.04	0.73	6	1	26	0.577778	1.73	0.04	0.73
ALKBH3	Q96Q83	2	0.22	75	1.66667	0.13	0	0.89	2	0.33	75	1.66667	0.2	0	0.89	4	0.67	75	1.66667	0.4	0	0.85
ALKBH4	Q9NXW9
ALKBH5	Q6P6C2	12	1.33	96	2.13333	0.62	0	0.89	10	1.67	96	2.13333	0.78	0	0.85	14	2.33	96	2.13333	1.09	0	0.84
ALMS1	Q8TCU4	10	1.11	37	0.822222	1.35	0.03	0.74
ALX1	Q15699															3	0.5	0	0	5	0	0.89
ALX4	Q9H161	1	0.11	12	0.266667	0.42	0	0.89	4	0.67	12	0.266667	2.5	0	0.89	23	3.83	12	0.266667	14.38	0.82	0.06
ALYREF	Q86V81	30	3.33	165	3.66667	0.91	0	0.86	38	6.33	165	3.66667	1.73	0.01	0.81	29	4.83	165	3.66667	1.32	0	0.85
AMER1	Q5JTC6	1	0.11	7	0.155556	0.71	0	0.89	2	0.33	7	0.155556	2.14	0	0.89	2	0.33	7	0.155556	2.14	0	0.89
AMMECR1L	Q6DCA0	1	0.11	1	0.0222222	1.11	0	0.89	2	0.33	1	0.0222222	3.33	0	0.89
AMOT	Q4VCS5	1	0.11	4	0.0888889	1.11	0	0.89
AMOTL1	Q8IY63
AMOTL2	Q9Y2J4
AMPD2	Q01433	1	0.11	34	0.755556	0.15	0	0.89
AMZ2	Q86W34	4	0.44	18	0.4	1.11	0	0.89								1	0.17	18	0.4	0.42	0	0.89
ANAPC1	Q9H1A4	37	4.11	66	1.46667	2.8	0.13	0.58	30	5	66	1.46667	3.41	0.2	0.51	13	2.17	66	1.46667	1.48	0.03	0.74
ANAPC13	Q9BS18								1	0.17	6	0.133333	1.25	0	0.89	1	0.17	6	0.133333	1.25	0	0.89
ANAPC16	Q96DE5	5	0.56	12	0.266667	2.08	0.04	0.73	5	0.83	12	0.266667	3.12	0.06	0.7	5	0.83	12	0.266667	3.12	0	0.89
ANAPC4	Q9UJX5	16	1.78	27	0.6	2.96	0.15	0.56	18	3	27	0.6	5	0.32	0.39	7	1.17	27	0.6	1.94	0.03	0.74
ANAPC5	Q9UJX4	29	3.22	31	0.688889	4.68	0.32	0.39	16	2.67	31	0.688889	3.87	0.22	0.49	6	1	31	0.688889	1.45	0.03	0.75
ANAPC7	Q9UJX3	5	0.56	24	0.533333	1.04	0	0.89	3	0.5	24	0.533333	0.94	0	0.89
ANGEL2	Q5VTE6	1	0.11	10	0.222222	0.5	0	0.89	2	0.33	10	0.222222	1.5	0.06	0.69	1	0.17	10	0.222222	0.75	0	0.89
ANK2	Q01484	4	0.44	26	0.577778	0.77	0.01	0.79
ANK3	Q12955	81	9	325	7.22222	1.25	0	0.85	1	0.17	325	7.22222	0.02	0	0.89	4	0.67	325	7.22222	0.09	0	0.89
ANKAR	Q7Z5J8
ANKFY1	Q9P2R3	5	0.56	193	4.28889	0.13	0	0.89
ANKHD1	Q8IWZ3	51	5.67	219	4.86667	1.16	0	0.86	18	3	219	4.86667	0.62	0	0.88	26	4.33	219	4.86667	0.89	0	0.88
ANKLE2	Q86XL3
ANKRD11	Q6UB99	10	1.11	0	0	11.11	0.28	0.43	3	0.5	0	0	5	0.13	0.59	1	0.17	0	0	1.67	0	0.89
ANKRD17	O75179	84	9.33	257	5.71111	1.63	0	0.86	30	5	257	5.71111	0.88	0	0.88	33	5.5	257	5.71111	0.96	0	0.88
ANKRD28	O15084	12	1.33	32	0.711111	1.87	0.04	0.73								2	0.33	32	0.711111	0.47	0	0.89
ANKRD30A	Q9BXX3	1	0.11	1	0.0222222	1.11	0	0.89								2	0.33	1	0.0222222	3.33	0	0.89
ANKRD50	Q9ULJ7								1	0.17	22	0.488889	0.34	0	0.89
ANKRD52	Q8NB46
ANKS1A	Q92625	73	8.11	346	7.68889	1.05	0	0.87	6	1	346	7.68889	0.13	0	0.89	18	3	346	7.68889	0.39	0	0.89
ANLN	Q9NQW6	49	5.44	148	3.28889	1.66	0.02	0.78	50	8.33	148	3.28889	2.53	0.06	0.7	36	6	148	3.28889	1.82	0.01	0.8
ANO7	Q6IWH7
ANP32A	P39687	8	0.89	43	0.955556	0.93	0	0.89	5	0.83	43	0.955556	0.87	0	0.89	6	1	43	0.955556	1.05	0	0.89
ANP32B	Q92688	6	0.67	53	1.17778	0.57	0	0.83	5	0.83	53	1.17778	0.71	0.01	0.81	5	0.83	53	1.17778	0.71	0	0.89
ANP32E	Q9BTT0	22	2.44	56	1.24444	1.96	0.12	0.61	59	9.83	56	1.24444	7.9	0.57	0.2	76	12.67	56	1.24444	10.18	0.68	0.13
ANXA1	P04083	67	7.44	619	13.7556	0.54	0	0.89	38	6.33	619	13.7556	0.46	0	0.89	53	8.83	619	13.7556	0.64	0	0.89
ANXA2	P07355	98	10.89	2103	46.7333	0.23	0	0.89	27	4.5	2103	46.7333	0.1	0	0.89	62	10.33	2103	46.7333	0.22	0	0.89
ANXA4	P09525	6	0.67	61	1.35556	0.49	0.01	0.81
ANXA5	P08758	6	0.67	422	9.37778	0.07	0	0.89	9	1.5	422	9.37778	0.16	0	0.89	15	2.5	422	9.37778	0.27	0	0.89
ANXA6	P08133								2	0.33	277	6.15556	0.05	0	0.89	1	0.17	277	6.15556	0.03	0	0.89
AP1B1	Q10567	4	0.44	192	4.26667	0.1	0	0.89	5	0.83	192	4.26667	0.2	0	0.89	7	1.17	192	4.26667	0.27	0	0.89
AP1G1	O43747
AP1M1	Q9BXS5	2	0.22	76	1.68889	0.13	0	0.89								1	0.17	76	1.68889	0.1	0	0.89
AP1S2	P56377								1	0.17	6	0.133333	1.25	0	0.89
AP2A1	O95782	4	0.44	43	0.955556	0.47	0	0.89	3	0.5	43	0.955556	0.52	0	0.89	1	0.17	43	0.955556	0.17	0	0.89
AP2A2	O94973	5	0.56	70	1.55556	0.36	0	0.85								2	0.33	70	1.55556	0.21	0	0.89
AP2B1	P63010	18	2	246	5.46667	0.37	0	0.89	17	2.83	246	5.46667	0.52	0	0.89	12	2	246	5.46667	0.37	0	0.89
AP2M1	Q96CW1	6	0.67	86	1.91111	0.35	0	0.86	4	0.67	86	1.91111	0.35	0	0.89	4	0.67	86	1.91111	0.35	0	0.89
AP2S1	P53680	2	0.22	29	0.644444	0.34	0	0.89								1	0.17	29	0.644444	0.26	0	0.89
AP3B1	O00203	22	2.44	82	1.82222	1.34	0.01	0.8	1	0.17	82	1.82222	0.09	0	0.89	7	1.17	82	1.82222	0.64	0	0.85
AP3D1	O14617	48	5.33	378	8.4	0.63	0	0.89	11	1.83	378	8.4	0.22	0	0.89	11	1.83	378	8.4	0.22	0	0.89
AP3M1	Q9Y2T2	48	5.33	124	2.75556	1.94	0.03	0.75	55	9.17	124	2.75556	3.33	0.32	0.39	48	8	124	2.75556	2.9	0.12	0.62
AP3S1	Q92572	20	2.22	152	3.37778	0.66	0	0.87	8	1.33	152	3.37778	0.39	0	0.89	10	1.67	152	3.37778	0.49	0	0.89
AP4E1	Q9UPM8	1	0.11	6	0.133333	0.83	0	0.89
AP4S1	Q9Y587	1	0.11	2	0.0444444	1.11	0	0.89
APBB1	O00213	24	2.67	166	3.68889	0.72	0	0.88	33	5.5	166	3.68889	1.49	0	0.82	13	2.17	166	3.68889	0.59	0	0.87
APC	P25054
APEX1	P27695	6	0.67	101	2.24444	0.3	0	0.86								9	1.5	101	2.24444	0.67	0	0.86
API5	Q9BZZ5	54	6	211	4.68889	1.28	0	0.83	39	6.5	211	4.68889	1.39	0	0.86	50	8.33	211	4.68889	1.78	0	0.83
APIP	Q96GX9	1	0.11	4	0.0888889	1.11	0	0.89	1	0.17	4	0.0888889	1.67	0	0.89
APMAP	Q9HDC9
APOBEC3C	Q9NRW3	2	0.22	8	0.177778	1.25	0	0.89								1	0.17	8	0.177778	0.94	0	0.89
APOL2	Q9BQE5															1	0.17	2	0.0444444	1.67	0	0.89
APPL1	Q9UKG1	1	0.11	52	1.15556	0.1	0	0.89
APPL2	Q8NEU8	1	0.11	27	0.6	0.19	0	0.89
APRT	P07741								2	0.33	22	0.488889	0.68	0	0.89	2	0.33	22	0.488889	0.68	0	0.89
APTX	Q7Z2E3	3	0.33	1	0.0222222	3.33	0	0.89	3	0.5	1	0.0222222	5	0	0.89	3	0.5	1	0.0222222	5	0	0.89
AQR	O60306	52	5.78	15	0.333333	17.33	0.98	0.01	69	11.5	15	0.333333	34.5	1	0	18	3	15	0.333333	9	0.63	0.16
ARAF	P10398								1	0.17	9	0.2	0.83	0	0.89
ARAP1	Q96P48	4	0.44	50	1.11111	0.4	0	0.83	1	0.17	50	1.11111	0.15	0	0.89	1	0.17	50	1.11111	0.15	0	0.89
ARCN1	P48444	73	8.11	600	13.3333	0.61	0	0.89	30	5	600	13.3333	0.38	0	0.89	39	6.5	600	13.3333	0.49	0	0.89
ARF1	P84077	10	1.11	94	2.08889	0.53	0	0.89								1	0.17	94	2.08889	0.08	0	0.89
ARF3	P61204	18	2	119	2.64444	0.76	0	0.86	1	0.17	119	2.64444	0.06	0	0.89	5	0.83	119	2.64444	0.32	0	0.89
ARF4	P18085	31	3.44	112	2.48889	1.38	0.01	0.8	16	2.67	112	2.48889	1.07	0	0.83	18	3	112	2.48889	1.21	0	0.84
ARF5	P84085	7	0.78	52	1.15556	0.67	0	0.82	2	0.33	52	1.15556	0.29	0	0.89	1	0.17	52	1.15556	0.14	0	0.89
ARF6	P62330	10	1.11	63	1.4	0.79	0	0.82								5	0.83	63	1.4	0.6	0	0.83
ARFGAP1	Q8N6T3	38	4.22	315	7	0.6	0	0.88	32	5.33	315	7	0.76	0	0.88	49	8.17	315	7	1.17	0	0.88
ARFGAP2	Q8N6H7	25	2.78	263	5.84444	0.48	0	0.88	3	0.5	263	5.84444	0.09	0	0.89	10	1.67	263	5.84444	0.29	0	0.89
ARFGAP3	Q9NP61	5	0.56	140	3.11111	0.18	0	0.89	2	0.33	140	3.11111	0.11	0	0.89	6	1	140	3.11111	0.32	0	0.89
ARFGEF3	Q5TH69
ARFIP1	P53367	6	0.67	141	3.13333	0.21	0	0.89	4	0.67	141	3.13333	0.21	0	0.89	4	0.67	141	3.13333	0.21	0	0.89
ARFIP2	P53365	1	0.11	187	4.15556	0.03	0	0.89	1	0.17	187	4.15556	0.04	0	0.89
ARGLU1	Q9NWB6	2	0.22	17	0.377778	0.59	0	0.89	1	0.17	17	0.377778	0.44	0	0.89	1	0.17	17	0.377778	0.44	0	0.89
ARHGAP1	Q07960	5	0.56	232	5.15556	0.11	0	0.89								1	0.17	232	5.15556	0.03	0	0.89
ARHGAP12	Q8IWW6	3	0.33	199	4.42222	0.08	0	0.89								3	0.5	199	4.42222	0.11	0	0.89
ARHGAP17	Q68EM7	2	0.22	78	1.73333	0.13	0	0.89	3	0.5	78	1.73333	0.29	0	0.89
ARHGAP18	Q8N392	3	0.33	29	0.644444	0.52	0	0.89
ARHGAP21	Q5T5U3	26	2.89	190	4.22222	0.68	0	0.89	8	1.33	190	4.22222	0.32	0	0.89	11	1.83	190	4.22222	0.43	0	0.89
ARHGAP27	Q6ZUM4								1	0.17	32	0.711111	0.23	0	0.89	2	0.33	32	0.711111	0.47	0	0.89
ARHGAP32	A7KAX9	1	0.11	18	0.4	0.28	0	0.89
ARHGAP35	Q9NRY4	68	7.56	494	10.9778	0.69	0	0.89	28	4.67	494	10.9778	0.43	0	0.89	33	5.5	494	10.9778	0.5	0	0.89
ARHGAP5	Q13017	10	1.11	190	4.22222	0.26	0	0.89	2	0.33	190	4.22222	0.08	0	0.89	2	0.33	190	4.22222	0.08	0	0.89
ARHGAP9	Q9BRR9	5	0.56	7	0.155556	3.57	0.07	0.68	3	0.5	7	0.155556	3.21	0.1	0.64	1	0.17	7	0.155556	1.07	0	0.89
ARHGDIA	P52565	14	1.56	376	8.35556	0.19	0	0.89	10	1.67	376	8.35556	0.2	0	0.89	22	3.67	376	8.35556	0.44	0	0.89
ARHGEF10	O15013
ARHGEF11	O15085
ARHGEF12	Q9NZN5	2	0.22	46	1.02222	0.22	0	0.89	1	0.17	46	1.02222	0.16	0	0.89
ARHGEF16	Q5VV41	5	0.56	258	5.73333	0.1	0	0.89								2	0.33	258	5.73333	0.06	0	0.89
ARHGEF18	Q6ZSZ5	2	0.22	33	0.733333	0.3	0	0.89								1	0.17	33	0.733333	0.23	0	0.89
ARHGEF2	Q92974	3	0.33	80	1.77778	0.19	0	0.89	2	0.33	80	1.77778	0.19	0	0.89
ARHGEF40	Q8TER5															2	0.33	2	0.0444444	3.33	0	0.89
ARHGEF5	Q12774	2	0.22	55	1.22222	0.18	0	0.89								1	0.17	55	1.22222	0.14	0	0.89
ARHGEF7	Q14155	3	0.33	70	1.55556	0.21	0	0.89
ARID1A	O14497	55	6.11	144	3.2	1.91	0.05	0.72	40	6.67	144	3.2	2.08	0.08	0.67	20	3.33	144	3.2	1.04	0	0.83
ARID1B	Q8NFD5	14	1.56	32	0.711111	2.19	0.09	0.66	7	1.17	32	0.711111	1.64	0.02	0.76	4	0.67	32	0.711111	0.94	0.01	0.79
ARID2	Q68CP9	6	0.67	3	0.0666667	6.67	0.19	0.52	2	0.33	3	0.0666667	3.33	0	0.89	1	0.17	3	0.0666667	1.67	0	0.89
ARID3A	Q99856	61	6.78	63	1.4	4.84	0.62	0.17	60	10	63	1.4	7.14	0.89	0.03	39	6.5	63	1.4	4.64	0.52	0.23
ARID3B	Q8IVW6	112	12.44	106	2.35556	5.28	0.81	0.06	84	14	106	2.35556	5.94	0.94	0.01	64	10.67	106	2.35556	4.53	0.68	0.13
ARID4B	Q4LE39	21	2.33	15	0.333333	7	0.38	0.34	8	1.33	15	0.333333	4	0.08	0.66
ARIH2	O95376	1	0.11	10	0.222222	0.5	0	0.89	1	0.17	10	0.222222	0.75	0	0.89	1	0.17	10	0.222222	0.75	0	0.89
ARL1	P40616	20	2.22	124	2.75556	0.81	0	0.85	15	2.5	124	2.75556	0.91	0	0.86	12	2	124	2.75556	0.73	0	0.87
ARL13B	Q3SXY8
ARL14EP	Q8N8R7
ARL2	P36404	10	1.11	230	5.11111	0.22	0	0.89	20	3.33	230	5.11111	0.65	0	0.89	19	3.17	230	5.11111	0.62	0	0.89
ARL3	P36405	10	1.11	184	4.08889	0.27	0	0.89	7	1.17	184	4.08889	0.29	0	0.89	13	2.17	184	4.08889	0.53	0	0.89
ARL6IP4	Q66PJ3	10	1.11	56	1.24444	0.89	0	0.84	5	0.83	56	1.24444	0.67	0	0.89	10	1.67	56	1.24444	1.34	0.01	0.79
ARL6IP5	O75915
ARL8A	Q96BM9	1	0.11	4	0.0888889	1.11	0	0.89
ARMC6	Q6NXE6	1	0.11	13	0.288889	0.38	0	0.89
ARMC7	Q9H6L4	4	0.44	17	0.377778	1.18	0	0.89	4	0.67	17	0.377778	1.76	0.04	0.74	6	1	17	0.377778	2.65	0.11	0.64
ARMCX3	Q9UH62								2	0.33	0	0	3.33	0	0.89
ARNT	P27540	25	2.78	46	1.02222	2.72	0.11	0.63	52	8.67	46	1.02222	8.48	0.7	0.12	19	3.17	46	1.02222	3.1	0.21	0.51
ARNTL	O00327
ARPC1A	Q92747	5	0.56	180	4	0.14	0	0.89
ARPC1B	O15143	1	0.11	86	1.91111	0.06	0	0.89	1	0.17	86	1.91111	0.09	0	0.89
ARPC2	O15144	8	0.89	268	5.95556	0.15	0	0.89	1	0.17	268	5.95556	0.03	0	0.89
ARPC3	O15145	7	0.78	185	4.11111	0.19	0	0.89	1	0.17	185	4.11111	0.04	0	0.89
ARPC4	P59998	18	2	167	3.71111	0.54	0	0.89	1	0.17	167	3.71111	0.04	0	0.89	2	0.33	167	3.71111	0.09	0	0.89
ARPC5	O15511	2	0.22	89	1.97778	0.11	0	0.89
ARPC5L	Q9BPX5	1	0.11	13	0.288889	0.38	0	0.89
ARPIN	Q7Z6K5	83	9.22	224	4.97778	1.85	0.01	0.79	44	7.33	224	4.97778	1.47	0	0.87	58	9.67	224	4.97778	1.94	0	0.84
ARPP19	P56211	1	0.11	62	1.37778	0.08	0	0.89
ARRB2	P32121	9	1	57	1.26667	0.79	0	0.83	3	0.5	57	1.26667	0.39	0	0.89	3	0.5	57	1.26667	0.39	0	0.89
AS3MT	Q9HBK9	18	2	115	2.55556	0.78	0	0.82	14	2.33	115	2.55556	0.91	0	0.85	20	3.33	115	2.55556	1.3	0.01	0.8
ASAP1	Q9ULH1	3	0.33	68	1.51111	0.22	0	0.89								1	0.17	68	1.51111	0.11	0	0.89
ASAP2	O43150
ASCC1	Q8N9N2	3	0.33	33	0.733333	0.45	0	0.89								1	0.17	33	0.733333	0.23	0	0.89
ASCC2	Q9H1I8	16	1.78	108	2.4	0.74	0	0.84	3	0.5	108	2.4	0.21	0	0.89	3	0.5	108	2.4	0.21	0	0.89
ASCC3	Q8N3C0	53	5.89	377	8.37778	0.7	0	0.88	1	0.17	377	8.37778	0.02	0	0.89	1	0.17	377	8.37778	0.02	0	0.89
ASF1A	Q9Y294	73	8.11	25	0.555556	14.6	0.99	0	116	19.33	25	0.555556	34.8	1	0	66	11	25	0.555556	19.8	0.99	0
ASF1B	Q9NVP2	110	12.22	46	1.02222	11.96	1	0	155	25.83	46	1.02222	25.27	1	0	90	15	46	1.02222	14.67	1	0
ASH1L	Q9NR48	1	0.11	0	0	1.11	0	0.89
ASH2L	Q9UBL3	26	2.89	56	1.24444	2.32	0.11	0.63	19	3.17	56	1.24444	2.54	0.09	0.65	11	1.83	56	1.24444	1.47	0.02	0.77
ASNS	P08243	33	3.67	513	11.4	0.32	0	0.89	14	2.33	513	11.4	0.2	0	0.89	18	3	513	11.4	0.26	0	0.89
ASNSD1	Q9NWL6
ASPH	Q12797	1	0.11	2	0.0444444	1.11	0	0.89								1	0.17	2	0.0444444	1.67	0	0.89
ASPHD2	Q6ICH7	2	0.22	0	0	2.22	0	0.89	1	0.17	0	0	1.67	0	0.89
ASPSCR1	Q9BZE9	9	1	90	2	0.5	0	0.84	3	0.5	90	2	0.25	0	0.89	7	1.17	90	2	0.58	0	0.85
ASRGL1	Q7L266	8	0.89	27	0.6	1.48	0	0.89	6	1	27	0.6	1.67	0	0.89	6	1	27	0.6	1.67	0	0.89
ASS1	P00966	11	1.22	110	2.44444	0.5	0	0.84
ASXL1	Q8IXJ9
ASXL2	Q76L83	11	1.22	0	0	12.22	0.26	0.45	3	0.5	0	0	5	0.16	0.55
ATAD1	Q8NBU5								1	0.17	29	0.644444	0.26	0	0.89
ATAD2B	Q9ULI0	8	0.89	11	0.244444	3.64	0.04	0.73	5	0.83	11	0.244444	3.41	0.06	0.69	5	0.83	11	0.244444	3.41	0.12	0.62
ATAD3A	Q9NVI7	3	0.33	18	0.4	0.83	0.02	0.76
ATAD5	Q96QE3	16	1.78	29	0.644444	2.76	0.15	0.56	20	3.33	29	0.644444	5.17	0.4	0.32	12	2	29	0.644444	3.1	0.1	0.64
ATE1	O95260	5	0.56	228	5.06667	0.11	0	0.89	8	1.33	228	5.06667	0.26	0	0.89	11	1.83	228	5.06667	0.36	0	0.89
ATF1	P18846	19	2.11	24	0.533333	3.96	0.17	0.54	18	3	24	0.533333	5.62	0.36	0.36	15	2.5	24	0.533333	4.69	0.23	0.48
ATF2	P15336	5	0.56	13	0.288889	1.92	0.04	0.73	9	1.5	13	0.288889	5.19	0.32	0.39	5	0.83	13	0.288889	2.88	0.05	0.7
ATF3	P18847	18	2	30	0.666667	3	0.14	0.57	27	4.5	30	0.666667	6.75	0.53	0.22	35	5.83	30	0.666667	8.75	0.76	0.09
ATF7	P17544	2	0.22	20	0.444444	0.5	0	0.89	10	1.67	20	0.444444	3.75	0.21	0.5	12	2	20	0.444444	4.5	0.32	0.4
ATF7IP	Q6VMQ6	12	1.33	9	0.2	6.67	0.27	0.44	14	2.33	9	0.2	11.67	0.46	0.27	4	0.67	9	0.2	3.33	0.14	0.57
ATG101	Q9BSB4								1	0.17	19	0.422222	0.39	0	0.89	3	0.5	19	0.422222	1.18	0	0.89
ATG13	O75143	1	0.11	81	1.8	0.06	0	0.89	2	0.33	81	1.8	0.19	0	0.86	5	0.83	81	1.8	0.46	0	0.85
ATG14	Q6ZNE5	1	0.11	0	0	1.11	0	0.89
ATG2A	Q2TAZ0	1	0.11	41	0.911111	0.12	0	0.89								1	0.17	41	0.911111	0.18	0	0.89
ATG2B	Q96BY7	85	9.44	144	3.2	2.95	0.35	0.37	11	1.83	144	3.2	0.57	0	0.89	11	1.83	144	3.2	0.57	0	0.89
ATG3	Q9NT62	14	1.56	166	3.68889	0.42	0	0.87	1	0.17	166	3.68889	0.05	0	0.89	4	0.67	166	3.68889	0.18	0	0.89
ATG4A	Q8WYN0	2	0.22	43	0.955556	0.23	0	0.89	1	0.17	43	0.955556	0.17	0	0.89
ATG4C	Q96DT6								1	0.17	16	0.355556	0.47	0	0.89
ATG9A	Q7Z3C6								1	0.17	8	0.177778	0.94	0	0.89	2	0.33	8	0.177778	1.87	0	0.89
ATIC	P31939	3	0.33	85	1.88889	0.18	0	0.89	1	0.17	85	1.88889	0.09	0	0.89
ATM	Q13315	2	0.22	6	0.133333	1.67	0	0.89	3	0.5	6	0.133333	3.75	0	0.89
ATN1	P54259	1	0.11	8	0.177778	0.62	0	0.89
ATP1A1	P05023	95	10.56	341	7.57778	1.39	0	0.88	54	9	341	7.57778	1.19	0	0.88	48	8	341	7.57778	1.06	0	0.88
ATP1B3	P54709	1	0.11	12	0.266667	0.42	0	0.89	4	0.67	12	0.266667	2.5	0.05	0.7	2	0.33	12	0.266667	1.25	0	0.89
ATP2A2	P16615	84	9.33	365	8.11111	1.15	0	0.88	62	10.33	365	8.11111	1.27	0	0.88	42	7	365	8.11111	0.86	0	0.89
ATP2B1	P20020
ATP2C1	P98194	1	0.11	25	0.555556	0.2	0	0.89
ATP5F1A	P25705	98	10.89	515	11.4444	0.95	0	0.89	58	9.67	515	11.4444	0.84	0	0.89	56	9.33	515	11.4444	0.82	0	0.89
ATP5F1B	P06576	42	4.67	341	7.57778	0.62	0	0.88	25	4.17	341	7.57778	0.55	0	0.89	15	2.5	341	7.57778	0.33	0	0.89
ATP5F1C	P36542	12	1.33	61	1.35556	0.98	0.01	0.81
ATP5IF1	Q9UII2	1	0.11	7	0.155556	0.71	0	0.89
ATP5MD	Q96IX5	8	0.89	49	1.08889	0.82	0	0.83	5	0.83	49	1.08889	0.77	0	0.89	8	1.33	49	1.08889	1.22	0.01	0.81
ATP5MF	P56134	7	0.78	33	0.733333	1.06	0.01	0.81	1	0.17	33	0.733333	0.23	0	0.89
ATP5MG	O75964	3	0.33	7	0.155556	2.14	0.07	0.68	1	0.17	7	0.155556	1.07	0	0.89	2	0.33	7	0.155556	2.14	0	0.89
ATP5PD	O75947	5	0.56	41	0.911111	0.61	0	0.82	4	0.67	41	0.911111	0.73	0	0.89	3	0.5	41	0.911111	0.55	0.01	0.81
ATP6AP1	Q15904
ATP6V1A	P38606	17	1.89	304	6.75556	0.28	0	0.89	8	1.33	304	6.75556	0.2	0	0.89	6	1	304	6.75556	0.15	0	0.89
ATP6V1B2	P21281	7	0.78	206	4.57778	0.17	0	0.89
ATP6V1C1	P21283	4	0.44	23	0.511111	0.87	0	0.89								1	0.17	23	0.511111	0.33	0	0.89
ATP6V1D	Q9Y5K8
ATP6V1E1	P36543	6	0.67	68	1.51111	0.44	0.01	0.8	1	0.17	68	1.51111	0.11	0	0.89
ATP6V1F	Q16864	2	0.22	30	0.666667	0.33	0	0.89
ATP6V1G1	O75348								2	0.33	25	0.555556	0.6	0.02	0.77
ATP6V1G2	O95670	1	0.11	1	0.0222222	1.11	0	0.89
ATP6V1H	Q9UI12	21	2.33	52	1.15556	2.02	0.05	0.71	9	1.5	52	1.15556	1.3	0.01	0.8	8	1.33	52	1.15556	1.15	0.01	0.81
ATP8B2	P98198
ATP8B3	O60423	35	3.89	75	1.66667	2.33	0.16	0.56	22	3.67	75	1.66667	2.2	0.12	0.61	15	2.5	75	1.66667	1.5	0.04	0.72
ATRIP	Q8WXE1	1	0.11	9	0.2	0.56	0	0.89
ATRX	P46100	26	2.89	41	0.911111	3.17	0.17	0.54	10	1.67	41	0.911111	1.83	0.04	0.73	9	1.5	41	0.911111	1.65	0.04	0.73
ATXN10	Q9UBB4	10	1.11	99	2.2	0.51	0	0.85	5	0.83	99	2.2	0.38	0	0.89	3	0.5	99	2.2	0.23	0	0.89
ATXN1L	P0C7T5	1	0.11	0	0	1.11	0	0.89	2	0.33	0	0	3.33	0	0.89
ATXN2	Q99700	9	1	311	6.91111	0.14	0	0.89	2	0.33	311	6.91111	0.05	0	0.89
ATXN2L	Q8WWM7	107	11.89	1207	26.8222	0.44	0	0.89	25	4.17	1207	26.8222	0.16	0	0.89	25	4.17	1207	26.8222	0.16	0	0.89
ATXN3	P54252	3	0.33	96	2.13333	0.16	0	0.89								4	0.67	96	2.13333	0.31	0	0.89
ATXN7	O15265								2	0.33	0	0	3.33	0	0.89	2	0.33	0	0	3.33	0	0.89
ATXN7L3	Q14CW9								2	0.33	3	0.0666667	3.33	0	0.89	1	0.17	3	0.0666667	1.67	0	0.89
AURKA	O14965	1	0.11	38	0.844444	0.13	0	0.89	5	0.83	38	0.844444	0.99	0.02	0.77	7	1.17	38	0.844444	1.38	0.03	0.74
AURKB	Q96GD4	3	0.33	7	0.155556	2.14	0	0.89	5	0.83	7	0.155556	5.36	0	0.89	4	0.67	7	0.155556	4.29	0	0.89
AVEN	Q9NQS1	5	0.56	59	1.31111	0.42	0	0.84
AVL9	Q8NBF6	1	0.11	9	0.2	0.56	0	0.89
AXIN1	O15169	1	0.11	15	0.333333	0.33	0	0.89
AZI2	Q9H6S1
BABAM1	Q9NWV8	21	2.33	45	1	2.33	0.17	0.54	17	2.83	45	1	2.83	0.09	0.66	12	2	45	1	2	0.04	0.73
BABAM2	Q9NXR7	12	1.33	28	0.622222	2.14	0.03	0.74	5	0.83	28	0.622222	1.34	0	0.89	6	1	28	0.622222	1.61	0.02	0.78
BAG1	Q99933
BAG2	O95816	56	6.22	179	3.97778	1.56	0	0.83	36	6	179	3.97778	1.51	0	0.85	40	6.67	179	3.97778	1.68	0.02	0.77
BAG3	O95817	108	12	503	11.1778	1.07	0	0.88	39	6.5	503	11.1778	0.58	0	0.89	35	5.83	503	11.1778	0.52	0	0.89
BAG4	O95429	5	0.56	37	0.822222	0.68	0.01	0.81	4	0.67	37	0.822222	0.81	0.01	0.79	3	0.5	37	0.822222	0.61	0	0.89
BAG5	Q9UL15	2	0.22	29	0.644444	0.34	0	0.89	5	0.83	29	0.644444	1.29	0.02	0.77
BAG6	P46379	16	1.78	31	0.688889	2.58	0.09	0.65	13	2.17	31	0.688889	3.15	0.17	0.54	5	0.83	31	0.688889	1.21	0	0.89
BAIAP2	Q9UQB8	25	2.78	282	6.26667	0.44	0	0.89	2	0.33	282	6.26667	0.05	0	0.89	13	2.17	282	6.26667	0.35	0	0.89
BAIAP2L1	Q9UHR4	17	1.89	192	4.26667	0.44	0	0.89	4	0.67	192	4.26667	0.16	0	0.89	5	0.83	192	4.26667	0.2	0	0.89
BANF1	O75531	13	1.44	46	1.02222	1.41	0.05	0.71	7	1.17	46	1.02222	1.14	0.03	0.74	5	0.83	46	1.02222	0.82	0.02	0.77
BANP	Q8N9N5	2	0.22	10	0.222222	1	0.05	0.71	3	0.5	10	0.222222	2.25	0	0.89	1	0.17	10	0.222222	0.75	0	0.89
BAP1	Q92560	8	0.89	14	0.311111	2.86	0.09	0.65	2	0.33	14	0.311111	1.07	0	0.89
BAP18	Q8IXM2	36	4	40	0.888889	4.5	0.42	0.31	25	4.17	40	0.888889	4.69	0.54	0.22	19	3.17	40	0.888889	3.56	0.24	0.48
BARD1	Q99728	10	1.11	6	0.133333	8.33	0.23	0.48	7	1.17	6	0.133333	8.75	0.24	0.47	4	0.67	6	0.133333	5	0	0.89
BASP1	P80723	32	3.56	359	7.97778	0.45	0	0.89	24	4	359	7.97778	0.5	0	0.89	27	4.5	359	7.97778	0.56	0	0.89
BATF3	Q9NR55	2	0.22	0	0	2.22	0	0.89	4	0.67	0	0	6.67	0.13	0.59	10	1.67	0	0	16.67	0.45	0.28
BAZ1A	Q9NRL2	58	6.44	61	1.35556	4.75	0.44	0.29	58	9.67	61	1.35556	7.13	0.71	0.12	45	7.5	61	1.35556	5.53	0.49	0.26
BAZ1B	Q9UIG0	60	6.67	255	5.66667	1.18	0	0.85	86	14.33	255	5.66667	2.53	0.02	0.76	107	17.83	255	5.66667	3.15	0.15	0.56
BAZ2A	Q9UIF9	47	5.22	10	0.222222	23.5	0.66	0.14	34	5.67	10	0.222222	25.5	0.99	0	9	1.5	10	0.222222	6.75	0.26	0.45
BAZ2B	Q9UIF8	3	0.33	0	0	3.33	0	0.89	1	0.17	0	0	1.67	0	0.89
BBS1	Q8NFJ9								1	0.17	0	0	1.67	0	0.89
BBS2	Q9BXC9
BBS7	Q8IWZ6	1	0.11	5	0.111111	1	0	0.89								1	0.17	5	0.111111	1.5	0	0.89
BBX	Q8WY36	20	2.22	26	0.577778	3.85	0.22	0.49	25	4.17	26	0.577778	7.21	0.44	0.3	13	2.17	26	0.577778	3.75	0.16	0.54
BCAP31	P51572	17	1.89	39	0.866667	2.18	0.11	0.64	2	0.33	39	0.866667	0.38	0	0.89
BCAR1	P56945															2	0.33	20	0.444444	0.75	0	0.89
BCAS2	O75934	83	9.22	180	4	2.31	0.11	0.62	52	8.67	180	4	2.17	0.02	0.76	54	9	180	4	2.25	0.04	0.72
BCAS3	Q9H6U6	29	3.22	181	4.02222	0.8	0	0.87	4	0.67	181	4.02222	0.17	0	0.89	10	1.67	181	4.02222	0.41	0	0.89
BCAT1	P54687
BCCIP	Q9P287	17	1.89	279	6.2	0.3	0	0.89	16	2.67	279	6.2	0.43	0	0.89	10	1.67	279	6.2	0.27	0	0.89
BCKDHB	P21953								2	0.33	3	0.0666667	3.33	0	0.89
BCL7A	Q4VC05	1	0.11	9	0.2	0.56	0	0.89	13	2.17	9	0.2	10.83	0.46	0.27	13	2.17	9	0.2	10.83	0.35	0.37
BCL7C	Q8WUZ0	8	0.89	4	0.0888889	8.89	0.17	0.54	8	1.33	4	0.0888889	13.33	0.25	0.46	3	0.5	4	0.0888889	5	0	0.89
BCL9	O00512	49	5.44	80	1.77778	3.06	0.23	0.49	33	5.5	80	1.77778	3.09	0.2	0.51	22	3.67	80	1.77778	2.06	0.03	0.74
BCL9L	Q86UU0	10	1.11	7	0.155556	7.14	0.27	0.44	4	0.67	7	0.155556	4.29	0.1	0.64	1	0.17	7	0.155556	1.07	0	0.89
BCLAF1	Q9NYF8	135	15	758	16.8444	0.89	0	0.89	88	14.67	758	16.8444	0.87	0	0.89	78	13	758	16.8444	0.77	0	0.89
BCOR	Q6W2J9	88	9.78	312	6.93333	1.41	0	0.86	125	20.83	312	6.93333	3	0.14	0.57	12	2	312	6.93333	0.29	0	0.89
BCORL1	Q5H9F3	2	0.22	9	0.2	1.11	0	0.89	3	0.5	9	0.2	2.5	0	0.89
BCR	P11274	12	1.33	280	6.22222	0.21	0	0.89	4	0.67	280	6.22222	0.11	0	0.89	4	0.67	280	6.22222	0.11	0	0.89
BDNF	P23560								1	0.17	2	0.0444444	1.67	0	0.89
BECN1	Q14457	3	0.33	6	0.133333	2.5	0.07	0.68								3	0.5	6	0.133333	3.75	0.11	0.62
BEND3	Q5T5X7	29	3.22	4	0.0888889	32.22	0.83	0.06	42	7	4	0.0888889	70	1	0	22	3.67	4	0.0888889	36.67	0.82	0.06
BET1	O15155
BHLHA15	Q7RTS1															4	0.67	0	0	6.67	0	0.89
BICD2	Q8TD16	11	1.22	656	14.5778	0.08	0	0.89								4	0.67	656	14.5778	0.05	0	0.89
BICRA	Q9NZM4	9	1	5	0.111111	9	0.08	0.67	2	0.33	5	0.111111	3	0	0.89	4	0.67	5	0.111111	6	0	0.89
BIN1	O00499	6	0.67	57	1.26667	0.53	0	0.82	1	0.17	57	1.26667	0.13	0	0.89	1	0.17	57	1.26667	0.13	0	0.89
BIN3	Q9NQY0	1	0.11	15	0.333333	0.33	0	0.89								1	0.17	15	0.333333	0.5	0	0.89
BioID	BioID	16108	1789.78	27856	619.022	2.89	0	0.89	13204	2200.67	27856	619.022	3.56	0	0.89	13477	2246.17	27856	619.022	3.63	0	0.89
BioID2	BioID2	9	1	23402	520.044	0	0	0.89	6	1	23402	520.044	0	0	0.89	6	1	23402	520.044	0	0	0.89
BIRC6	Q9NR09	1	0.11	26	0.577778	0.19	0	0.89
BLM	P54132	22	2.44	96	2.13333	1.15	0.02	0.77	32	5.33	96	2.13333	2.5	0.08	0.67	22	3.67	96	2.13333	1.72	0.03	0.75
BLOC1S1	P78537	1	0.11	7	0.155556	0.71	0	0.89
BLOC1S2	Q6QNY1	2	0.22	41	0.911111	0.24	0	0.89
BLOC1S3	Q6QNY0
BLOC1S4	Q9NUP1
BLOC1S5	Q8TDH9
BLOC1S6	Q9UL45
BLVRA	P53004	12	1.33	126	2.8	0.48	0	0.87	6	1	126	2.8	0.36	0	0.87	17	2.83	126	2.8	1.01	0	0.85
BLVRB	P30043								1	0.17	10	0.222222	0.75	0	0.89
BMI1	P35226	1	0.11	11	0.244444	0.45	0	0.89	3	0.5	11	0.244444	2.05	0	0.89	1	0.17	11	0.244444	0.68	0	0.89
BMP2K	Q9NSY1	1	0.11	21	0.466667	0.24	0	0.89								3	0.5	21	0.466667	1.07	0	0.89
BMS1	Q14692	9	1	74	1.64444	0.61	0	0.83	14	2.33	74	1.64444	1.42	0.02	0.77	8	1.33	74	1.64444	0.81	0	0.84
BOD1	Q96IK1								1	0.17	14	0.311111	0.54	0	0.89
BOD1L1	Q8NFC6	127	14.11	243	5.4	2.61	0.13	0.59	52	8.67	243	5.4	1.6	0	0.85	22	3.67	243	5.4	0.68	0	0.88
BOLA2; BOLA2B	Q9H3K6	21	2.33	117	2.6	0.9	0	0.86	8	1.33	117	2.6	0.51	0	0.89	5	0.83	117	2.6	0.32	0	0.89
BOP1	Q14137	92	10.22	100	2.22222	4.6	0.49	0.25	54	9	100	2.22222	4.05	0.39	0.34	86	14.33	100	2.22222	6.45	0.89	0.03
BORCS5	Q969J3								1	0.17	34	0.755556	0.22	0	0.89	1	0.17	34	0.755556	0.22	0	0.89
BORCS6	Q96GS4	4	0.44	23	0.511111	0.87	0.01	0.78	2	0.33	23	0.511111	0.65	0	0.89	3	0.5	23	0.511111	0.98	0.02	0.76
BORCS7	Q96B45
BORCS8	Q96FH0	1	0.11	1	0.0222222	1.11	0	0.89	1	0.17	1	0.0222222	1.67	0	0.89	2	0.33	1	0.0222222	3.33	0	0.89
BPNT1	O95861	13	1.44	146	3.24444	0.45	0	0.89	4	0.67	146	3.24444	0.21	0	0.89	12	2	146	3.24444	0.62	0	0.86
BPTF	Q12830	106	11.78	132	2.93333	4.02	0.47	0.26	72	12	132	2.93333	4.09	0.46	0.28	28	4.67	132	2.93333	1.59	0.02	0.77
BRAF	P15056
BRAP	Q7Z569	102	11.33	216	4.8	2.36	0.13	0.59	21	3.5	216	4.8	0.73	0	0.88	36	6	216	4.8	1.25	0	0.86
BRAT1	Q6PJG6								2	0.33	0	0	3.33	0	0.89
BRCA1	P38398	23	2.56	86	1.91111	1.34	0.01	0.78	22	3.67	86	1.91111	1.92	0.06	0.69	8	1.33	86	1.91111	0.7	0	0.84
BRCA2	P51587	2	0.22	5	0.111111	2	0.08	0.67
BRCC3	P46736	15	1.67	75	1.66667	1	0.03	0.76	12	2	75	1.66667	1.2	0.02	0.77	1	0.17	75	1.66667	0.1	0	0.89
BRD2	P25440	11	1.22	165	3.66667	0.33	0	0.89	15	2.5	165	3.66667	0.68	0	0.87	37	6.17	165	3.66667	1.68	0.01	0.81
BRD3	Q15059	27	3	122	2.71111	1.11	0	0.85	26	4.33	122	2.71111	1.6	0.01	0.81	39	6.5	122	2.71111	2.4	0.07	0.68
BRD4	O60885	199	22.11	127	2.82222	7.83	0.87	0.04	135	22.5	127	2.82222	7.97	0.9	0.03	68	11.33	127	2.82222	4.02	0.33	0.38
BRD8	Q9H0E9	14	1.56	15	0.333333	4.67	0.23	0.48	10	1.67	15	0.333333	5	0.23	0.49	5	0.83	15	0.333333	2.5	0.1	0.64
BRD9	Q9H8M2								4	0.67	7	0.155556	4.29	0.1	0.64	6	1	7	0.155556	6.43	0.21	0.51
BRF1	Q92994	4	0.44	1	0.0222222	4.44	0	0.89	4	0.67	1	0.0222222	6.67	0.13	0.59	2	0.33	1	0.0222222	3.33	0	0.89
BRI3BP	Q8WY22	4	0.44	16	0.355556	1.25	0	0.89	4	0.67	16	0.355556	1.87	0.04	0.73	3	0.5	16	0.355556	1.41	0	0.89
BRIP1	Q9BX63	103	11.44	115	2.55556	4.48	0.55	0.21	98	16.33	115	2.55556	6.39	0.95	0.01	44	7.33	115	2.55556	2.87	0.23	0.48
BRIX1	Q8TDN6	2	0.22	33	0.733333	0.3	0	0.89
BRMS1L	Q5PSV4	6	0.67	2	0.0444444	6.67	0.17	0.54	8	1.33	2	0.0444444	13.33	0.38	0.34	1	0.17	2	0.0444444	1.67	0	0.89
BRPF3	Q9ULD4	6	0.67	1	0.0222222	6.67	0	0.89	2	0.33	1	0.0222222	3.33	0	0.89	2	0.33	1	0.0222222	3.33	0	0.89
BSDC1	Q9NW68	1	0.11	42	0.933333	0.12	0	0.89	1	0.17	42	0.933333	0.18	0	0.89	1	0.17	42	0.933333	0.18	0	0.89
BSG	P35613	11	1.22	74	1.64444	0.74	0	0.84	20	3.33	74	1.64444	2.03	0.03	0.75	10	1.67	74	1.64444	1.01	0	0.83
BTAF1	O14981	18	2	75	1.66667	1.2	0.02	0.76	19	3.17	75	1.66667	1.9	0.03	0.75	17	2.83	75	1.66667	1.7	0.03	0.75
BTBD1	Q9H0C5	2	0.22	1	0.0222222	2.22	0	0.89
BTF3	P20290	184	20.44	2586	57.4667	0.36	0	0.89	142	23.67	2586	57.4667	0.41	0	0.89	424	70.67	2586	57.4667	1.23	0	0.89
BTF3L4	Q96K17	66	7.33	1145	25.4444	0.29	0	0.89	31	5.17	1145	25.4444	0.2	0	0.89	61	10.17	1145	25.4444	0.4	0	0.89
BTRC	Q9Y297
BUB1	O43683	2	0.22	13	0.288889	0.77	0	0.89	3	0.5	13	0.288889	1.73	0.05	0.7	2	0.33	13	0.288889	1.15	0	0.89
BUB1B	O60566	6	0.67	90	2	0.33	0	0.89								2	0.33	90	2	0.17	0	0.89
BUB3	O43684	84	9.33	370	8.22222	1.14	0	0.88	44	7.33	370	8.22222	0.89	0	0.89	50	8.33	370	8.22222	1.01	0	0.88
BUD13	Q9BRD0	20	2.22	32	0.711111	3.12	0.14	0.58	18	3	32	0.711111	4.22	0.29	0.42	31	5.17	32	0.711111	7.27	0.61	0.17
BUD31	P41223	13	1.44	47	1.04444	1.38	0.03	0.74	18	3	47	1.04444	2.87	0.16	0.56	39	6.5	47	1.04444	6.22	0.67	0.14
BYSL	Q13895	16	1.78	97	2.15556	0.82	0	0.84	4	0.67	97	2.15556	0.31	0	0.89	4	0.67	97	2.15556	0.31	0	0.89
BZW2	Q9Y6E2	2	0.22	72	1.6	0.14	0	0.89								2	0.33	72	1.6	0.21	0	0.89
C11orf49	Q9H6J7	8	0.89	7	0.155556	5.71	0.13	0.59	7	1.17	7	0.155556	7.5	0.23	0.49	1	0.17	7	0.155556	1.07	0	0.89
C11orf88	Q6PI97
C12orf10	Q9HB07								2	0.33	77	1.71111	0.19	0	0.89	4	0.67	77	1.71111	0.39	0	0.85
C12orf29	Q8N999	1	0.11	34	0.755556	0.15	0	0.89	1	0.17	34	0.755556	0.22	0	0.89
C12orf45	Q8N5I9	30	3.33	88	1.95556	1.7	0.02	0.77	28	4.67	88	1.95556	2.39	0.1	0.64	27	4.5	88	1.95556	2.3	0.05	0.71
C12orf57	Q99622	1	0.11	5	0.111111	1	0	0.89
C14orf93	Q9H972	1	0.11	0	0	1.11	0	0.89
C15orf39	Q6ZRI6	1	0.11	7	0.155556	0.71	0	0.89
C16orf70	Q9BSU1	3	0.33	62	1.37778	0.24	0	0.84	1	0.17	62	1.37778	0.12	0	0.89	1	0.17	62	1.37778	0.12	0	0.89
C17orf75	Q9HAS0	4	0.44	9	0.2	2.22	0	0.89	1	0.17	9	0.2	0.83	0	0.89	1	0.17	9	0.2	0.83	0	0.89
C17orf80	Q9BSJ5															2	0.33	1	0.0222222	3.33	0	0.89
C18orf21	Q32NC0
C18orf25	Q96B23	3	0.33	83	1.84444	0.18	0	0.89	6	1	83	1.84444	0.54	0	0.85	15	2.5	83	1.84444	1.36	0.01	0.81
C19orf47	Q8N9M1															1	0.17	35	0.777778	0.21	0	0.89
C1D	Q13901								2	0.33	0	0	3.33	0.13	0.59	5	0.83	0	0	8.33	0.26	0.45
C1orf112	Q9NSG2
C1orf122	Q6ZSJ8															1	0.17	12	0.266667	0.62	0	0.89
C1orf174	Q8IYL3	6	0.67	25	0.555556	1.2	0	0.89	4	0.67	25	0.555556	1.2	0.02	0.77	6	1	25	0.555556	1.8	0.04	0.73
C1orf198	Q9H425	8	0.89	94	2.08889	0.43	0	0.89	1	0.17	94	2.08889	0.08	0	0.89	3	0.5	94	2.08889	0.24	0	0.89
C1orf50	Q9BV19								1	0.17	0	0	1.67	0	0.89	1	0.17	0	0	1.67	0	0.89
C1orf52	Q8N6N3	83	9.22	196	4.35556	2.12	0.02	0.77	59	9.83	196	4.35556	2.26	0.02	0.76	60	10	196	4.35556	2.3	0.02	0.76
C1QBP	Q07021	44	4.89	342	7.6	0.64	0	0.89	28	4.67	342	7.6	0.61	0	0.89	17	2.83	342	7.6	0.37	0	0.89
C20orf27	Q9GZN8	8	0.89	516	11.4667	0.08	0	0.89	1	0.17	516	11.4667	0.01	0	0.89	1	0.17	516	11.4667	0.01	0	0.89
C2CD4C	Q8TF44	15	1.67	67	1.48889	1.12	0.01	0.8	9	1.5	67	1.48889	1.01	0	0.82	8	1.33	67	1.48889	0.9	0	0.83
C2CD5	Q86YS7	1	0.11	52	1.15556	0.1	0	0.89								1	0.17	52	1.15556	0.14	0	0.89
C2orf49	Q9BVC5	1	0.11	7	0.155556	0.71	0	0.89	6	1	7	0.155556	6.43	0.2	0.51	7	1.17	7	0.155556	7.5	0.35	0.37
C5orf24	Q7Z6I8								3	0.5	29	0.644444	0.78	0.02	0.77	10	1.67	29	0.644444	2.59	0.13	0.61
C5orf51	A6NDU8	4	0.44	30	0.666667	0.67	0.01	0.8	7	1.17	30	0.666667	1.75	0.01	0.78	6	1	30	0.666667	1.5	0	0.89
C6orf120	Q7Z4R8	2	0.22	18	0.4	0.56	0	0.89	1	0.17	18	0.4	0.42	0	0.89
C6orf132	Q5T0Z8	5	0.56	6	0.133333	4.17	0	0.89	1	0.17	6	0.133333	1.25	0	0.89	2	0.33	6	0.133333	2.5	0	0.89
C6orf47	O95873	1	0.11	9	0.2	0.56	0	0.89
C7orf26	Q96N11								1	0.17	46	1.02222	0.16	0	0.89
C7orf50	Q9BRJ6
C8orf33	Q9H7E9
C9orf64	Q5T6V5															1	0.17	10	0.222222	0.75	0	0.89
C9orf78	Q9NZ63	61	6.78	177	3.93333	1.72	0.01	0.8	40	6.67	177	3.93333	1.69	0	0.84	42	7	177	3.93333	1.78	0	0.83
CAAP1	Q9H8G2	4	0.44	8	0.177778	2.5	0	0.89	3	0.5	8	0.177778	2.81	0.09	0.65	5	0.83	8	0.177778	4.69	0.09	0.65
CAB39	Q9Y376	1	0.11	44	0.977778	0.11	0	0.89	1	0.17	44	0.977778	0.17	0	0.89
CABIN1	Q9Y6J0	10	1.11	4	0.0888889	11.11	0.27	0.44	6	1	4	0.0888889	10	0.38	0.35	1	0.17	4	0.0888889	1.67	0	0.89
CABP7	Q86V35	4	0.44	0	0	4.44	0	0.89	1	0.17	0	0	1.67	0	0.89
CACTIN	Q8WUQ7	122	13.56	68	1.51111	8.97	0.93	0.02	103	17.17	68	1.51111	11.36	0.99	0	77	12.83	68	1.51111	8.49	0.89	0.03
CACUL1	Q86Y37	29	3.22	62	1.37778	2.34	0.07	0.68	35	5.83	62	1.37778	4.23	0.4	0.32	26	4.33	62	1.37778	3.15	0.15	0.56
CACYBP	Q9HB71	139	15.44	1043	23.1778	0.67	0	0.89	70	11.67	1043	23.1778	0.5	0	0.89	109	18.17	1043	23.1778	0.78	0	0.89
CAD	P27708	45	5	316	7.02222	0.71	0	0.88	42	7	316	7.02222	1	0	0.88	41	6.83	316	7.02222	0.97	0	0.88
CALD1	Q05682	87	9.67	478	10.6222	0.91	0	0.89	33	5.5	478	10.6222	0.52	0	0.89	38	6.33	478	10.6222	0.6	0	0.89
CALM3	P0DP25	27	3	195	4.33333	0.69	0	0.88	23	3.83	195	4.33333	0.88	0	0.88	39	6.5	195	4.33333	1.5	0	0.85
CALR	P27797	7	0.78	110	2.44444	0.32	0	0.85	8	1.33	110	2.44444	0.55	0	0.83	8	1.33	110	2.44444	0.55	0	0.85
CALU	O43852	2	0.22	91	2.02222	0.11	0	0.89
CAMK1	Q14012	1	0.11	27	0.6	0.19	0	0.89
CAMK2D	Q13557	6	0.67	67	1.48889	0.45	0	0.85	4	0.67	67	1.48889	0.45	0	0.89	1	0.17	67	1.48889	0.11	0	0.89
CAMK2G	Q13555	14	1.56	67	1.48889	1.04	0.01	0.79	7	1.17	67	1.48889	0.78	0.01	0.79	11	1.83	67	1.48889	1.23	0.07	0.68
CAMK4	Q16566	20	2.22	72	1.6	1.39	0.04	0.73	6	1	72	1.6	0.62	0	0.83	9	1.5	72	1.6	0.94	0	0.83
CAMSAP1	Q5T5Y3	146	16.22	812	18.0444	0.9	0	0.89	37	6.17	812	18.0444	0.34	0	0.89	43	7.17	812	18.0444	0.4	0	0.89
CAMSAP2	Q08AD1	1	0.11	119	2.64444	0.04	0	0.89
CAMSAP3	Q9P1Y5	5	0.56	41	0.911111	0.61	0.01	0.81	3	0.5	41	0.911111	0.55	0	0.89	4	0.67	41	0.911111	0.73	0	0.89
CAND1	Q86VP6	14	1.56	145	3.22222	0.48	0	0.86	8	1.33	145	3.22222	0.41	0	0.89	7	1.17	145	3.22222	0.36	0	0.89
CAND2	O75155								1	0.17	12	0.266667	0.62	0	0.89
CANX	P27824	65	7.22	408	9.06667	0.8	0	0.89	33	5.5	408	9.06667	0.61	0	0.89	29	4.83	408	9.06667	0.53	0	0.89
CAP1	Q01518	54	6	437	9.71111	0.62	0	0.89	18	3	437	9.71111	0.31	0	0.89	25	4.17	437	9.71111	0.43	0	0.89
CAPN1	P07384	4	0.44	83	1.84444	0.24	0	0.89	1	0.17	83	1.84444	0.09	0	0.89
CAPN15	O75808	4	0.44	12	0.266667	1.67	0	0.89	7	1.17	12	0.266667	4.38	0.11	0.63	7	1.17	12	0.266667	4.38	0.12	0.62
CAPN2	P17655	1	0.11	71	1.57778	0.07	0	0.89	1	0.17	71	1.57778	0.11	0	0.89
CAPN7	Q9Y6W3
CAPNS1	P04632	5	0.56	92	2.04444	0.27	0	0.89	11	1.83	92	2.04444	0.9	0	0.84	1	0.17	92	2.04444	0.08	0	0.89
CAPRIN1	Q14444	40	4.44	479	10.6444	0.42	0	0.89	19	3.17	479	10.6444	0.3	0	0.89	26	4.33	479	10.6444	0.41	0	0.89
CAPZA1	P52907	110	12.22	546	12.1333	1.01	0	0.89	57	9.5	546	12.1333	0.78	0	0.89	62	10.33	546	12.1333	0.85	0	0.89
CAPZA2	P47755	30	3.33	182	4.04444	0.82	0	0.88	16	2.67	182	4.04444	0.66	0	0.89	25	4.17	182	4.04444	1.03	0	0.87
CAPZB	P47756	59	6.56	438	9.73333	0.67	0	0.89	29	4.83	438	9.73333	0.5	0	0.89	34	5.67	438	9.73333	0.58	0	0.89
CARD8	Q9Y2G2															1	0.17	31	0.688889	0.24	0	0.89
CARHSP1	Q9Y2V2	5	0.56	93	2.06667	0.27	0	0.89
CARM1	Q86X55								1	0.17	5	0.111111	1.5	0	0.89
CARMIL1	Q5VZK9	2	0.22	31	0.688889	0.32	0	0.89
CARMIL2	Q6F5E8	5	0.56	26	0.577778	0.96	0	0.89	2	0.33	26	0.577778	0.58	0	0.89	3	0.5	26	0.577778	0.87	0	0.89
CARS1	P49589	12	1.33	179	3.97778	0.34	0	0.87								3	0.5	179	3.97778	0.13	0	0.89
CASC3	O15234	1	0.11	9	0.2	0.56	0	0.89
CASK	O14936	3	0.33	39	0.866667	0.38	0	0.82								1	0.17	39	0.866667	0.19	0	0.89
CASKIN1	Q8WXD9	3	0.33	2	0.0444444	3.33	0	0.89								1	0.17	2	0.0444444	1.67	0	0.89
CASKIN2	Q8WXE0	2	0.22	21	0.466667	0.48	0	0.89								2	0.33	21	0.466667	0.71	0	0.89
CASP10	Q92851
CASP2	P42575								1	0.17	3	0.0666667	1.67	0	0.89
CASP3	P42574	2	0.22	126	2.8	0.08	0	0.89
CASP8	Q14790	2	0.22	157	3.48889	0.06	0	0.89								5	0.83	157	3.48889	0.24	0	0.89
CASP8AP2	Q9UKL3	3	0.33	0	0	3.33	0.09	0.66	2	0.33	0	0	3.33	0	0.89	1	0.17	0	0	1.67	0	0.89
CASP9	P55211
CAST	P20810	66	7.33	462	10.2667	0.71	0	0.89	49	8.17	462	10.2667	0.8	0	0.89	57	9.5	462	10.2667	0.93	0	0.89
CASZ1	Q86V15	10	1.11	19	0.422222	2.63	0.06	0.7	8	1.33	19	0.422222	3.16	0.09	0.65	5	0.83	19	0.422222	1.97	0.06	0.7
CAT	P04040	6	0.67	102	2.26667	0.29	0	0.89	3	0.5	102	2.26667	0.22	0	0.89	1	0.17	102	2.26667	0.07	0	0.89
CBFB	Q13951	1	0.11	53	1.17778	0.09	0	0.89	3	0.5	53	1.17778	0.42	0	0.89	3	0.5	53	1.17778	0.42	0	0.89
CBL	P22681	18	2	126	2.8	0.71	0	0.85	1	0.17	126	2.8	0.06	0	0.89	11	1.83	126	2.8	0.65	0	0.87
CBLB	Q13191
CBLL1	Q75N03	8	0.89	8	0.177778	5	0.13	0.61
CBR1	P16152	2	0.22	107	2.37778	0.09	0	0.89								1	0.17	107	2.37778	0.07	0	0.89
CBSL	P0DN79	1	0.11	91	2.02222	0.05	0	0.89
CBWD1	Q9BRT8
CBWD3	Q5JTY5
CBX1	P83916	17	1.89	119	2.64444	0.71	0	0.86	4	0.67	119	2.64444	0.25	0	0.89	6	1	119	2.64444	0.38	0	0.87
CBX2	Q14781	5	0.56	15	0.333333	1.67	0	0.89	2	0.33	15	0.333333	1	0	0.89	3	0.5	15	0.333333	1.5	0	0.89
CBX3	Q13185	77	8.56	332	7.37778	1.16	0	0.87	51	8.5	332	7.37778	1.15	0	0.88	39	6.5	332	7.37778	0.88	0	0.89
CBX4	O00257	9	1	22	0.488889	2.05	0.08	0.67	16	2.67	22	0.488889	5.45	0.44	0.29	10	1.67	22	0.488889	3.41	0.24	0.48
CBX5	P45973	28	3.11	189	4.2	0.74	0	0.87	28	4.67	189	4.2	1.11	0	0.87	33	5.5	189	4.2	1.31	0	0.86
CBX8	Q9HC52	18	2	35	0.777778	2.57	0.16	0.56	19	3.17	35	0.777778	4.07	0.28	0.43	12	2	35	0.777778	2.57	0.09	0.65
CC2D1A	Q6P1N0	8	0.89	386	8.57778	0.1	0	0.89	4	0.67	386	8.57778	0.08	0	0.89	10	1.67	386	8.57778	0.19	0	0.89
CC2D1B	Q5T0F9															2	0.33	35	0.777778	0.43	0	0.89
CCAR1	Q8IX12	29	3.22	224	4.97778	0.65	0	0.88	23	3.83	224	4.97778	0.77	0	0.88	10	1.67	224	4.97778	0.33	0	0.89
CCAR2	Q8N163	126	14	434	9.64444	1.45	0	0.88	118	19.67	434	9.64444	2.04	0	0.86	99	16.5	434	9.64444	1.71	0	0.87
CCDC110	Q8TBZ0
CCDC115	Q96NT0
CCDC117	Q8IWD4	1	0.11	17	0.377778	0.29	0	0.89	1	0.17	17	0.377778	0.44	0	0.89
CCDC12	Q8WUD4	17	1.89	27	0.6	3.15	0.18	0.53	18	3	27	0.6	5	0.4	0.33	6	1	27	0.6	1.67	0.03	0.74
CCDC124	Q96CT7	11	1.22	245	5.44444	0.22	0	0.89	4	0.67	245	5.44444	0.12	0	0.89	17	2.83	245	5.44444	0.52	0	0.89
CCDC130	P13994	1	0.11	1	0.0222222	1.11	0	0.89								3	0.5	1	0.0222222	5	0	0.89
CCDC134	Q9H6E4															1	0.17	0	0	1.67	0	0.89
CCDC157	Q569K6
CCDC174	Q6PII3	20	2.22	26	0.577778	3.85	0.16	0.55	14	2.33	26	0.577778	4.04	0.18	0.52	23	3.83	26	0.577778	6.63	0.44	0.29
CCDC186	Q7Z3E2	2	0.22	12	0.266667	0.83	0	0.89	1	0.17	12	0.266667	0.62	0	0.89
CCDC22	O60826	3	0.33	25	0.555556	0.6	0.01	0.79
CCDC25	Q86WR0	21	2.33	182	4.04444	0.58	0	0.87	8	1.33	182	4.04444	0.33	0	0.89	12	2	182	4.04444	0.49	0	0.89
CCDC43	Q96MW1	36	4	207	4.6	0.87	0	0.87	27	4.5	207	4.6	0.98	0	0.87	35	5.83	207	4.6	1.27	0	0.87
CCDC47	Q96A33	25	2.78	113	2.51111	1.11	0	0.82	18	3	113	2.51111	1.19	0.01	0.81	10	1.67	113	2.51111	0.66	0	0.86
CCDC50	Q8IVM0	27	3	255	5.66667	0.53	0	0.88	8	1.33	255	5.66667	0.24	0	0.89	22	3.67	255	5.66667	0.65	0	0.88
CCDC6	Q16204	44	4.89	281	6.24444	0.78	0	0.88	27	4.5	281	6.24444	0.72	0	0.89	25	4.17	281	6.24444	0.67	0	0.89
CCDC70	Q6NSX1
CCDC8	Q9H0W5	6	0.67	172	3.82222	0.17	0	0.89	10	1.67	172	3.82222	0.44	0	0.89	8	1.33	172	3.82222	0.35	0	0.89
CCDC84	Q86UT8
CCDC85B	Q15834
CCDC85C	A6NKD9	24	2.67	214	4.75556	0.56	0	0.88	4	0.67	214	4.75556	0.14	0	0.89	6	1	214	4.75556	0.21	0	0.89
CCDC86	Q9H6F5	1	0.11	14	0.311111	0.36	0	0.89	2	0.33	14	0.311111	1.07	0.05	0.72	1	0.17	14	0.311111	0.54	0	0.89
CCDC87	Q9NVE4
CCDC9	Q9Y3X0	9	1	12	0.266667	3.75	0.24	0.48	5	0.83	12	0.266667	3.12	0.11	0.63	5	0.83	12	0.266667	3.12	0.12	0.62
CCDC92	Q53HC0
CCDC93	Q567U6	1	0.11	6	0.133333	0.83	0	0.89
CCDC97	Q96F63	30	3.33	62	1.37778	2.42	0.1	0.64	32	5.33	62	1.37778	3.87	0.38	0.35	25	4.17	62	1.37778	3.02	0.19	0.52
CCER2	I3L3R5	5	0.56	10	0.222222	2.5	0.05	0.72								2	0.33	10	0.222222	1.5	0	0.89
CCNA2	P20248	7	0.78	50	1.11111	0.7	0.01	0.81	7	1.17	50	1.11111	1.05	0.01	0.8	1	0.17	50	1.11111	0.15	0	0.89
CCNB1	P14635								3	0.5	71	1.57778	0.32	0	0.85	4	0.67	71	1.57778	0.42	0	0.89
CCNE1	P24864	1	0.11	0	0	1.11	0	0.89
CCNE2	O96020
CCNH	P51946	46	5.11	95	2.11111	2.42	0.14	0.58	49	8.17	95	2.11111	3.87	0.29	0.41	35	5.83	95	2.11111	2.76	0.11	0.63
CCNK	O75909	116	12.89	146	3.24444	3.97	0.76	0.09	90	15	146	3.24444	4.62	0.85	0.05	62	10.33	146	3.24444	3.18	0.4	0.33
CCNL1	Q9UK58	21	2.33	8	0.177778	13.12	0.6	0.18	13	2.17	8	0.177778	12.19	0.52	0.23	5	0.83	8	0.177778	4.69	0.18	0.53
CCNL2	Q96S94	18	2	7	0.155556	12.86	0.45	0.28	8	1.33	7	0.155556	8.57	0.3	0.41	6	1	7	0.155556	6.43	0	0.89
CCNQ	Q8N1B3	3	0.33	0	0	3.33	0	0.89	4	0.67	0	0	6.67	0	0.89
CCNT1	O60563	108	12	210	4.66667	2.57	0.07	0.68	67	11.17	210	4.66667	2.39	0.02	0.76	59	9.83	210	4.66667	2.11	0.01	0.8
CCNT2	O60583	15	1.67	21	0.466667	3.57	0.15	0.57	4	0.67	21	0.466667	1.43	0	0.89	4	0.67	21	0.466667	1.43	0.05	0.71
CCS	O14618	1	0.11	49	1.08889	0.1	0	0.89	1	0.17	49	1.08889	0.15	0	0.89	11	1.83	49	1.08889	1.68	0.02	0.76
CCT2	P78371	939	104.33	2652	58.9333	1.77	0	0.89	440	73.33	2652	58.9333	1.24	0	0.89	369	61.5	2652	58.9333	1.04	0	0.89
CCT3	P49368	472	52.44	1490	33.1111	1.58	0	0.89	195	32.5	1490	33.1111	0.98	0	0.89	192	32	1490	33.1111	0.97	0	0.89
CCT4	P50991	381	42.33	1181	26.2444	1.61	0	0.89	150	25	1181	26.2444	0.95	0	0.89	139	23.17	1181	26.2444	0.88	0	0.89
CCT5	P48643	496	55.11	1986	44.1333	1.25	0	0.89	234	39	1986	44.1333	0.88	0	0.89	204	34	1986	44.1333	0.77	0	0.89
CCT6A	P40227	332	36.89	1410	31.3333	1.18	0	0.89	188	31.33	1410	31.3333	1	0	0.89	128	21.33	1410	31.3333	0.68	0	0.89
CCT7	Q99832	526	58.44	1562	34.7111	1.68	0	0.89	178	29.67	1562	34.7111	0.85	0	0.89	167	27.83	1562	34.7111	0.8	0	0.89
CCT8	P50990	453	50.33	2190	48.6667	1.03	0	0.89	134	22.33	2190	48.6667	0.46	0	0.89	148	24.67	2190	48.6667	0.51	0	0.89
CD19	P15391
CD2AP	Q9Y5K6	235	26.11	894	19.8667	1.31	0	0.89	44	7.33	894	19.8667	0.37	0	0.89	58	9.67	894	19.8667	0.49	0	0.89
CD2BP2	O95400	19	2.11	73	1.62222	1.3	0.01	0.79	19	3.17	73	1.62222	1.95	0.02	0.76	12	2	73	1.62222	1.23	0	0.82
CD3EAP	O15446	6	0.67	44	0.977778	0.68	0.01	0.81	3	0.5	44	0.977778	0.51	0	0.89	4	0.67	44	0.977778	0.68	0.01	0.81
CD99	P14209	2	0.22	29	0.644444	0.34	0	0.89
CDAN1	Q8IWY9	9	1	0	0	10	0.21	0.5	9	1.5	0	0	15	0.42	0.31	2	0.33	0	0	3.33	0	0.89
CDC123	O75794	4	0.44	48	1.06667	0.42	0	0.89	4	0.67	48	1.06667	0.62	0	0.82
CDC16	Q13042	28	3.11	63	1.4	2.22	0.08	0.66	12	2	63	1.4	1.43	0.01	0.8	11	1.83	63	1.4	1.31	0.01	0.8
CDC20	Q12834	7	0.78	47	1.04444	0.74	0.01	0.81	3	0.5	47	1.04444	0.48	0	0.82	3	0.5	47	1.04444	0.48	0	0.89
CDC23	Q9UJX2	15	1.67	23	0.511111	3.26	0.16	0.55	9	1.5	23	0.511111	2.93	0.11	0.63	4	0.67	23	0.511111	1.3	0	0.89
CDC25C	P30307
CDC26	Q8NHZ8	4	0.44	8	0.177778	2.5	0	0.89	1	0.17	8	0.177778	0.94	0	0.89	1	0.17	8	0.177778	0.94	0	0.89
CDC27	P30260	24	2.67	88	1.95556	1.36	0.02	0.78	17	2.83	88	1.95556	1.45	0.01	0.79	5	0.83	88	1.95556	0.43	0	0.85
CDC37	Q16543	40	4.44	183	4.06667	1.09	0	0.87	21	3.5	183	4.06667	0.86	0	0.87	31	5.17	183	4.06667	1.27	0	0.86
CDC37L1	Q7L3B6															1	0.17	9	0.2	0.83	0	0.89
CDC40	O60508	4	0.44	20	0.444444	1	0.02	0.77	16	2.67	20	0.444444	6	0.32	0.4	11	1.83	20	0.444444	4.12	0.14	0.57
CDC42	P60953	3	0.33	63	1.4	0.24	0	0.89	7	1.17	63	1.4	0.83	0	0.82	1	0.17	63	1.4	0.12	0	0.89
CDC42BPA	Q5VT25								3	0.5	31	0.688889	0.73	0.02	0.78
CDC42BPB	Q9Y5S2	3	0.33	27	0.6	0.56	0	0.89
CDC42EP4	Q9H3Q1	5	0.56	39	0.866667	0.64	0	0.82	3	0.5	39	0.866667	0.58	0.01	0.81	5	0.83	39	0.866667	0.96	0.01	0.78
CDC45	O75419
CDC5L	Q99459	287	31.89	420	9.33333	3.42	0.34	0.38	212	35.33	420	9.33333	3.79	0.56	0.2	153	25.5	420	9.33333	2.73	0.02	0.77
CDC7	O00311	1	0.11	3	0.0666667	1.11	0	0.89	5	0.83	3	0.0666667	8.33	0.13	0.59	2	0.33	3	0.0666667	3.33	0	0.89
CDC73	Q6P1J9	92	10.22	238	5.28889	1.93	0	0.82	72	12	238	5.28889	2.27	0.01	0.8	50	8.33	238	5.28889	1.58	0	0.86
CDCA2	Q69YH5	28	3.11	50	1.11111	2.8	0.17	0.53	19	3.17	50	1.11111	2.85	0.18	0.53	20	3.33	50	1.11111	3	0.2	0.51
CDCA3	Q99618	1	0.11	33	0.733333	0.15	0	0.89
CDCA5	Q96FF9	5	0.56	37	0.822222	0.68	0	0.89	5	0.83	37	0.822222	1.01	0.02	0.77	16	2.67	37	0.822222	3.24	0.13	0.61
CDCA8	Q53HL2															1	0.17	6	0.133333	1.25	0	0.89
CDH13	P55290	1	0.11	1	0.0222222	1.11	0	0.89
CDIPT	O14735								5	0.83	11	0.244444	3.41	0.12	0.62
CDK1	P06493	27	3	238	5.28889	0.57	0	0.88	17	2.83	238	5.28889	0.54	0	0.89	23	3.83	238	5.28889	0.72	0	0.89
CDK11B	P21127	98	10.89	129	2.86667	3.8	0.47	0.27	70	11.67	129	2.86667	4.07	0.55	0.21	38	6.33	129	2.86667	2.21	0.06	0.7
CDK12	Q9NYV4	155	17.22	198	4.4	3.91	0.48	0.26	104	17.33	198	4.4	3.94	0.49	0.25	68	11.33	198	4.4	2.58	0.1	0.64
CDK13	Q14004	34	3.78	33	0.733333	5.15	0.46	0.27	25	4.17	33	0.733333	5.68	0.54	0.22	12	2	33	0.733333	2.73	0.08	0.67
CDK16	Q00536	3	0.33	33	0.733333	0.45	0	0.89								3	0.5	33	0.733333	0.68	0	0.89
CDK2	P24941	43	4.78	81	1.8	2.65	0.1	0.65	49	8.17	81	1.8	4.54	0.53	0.22	39	6.5	81	1.8	3.61	0.3	0.41
CDK2AP1	O14519	5	0.56	13	0.288889	1.92	0.03	0.74	1	0.17	13	0.288889	0.58	0	0.89	1	0.17	13	0.288889	0.58	0	0.89
CDK4	P11802	18	2	185	4.11111	0.49	0	0.89	23	3.83	185	4.11111	0.93	0	0.86	19	3.17	185	4.11111	0.77	0	0.86
CDK5	Q00535	5	0.56	24	0.533333	1.04	0.01	0.78	5	0.83	24	0.533333	1.56	0.04	0.73	4	0.67	24	0.533333	1.25	0.02	0.77
CDK5RAP3	Q96JB5	1	0.11	71	1.57778	0.07	0	0.89								1	0.17	71	1.57778	0.11	0	0.89
CDK7	P50613	56	6.22	127	2.82222	2.2	0.07	0.68	82	13.67	127	2.82222	4.84	0.81	0.07	52	8.67	127	2.82222	3.07	0.22	0.5
CDK8	P49336	1	0.11	2	0.0444444	1.11	0	0.89	2	0.33	2	0.0444444	3.33	0	0.89
CDK9	P50750	78	8.67	121	2.68889	3.22	0.26	0.44	59	9.83	121	2.68889	3.66	0.36	0.37	39	6.5	121	2.68889	2.42	0.03	0.74
CDKAL1	Q5VV42								1	0.17	16	0.355556	0.47	0	0.89
CDKN1A	P38936	4	0.44	0	0	4.44	0	0.89	1	0.17	0	0	1.67	0	0.89
CDKN1B	P46527	11	1.22	5	0.111111	11	0.33	0.39	6	1	5	0.111111	9	0.24	0.47	6	1	5	0.111111	9	0.24	0.47
CDKN2A	P42771	14	1.56	60	1.33333	1.17	0.01	0.81	14	2.33	60	1.33333	1.75	0.03	0.74	14	2.33	60	1.33333	1.75	0.02	0.77
CDKN2AIP	Q9NXV6	43	4.78	236	5.24444	0.91	0	0.87	31	5.17	236	5.24444	0.99	0	0.88	28	4.67	236	5.24444	0.89	0	0.87
CDKN2AIPNL	Q96HQ2	3	0.33	26	0.577778	0.58	0.01	0.79	5	0.83	26	0.577778	1.44	0.02	0.77	12	2	26	0.577778	3.46	0.18	0.53
CDKN2C	P42773															2	0.33	0	0	3.33	0	0.89
CDO1	Q16878	6	0.67	10	0.222222	3	0	0.89	5	0.83	10	0.222222	3.75	0.15	0.56	3	0.5	10	0.222222	2.25	0	0.89
CDR2L	Q86X02
CDS2	O95674	7	0.78	7	0.155556	5	0.17	0.54
CDT1	Q9H211
CDV3	Q9UKY7	133	14.78	1174	26.0889	0.57	0	0.89	75	12.5	1174	26.0889	0.48	0	0.89	142	23.67	1174	26.0889	0.91	0	0.89
CDYL	Q9Y232	3	0.33	9	0.2	1.67	0.04	0.72	2	0.33	9	0.2	1.67	0	0.89
CEBPB	P17676	1	0.11	0	0	1.11	0	0.89	3	0.5	0	0	5	0	0.89	2	0.33	0	0	3.33	0	0.89
CEBPG	P53567
CEBPZ	Q03701	2	0.22	52	1.15556	0.19	0	0.89								1	0.17	52	1.15556	0.14	0	0.89
CECR2	Q9BXF3	3	0.33	2	0.0444444	3.33	0	0.89	6	1	2	0.0444444	10	0.26	0.45	1	0.17	2	0.0444444	1.67	0	0.89
CELF1	Q92879	4	0.44	134	2.97778	0.15	0	0.89	3	0.5	134	2.97778	0.17	0	0.89	1	0.17	134	2.97778	0.06	0	0.89
CELF2	O95319	3	0.33	34	0.755556	0.44	0.01	0.8	1	0.17	34	0.755556	0.22	0	0.89
CENPC	Q03188
CENPF	P49454
CENPH	Q9H3R5	3	0.33	26	0.577778	0.58	0.01	0.79								1	0.17	26	0.577778	0.29	0	0.89
CENPI	Q92674	1	0.11	0	0	1.11	0	0.89
CENPM	Q9NSP4								1	0.17	0	0	1.67	0	0.89
CENPT	Q96BT3	1	0.11	1	0.0222222	1.11	0	0.89	1	0.17	1	0.0222222	1.67	0	0.89
CENPU	Q71F23	2	0.22	3	0.0666667	2.22	0	0.89	2	0.33	3	0.0666667	3.33	0	0.89	2	0.33	3	0.0666667	3.33	0	0.89
CENPV	Q7Z7K6								1	0.17	6	0.133333	1.25	0	0.89
CEP112	Q8N8E3
CEP120	Q8N960
CEP131	Q9UPN4	6	0.67	73	1.62222	0.41	0	0.89
CEP170	Q5SW79	73	8.11	612	13.6	0.6	0	0.89	17	2.83	612	13.6	0.21	0	0.89	27	4.5	612	13.6	0.33	0	0.89
CEP170B	Q9Y4F5
CEP192	Q8TEP8	4	0.44	123	2.73333	0.16	0	0.89	1	0.17	123	2.73333	0.06	0	0.89	1	0.17	123	2.73333	0.06	0	0.89
CEP350	Q5VT06
CEP41	Q9BYV8	6	0.67	133	2.95556	0.23	0	0.89	2	0.33	133	2.95556	0.11	0	0.89	4	0.67	133	2.95556	0.23	0	0.89
CEP55	Q53EZ4	1	0.11	116	2.57778	0.04	0	0.89
CEP76	Q8TAP6	2	0.22	1	0.0222222	2.22	0	0.89	2	0.33	1	0.0222222	3.33	0.13	0.59
CEP85	Q6P2H3	2	0.22	105	2.33333	0.1	0	0.89	1	0.17	105	2.33333	0.07	0	0.89
CEP97	Q8IW35
CEPT1	Q9Y6K0	2	0.22	3	0.0666667	2.22	0	0.89	2	0.33	3	0.0666667	3.33	0	0.89
CETN2	P41208	3	0.33	212	4.71111	0.07	0	0.89	5	0.83	212	4.71111	0.18	0	0.89	6	1	212	4.71111	0.21	0	0.89
CETN3	O15182
CFAP157	Q5JU67	14	1.56	18	0.4	3.89	0.17	0.53	7	1.17	18	0.4	2.92	0.03	0.74	17	2.83	18	0.4	7.08	0.36	0.37
CFAP20	Q9Y6A4	35	3.89	124	2.75556	1.41	0	0.84	25	4.17	124	2.75556	1.51	0	0.82	16	2.67	124	2.75556	0.97	0	0.86
CFAP298	P57076	5	0.56	61	1.35556	0.41	0	0.84								3	0.5	61	1.35556	0.37	0	0.89
CFAP36	Q96G28	26	2.89	212	4.71111	0.61	0	0.87	15	2.5	212	4.71111	0.53	0	0.89	22	3.67	212	4.71111	0.78	0	0.88
CFAP65	Q6ZU64
CFAP97	Q9P2B7	4	0.44	53	1.17778	0.38	0	0.89
CFDP1	Q9UEE9	55	6.11	261	5.8	1.05	0	0.88	37	6.17	261	5.8	1.06	0	0.88	37	6.17	261	5.8	1.06	0	0.88
CFL1	P23528	33	3.67	331	7.35556	0.5	0	0.89	34	5.67	331	7.35556	0.77	0	0.89	35	5.83	331	7.35556	0.79	0	0.89
CFL2	Q9Y281								2	0.33	9	0.2	1.67	0	0.89
CGGBP1	Q9UFW8								1	0.17	25	0.555556	0.3	0	0.89	4	0.67	25	0.555556	1.2	0	0.89
CGNL1	Q0VF96	1	0.11	1	0.0222222	1.11	0	0.89
CHAF1A	Q13111	27	3	89	1.97778	1.52	0.05	0.71	23	3.83	89	1.97778	1.94	0.04	0.72	18	3	89	1.97778	1.52	0.01	0.78
CHAF1B	Q13112	62	6.89	128	2.84444	2.42	0.14	0.57	52	8.67	128	2.84444	3.05	0.25	0.47	37	6.17	128	2.84444	2.17	0.11	0.63
CHAMP1	Q96JM3	107	11.89	322	7.15556	1.66	0	0.87	84	14	322	7.15556	1.96	0.01	0.8	69	11.5	322	7.15556	1.61	0	0.85
CHCHD2	Q9Y6H1	1	0.11	7	0.155556	0.71	0	0.89
CHCHD3	Q9NX63	2	0.22	21	0.466667	0.48	0	0.89
CHCHD4	Q8N4Q1	1	0.11	8	0.177778	0.62	0	0.89	4	0.67	8	0.177778	3.75	0.09	0.65	4	0.67	8	0.177778	3.75	0.09	0.65
CHD1	O14646	8	0.89	25	0.555556	1.6	0.07	0.69	6	1	25	0.555556	1.8	0.05	0.71	1	0.17	25	0.555556	0.3	0	0.89
CHD1L	Q86WJ1	11	1.22	58	1.28889	0.95	0.01	0.8	17	2.83	58	1.28889	2.2	0.11	0.62	16	2.67	58	1.28889	2.07	0.04	0.72
CHD3	Q12873	23	2.56	16	0.355556	7.19	0.48	0.26	20	3.33	16	0.355556	9.38	0.65	0.15	11	1.83	16	0.355556	5.16	0.22	0.5
CHD4	Q14839	598	66.44	910	20.2222	3.29	0.1	0.64	424	70.67	910	20.2222	3.49	0.24	0.47	276	46	910	20.2222	2.27	0	0.88
CHD5	Q8TDI0															1	0.17	1	0.0222222	1.67	0	0.89
CHD6	Q8TD26	1	0.11	5	0.111111	1	0	0.89	2	0.33	5	0.111111	3	0	0.89	1	0.17	5	0.111111	1.5	0	0.89
CHD7	Q9P2D1	83	9.22	9	0.2	46.11	0.76	0.09	90	15	9	0.2	75	1	0	41	6.83	9	0.2	34.17	0.96	0.01
CHD8	Q9HCK8	232	25.78	207	4.6	5.6	0.81	0.06	183	30.5	207	4.6	6.63	0.87	0.04	93	15.5	207	4.6	3.37	0.25	0.46
CHD9	Q3L8U1	1	0.11	0	0	1.11	0	0.89	1	0.17	0	0	1.67	0	0.89
CHEK1	O14757	2	0.22	18	0.4	0.56	0	0.89	2	0.33	18	0.4	0.83	0	0.89	1	0.17	18	0.4	0.42	0	0.89
CHEK2	O96017	2	0.22	18	0.4	0.56	0	0.89
CHERP	Q8IWX8	127	14.11	310	6.88889	2.05	0	0.83	101	16.83	310	6.88889	2.44	0.01	0.79	57	9.5	310	6.88889	1.38	0	0.88
CHFR	Q96EP1	1	0.11	1	0.0222222	1.11	0	0.89								5	0.83	1	0.0222222	8.33	0.26	0.45
CHKA	P35790	3	0.33	11	0.244444	1.36	0	0.89	2	0.33	11	0.244444	1.36	0	0.89	1	0.17	11	0.244444	0.68	0	0.89
CHKB	Q9Y259
CHMP1A	Q9HD42	1	0.11	11	0.244444	0.45	0	0.89
CHMP2A	O43633															1	0.17	11	0.244444	0.68	0	0.89
CHMP2B	Q9UQN3	16	1.78	137	3.04444	0.58	0	0.86	7	1.17	137	3.04444	0.38	0	0.89	9	1.5	137	3.04444	0.49	0	0.89
CHMP3	Q9Y3E7
CHMP4A	Q9BY43	1	0.11	120	2.66667	0.04	0	0.89								3	0.5	120	2.66667	0.19	0	0.89
CHMP4B	Q9H444	41	4.56	439	9.75556	0.47	0	0.89	35	5.83	439	9.75556	0.6	0	0.89	39	6.5	439	9.75556	0.67	0	0.89
CHMP4C	Q96CF2
CHMP5	Q9NZZ3	49	5.44	146	3.24444	1.68	0	0.82	31	5.17	146	3.24444	1.59	0.01	0.79	40	6.67	146	3.24444	2.05	0.02	0.77
CHMP6	Q96FZ7	1	0.11	10	0.222222	0.5	0	0.89
CHN2	P52757	8	0.89	60	1.33333	0.67	0	0.83	4	0.67	60	1.33333	0.5	0	0.83
CHORDC1	Q9UHD1	61	6.78	1515	33.6667	0.2	0	0.89	33	5.5	1515	33.6667	0.16	0	0.89	43	7.17	1515	33.6667	0.21	0	0.89
CHRAC1	Q9NRG0	3	0.33	22	0.488889	0.68	0	0.89	5	0.83	22	0.488889	1.7	0	0.89	1	0.17	22	0.488889	0.34	0	0.89
CHRM2	P08172
CHTF18	Q8WVB6	11	1.22	4	0.0888889	12.22	0.34	0.38	8	1.33	4	0.0888889	13.33	0.42	0.31	8	1.33	4	0.0888889	13.33	0.29	0.42
CHTOP	Q9Y3Y2	20	2.22	44	0.977778	2.27	0.13	0.58	22	3.67	44	0.977778	3.75	0.22	0.49	15	2.5	44	0.977778	2.56	0.18	0.53
CHUK	O15111								1	0.17	16	0.355556	0.47	0	0.89
CIAO3	Q9H6Q4															1	0.17	7	0.155556	1.07	0	0.89
CIAPIN1	Q6FI81	70	7.78	396	8.8	0.88	0	0.87	31	5.17	396	8.8	0.59	0	0.89	39	6.5	396	8.8	0.74	0	0.89
CIC	Q96RK0	33	3.67	18	0.4	9.17	0.45	0.29	31	5.17	18	0.4	12.92	0.67	0.14	19	3.17	18	0.4	7.92	0.5	0.24
CIITA	P33076	1	0.11	0	0	1.11	0	0.89
CIP2A	Q8TCG1	14	1.56	13	0.288889	5.38	0.22	0.49								3	0.5	13	0.288889	1.73	0	0.89
CIR1	Q86X95															1	0.17	0	0	1.67	0	0.89
CIRBP	Q14011	4	0.44	56	1.24444	0.36	0	0.84	12	2	56	1.24444	1.61	0.03	0.74	5	0.83	56	1.24444	0.67	0	0.83
CISD2	Q8N5K1	9	1	19	0.422222	2.37	0.07	0.68	3	0.5	19	0.422222	1.18	0.04	0.73
CIT	O14578															1	0.17	1	0.0222222	1.67	0	0.89
CITED1	Q99966	2	0.22	12	0.266667	0.83	0	0.89	2	0.33	12	0.266667	1.25	0	0.89	3	0.5	12	0.266667	1.88	0	0.89
CIZ1	Q9ULV3	65	7.22	43	0.955556	7.56	0.68	0.13	38	6.33	43	0.955556	6.63	0.65	0.15	32	5.33	43	0.955556	5.58	0.45	0.28
CKAP2	Q8WWK9	5	0.56	158	3.51111	0.16	0	0.89	2	0.33	158	3.51111	0.09	0	0.89	5	0.83	158	3.51111	0.24	0	0.89
CKAP4	Q07065	67	7.44	414	9.2	0.81	0	0.89	39	6.5	414	9.2	0.71	0	0.89	19	3.17	414	9.2	0.34	0	0.89
CKAP5	Q14008	252	28	1136	25.2444	1.11	0	0.89	64	10.67	1136	25.2444	0.42	0	0.89	69	11.5	1136	25.2444	0.46	0	0.89
CKB	P12277	23	2.56	352	7.82222	0.33	0	0.89	23	3.83	352	7.82222	0.49	0	0.89	30	5	352	7.82222	0.64	0	0.89
CKS1B	P61024	2	0.22	41	0.911111	0.24	0	0.89								4	0.67	41	0.911111	0.73	0.01	0.78
CLASP1	Q7Z460	3	0.33	35	0.777778	0.43	0	0.89	3	0.5	35	0.777778	0.64	0	0.89	3	0.5	35	0.777778	0.64	0.01	0.8
CLASP2	O75122	3	0.33	46	1.02222	0.33	0	0.89
CLASRP	Q8N2M8	16	1.78	25	0.555556	3.2	0.13	0.58	9	1.5	25	0.555556	2.7	0.06	0.7	4	0.67	25	0.555556	1.2	0.02	0.77
CLCC1	Q96S66	4	0.44	199	4.42222	0.1	0	0.89	5	0.83	199	4.42222	0.19	0	0.89	6	1	199	4.42222	0.23	0	0.89
CLCN7	P51798
CLEC16A	Q2KHT3	3	0.33	83	1.84444	0.18	0	0.89	2	0.33	83	1.84444	0.18	0	0.89	3	0.5	83	1.84444	0.27	0	0.89
CLIC1	O00299	32	3.56	174	3.86667	0.92	0	0.86	25	4.17	174	3.86667	1.08	0	0.84	29	4.83	174	3.86667	1.25	0	0.86
CLIC4	Q9Y696	4	0.44	178	3.95556	0.11	0	0.89	2	0.33	178	3.95556	0.08	0	0.89	7	1.17	178	3.95556	0.29	0	0.89
CLINT1	Q14677	171	19	792	17.6	1.08	0	0.89	58	9.67	792	17.6	0.55	0	0.89	83	13.83	792	17.6	0.79	0	0.89
CLIP1	P30622								1	0.17	19	0.422222	0.39	0	0.89	2	0.33	19	0.422222	0.79	0	0.89
CLMN	Q96JQ2	2	0.22	43	0.955556	0.23	0.01	0.81	1	0.17	43	0.955556	0.17	0	0.89	1	0.17	43	0.955556	0.17	0	0.89
CLNS1A	P54105	41	4.56	132	2.93333	1.55	0.01	0.8	22	3.67	132	2.93333	1.25	0	0.83	25	4.17	132	2.93333	1.42	0.01	0.78
CLOCK	O15516															3	0.5	1	0.0222222	5	0	0.89
CLP1	Q92989	17	1.89	35	0.777778	2.43	0.13	0.58	13	2.17	35	0.777778	2.79	0.15	0.56	3	0.5	35	0.777778	0.64	0	0.89
CLPB	Q9H078
CLPTM1	O96005	3	0.33	24	0.533333	0.62	0	0.89	6	1	24	0.533333	1.88	0.04	0.73	4	0.67	24	0.533333	1.25	0.02	0.77
CLPTM1L	Q96KA5
CLSPN	Q9HAW4	9	1	22	0.488889	2.05	0.06	0.7	14	2.33	22	0.488889	4.77	0.23	0.48	7	1.17	22	0.488889	2.39	0.08	0.66
CLTC	Q00610	31	3.44	503	11.1778	0.31	0	0.89	16	2.67	503	11.1778	0.24	0	0.89	10	1.67	503	11.1778	0.15	0	0.89
CLUH	O75153	6	0.67	161	3.57778	0.19	0	0.89	4	0.67	161	3.57778	0.19	0	0.89	4	0.67	161	3.57778	0.19	0	0.89
CMAS	Q8NFW8	9	1	46	1.02222	0.98	0	0.83	8	1.33	46	1.02222	1.3	0.04	0.72	23	3.83	46	1.02222	3.75	0.32	0.39
CMPK1	P30085								2	0.33	87	1.93333	0.17	0	0.89	2	0.33	87	1.93333	0.17	0	0.89
CMSS1	Q9BQ75															3	0.5	6	0.133333	3.75	0	0.89
CMTR1	Q8N1G2	108	12	350	7.77778	1.54	0	0.87	89	14.83	350	7.77778	1.91	0	0.87	97	16.17	350	7.77778	2.08	0	0.85
CMYA5	Q8N3K9	1	0.11	13	0.288889	0.38	0	0.89								1	0.17	13	0.288889	0.58	0	0.89
CNDP2	Q96KP4								2	0.33	53	1.17778	0.28	0	0.89
CNIH4	Q9P003	11	1.22	22	0.488889	2.5	0.08	0.67	15	2.5	22	0.488889	5.11	0.3	0.41	9	1.5	22	0.488889	3.07	0.07	0.68
CNN2	Q99439	1	0.11	93	2.06667	0.05	0	0.89	7	1.17	93	2.06667	0.56	0	0.89	9	1.5	93	2.06667	0.73	0	0.85
CNN3	Q15417	175	19.44	1626	36.1333	0.54	0	0.89	176	29.33	1626	36.1333	0.81	0	0.89	236	39.33	1626	36.1333	1.09	0	0.89
CNOT1	A5YKK6	9	1	332	7.37778	0.14	0	0.89	1	0.17	332	7.37778	0.02	0	0.89
CNOT10	Q9H9A5
CNOT11	Q9UKZ1	12	1.33	49	1.08889	1.22	0.01	0.79	3	0.5	49	1.08889	0.46	0	0.89	6	1	49	1.08889	0.92	0	0.89
CNOT2	Q9NZN8	3	0.33	60	1.33333	0.25	0	0.89
CNOT3	O75175	1	0.11	46	1.02222	0.11	0	0.89								1	0.17	46	1.02222	0.16	0	0.89
CNOT7	Q9UIV1
CNOT9	Q92600	1	0.11	68	1.51111	0.07	0	0.89
CNP	P09543	22	2.44	82	1.82222	1.34	0.01	0.82	18	3	82	1.82222	1.65	0.01	0.8	20	3.33	82	1.82222	1.83	0.03	0.74
COASY	Q13057															7	1.17	99	2.2	0.53	0	0.89
COBL	O75128	1	0.11	62	1.37778	0.08	0	0.89	1	0.17	62	1.37778	0.12	0	0.89	2	0.33	62	1.37778	0.24	0	0.89
COBLL1	Q53SF7	2	0.22	43	0.955556	0.23	0	0.89	1	0.17	43	0.955556	0.17	0	0.89
COG4	Q9H9E3	1	0.11	11	0.244444	0.45	0	0.89								1	0.17	11	0.244444	0.68	0	0.89
COIL	P38432	10	1.11	118	2.62222	0.42	0	0.89	15	2.5	118	2.62222	0.95	0	0.85	9	1.5	118	2.62222	0.57	0	0.89
COL25A1	Q9BXS0	3	0.33	1	0.0222222	3.33	0	0.89
COL2A1	P02458															2	0.33	9	0.2	1.67	0	0.89
COL4A6	Q14031	2	0.22	0	0	2.22	0	0.89
COMMD1	Q8N668	8	0.89	7	0.155556	5.71	0.13	0.58	2	0.33	7	0.155556	2.14	0	0.89	1	0.17	7	0.155556	1.07	0	0.89
COMMD3	Q9UBI1
COMMD4	Q9H0A8	10	1.11	23	0.511111	2.17	0.04	0.72	10	1.67	23	0.511111	3.26	0.12	0.61	8	1.33	23	0.511111	2.61	0.08	0.66
COMMD6	Q7Z4G1	7	0.78	8	0.177778	4.38	0.06	0.7	3	0.5	8	0.177778	2.81	0.09	0.65	3	0.5	8	0.177778	2.81	0	0.89
COMMD8	Q9NX08	22	2.44	54	1.2	2.04	0.1	0.64	18	3	54	1.2	2.5	0.08	0.67	15	2.5	54	1.2	2.08	0.04	0.73
COMMD9	Q9P000	14	1.56	76	1.68889	0.92	0	0.82	8	1.33	76	1.68889	0.79	0	0.85	9	1.5	76	1.68889	0.89	0	0.84
COPA	P53621	67	7.44	426	9.46667	0.79	0	0.89	37	6.17	426	9.46667	0.65	0	0.89	27	4.5	426	9.46667	0.48	0	0.89
COPB1	P53618	66	7.33	337	7.48889	0.98	0	0.88	21	3.5	337	7.48889	0.47	0	0.89	20	3.33	337	7.48889	0.45	0	0.89
COPB2	P35606	41	4.56	307	6.82222	0.67	0	0.88	11	1.83	307	6.82222	0.27	0	0.89	7	1.17	307	6.82222	0.17	0	0.89
COPE	O14579	16	1.78	103	2.28889	0.78	0.01	0.82	16	2.67	103	2.28889	1.17	0	0.83	11	1.83	103	2.28889	0.8	0	0.84
COPG1	Q9Y678	10	1.11	93	2.06667	0.54	0	0.89	4	0.67	93	2.06667	0.32	0	0.89	1	0.17	93	2.06667	0.08	0	0.89
COPG2	Q9UBF2	146	16.22	310	6.88889	2.35	0.07	0.68	40	6.67	310	6.88889	0.97	0	0.88	44	7.33	310	6.88889	1.06	0	0.88
COPRS	Q9NQ92	15	1.67	64	1.42222	1.17	0.01	0.8	9	1.5	64	1.42222	1.05	0	0.82	10	1.67	64	1.42222	1.17	0.01	0.8
COPS2	P61201	18	2	117	2.6	0.77	0	0.84	16	2.67	117	2.6	1.03	0	0.85	6	1	117	2.6	0.38	0	0.89
COPS3	Q9UNS2	40	4.44	337	7.48889	0.59	0	0.89	37	6.17	337	7.48889	0.82	0	0.88	46	7.67	337	7.48889	1.02	0	0.87
COPS4	Q9BT78	46	5.11	169	3.75556	1.36	0	0.85	33	5.5	169	3.75556	1.46	0	0.84	32	5.33	169	3.75556	1.42	0	0.85
COPS5	Q92905	34	3.78	170	3.77778	1	0	0.86	20	3.33	170	3.77778	0.88	0	0.87	16	2.67	170	3.77778	0.71	0	0.87
COPS6	Q7L5N1	24	2.67	140	3.11111	0.86	0	0.85	10	1.67	140	3.11111	0.54	0	0.89	6	1	140	3.11111	0.32	0	0.89
COPS7A	Q9UBW8	13	1.44	59	1.31111	1.1	0.01	0.81	8	1.33	59	1.31111	1.02	0.01	0.8	1	0.17	59	1.31111	0.13	0	0.89
COPS7B	Q9H9Q2	12	1.33	66	1.46667	0.91	0	0.82	12	2	66	1.46667	1.36	0.01	0.79	5	0.83	66	1.46667	0.57	0	0.83
COPS8	Q99627	24	2.67	163	3.62222	0.74	0	0.87	19	3.17	163	3.62222	0.87	0	0.87	19	3.17	163	3.62222	0.87	0	0.87
COPS9	Q8WXC6	7	0.78	67	1.48889	0.52	0	0.85	11	1.83	67	1.48889	1.23	0.01	0.8	12	2	67	1.48889	1.34	0.03	0.74
COPZ1	P61923	15	1.67	203	4.51111	0.37	0	0.89	3	0.5	203	4.51111	0.11	0	0.89	11	1.83	203	4.51111	0.41	0	0.89
COQ6	Q9Y2Z9	4	0.44	22	0.488889	0.91	0.04	0.73	3	0.5	22	0.488889	1.02	0	0.89	2	0.33	22	0.488889	0.68	0.03	0.75
CORO1A	P31146	6	0.67	9	0.2	3.33	0.05	0.72	3	0.5	9	0.2	2.5	0	0.89	3	0.5	9	0.2	2.5	0	0.89
CORO1B	Q9BR76	428	47.56	871	19.3556	2.46	0.01	0.8	240	40	871	19.3556	2.07	0	0.88	280	46.67	871	19.3556	2.41	0	0.87
CORO1C	Q9ULV4	116	12.89	368	8.17778	1.58	0	0.87	59	9.83	368	8.17778	1.2	0	0.88	75	12.5	368	8.17778	1.53	0	0.87
CORO7	P57737	22	2.44	164	3.64444	0.67	0	0.86	14	2.33	164	3.64444	0.64	0	0.89	21	3.5	164	3.64444	0.96	0	0.86
COX17	Q14061	6	0.67	12	0.266667	2.5	0	0.89	6	1	12	0.266667	3.75	0.05	0.7	4	0.67	12	0.266667	2.5	0.05	0.7
COX4I1	P13073	1	0.11	16	0.355556	0.31	0	0.89	2	0.33	16	0.355556	0.94	0	0.89
COX5A	P20674	2	0.22	9	0.2	1.11	0	0.89								1	0.17	9	0.2	0.83	0	0.89
COX6A1	P12074	1	0.11	1	0.0222222	1.11	0	0.89
COX7A2	P14406	1	0.11	3	0.0666667	1.11	0	0.89	2	0.33	3	0.0666667	3.33	0	0.89
CPD	O75976	1	0.11	35	0.777778	0.14	0	0.89
CPEB4	Q17RY0
CPLX1	O14810	11	1.22	24	0.533333	2.29	0.14	0.57	5	0.83	24	0.533333	1.56	0.02	0.76	10	1.67	24	0.533333	3.12	0.14	0.58
CPNE1	Q99829	5	0.56	167	3.71111	0.15	0	0.89	7	1.17	167	3.71111	0.31	0	0.89	4	0.67	167	3.71111	0.18	0	0.89
CPNE3	O75131	13	1.44	118	2.62222	0.55	0	0.85	4	0.67	118	2.62222	0.25	0	0.89	5	0.83	118	2.62222	0.32	0	0.89
CPNE8	Q86YQ8															2	0.33	16	0.355556	0.94	0	0.89
CPSF1	Q10570	159	17.67	354	7.86667	2.25	0.13	0.58	123	20.5	354	7.86667	2.61	0.05	0.71	71	11.83	354	7.86667	1.5	0	0.87
CPSF2	Q9P2I0	66	7.33	171	3.8	1.93	0.01	0.79	41	6.83	171	3.8	1.8	0.01	0.8	25	4.17	171	3.8	1.1	0	0.85
CPSF3	Q9UKF6	106	11.78	287	6.37778	1.85	0	0.85	66	11	287	6.37778	1.72	0	0.86	61	10.17	287	6.37778	1.59	0	0.86
CPSF4	O95639	54	6	99	2.2	2.73	0.34	0.38	35	5.83	99	2.2	2.65	0.12	0.62	21	3.5	99	2.2	1.59	0	0.82
CPSF6	Q16630	169	18.78	399	8.86667	2.12	0	0.84	172	28.67	399	8.86667	3.23	0.2	0.51	136	22.67	399	8.86667	2.56	0.01	0.81
CPSF7	Q8N684	63	7	273	6.06667	1.15	0	0.87	59	9.83	273	6.06667	1.62	0	0.86	75	12.5	273	6.06667	2.06	0.01	0.8
CPVL	Q9H3G5	12	1.33	28	0.622222	2.14	0.03	0.74	8	1.33	28	0.622222	2.14	0.05	0.71	8	1.33	28	0.622222	2.14	0.12	0.61
CRABP2	P29373
CRACD	Q6ZU35
CRAMP1	Q96RY5	1	0.11	1	0.0222222	1.11	0	0.89	1	0.17	1	0.0222222	1.67	0	0.89	1	0.17	1	0.0222222	1.67	0	0.89
CRB1	P82279	2	0.22	2	0.0444444	2.22	0	0.89	1	0.17	2	0.0444444	1.67	0	0.89	1	0.17	2	0.0444444	1.67	0	0.89
CRCP	O75575								1	0.17	21	0.466667	0.36	0	0.89	1	0.17	21	0.466667	0.36	0	0.89
CREB1	P16220	11	1.22	15	0.333333	3.67	0.15	0.57	11	1.83	15	0.333333	5.5	0.25	0.46	14	2.33	15	0.333333	7	0.33	0.39
CREB5	Q02930	1	0.11	2	0.0444444	1.11	0	0.89	3	0.5	2	0.0444444	5	0	0.89	9	1.5	2	0.0444444	15	0.51	0.23
CREBBP	Q92793	21	2.33	33	0.733333	3.18	0.16	0.55	24	4	33	0.733333	5.45	0.52	0.23	15	2.5	33	0.733333	3.41	0.14	0.58
CREBZF	Q9NS37															2	0.33	0	0	3.33	0	0.89
CREM	Q03060	4	0.44	11	0.244444	1.82	0.04	0.73	9	1.5	11	0.244444	6.14	0.18	0.53	11	1.83	11	0.244444	7.5	0.3	0.41
CRK	P46108	142	15.78	233	5.17778	3.05	0.25	0.46	120	20	233	5.17778	3.86	0.4	0.32	148	24.67	233	5.17778	4.76	0.62	0.17
CRKL	P46109	196	21.78	781	17.3556	1.25	0	0.89	122	20.33	781	17.3556	1.17	0	0.89	142	23.67	781	17.3556	1.36	0	0.89
CRNKL1	Q9BZJ0	88	9.78	126	2.8	3.49	0.28	0.43	46	7.67	126	2.8	2.74	0.11	0.63	40	6.67	126	2.8	2.38	0.05	0.71
CROCC	Q5TZA2	3	0.33	14	0.311111	1.07	0	0.89								2	0.33	14	0.311111	1.07	0	0.89
CRTAP	O75718								2	0.33	3	0.0666667	3.33	0	0.89
CRTC1	Q6UUV9	9	1	57	1.26667	0.79	0.01	0.81	1	0.17	57	1.26667	0.13	0	0.89	1	0.17	57	1.26667	0.13	0	0.89
CRTC2	Q53ET0	11	1.22	45	1	1.22	0.02	0.76	8	1.33	45	1	1.33	0.03	0.74	12	2	45	1	2	0.09	0.66
CRTC3	Q6UUV7	5	0.56	13	0.288889	1.92	0.03	0.74	5	0.83	13	0.288889	2.88	0.05	0.71	8	1.33	13	0.288889	4.62	0.21	0.5
CRYBG3	Q68DQ2	20	2.22	177	3.93333	0.56	0	0.87	22	3.67	177	3.93333	0.93	0	0.86	19	3.17	177	3.93333	0.81	0	0.83
CS	O75390	13	1.44	22	0.488889	2.95	0.18	0.53	11	1.83	22	0.488889	3.75	0.2	0.51	5	0.83	22	0.488889	1.7	0.05	0.71
CSDE1	O75534	228	25.33	1278	28.4	0.89	0	0.89	72	12	1278	28.4	0.42	0	0.89	110	18.33	1278	28.4	0.65	0	0.89
CSE1L	P55060	17	1.89	421	9.35556	0.2	0	0.89	27	4.5	421	9.35556	0.48	0	0.89	8	1.33	421	9.35556	0.14	0	0.89
CSK	P41240	4	0.44	161	3.57778	0.12	0	0.89								1	0.17	161	3.57778	0.05	0	0.89
CSNK1A1	P48729	34	3.78	334	7.42222	0.51	0	0.89	23	3.83	334	7.42222	0.52	0	0.89	25	4.17	334	7.42222	0.56	0	0.89
CSNK1D	P48730	2	0.22	16	0.355556	0.62	0	0.89	1	0.17	16	0.355556	0.47	0	0.89	4	0.67	16	0.355556	1.87	0	0.89
CSNK1E	P49674	8	0.89	36	0.8	1.11	0.01	0.79	4	0.67	36	0.8	0.83	0.01	0.8	4	0.67	36	0.8	0.83	0	0.89
CSNK2A1	P68400	73	8.11	456	10.1333	0.8	0	0.89	89	14.83	456	10.1333	1.46	0	0.88	98	16.33	456	10.1333	1.61	0	0.87
CSNK2A2	P19784	39	4.33	215	4.77778	0.91	0	0.87	43	7.17	215	4.77778	1.5	0	0.86	30	5	215	4.77778	1.05	0	0.87
CSNK2B	P67870	30	3.33	100	2.22222	1.5	0.01	0.81	20	3.33	100	2.22222	1.5	0.01	0.81	19	3.17	100	2.22222	1.42	0	0.82
CSRP1	P21291	18	2	219	4.86667	0.41	0	0.89	7	1.17	219	4.86667	0.24	0	0.89	14	2.33	219	4.86667	0.48	0	0.89
CSRP2	Q16527	16	1.78	169	3.75556	0.47	0	0.89	14	2.33	169	3.75556	0.62	0	0.87	13	2.17	169	3.75556	0.58	0	0.88
CSTB	P04080	4	0.44	39	0.866667	0.51	0	0.82
CSTF1	Q05048	26	2.89	70	1.55556	1.86	0.05	0.71	29	4.83	70	1.55556	3.11	0.15	0.57	19	3.17	70	1.55556	2.04	0.05	0.72
CSTF2	P33240	49	5.44	68	1.51111	3.6	0.22	0.49	33	5.5	68	1.51111	3.64	0.22	0.49	30	5	68	1.51111	3.31	0.17	0.54
CSTF2T	Q9H0L4	31	3.44	79	1.75556	1.96	0.04	0.73	26	4.33	79	1.75556	2.47	0.09	0.66	30	5	79	1.75556	2.85	0.11	0.62
CSTF3	Q12996	99	11	178	3.95556	2.78	0.13	0.61	74	12.33	178	3.95556	3.12	0.16	0.55	35	5.83	178	3.95556	1.47	0	0.82
CTBP1	Q13363	3	0.33	23	0.511111	0.65	0.01	0.78	1	0.17	23	0.511111	0.33	0	0.89	2	0.33	23	0.511111	0.65	0	0.89
CTBP2	P56545	2	0.22	127	2.82222	0.08	0	0.89	7	1.17	127	2.82222	0.41	0	0.89	4	0.67	127	2.82222	0.24	0	0.89
CTCF	P49711	12	1.33	42	0.933333	1.43	0.04	0.72	16	2.67	42	0.933333	2.86	0.16	0.56	21	3.5	42	0.933333	3.75	0.22	0.49
CTDP1	Q9Y5B0	18	2	62	1.37778	1.45	0.02	0.78	14	2.33	62	1.37778	1.69	0.03	0.74	10	1.67	62	1.37778	1.21	0.01	0.8
CTDSPL2	Q05D32	2	0.22	8	0.177778	1.25	0	0.89	4	0.67	8	0.177778	3.75	0	0.89	5	0.83	8	0.177778	4.69	0.09	0.65
CTIF	O43310	3	0.33	66	1.46667	0.23	0	0.89								1	0.17	66	1.46667	0.11	0	0.89
CTNNA1	P35221	1	0.11	72	1.6	0.07	0	0.89
CTNNB1	P35222															1	0.17	6	0.133333	1.25	0	0.89
CTNNBIP1	Q9NSA3	3	0.33	10	0.222222	1.5	0	0.89	4	0.67	10	0.222222	3	0	0.89	9	1.5	10	0.222222	6.75	0.26	0.44
CTNNBL1	Q8WYA6	91	10.11	119	2.64444	3.82	0.4	0.33	89	14.83	119	2.64444	5.61	0.83	0.05	64	10.67	119	2.64444	4.03	0.43	0.3
CTNND1	O60716	33	3.67	464	10.3111	0.36	0	0.89	7	1.17	464	10.3111	0.11	0	0.89	26	4.33	464	10.3111	0.42	0	0.89
CTPS1	P17812	91	10.11	640	14.2222	0.71	0	0.89	56	9.33	640	14.2222	0.66	0	0.89	66	11	640	14.2222	0.77	0	0.89
CTR9	Q6PD62	38	4.22	40	0.888889	4.75	0.36	0.36	31	5.17	40	0.888889	5.81	0.51	0.24	10	1.67	40	0.888889	1.88	0.04	0.73
CTSD	P07339								1	0.17	16	0.355556	0.47	0	0.89
CTTN	Q14247	299	33.22	2429	53.9778	0.62	0	0.89	105	17.5	2429	53.9778	0.32	0	0.89	133	22.17	2429	53.9778	0.41	0	0.89
CTTNBP2NL	Q9P2B4	7	0.78	99	2.2	0.35	0	0.89	1	0.17	99	2.2	0.08	0	0.89	4	0.67	99	2.2	0.3	0	0.89
CTU1	Q7Z7A3	1	0.11	1	0.0222222	1.11	0	0.89	1	0.17	1	0.0222222	1.67	0	0.89	1	0.17	1	0.0222222	1.67	0	0.89
CUEDC2	Q9H467	16	1.78	107	2.37778	0.75	0	0.86	15	2.5	107	2.37778	1.05	0	0.85	16	2.67	107	2.37778	1.12	0	0.84
CUL1	Q13616	31	3.44	137	3.04444	1.13	0	0.85	28	4.67	137	3.04444	1.53	0	0.82	15	2.5	137	3.04444	0.82	0	0.86
CUL2	Q13617	17	1.89	82	1.82222	1.04	0.04	0.73	10	1.67	82	1.82222	0.91	0	0.84	11	1.83	82	1.82222	1.01	0	0.83
CUL3	Q13618	44	4.89	241	5.35556	0.91	0	0.88	54	9	241	5.35556	1.68	0	0.86	25	4.17	241	5.35556	0.78	0	0.88
CUL4A	Q13619	9	1	32	0.711111	1.41	0.02	0.76	1	0.17	32	0.711111	0.23	0	0.89	3	0.5	32	0.711111	0.7	0	0.89
CUL4B	Q13620	116	12.89	451	10.0222	1.29	0	0.88	93	15.5	451	10.0222	1.55	0	0.88	91	15.17	451	10.0222	1.51	0	0.88
CUL5	Q93034	16	1.78	138	3.06667	0.58	0	0.89	15	2.5	138	3.06667	0.82	0	0.84	4	0.67	138	3.06667	0.22	0	0.89
CUSTOS	Q96C57	7	0.78	102	2.26667	0.34	0	0.89	3	0.5	102	2.26667	0.22	0	0.89	2	0.33	102	2.26667	0.15	0	0.89
CUTA	O60888	2	0.22	42	0.933333	0.24	0	0.89
CUTC	Q9NTM9	5	0.56	61	1.35556	0.41	0	0.89	3	0.5	61	1.35556	0.37	0	0.89	6	1	61	1.35556	0.74	0	0.82
CUX1	P39880	31	3.44	38	0.844444	4.08	0.3	0.41	29	4.83	38	0.844444	5.72	0.46	0.28	8	1.33	38	0.844444	1.58	0.03	0.74
CWC15	Q9P013	81	9	144	3.2	2.81	0.19	0.52	48	8	144	3.2	2.5	0.05	0.71	49	8.17	144	3.2	2.55	0.04	0.72
CWC22	Q9HCG8	42	4.67	124	2.75556	1.69	0.02	0.78	26	4.33	124	2.75556	1.57	0.01	0.81	16	2.67	124	2.75556	0.97	0	0.84
CWC25	Q9NXE8	7	0.78	17	0.377778	2.06	0	0.89	4	0.67	17	0.377778	1.76	0.04	0.73	5	0.83	17	0.377778	2.21	0.09	0.65
CWC27	Q6UX04	84	9.33	381	8.46667	1.1	0	0.88	67	11.17	381	8.46667	1.32	0	0.88	84	14	381	8.46667	1.65	0	0.86
CWF19L1	Q69YN2	57	6.33	341	7.57778	0.84	0	0.88	40	6.67	341	7.57778	0.88	0	0.88	44	7.33	341	7.57778	0.97	0	0.88
CWF19L2	Q2TBE0	80	8.89	105	2.33333	3.81	0.33	0.38	58	9.67	105	2.33333	4.14	0.35	0.37	37	6.17	105	2.33333	2.64	0.09	0.66
CXADR	P78310
CXorf56	Q9H5V9	136	15.11	205	4.55556	3.32	0.23	0.48	93	15.5	205	4.55556	3.4	0.33	0.39	81	13.5	205	4.55556	2.96	0.15	0.57
CXXC1	Q9P0U4	16	1.78	36	0.8	2.22	0.09	0.65	6	1	36	0.8	1.25	0.05	0.71	1	0.17	36	0.8	0.21	0	0.89
CYB5B	O43169	4	0.44	48	1.06667	0.42	0	0.83
CYB5R3	P00387	20	2.22	116	2.57778	0.86	0	0.86	12	2	116	2.57778	0.78	0	0.85	8	1.33	116	2.57778	0.52	0	0.89
CYB5R4	Q7L1T6	1	0.11	41	0.911111	0.12	0	0.89	3	0.5	41	0.911111	0.55	0	0.89	9	1.5	41	0.911111	1.65	0.02	0.76
CYCS	P99999	4	0.44	23	0.511111	0.87	0.02	0.77	4	0.67	23	0.511111	1.3	0.03	0.75	2	0.33	23	0.511111	0.65	0	0.89
CYFIP1	Q7L576	14	1.56	96	2.13333	0.73	0	0.86	3	0.5	96	2.13333	0.23	0	0.89	1	0.17	96	2.13333	0.08	0	0.89
CYFIP2	Q96F07	31	3.44	290	6.44444	0.53	0	0.89	5	0.83	290	6.44444	0.13	0	0.89	5	0.83	290	6.44444	0.13	0	0.89
CYLD	Q9NQC7	1	0.11	53	1.17778	0.09	0	0.89								1	0.17	53	1.17778	0.14	0	0.89
CYP51A1	Q16850
CYP8B1	Q9UNU6
CZIB	Q9NWV4	3	0.33	348	7.73333	0.04	0	0.89								4	0.67	348	7.73333	0.09	0	0.89
DAB2	P98082
DACH1	Q9UI36								4	0.67	3	0.0666667	6.67	0.13	0.59
DAD1	P61803
DAG1	Q14118
DAP	P51397															3	0.5	19	0.422222	1.18	0	0.89
DAP3	P51398	1	0.11	16	0.355556	0.31	0	0.89	8	1.33	16	0.355556	3.75	0.12	0.62	2	0.33	16	0.355556	0.94	0	0.89
DAPK3	O43293	8	0.89	47	1.04444	0.85	0.01	0.8
DARS1	P14868	29	3.22	205	4.55556	0.71	0	0.87	6	1	205	4.55556	0.22	0	0.89	3	0.5	205	4.55556	0.11	0	0.89
DAXX	Q9UER7	8	0.89	14	0.311111	2.86	0.09	0.65	10	1.67	14	0.311111	5.36	0.39	0.34	9	1.5	14	0.311111	4.82	0.21	0.5
DAZAP1	Q96EP5	3	0.33	69	1.53333	0.22	0	0.89	1	0.17	69	1.53333	0.11	0	0.89	4	0.67	69	1.53333	0.43	0	0.89
DBN1	Q16643	8	0.89	251	5.57778	0.16	0	0.89	3	0.5	251	5.57778	0.09	0	0.89
DBNL	Q9UJU6	54	6	605	13.4444	0.45	0	0.89	16	2.67	605	13.4444	0.2	0	0.89	34	5.67	605	13.4444	0.42	0	0.89
DBR1	Q9UK59	20	2.22	115	2.55556	0.87	0	0.83	11	1.83	115	2.55556	0.72	0	0.85	16	2.67	115	2.55556	1.04	0	0.83
DBT	P11182	2	0.22	288	6.4	0.03	0	0.89
DCAF1	Q9Y4B6	9	1	12	0.266667	3.75	0.07	0.68	3	0.5	12	0.266667	1.88	0	0.89	1	0.17	12	0.266667	0.62	0	0.89
DCAF10	Q5QP82	2	0.22	3	0.0666667	2.22	0	0.89	2	0.33	3	0.0666667	3.33	0	0.89	1	0.17	3	0.0666667	1.67	0	0.89
DCAF11	Q8TEB1	1	0.11	4	0.0888889	1.11	0	0.89
DCAF5	Q96JK2	1	0.11	4	0.0888889	1.11	0	0.89	1	0.17	4	0.0888889	1.67	0	0.89	2	0.33	4	0.0888889	3.33	0	0.89
DCAF7	P61962	26	2.89	183	4.06667	0.71	0	0.89	16	2.67	183	4.06667	0.66	0	0.89	10	1.67	183	4.06667	0.41	0	0.89
DCAF8	Q5TAQ9
DCLRE1A	Q6PJP8								3	0.5	5	0.111111	4.5	0	0.89
DCP1A	Q9NPI6	23	2.56	314	6.97778	0.37	0	0.89	7	1.17	314	6.97778	0.17	0	0.89	12	2	314	6.97778	0.29	0	0.89
DCP1B	Q8IZD4	40	4.44	181	4.02222	1.1	0	0.83	48	8	181	4.02222	1.99	0.16	0.55	54	9	181	4.02222	2.24	0.2	0.51
DCP2	Q8IU60								2	0.33	22	0.488889	0.68	0	0.89
DCPS	Q96C86	6	0.67	38	0.844444	0.79	0.01	0.8	3	0.5	38	0.844444	0.59	0	0.89	5	0.83	38	0.844444	0.99	0.01	0.8
DCTN1	Q14203	38	4.22	255	5.66667	0.75	0	0.88	8	1.33	255	5.66667	0.24	0	0.89	7	1.17	255	5.66667	0.21	0	0.89
DCTN2	Q13561	28	3.11	225	5	0.62	0	0.89	9	1.5	225	5	0.3	0	0.89	11	1.83	225	5	0.37	0	0.89
DCTN4	Q9UJW0	6	0.67	49	1.08889	0.61	0	0.83	2	0.33	49	1.08889	0.31	0	0.89	2	0.33	49	1.08889	0.31	0	0.89
DCTPP1	Q9H773								1	0.17	30	0.666667	0.25	0	0.89
DCUN1D1	Q96GG9	1	0.11	33	0.733333	0.15	0	0.89	3	0.5	33	0.733333	0.68	0	0.89
DCUN1D5	Q9BTE7	5	0.56	33	0.733333	0.76	0	0.89	8	1.33	33	0.733333	1.82	0.04	0.73	3	0.5	33	0.733333	0.68	0	0.89
DDA1	Q9BW61	2	0.22	3	0.0666667	2.22	0	0.89	1	0.17	3	0.0666667	1.67	0	0.89
DDB1	Q16531	101	11.22	314	6.97778	1.61	0	0.86	104	17.33	314	6.97778	2.48	0.01	0.8	66	11	314	6.97778	1.58	0	0.86
DDB2	Q92466	1	0.11	0	0	1.11	0	0.89	2	0.33	0	0	3.33	0	0.89
DDHD1	Q8NEL9	6	0.67	16	0.355556	1.87	0.03	0.75	3	0.5	16	0.355556	1.41	0	0.89	1	0.17	16	0.355556	0.47	0	0.89
DDHD2	O94830	5	0.56	8	0.177778	3.12	0	0.89	2	0.33	8	0.177778	1.87	0	0.89
DDI2	Q5TDH0								5	0.83	51	1.13333	0.74	0.01	0.81	9	1.5	51	1.13333	1.32	0.02	0.77
DDN	O94850
DDOST	P39656	14	1.56	68	1.51111	1.03	0.02	0.77	10	1.67	68	1.51111	1.1	0.01	0.79	7	1.17	68	1.51111	0.77	0.01	0.8
DDRGK1	Q96HY6	1	0.11	69	1.53333	0.07	0	0.89
DDT	P30046								2	0.33	47	1.04444	0.32	0	0.89
DDX1	Q92499	110	12.22	581	12.9111	0.95	0	0.89	117	19.5	581	12.9111	1.51	0	0.88	112	18.67	581	12.9111	1.45	0	0.89
DDX10	Q13206	35	3.89	68	1.51111	2.57	0.13	0.61	47	7.83	68	1.51111	5.18	0.47	0.27	43	7.17	68	1.51111	4.74	0.4	0.33
DDX11L8	A8MPP1	4	0.44	1	0.0222222	4.44	0.17	0.54	2	0.33	1	0.0222222	3.33	0	0.89	1	0.17	1	0.0222222	1.67	0	0.89
DDX17	Q92841	93	10.33	554	12.3111	0.84	0	0.89	89	14.83	554	12.3111	1.2	0	0.89	88	14.67	554	12.3111	1.19	0	0.89
DDX18	Q9NVP1															1	0.17	51	1.13333	0.15	0	0.89
DDX19A	Q9NUU7
DDX19B	Q9UMR2
DDX20	Q9UHI6	10	1.11	64	1.42222	0.78	0	0.83	3	0.5	64	1.42222	0.35	0	0.89	1	0.17	64	1.42222	0.12	0	0.89
DDX21	Q9NR30	30	3.33	380	8.44444	0.39	0	0.89	18	3	380	8.44444	0.36	0	0.89	20	3.33	380	8.44444	0.39	0	0.89
DDX23	Q9BUQ8	45	5	111	2.46667	2.03	0.1	0.64	44	7.33	111	2.46667	2.97	0.15	0.56	23	3.83	111	2.46667	1.55	0.01	0.8
DDX24	Q9GZR7	18	2	66	1.46667	1.36	0.02	0.77	11	1.83	66	1.46667	1.25	0.02	0.77	7	1.17	66	1.46667	0.8	0.01	0.81
DDX27	Q96GQ7	6	0.67	16	0.355556	1.87	0.05	0.7	4	0.67	16	0.355556	1.87	0.04	0.73	8	1.33	16	0.355556	3.75	0.15	0.56
DDX31	Q9H8H2	5	0.56	12	0.266667	2.08	0.04	0.73	1	0.17	12	0.266667	0.62	0	0.89	1	0.17	12	0.266667	0.62	0	0.89
DDX39A	O00148	24	2.67	99	2.2	1.21	0.01	0.82	16	2.67	99	2.2	1.21	0	0.84	14	2.33	99	2.2	1.06	0	0.84
DDX39B	Q13838	44	4.89	166	3.68889	1.33	0	0.84	31	5.17	166	3.68889	1.4	0	0.83	31	5.17	166	3.68889	1.4	0	0.85
DDX3X	O00571	144	16	2065	45.8889	0.35	0	0.89	106	17.67	2065	45.8889	0.38	0	0.89	130	21.67	2065	45.8889	0.47	0	0.89
DDX41	Q9UJV9	78	8.67	89	1.97778	4.38	0.51	0.23	42	7	89	1.97778	3.54	0.29	0.42	38	6.33	89	1.97778	3.2	0.26	0.45
DDX42	Q86XP3	487	54.11	1111	24.6889	2.19	0	0.88	325	54.17	1111	24.6889	2.19	0	0.89	312	52	1111	24.6889	2.11	0	0.89
DDX46	Q7L014	754	83.78	1361	30.2444	2.77	0	0.87	557	92.83	1361	30.2444	3.07	0.08	0.67	413	68.83	1361	30.2444	2.28	0	0.89
DDX47	Q9H0S4	16	1.78	46	1.02222	1.74	0.07	0.69	36	6	46	1.02222	5.87	0.51	0.24	43	7.17	46	1.02222	7.01	0.57	0.2
DDX49	Q9Y6V7	10	1.11	38	0.844444	1.32	0.01	0.8	17	2.83	38	0.844444	3.36	0.15	0.57	22	3.67	38	0.844444	4.34	0.25	0.47
DDX5	P17844	148	16.44	690	15.3333	1.07	0	0.89	135	22.5	690	15.3333	1.47	0	0.89	154	25.67	690	15.3333	1.67	0	0.88
DDX50	Q9BQ39	1	0.11	100	2.22222	0.05	0	0.89	1	0.17	100	2.22222	0.07	0	0.89
DDX51	Q8N8A6	3	0.33	11	0.244444	1.36	0.04	0.73	6	1	11	0.244444	4.09	0.12	0.62	8	1.33	11	0.244444	5.45	0.27	0.44
DDX52	Q9Y2R4	7	0.78	44	0.977778	0.8	0.01	0.8	9	1.5	44	0.977778	1.53	0.02	0.76	4	0.67	44	0.977778	0.68	0	0.89
DDX54	Q8TDD1	6	0.67	40	0.888889	0.75	0	0.89	3	0.5	40	0.888889	0.56	0	0.89
DDX55	Q8NHQ9	1	0.11	39	0.866667	0.13	0	0.89	5	0.83	39	0.866667	0.96	0.02	0.76	4	0.67	39	0.866667	0.77	0.03	0.75
DDX56	Q9NY93	4	0.44	12	0.266667	1.67	0	0.89
DDX59	Q5T1V6	10	1.11	27	0.6	1.85	0.05	0.71	4	0.67	27	0.6	1.11	0.02	0.77	17	2.83	27	0.6	4.72	0.33	0.38
DDX6	P26196	147	16.33	742	16.4889	0.99	0	0.89	69	11.5	742	16.4889	0.7	0	0.89	80	13.33	742	16.4889	0.81	0	0.89
DEAF1	O75398	10	1.11	0	0	11.11	0.28	0.43	6	1	0	0	10	0.29	0.42	10	1.67	0	0	16.67	0.42	0.31
DEK	P35659	14	1.56	66	1.46667	1.06	0	0.82	14	2.33	66	1.46667	1.59	0.02	0.77	13	2.17	66	1.46667	1.48	0.02	0.77
DENND4A	Q7Z401															1	0.17	37	0.822222	0.2	0	0.89
DENND4C	Q5VZ89	2	0.22	81	1.8	0.12	0	0.89
DENND5B	Q6ZUT9								1	0.17	14	0.311111	0.54	0	0.89	1	0.17	14	0.311111	0.54	0	0.89
DENND6A	Q8IWF6
DENR	O43583	9	1	149	3.31111	0.3	0	0.89	3	0.5	149	3.31111	0.15	0	0.89	3	0.5	149	3.31111	0.15	0	0.89
DEPDC1B	Q8WUY9	1	0.11	8	0.177778	0.62	0	0.89	2	0.33	8	0.177778	1.87	0	0.89	2	0.33	8	0.177778	1.87	0	0.89
DEPDC5	O75140
DEPDC7	Q96QD5	1	0.11	2	0.0444444	1.11	0	0.89
DERL2	Q9GZP9	3	0.33	4	0.0888889	3.33	0	0.89								1	0.17	4	0.0888889	1.67	0	0.89
DFFA	O00273	32	3.56	181	4.02222	0.88	0	0.83	28	4.67	181	4.02222	1.16	0	0.86	31	5.17	181	4.02222	1.28	0	0.86
DFFB	O76075															1	0.17	2	0.0444444	1.67	0	0.89
DGAT1	O75907	1	0.11	3	0.0666667	1.11	0	0.89	1	0.17	3	0.0666667	1.67	0	0.89
DGCR8	Q8WYQ5	30	3.33	28	0.622222	5.36	0.31	0.4	26	4.33	28	0.622222	6.96	0.46	0.28	15	2.5	28	0.622222	4.02	0.18	0.53
DGKA	P23743
DGKH	Q86XP1	2	0.22	23	0.511111	0.43	0	0.89								1	0.17	23	0.511111	0.33	0	0.89
DHCR7	Q9UBM7	2	0.22	2	0.0444444	2.22	0	0.89
DHFR	P00374								3	0.5	20	0.444444	1.12	0.03	0.75	5	0.83	20	0.444444	1.88	0.03	0.75
DHPS	P49366	23	2.56	74	1.64444	1.55	0.05	0.72	21	3.5	74	1.64444	2.13	0.08	0.67	16	2.67	74	1.64444	1.62	0.02	0.76
DHRS2	Q13268	19	2.11	15	0.333333	6.33	0.4	0.33	12	2	15	0.333333	6	0.26	0.44	10	1.67	15	0.333333	5	0.29	0.42
DHRS7B	Q6IAN0	4	0.44	7	0.155556	2.86	0.1	0.64	4	0.67	7	0.155556	4.29	0	0.89
DHX15	O43143	330	36.67	1657	36.8222	1	0	0.89	252	42	1657	36.8222	1.14	0	0.89	219	36.5	1657	36.8222	0.99	0	0.89
DHX16	O60231	157	17.44	395	8.77778	1.99	0	0.82	131	21.83	395	8.77778	2.49	0.01	0.81	130	21.67	395	8.77778	2.47	0	0.82
DHX29	Q7Z478	70	7.78	1178	26.1778	0.3	0	0.89	11	1.83	1178	26.1778	0.07	0	0.89	35	5.83	1178	26.1778	0.22	0	0.89
DHX30	Q7L2E3															3	0.5	55	1.22222	0.41	0	0.89
DHX33	Q9H6R0	1	0.11	0	0	1.11	0	0.89
DHX34	Q14147	10	1.11	24	0.533333	2.08	0.09	0.65	20	3.33	24	0.533333	6.25	0.47	0.27	29	4.83	24	0.533333	9.06	0.68	0.13
DHX35	Q9H5Z1	104	11.56	11	0.244444	47.27	1	0	50	8.33	11	0.244444	34.09	0.98	0	31	5.17	11	0.244444	21.14	0.86	0.04
DHX36	Q9H2U1	12	1.33	132	2.93333	0.45	0	0.87	17	2.83	132	2.93333	0.97	0	0.86	20	3.33	132	2.93333	1.14	0	0.85
DHX37	Q8IY37								5	0.83	7	0.155556	5.36	0.15	0.56	4	0.67	7	0.155556	4.29	0.1	0.64
DHX38	Q92620	151	16.78	283	6.28889	2.67	0.08	0.67	112	18.67	283	6.28889	2.97	0.18	0.53	107	17.83	283	6.28889	2.84	0.04	0.72
DHX40	Q8IX18	63	7	114	2.53333	2.76	0.1	0.64	53	8.83	114	2.53333	3.49	0.26	0.44	39	6.5	114	2.53333	2.57	0.08	0.66
DHX57	Q6P158	3	0.33	26	0.577778	0.58	0.01	0.79	1	0.17	26	0.577778	0.29	0	0.89	1	0.17	26	0.577778	0.29	0	0.89
DHX8	Q14562	141	15.67	168	3.73333	4.2	0.43	0.3	136	22.67	168	3.73333	6.07	0.79	0.07	120	20	168	3.73333	5.36	0.7	0.12
DHX9	Q08211	252	28	1280	28.4444	0.98	0	0.89	250	41.67	1280	28.4444	1.46	0	0.89	247	41.17	1280	28.4444	1.45	0	0.89
DIABLO	Q9NR28	16	1.78	15	0.333333	5.33	0.26	0.44	12	2	15	0.333333	6	0.26	0.44	8	1.33	15	0.333333	4	0.08	0.66
DIAPH1	O60610	33	3.67	309	6.86667	0.53	0	0.89	3	0.5	309	6.86667	0.07	0	0.89	4	0.67	309	6.86667	0.1	0	0.89
DIAPH2	O60879	1	0.11	28	0.622222	0.18	0	0.89
DIAPH3	Q9NSV4	6	0.67	42	0.933333	0.71	0.01	0.79	2	0.33	42	0.933333	0.36	0	0.89
DICER1	Q9UPY3	32	3.56	417	9.26667	0.38	0	0.89	6	1	417	9.26667	0.11	0	0.89	9	1.5	417	9.26667	0.16	0	0.89
DIDO1	Q9BTC0	337	37.44	386	8.57778	4.37	0.86	0.04	172	28.67	386	8.57778	3.34	0.44	0.29	101	16.83	386	8.57778	1.96	0	0.86
DIMT1	Q9UNQ2	1	0.11	5	0.111111	1	0	0.89	1	0.17	5	0.111111	1.5	0	0.89	1	0.17	5	0.111111	1.5	0	0.89
DIP2A	Q14689	11	1.22	15	0.333333	3.67	0.16	0.55								6	1	15	0.333333	3	0.04	0.72
DIP2B	Q9P265	8	0.89	280	6.22222	0.14	0	0.89	2	0.33	280	6.22222	0.05	0	0.89	2	0.33	280	6.22222	0.05	0	0.89
DIS3	Q9Y2L1	106	11.78	554	12.3111	0.96	0	0.89	72	12	554	12.3111	0.97	0	0.89	60	10	554	12.3111	0.81	0	0.89
DIS3L	Q8TF46	25	2.78	67	1.48889	1.87	0.07	0.68	1	0.17	67	1.48889	0.11	0	0.89	1	0.17	67	1.48889	0.11	0	0.89
DKC1	O60832	26	2.89	110	2.44444	1.18	0	0.83	21	3.5	110	2.44444	1.43	0.01	0.8	12	2	110	2.44444	0.82	0	0.83
DLAT	P10515	4	0.44	15	0.333333	1.33	0	0.89
DLC1	Q96QB1															1	0.17	0	0	1.67	0	0.89
DLD	P09622	1	0.11	37	0.822222	0.14	0	0.89
DLG1	Q12959	6	0.67	136	3.02222	0.22	0	0.89	2	0.33	136	3.02222	0.11	0	0.89
DLG3	Q92796	2	0.22	5	0.111111	2	0.08	0.67
DLG5	Q8TDM6
DLGAP5	Q15398	42	4.67	92	2.04444	2.28	0.04	0.72	14	2.33	92	2.04444	1.14	0.01	0.8	22	3.67	92	2.04444	1.79	0.03	0.74
DLST	P36957	1	0.11	0	0	1.11	0	0.89
DLX2	Q07687															2	0.33	0	0	3.33	0	0.89
DLX6	P56179								1	0.17	0	0	1.67	0	0.89	3	0.5	0	0	5	0	0.89
DMAP1	Q9NPF5	24	2.67	30	0.666667	4	0.26	0.44	19	3.17	30	0.666667	4.75	0.31	0.4	7	1.17	30	0.666667	1.75	0.03	0.75
DMD	P11532	2	0.22	17	0.377778	0.59	0	0.89
DNAAF2	Q9NVR5	21	2.33	117	2.6	0.9	0	0.84	11	1.83	117	2.6	0.71	0	0.86	18	3	117	2.6	1.15	0	0.84
DNAH10	Q8IVF4	2	0.22	8	0.177778	1.25	0	0.89	3	0.5	8	0.177778	2.81	0	0.89	3	0.5	8	0.177778	2.81	0	0.89
DNAH5	Q8TE73	1	0.11	3	0.0666667	1.11	0	0.89
DNAH6	Q9C0G6
DNAJA1	P31689	44	4.89	195	4.33333	1.13	0	0.85	30	5	195	4.33333	1.15	0	0.87	25	4.17	195	4.33333	0.96	0	0.87
DNAJA2	O60884	35	3.89	174	3.86667	1.01	0	0.86	24	4	174	3.86667	1.03	0	0.86	31	5.17	174	3.86667	1.34	0	0.82
DNAJA3	Q96EY1	17	1.89	125	2.77778	0.68	0	0.85	19	3.17	125	2.77778	1.14	0	0.85	14	2.33	125	2.77778	0.84	0	0.86
DNAJB1	P25685	95	10.56	562	12.4889	0.85	0	0.89	72	12	562	12.4889	0.96	0	0.89	74	12.33	562	12.4889	0.99	0	0.89
DNAJB11	Q9UBS4	7	0.78	31	0.688889	1.13	0.01	0.8	6	1	31	0.688889	1.45	0.03	0.74	7	1.17	31	0.688889	1.69	0.01	0.78
DNAJB4	Q9UDY4	8	0.89	42	0.933333	0.95	0.02	0.76	10	1.67	42	0.933333	1.79	0.03	0.75	11	1.83	42	0.933333	1.96	0.04	0.73
DNAJB6	O75190	3	0.33	55	1.22222	0.27	0	0.89	2	0.33	55	1.22222	0.27	0	0.89	3	0.5	55	1.22222	0.41	0	0.89
DNAJC10	Q8IXB1	13	1.44	43	0.955556	1.51	0.03	0.75	16	2.67	43	0.955556	2.79	0.1	0.64	8	1.33	43	0.955556	1.4	0.02	0.77
DNAJC11	Q9NVH1								1	0.17	46	1.02222	0.16	0	0.89
DNAJC13	O75165	7	0.78	22	0.488889	1.59	0.06	0.7								1	0.17	22	0.488889	0.34	0	0.89
DNAJC16	Q9Y2G8	2	0.22	2	0.0444444	2.22	0	0.89	2	0.33	2	0.0444444	3.33	0	0.89	1	0.17	2	0.0444444	1.67	0	0.89
DNAJC17	Q9NVM6	19	2.11	72	1.6	1.32	0.01	0.8	13	2.17	72	1.6	1.35	0.01	0.78	9	1.5	72	1.6	0.94	0	0.82
DNAJC19	Q96DA6	1	0.11	1	0.0222222	1.11	0	0.89
DNAJC2	Q99543	4	0.44	69	1.53333	0.29	0	0.89	1	0.17	69	1.53333	0.11	0	0.89
DNAJC21	Q5F1R6	5	0.56	80	1.77778	0.31	0	0.89	3	0.5	80	1.77778	0.28	0	0.86	6	1	80	1.77778	0.56	0	0.84
DNAJC24	Q6P3W2	2	0.22	1	0.0222222	2.22	0	0.89	2	0.33	1	0.0222222	3.33	0	0.89
DNAJC5B	Q9UF47
DNAJC6	O75061	3	0.33	8	0.177778	1.87	0.06	0.7
DNAJC7	Q99615	37	4.11	206	4.57778	0.9	0	0.87	27	4.5	206	4.57778	0.98	0	0.87	26	4.33	206	4.57778	0.95	0	0.87
DNAJC8	O75937	118	13.11	292	6.48889	2.02	0.04	0.73	80	13.33	292	6.48889	2.05	0.04	0.72	102	17	292	6.48889	2.62	0.09	0.66
DNAJC9	Q8WXX5	49	5.44	299	6.64444	0.82	0	0.88	35	5.83	299	6.64444	0.88	0	0.88	43	7.17	299	6.64444	1.08	0	0.88
DNHD1	Q96M86
DNM1	Q05193
DNM1L	O00429	78	8.67	856	19.0222	0.46	0	0.89	24	4	856	19.0222	0.21	0	0.89	25	4.17	856	19.0222	0.22	0	0.89
DNM2	P50570	3	0.33	268	5.95556	0.06	0	0.89								1	0.17	268	5.95556	0.03	0	0.89
DNMBP	Q6XZF7	15	1.67	166	3.68889	0.45	0	0.87	2	0.33	166	3.68889	0.09	0	0.89	5	0.83	166	3.68889	0.23	0	0.89
DNMT1	P26358	73	8.11	253	5.62222	1.44	0	0.86	77	12.83	253	5.62222	2.28	0.02	0.77	74	12.33	253	5.62222	2.19	0.04	0.73
DNMT3A	Q9Y6K1	6	0.67	4	0.0888889	6.67	0.17	0.54	5	0.83	4	0.0888889	8.33	0	0.89	4	0.67	4	0.0888889	6.67	0	0.89
DNPH1	O43598	1	0.11	12	0.266667	0.42	0	0.89
DNTTIP1	Q9H147	5	0.56	7	0.155556	3.57	0.09	0.65	12	2	7	0.155556	12.86	0.56	0.2	7	1.17	7	0.155556	7.5	0.19	0.52
DNTTIP2	Q5QJE6	11	1.22	91	2.02222	0.6	0	0.84	7	1.17	91	2.02222	0.58	0	0.89	10	1.67	91	2.02222	0.82	0	0.85
DOCK1	Q14185
DOCK11	Q5JSL3								3	0.5	11	0.244444	2.05	0.06	0.69	2	0.33	11	0.244444	1.36	0	0.89
DOCK4	Q8N1I0
DOCK7	Q96N67	29	3.22	264	5.86667	0.55	0	0.88	2	0.33	264	5.86667	0.06	0	0.89	1	0.17	264	5.86667	0.03	0	0.89
DOCK9	Q9BZ29	1	0.11	12	0.266667	0.42	0	0.89
DOK1	Q99704	1	0.11	30	0.666667	0.17	0	0.89	3	0.5	30	0.666667	0.75	0	0.89	5	0.83	30	0.666667	1.25	0.01	0.78
DOT1L	Q8TEK3	3	0.33	1	0.0222222	3.33	0.09	0.66
DPCD	Q9BVM2	1	0.11	13	0.288889	0.38	0	0.89								3	0.5	13	0.288889	1.73	0	0.89
DPF2	Q92785	17	1.89	47	1.04444	1.81	0.05	0.71	9	1.5	47	1.04444	1.44	0.01	0.79	10	1.67	47	1.04444	1.6	0.02	0.76
DPH1	Q9BZG8	1	0.11	14	0.311111	0.36	0	0.89
DPH2	Q9BQC3	2	0.22	73	1.62222	0.14	0	0.89	5	0.83	73	1.62222	0.51	0	0.84	6	1	73	1.62222	0.62	0	0.85
DPH5	Q9H2P9	24	2.67	191	4.24444	0.63	0	0.86	12	2	191	4.24444	0.47	0	0.89	26	4.33	191	4.24444	1.02	0	0.87
DPH7	Q9BTV6	6	0.67	48	1.06667	0.62	0	0.89	3	0.5	48	1.06667	0.47	0	0.89	5	0.83	48	1.06667	0.78	0.01	0.8
DPM1	O60762	2	0.22	9	0.2	1.11	0	0.89	3	0.5	9	0.2	2.5	0	0.89
DPP3	Q9NY33
DPP9	Q86TI2	1	0.11	4	0.0888889	1.11	0	0.89	3	0.5	4	0.0888889	5	0	0.89	3	0.5	4	0.0888889	5	0	0.89
DPY30	Q9C005	47	5.22	120	2.66667	1.96	0.01	0.79	57	9.5	120	2.66667	3.56	0.37	0.36	31	5.17	120	2.66667	1.94	0.01	0.79
DPYSL2	Q16555	111	12.33	537	11.9333	1.03	0	0.89	46	7.67	537	11.9333	0.64	0	0.89	68	11.33	537	11.9333	0.95	0	0.89
DPYSL3	Q14195	74	8.22	488	10.8444	0.76	0	0.89	26	4.33	488	10.8444	0.4	0	0.89	36	6	488	10.8444	0.55	0	0.89
DPYSL4	O14531	66	7.33	107	2.37778	3.08	0.21	0.5	8	1.33	107	2.37778	0.56	0	0.84	41	6.83	107	2.37778	2.87	0.13	0.59
DPYSL5	Q9BPU6	83	9.22	290	6.44444	1.43	0	0.82	25	4.17	290	6.44444	0.65	0	0.88	37	6.17	290	6.44444	0.96	0	0.88
DR1	Q01658	10	1.11	18	0.4	2.78	0.06	0.7	7	1.17	18	0.4	2.92	0.03	0.74	7	1.17	18	0.4	2.92	0.03	0.74
DRAP1	Q14919	15	1.67	71	1.57778	1.06	0.02	0.76	9	1.5	71	1.57778	0.95	0	0.83	20	3.33	71	1.57778	2.11	0.03	0.74
DRG1	Q9Y295	63	7	366	8.13333	0.86	0	0.89	17	2.83	366	8.13333	0.35	0	0.89	32	5.33	366	8.13333	0.66	0	0.89
DRG2	P55039	15	1.67	319	7.08889	0.24	0	0.89	4	0.67	319	7.08889	0.09	0	0.89	11	1.83	319	7.08889	0.26	0	0.89
DROSHA	Q9NRR4	28	3.11	36	0.8	3.89	0.31	0.4	17	2.83	36	0.8	3.54	0.18	0.53	9	1.5	36	0.8	1.88	0.05	0.71
DSC1	Q08554	1	0.11	84	1.86667	0.06	0	0.89
DSCC1	Q9BVC3	1	0.11	0	0	1.11	0	0.89
DSCR9	P59020
DSG1	Q02413
DSG2	Q14126	1	0.11	22	0.488889	0.23	0	0.89	1	0.17	22	0.488889	0.34	0	0.89
DSN1	Q9H410	9	1	25	0.555556	1.8	0.08	0.67	7	1.17	25	0.555556	2.1	0.06	0.7	2	0.33	25	0.555556	0.6	0.02	0.77
DSP	P15924	101	11.22	1193	26.5111	0.42	0	0.89	35	5.83	1193	26.5111	0.22	0	0.89	22	3.67	1193	26.5111	0.14	0	0.89
DST	Q03001	2	0.22	20	0.444444	0.5	0	0.89
DSTN	P60981								2	0.33	50	1.11111	0.3	0	0.89	2	0.33	50	1.11111	0.3	0	0.89
DTD1	Q8TEA8	6	0.67	71	1.57778	0.42	0	0.86	3	0.5	71	1.57778	0.32	0	0.89	2	0.33	71	1.57778	0.21	0	0.89
DTL	Q9NZJ0	13	1.44	9	0.2	7.22	0.28	0.43	3	0.5	9	0.2	2.5	0.07	0.68	2	0.33	9	0.2	1.67	0	0.89
DTNB	O60941	1	0.11	6	0.133333	0.83	0	0.89
DTNBP1	Q96EV8
DTX3L	Q8TDB6	1	0.11	2	0.0444444	1.11	0	0.89
DUS1L	Q6P1R4	4	0.44	9	0.2	2.22	0.05	0.71								4	0.67	9	0.2	3.33	0.15	0.56
DUS2	Q9NX74	14	1.56	31	0.688889	2.26	0.1	0.65	8	1.33	31	0.688889	1.94	0.08	0.67	15	2.5	31	0.688889	3.63	0.16	0.55
DUS3L	Q96G46	11	1.22	19	0.422222	2.89	0.08	0.67	12	2	19	0.422222	4.74	0.25	0.47	16	2.67	19	0.422222	6.32	0.35	0.37
DUSP2	Q05923	1	0.11	3	0.0666667	1.11	0	0.89								2	0.33	3	0.0666667	3.33	0.13	0.59
DUSP3	P51452	8	0.89	65	1.44444	0.62	0	0.83	6	1	65	1.44444	0.69	0	0.83	6	1	65	1.44444	0.69	0	0.83
DUT	P33316	28	3.11	286	6.35556	0.49	0	0.88	25	4.17	286	6.35556	0.66	0	0.89	37	6.17	286	6.35556	0.97	0	0.88
DVL1	O14640	72	8	428	9.51111	0.84	0	0.89	33	5.5	428	9.51111	0.58	0	0.89	26	4.33	428	9.51111	0.46	0	0.89
DVL2	O14641	127	14.11	1050	23.3333	0.6	0	0.89	70	11.67	1050	23.3333	0.5	0	0.89	64	10.67	1050	23.3333	0.46	0	0.89
DVL3	Q92997	94	10.44	648	14.4	0.73	0	0.89	33	5.5	648	14.4	0.38	0	0.89	33	5.5	648	14.4	0.38	0	0.89
DYNC1H1	Q14204	43	4.78	565	12.5556	0.38	0	0.89	14	2.33	565	12.5556	0.19	0	0.89	5	0.83	565	12.5556	0.07	0	0.89
DYNC1I2	Q13409	38	4.22	203	4.51111	0.94	0	0.86	10	1.67	203	4.51111	0.37	0	0.89	22	3.67	203	4.51111	0.81	0	0.87
DYNC1LI1	Q9Y6G9	2	0.22	87	1.93333	0.11	0	0.86	1	0.17	87	1.93333	0.09	0	0.89
DYNC1LI2	O43237	5	0.56	212	4.71111	0.12	0	0.89	1	0.17	212	4.71111	0.04	0	0.89	2	0.33	212	4.71111	0.07	0	0.89
DYNC2H1	Q8NCM8								1	0.17	1	0.0222222	1.67	0	0.89	1	0.17	1	0.0222222	1.67	0	0.89
DYNC2LI1	Q8TCX1
DYNLL1	P63167	65	7.22	27	0.6	12.04	0.96	0.01	24	4	27	0.6	6.67	0.66	0.14	17	2.83	27	0.6	4.72	0.36	0.36
DYNLL2	Q96FJ2	46	5.11	17	0.377778	13.53	0.93	0.02	12	2	17	0.377778	5.29	0.27	0.44	10	1.67	17	0.377778	4.41	0.21	0.5
DYNLRB1	Q9NP97								7	1.17	48	1.06667	1.09	0.02	0.77	3	0.5	48	1.06667	0.47	0	0.89
DYNLT1	P63172	1	0.11	54	1.2	0.09	0	0.89	1	0.17	54	1.2	0.14	0	0.89
DYRK1A	Q13627	3	0.33	2	0.0444444	3.33	0	0.89	3	0.5	2	0.0444444	5	0	0.89	5	0.83	2	0.0444444	8.33	0.13	0.59
E2F1	Q01094								2	0.33	1	0.0222222	3.33	0	0.89
E2F3	O00716	10	1.11	23	0.511111	2.17	0.03	0.74	14	2.33	23	0.511111	4.57	0.2	0.51	34	5.67	23	0.511111	11.09	0.77	0.08
E2F4	Q16254															1	0.17	5	0.111111	1.5	0	0.89
E2F5	Q15329	3	0.33	14	0.311111	1.07	0	0.89	4	0.67	14	0.311111	2.14	0.05	0.72	4	0.67	14	0.311111	2.14	0	0.89
E2F6	O75461	9	1	8	0.177778	5.62	0.19	0.52	14	2.33	8	0.177778	13.12	0.57	0.2	9	1.5	8	0.177778	8.44	0.38	0.35
E2F8	A0AVK6								2	0.33	7	0.155556	2.14	0.1	0.64	3	0.5	7	0.155556	3.21	0.1	0.64
E4F1	Q66K89
EAF1	Q96JC9	2	0.22	15	0.333333	0.67	0	0.89	3	0.5	15	0.333333	1.5	0.04	0.72	2	0.33	15	0.333333	1	0	0.89
EAPP	Q56P03								1	0.17	0	0	1.67	0	0.89
EBF1	Q9UH73								9	1.5	0	0	15	0.29	0.42	18	3	0	0	30	0.8	0.07
EBF3	Q9H4W6								12	2	2	0.0444444	20	0.55	0.21	21	3.5	2	0.0444444	35	0.95	0.01
EBNA1BP2	Q99848	1	0.11	11	0.244444	0.45	0	0.89
ECD	O95905	30	3.33	148	3.28889	1.01	0	0.82	4	0.67	148	3.28889	0.2	0	0.89	11	1.83	148	3.28889	0.56	0	0.87
ECH1	Q13011	36	4	123	2.73333	1.46	0.01	0.79	19	3.17	123	2.73333	1.16	0	0.83	3	0.5	123	2.73333	0.18	0	0.89
ECHDC1	Q9NTX5	14	1.56	333	7.4	0.21	0	0.89	18	3	333	7.4	0.41	0	0.89	16	2.67	333	7.4	0.36	0	0.89
ECI2	O75521	1	0.11	8	0.177778	0.62	0	0.89
ECPAS	Q5VYK3	8	0.89	408	9.06667	0.1	0	0.89	1	0.17	408	9.06667	0.02	0	0.89
EDC3	Q96F86	8	0.89	269	5.97778	0.15	0	0.89	6	1	269	5.97778	0.17	0	0.89	12	2	269	5.97778	0.33	0	0.89
EDC4	Q6P2E9	8	0.89	754	16.7556	0.05	0	0.89	5	0.83	754	16.7556	0.05	0	0.89	2	0.33	754	16.7556	0.02	0	0.89
EDF1	O60869	15	1.67	189	4.2	0.4	0	0.88	7	1.17	189	4.2	0.28	0	0.89	12	2	189	4.2	0.48	0	0.89
EDRF1	Q3B7T1	2	0.22	7	0.155556	1.43	0	0.89	1	0.17	7	0.155556	1.07	0	0.89
EED	O75530	14	1.56	38	0.844444	1.84	0.08	0.67	15	2.5	38	0.844444	2.96	0.17	0.54	8	1.33	38	0.844444	1.58	0.04	0.72
EEF1A1	P68104	283	31.44	2725	60.5556	0.52	0	0.89	147	24.5	2725	60.5556	0.4	0	0.89	146	24.33	2725	60.5556	0.4	0	0.89
EEF1A2	Q05639	10	1.11	107	2.37778	0.47	0	0.84	1	0.17	107	2.37778	0.07	0	0.89
EEF1AKNMT	Q8N6R0
EEF1B2	P24534	21	2.33	253	5.62222	0.42	0	0.89	25	4.17	253	5.62222	0.74	0	0.88	21	3.5	253	5.62222	0.62	0	0.89
EEF1D	P29692	51	5.67	449	9.97778	0.57	0	0.89	22	3.67	449	9.97778	0.37	0	0.89	22	3.67	449	9.97778	0.37	0	0.89
EEF1E1	O43324	2	0.22	11	0.244444	0.91	0	0.89
EEF1G	P26641	171	19	1084	24.0889	0.79	0	0.89	45	7.5	1084	24.0889	0.31	0	0.89	61	10.17	1084	24.0889	0.42	0	0.89
EEF2	P13639	160	17.78	1881	41.8	0.43	0	0.89	90	15	1881	41.8	0.36	0	0.89	106	17.67	1881	41.8	0.42	0	0.89
EEFSEC	P57772	1	0.11	52	1.15556	0.1	0	0.89	3	0.5	52	1.15556	0.43	0	0.82	1	0.17	52	1.15556	0.14	0	0.89
EFCAB5	A4FU69	1	0.11	3	0.0666667	1.11	0	0.89
EFHD1	Q9BUP0	1	0.11	19	0.422222	0.26	0	0.89
EFHD2	Q96C19	84	9.33	435	9.66667	0.97	0	0.89	45	7.5	435	9.66667	0.78	0	0.89	48	8	435	9.66667	0.83	0	0.89
EFL1	Q7Z2Z2	8	0.89	260	5.77778	0.15	0	0.89	1	0.17	260	5.77778	0.03	0	0.89	3	0.5	260	5.77778	0.09	0	0.89
EFTUD2	Q15029	227	25.22	708	15.7333	1.6	0	0.89	201	33.5	708	15.7333	2.13	0	0.88	112	18.67	708	15.7333	1.19	0	0.89
EGLN1	Q9GZT9	33	3.67	305	6.77778	0.54	0	0.89	14	2.33	305	6.77778	0.34	0	0.89	22	3.67	305	6.77778	0.54	0	0.89
EHBP1	Q8NDI1	7	0.78	272	6.04444	0.13	0	0.89	1	0.17	272	6.04444	0.03	0	0.89
EHD1	Q9H4M9	4	0.44	71	1.57778	0.28	0	0.85
EHMT1	Q9H9B1	31	3.44	85	1.88889	1.82	0.02	0.76	19	3.17	85	1.88889	1.68	0.03	0.75	16	2.67	85	1.88889	1.41	0.01	0.78
EHMT2	Q96KQ7	22	2.44	40	0.888889	2.75	0.1	0.65	18	3	40	0.888889	3.38	0.19	0.52	7	1.17	40	0.888889	1.31	0.02	0.78
EIF1AD	Q8N9N8	1	0.11	100	2.22222	0.05	0	0.89	1	0.17	100	2.22222	0.07	0	0.89	1	0.17	100	2.22222	0.07	0	0.89
EIF1AX	P47813	5	0.56	82	1.82222	0.3	0	0.86	8	1.33	82	1.82222	0.73	0	0.83	5	0.83	82	1.82222	0.46	0	0.89
EIF2A	Q9BY44	58	6.44	437	9.71111	0.66	0	0.89	12	2	437	9.71111	0.21	0	0.89	41	6.83	437	9.71111	0.7	0	0.89
EIF2AK2	P19525	10	1.11	120	2.66667	0.42	0	0.89	4	0.67	120	2.66667	0.25	0	0.89	5	0.83	120	2.66667	0.31	0	0.89
EIF2B2	P49770	2	0.22	60	1.33333	0.17	0	0.89	7	1.17	60	1.33333	0.88	0	0.82	6	1	60	1.33333	0.75	0	0.82
EIF2B3	Q9NR50	8	0.89	82	1.82222	0.49	0	0.84	1	0.17	82	1.82222	0.09	0	0.89
EIF2B4	Q9UI10	2	0.22	18	0.4	0.56	0	0.89	1	0.17	18	0.4	0.42	0	0.89	2	0.33	18	0.4	0.83	0	0.89
EIF2B5	Q13144
EIF2D	P41214	8	0.89	140	3.11111	0.29	0	0.89	2	0.33	140	3.11111	0.11	0	0.89	7	1.17	140	3.11111	0.38	0	0.89
EIF2S1	P05198	57	6.33	407	9.04444	0.7	0	0.89	35	5.83	407	9.04444	0.64	0	0.89	29	4.83	407	9.04444	0.53	0	0.89
EIF2S2	P20042	38	4.22	254	5.64444	0.75	0	0.88	23	3.83	254	5.64444	0.68	0	0.88	17	2.83	254	5.64444	0.5	0	0.89
EIF2S3	P41091	35	3.89	303	6.73333	0.58	0	0.89	29	4.83	303	6.73333	0.72	0	0.89	26	4.33	303	6.73333	0.64	0	0.89
EIF3A	Q14152	74	8.22	762	16.9333	0.49	0	0.89	23	3.83	762	16.9333	0.23	0	0.89	22	3.67	762	16.9333	0.22	0	0.89
EIF3B	P55884	63	7	409	9.08889	0.77	0	0.89	25	4.17	409	9.08889	0.46	0	0.89	21	3.5	409	9.08889	0.39	0	0.89
EIF3C	Q99613	49	5.44	473	10.5111	0.52	0	0.89	21	3.5	473	10.5111	0.33	0	0.89	13	2.17	473	10.5111	0.21	0	0.89
EIF3D	O15371	78	8.67	398	8.84444	0.98	0	0.88	46	7.67	398	8.84444	0.87	0	0.89	65	10.83	398	8.84444	1.22	0	0.88
EIF3E	P60228	44	4.89	344	7.64444	0.64	0	0.89	28	4.67	344	7.64444	0.61	0	0.89	17	2.83	344	7.64444	0.37	0	0.89
EIF3F	O00303	42	4.67	163	3.62222	1.29	0	0.85	25	4.17	163	3.62222	1.15	0	0.86	12	2	163	3.62222	0.55	0	0.89
EIF3G	O75821	36	4	292	6.48889	0.62	0	0.89	14	2.33	292	6.48889	0.36	0	0.89	17	2.83	292	6.48889	0.44	0	0.89
EIF3H	O15372	24	2.67	173	3.84444	0.69	0	0.86	2	0.33	173	3.84444	0.09	0	0.89	6	1	173	3.84444	0.26	0	0.89
EIF3I	Q13347	71	7.89	452	10.0444	0.79	0	0.89	35	5.83	452	10.0444	0.58	0	0.89	28	4.67	452	10.0444	0.46	0	0.89
EIF3J	O75822	19	2.11	133	2.95556	0.71	0	0.86	14	2.33	133	2.95556	0.79	0	0.86	15	2.5	133	2.95556	0.85	0	0.86
EIF3K	Q9UBQ5	8	0.89	72	1.6	0.56	0	0.85	4	0.67	72	1.6	0.42	0	0.89	2	0.33	72	1.6	0.21	0	0.89
EIF3L	Q9Y262	47	5.22	364	8.08889	0.65	0	0.89	5	0.83	364	8.08889	0.1	0	0.89	7	1.17	364	8.08889	0.14	0	0.89
EIF3M	Q7L2H7	31	3.44	180	4	0.86	0	0.86	12	2	180	4	0.5	0	0.89	6	1	180	4	0.25	0	0.89
EIF4A1	P60842	55	6.11	573	12.7333	0.48	0	0.89	34	5.67	573	12.7333	0.45	0	0.89	36	6	573	12.7333	0.47	0	0.89
EIF4A2	Q14240	2	0.22	29	0.644444	0.34	0.01	0.8								1	0.17	29	0.644444	0.26	0	0.89
EIF4A3	P38919	43	4.78	188	4.17778	1.14	0	0.86	41	6.83	188	4.17778	1.64	0	0.84	28	4.67	188	4.17778	1.12	0	0.86
EIF4B	P23588	161	17.89	1254	27.8667	0.64	0	0.89	45	7.5	1254	27.8667	0.27	0	0.89	91	15.17	1254	27.8667	0.54	0	0.89
EIF4E	P06730	11	1.22	166	3.68889	0.33	0	0.89	1	0.17	166	3.68889	0.05	0	0.89	4	0.67	166	3.68889	0.18	0	0.89
EIF4E2	O60573	8	0.89	149	3.31111	0.27	0	0.89	3	0.5	149	3.31111	0.15	0	0.89	2	0.33	149	3.31111	0.1	0	0.89
EIF4EBP1	Q13541	7	0.78	125	2.77778	0.28	0	0.89	1	0.17	125	2.77778	0.06	0	0.89	4	0.67	125	2.77778	0.24	0	0.89
EIF4ENIF1	Q9NRA8	4	0.44	82	1.82222	0.24	0	0.86								1	0.17	82	1.82222	0.09	0	0.89
EIF4G1	Q04637	337	37.44	1706	37.9111	0.99	0	0.89	73	12.17	1706	37.9111	0.32	0	0.89	88	14.67	1706	37.9111	0.39	0	0.89
EIF4G2	P78344	158	17.56	994	22.0889	0.79	0	0.89	32	5.33	994	22.0889	0.24	0	0.89	50	8.33	994	22.0889	0.38	0	0.89
EIF4G3	O43432	80	8.89	1121	24.9111	0.36	0	0.89	8	1.33	1121	24.9111	0.05	0	0.89	20	3.33	1121	24.9111	0.13	0	0.89
EIF4H	Q15056	46	5.11	289	6.42222	0.8	0	0.88	42	7	289	6.42222	1.09	0	0.88	45	7.5	289	6.42222	1.17	0	0.88
EIF5	P55010	117	13	567	12.6	1.03	0	0.88	46	7.67	567	12.6	0.61	0	0.89	55	9.17	567	12.6	0.73	0	0.89
EIF5A	P63241	56	6.22	921	20.4667	0.3	0	0.89	45	7.5	921	20.4667	0.37	0	0.89	65	10.83	921	20.4667	0.53	0	0.89
EIF5B	O60841	66	7.33	661	14.6889	0.5	0	0.89	9	1.5	661	14.6889	0.1	0	0.89	20	3.33	661	14.6889	0.23	0	0.89
EIF6	P56537	2	0.22	50	1.11111	0.2	0	0.89	5	0.83	50	1.11111	0.75	0.01	0.8	3	0.5	50	1.11111	0.45	0	0.89
ELAC2	Q9BQ52	28	3.11	149	3.31111	0.94	0	0.86	25	4.17	149	3.31111	1.26	0	0.86	30	5	149	3.31111	1.51	0	0.84
ELAVL1	Q15717	30	3.33	137	3.04444	1.09	0	0.84	31	5.17	137	3.04444	1.7	0	0.83	34	5.67	137	3.04444	1.86	0.01	0.8
ELF1	P32519	9	1	29	0.644444	1.55	0.05	0.71	16	2.67	29	0.644444	4.14	0.23	0.48	34	5.67	29	0.644444	8.79	0.89	0.03
ELF2	Q15723	36	4	38	0.844444	4.74	0.36	0.36	41	6.83	38	0.844444	8.09	0.75	0.09	29	4.83	38	0.844444	5.72	0.56	0.21
ELF4	Q99607															11	1.83	1	0.0222222	18.33	0.42	0.3
ELK1	P19419
ELL	P55199	23	2.56	15	0.333333	7.67	0.37	0.36	3	0.5	15	0.333333	1.5	0	0.89	3	0.5	15	0.333333	1.5	0	0.89
ELMO2	Q96JJ3
ELOA	Q14241	82	9.11	165	3.66667	2.48	0.09	0.65	50	8.33	165	3.66667	2.27	0.06	0.7	35	5.83	165	3.66667	1.59	0	0.83
ELOB	Q15370	25	2.78	116	2.57778	1.08	0	0.82	19	3.17	116	2.57778	1.23	0	0.83	16	2.67	116	2.57778	1.03	0	0.84
ELOC	Q15369	18	2	86	1.91111	1.05	0	0.84	20	3.33	86	1.91111	1.74	0.01	0.79	21	3.5	86	1.91111	1.83	0.02	0.78
ELOVL1	Q9BW60	5	0.56	33	0.733333	0.76	0	0.89	7	1.17	33	0.733333	1.59	0.01	0.79	6	1	33	0.733333	1.36	0	0.89
ELOVL5	Q9NYP7	8	0.89	15	0.333333	2.67	0.08	0.66	10	1.67	15	0.333333	5	0.19	0.52	4	0.67	15	0.333333	2	0	0.89
ELP1	O95163	84	9.33	298	6.62222	1.41	0	0.84	12	2	298	6.62222	0.3	0	0.89	8	1.33	298	6.62222	0.2	0	0.89
ELP2	Q6IA86	4	0.44	42	0.933333	0.48	0.01	0.8								2	0.33	42	0.933333	0.36	0	0.89
ELP3	Q9H9T3	4	0.44	49	1.08889	0.41	0	0.89	1	0.17	49	1.08889	0.15	0	0.89
ELP4	Q96EB1	52	5.78	200	4.44444	1.3	0	0.84	21	3.5	200	4.44444	0.79	0	0.88	18	3	200	4.44444	0.67	0	0.89
ELP5	Q8TE02	47	5.22	70	1.55556	3.36	0.31	0.4	12	2	70	1.55556	1.29	0.01	0.8	12	2	70	1.55556	1.29	0.01	0.78
ELP6	Q0PNE2	28	3.11	67	1.48889	2.09	0.1	0.64	8	1.33	67	1.48889	0.9	0	0.84	11	1.83	67	1.48889	1.23	0	0.82
EMC1	Q8N766
EMC2	Q15006
EMC3	Q9P0I2
EMC4	Q5J8M3															1	0.17	4	0.0888889	1.67	0	0.89
EMC8	O43402															1	0.17	16	0.355556	0.47	0	0.89
EMD	P50402	10	1.11	239	5.31111	0.21	0	0.89	11	1.83	239	5.31111	0.35	0	0.89	14	2.33	239	5.31111	0.44	0	0.89
EME1	Q96AY2								3	0.5	2	0.0444444	5	0	0.89	4	0.67	2	0.0444444	6.67	0.13	0.59
EMG1	Q92979	4	0.44	48	1.06667	0.42	0	0.83								4	0.67	48	1.06667	0.62	0.01	0.8
EML1	O00423
EML4	Q9HC35	22	2.44	288	6.4	0.38	0	0.89
EMSY	Q7Z589	56	6.22	35	0.777778	8	0.67	0.14	20	3.33	35	0.777778	4.29	0.25	0.47	7	1.17	35	0.777778	1.5	0.05	0.7
EN2	P19622								1	0.17	0	0	1.67	0	0.89	1	0.17	0	0	1.67	0	0.89
ENAH	Q8N8S7	33	3.67	309	6.86667	0.53	0	0.89	4	0.67	309	6.86667	0.1	0	0.89	1	0.17	309	6.86667	0.02	0	0.89
ENO1	P06733	107	11.89	805	17.8889	0.66	0	0.89	75	12.5	805	17.8889	0.7	0	0.89	80	13.33	805	17.8889	0.75	0	0.89
ENSA	O43768	66	7.33	409	9.08889	0.81	0	0.88	31	5.17	409	9.08889	0.57	0	0.89	52	8.67	409	9.08889	0.95	0	0.88
ENTR1	Q96C92	28	3.11	103	2.28889	1.36	0.03	0.74	3	0.5	103	2.28889	0.22	0	0.89	5	0.83	103	2.28889	0.36	0	0.86
ENY2	Q9NPA8	61	6.78	55	1.22222	5.55	0.43	0.3	30	5	55	1.22222	4.09	0.33	0.39	16	2.67	55	1.22222	2.18	0.09	0.66
EOMES	O95936															2	0.33	0	0	3.33	0	0.89
EP300	Q09472	3	0.33	34	0.755556	0.44	0	0.89	3	0.5	34	0.755556	0.66	0	0.89	3	0.5	34	0.755556	0.66	0	0.89
EP400	Q96L91	72	8	72	1.6	5	0.56	0.2	22	3.67	72	1.6	2.29	0.07	0.68	13	2.17	72	1.6	1.35	0.03	0.75
EP400P1	Q6ZTU2	1	0.11	0	0	1.11	0	0.89
EPB41	P11171	133	14.78	618	13.7333	1.08	0	0.89	38	6.33	618	13.7333	0.46	0	0.89	58	9.67	618	13.7333	0.7	0	0.89
EPB41L1	Q9H4G0	3	0.33	51	1.13333	0.29	0	0.89	1	0.17	51	1.13333	0.15	0	0.89	1	0.17	51	1.13333	0.15	0	0.89
EPB41L2	O43491	135	15	1217	27.0444	0.55	0	0.89	37	6.17	1217	27.0444	0.23	0	0.89	42	7	1217	27.0444	0.26	0	0.89
EPB41L3	Q9Y2J2	157	17.44	714	15.8667	1.1	0	0.89	36	6	714	15.8667	0.38	0	0.89	35	5.83	714	15.8667	0.37	0	0.89
EPB41L5	Q9HCM4	21	2.33	117	2.6	0.9	0	0.82	4	0.67	117	2.6	0.26	0	0.89	5	0.83	117	2.6	0.32	0	0.89
EPC1	Q9H2F5	4	0.44	1	0.0222222	4.44	0.09	0.66	1	0.17	1	0.0222222	1.67	0	0.89
EPHA2	P29317	3	0.33	24	0.533333	0.62	0.02	0.78
EPHA6	Q9UF33	1	0.11	2	0.0444444	1.11	0	0.89	2	0.33	2	0.0444444	3.33	0	0.89
EPHB4	P54760
EPHX2	P34913	3	0.33	7	0.155556	2.14	0.1	0.64								3	0.5	7	0.155556	3.21	0.1	0.64
EPM2AIP1	Q7L775	3	0.33	13	0.288889	1.15	0	0.89	1	0.17	13	0.288889	0.58	0	0.89	2	0.33	13	0.288889	1.15	0	0.89
EPN1	Q9Y6I3	6	0.67	78	1.73333	0.38	0	0.86
EPN2	O95208	4	0.44	75	1.66667	0.27	0	0.86
EPN3	Q9H201	3	0.33	21	0.466667	0.71	0	0.89
EPPK1	P58107	14	1.56	296	6.57778	0.24	0	0.89	4	0.67	296	6.57778	0.1	0	0.89	3	0.5	296	6.57778	0.08	0	0.89
EPRS1	P07814	29	3.22	274	6.08889	0.53	0	0.89	3	0.5	274	6.08889	0.08	0	0.89	2	0.33	274	6.08889	0.05	0	0.89
EPS15	P42566	46	5.11	280	6.22222	0.82	0	0.88	4	0.67	280	6.22222	0.11	0	0.89	4	0.67	280	6.22222	0.11	0	0.89
EPS15L1	Q9UBC2	70	7.78	443	9.84444	0.79	0	0.89	50	8.33	443	9.84444	0.85	0	0.89	38	6.33	443	9.84444	0.64	0	0.89
EPS8L2	Q9H6S3	5	0.56	47	1.04444	0.53	0.01	0.81								4	0.67	47	1.04444	0.64	0	0.82
ERAL1	O75616	1	0.11	11	0.244444	0.45	0	0.89	3	0.5	11	0.244444	2.05	0.06	0.69	3	0.5	11	0.244444	2.05	0.06	0.69
ERAP1	Q9NZ08
ERBIN	Q96RT1	12	1.33	309	6.86667	0.19	0	0.89	5	0.83	309	6.86667	0.12	0	0.89	3	0.5	309	6.86667	0.07	0	0.89
ERC1	Q8IUD2	63	7	74	1.64444	4.26	0.36	0.36	2	0.33	74	1.64444	0.2	0	0.85	4	0.67	74	1.64444	0.41	0	0.89
ERCC1	P07992	32	3.56	70	1.55556	2.29	0.09	0.65	21	3.5	70	1.55556	2.25	0.06	0.7	17	2.83	70	1.55556	1.82	0.02	0.77
ERCC2	P18074	2	0.22	6	0.133333	1.67	0.07	0.68	9	1.5	6	0.133333	11.25	0.38	0.35	5	0.83	6	0.133333	6.25	0.22	0.49
ERCC3	P19447	19	2.11	58	1.28889	1.64	0.03	0.74	27	4.5	58	1.28889	3.49	0.22	0.49	13	2.17	58	1.28889	1.68	0.03	0.74
ERCC4	Q92889	34	3.78	66	1.46667	2.58	0.09	0.66	30	5	66	1.46667	3.41	0.28	0.43	21	3.5	66	1.46667	2.39	0.1	0.65
ERCC5	P28715	25	2.78	34	0.755556	3.68	0.19	0.52	18	3	34	0.755556	3.97	0.21	0.5	9	1.5	34	0.755556	1.99	0.05	0.7
ERCC6	Q03468	9	1	20	0.444444	2.25	0.05	0.7	7	1.17	20	0.444444	2.63	0.05	0.7	7	1.17	20	0.444444	2.63	0.05	0.7
ERCC6L	Q2NKX8	7	0.78	212	4.71111	0.17	0	0.89	4	0.67	212	4.71111	0.14	0	0.89	6	1	212	4.71111	0.21	0	0.89
ERF	P50548	1	0.11	17	0.377778	0.29	0	0.89	2	0.33	17	0.377778	0.88	0	0.89	8	1.33	17	0.377778	3.53	0.18	0.53
ERH	P84090	12	1.33	98	2.17778	0.61	0	0.89	6	1	98	2.17778	0.46	0	0.89	7	1.17	98	2.17778	0.54	0	0.86
ERI1	Q8IV48
ERICH1	Q86X53	6	0.67	8	0.177778	3.75	0.06	0.7	8	1.33	8	0.177778	7.5	0.17	0.54	4	0.67	8	0.177778	3.75	0.09	0.66
ERICH3	Q5RHP9
ERLIN2	O94905	1	0.11	28	0.622222	0.18	0	0.89	2	0.33	28	0.622222	0.54	0	0.89	1	0.17	28	0.622222	0.27	0	0.89
ERO1A	Q96HE7	3	0.33	1	0.0222222	3.33	0.09	0.66
ESD	P10768	10	1.11	37	0.822222	1.35	0.05	0.71	4	0.67	37	0.822222	0.81	0.01	0.78	6	1	37	0.822222	1.22	0.03	0.75
ESF1	Q9H501	42	4.67	112	2.48889	1.88	0.1	0.64	41	6.83	112	2.48889	2.75	0.24	0.48	42	7	112	2.48889	2.81	0.27	0.44
ESRRA	P11474	3	0.33	48	1.06667	0.31	0	0.89	2	0.33	48	1.06667	0.31	0	0.89	19	3.17	48	1.06667	2.97	0.13	0.58
ESS2	Q96DF8	53	5.89	95	2.11111	2.79	0.15	0.56	59	9.83	95	2.11111	4.66	0.48	0.26	45	7.5	95	2.11111	3.55	0.27	0.44
ESYT1	Q9BSJ8	50	5.56	1344	29.8667	0.19	0	0.89	11	1.83	1344	29.8667	0.06	0	0.89	20	3.33	1344	29.8667	0.11	0	0.89
ESYT2	A0FGR8	11	1.22	387	8.6	0.14	0	0.89	7	1.17	387	8.6	0.14	0	0.89	5	0.83	387	8.6	0.1	0	0.89
ETF1	P62495	42	4.67	319	7.08889	0.66	0	0.88	11	1.83	319	7.08889	0.26	0	0.89	27	4.5	319	7.08889	0.63	0	0.88
ETFA	P13804	2	0.22	80	1.77778	0.12	0	0.89	8	1.33	80	1.77778	0.75	0	0.83	3	0.5	80	1.77778	0.28	0	0.89
ETFB	P38117	7	0.78	48	1.06667	0.73	0.02	0.78
ETS1	P14921															1	0.17	0	0	1.67	0	0.89
EVL	Q9UI08	6	0.67	6	0.133333	5	0.07	0.68
EWSR1	Q01844	33	3.67	203	4.51111	0.81	0	0.88	20	3.33	203	4.51111	0.74	0	0.89	28	4.67	203	4.51111	1.03	0	0.87
EXD2	Q9NVH0
EXOC3	O60645	8	0.89	81	1.8	0.49	0	0.84								1	0.17	81	1.8	0.09	0	0.89
EXOC4	Q96A65	3	0.33	85	1.88889	0.18	0	0.89
EXOSC1	Q9Y3B2	15	1.67	29	0.644444	2.59	0.11	0.63	13	2.17	29	0.644444	3.36	0.12	0.61	1	0.17	29	0.644444	0.26	0	0.89
EXOSC10	Q01780	89	9.89	213	4.73333	2.09	0.02	0.78	75	12.5	213	4.73333	2.64	0.04	0.72	67	11.17	213	4.73333	2.36	0.09	0.65
EXOSC2	Q13868	45	5	156	3.46667	1.44	0	0.84	34	5.67	156	3.46667	1.63	0	0.83	29	4.83	156	3.46667	1.39	0	0.85
EXOSC3	Q9NQT5	30	3.33	132	2.93333	1.14	0	0.84	23	3.83	132	2.93333	1.31	0	0.83	24	4	132	2.93333	1.36	0	0.83
EXOSC4	Q9NPD3	22	2.44	70	1.55556	1.57	0.02	0.78	9	1.5	70	1.55556	0.96	0	0.83	19	3.17	70	1.55556	2.04	0.03	0.75
EXOSC5	Q9NQT4	12	1.33	43	0.955556	1.4	0.03	0.74	7	1.17	43	0.955556	1.22	0.01	0.81	3	0.5	43	0.955556	0.52	0.01	0.81
EXOSC6	Q5RKV6	28	3.11	100	2.22222	1.4	0.01	0.78	17	2.83	100	2.22222	1.27	0	0.83	23	3.83	100	2.22222	1.73	0.04	0.73
EXOSC7	Q15024	40	4.44	126	2.8	1.59	0	0.82	28	4.67	126	2.8	1.67	0	0.82	26	4.33	126	2.8	1.55	0	0.82
EXOSC8	Q96B26	23	2.56	96	2.13333	1.2	0.01	0.79	23	3.83	96	2.13333	1.8	0.02	0.76	25	4.17	96	2.13333	1.95	0.02	0.77
EXOSC9	Q06265	24	2.67	76	1.68889	1.58	0.06	0.69	22	3.67	76	1.68889	2.17	0.03	0.74	15	2.5	76	1.68889	1.48	0.01	0.79
EYA3	Q99504	22	2.44	70	1.55556	1.57	0.02	0.77	27	4.5	70	1.55556	2.89	0.16	0.55	36	6	70	1.55556	3.86	0.32	0.4
EYA4	O95677															9	1.5	8	0.177778	8.44	0.35	0.37
EZH2	Q15910								1	0.17	12	0.266667	0.62	0	0.89
EZR	P15311	55	6.11	406	9.02222	0.68	0	0.88	19	3.17	406	9.02222	0.35	0	0.89	34	5.67	406	9.02222	0.63	0	0.89
FAAH2	Q6GMR7	1	0.11	1	0.0222222	1.11	0	0.89
FAF1	Q9UNN5	1	0.11	20	0.444444	0.25	0	0.89
FAF2	Q96CS3	4	0.44	24	0.533333	0.83	0.03	0.75	3	0.5	24	0.533333	0.94	0	0.89	1	0.17	24	0.533333	0.31	0	0.89
FAIM	Q9NVQ4	1	0.11	42	0.933333	0.12	0	0.89	3	0.5	42	0.933333	0.54	0.01	0.81	3	0.5	42	0.933333	0.54	0	0.89
FAM107B	Q9H098	15	1.67	86	1.91111	0.87	0	0.83	8	1.33	86	1.91111	0.7	0	0.84	10	1.67	86	1.91111	0.87	0	0.84
FAM111B	Q6SJ93	4	0.44	20	0.444444	1	0.02	0.77	5	0.83	20	0.444444	1.88	0.03	0.75	2	0.33	20	0.444444	0.75	0	0.89
FAM114A1	Q8IWE2	3	0.33	16	0.355556	0.94	0.08	0.67
FAM114A2	Q9NRY5	11	1.22	211	4.68889	0.26	0	0.89	1	0.17	211	4.68889	0.04	0	0.89	5	0.83	211	4.68889	0.18	0	0.89
FAM117B	Q6P1L5	3	0.33	30	0.666667	0.5	0	0.89
FAM118A	Q9NWS6	1	0.11	0	0	1.11	0	0.89	1	0.17	0	0	1.67	0	0.89	1	0.17	0	0	1.67	0	0.89
FAM120A	Q9NZB2	10	1.11	161	3.57778	0.31	0	0.89	5	0.83	161	3.57778	0.23	0	0.89	6	1	161	3.57778	0.28	0	0.89
FAM120B	Q96EK7	5	0.56	39	0.866667	0.64	0.01	0.81	4	0.67	39	0.866667	0.77	0.01	0.8	6	1	39	0.866667	1.15	0.03	0.74
FAM122A	Q96E09								3	0.5	27	0.6	0.83	0.02	0.77	3	0.5	27	0.6	0.83	0	0.89
FAM122B	Q7Z309	9	1	34	0.755556	1.32	0.03	0.75	11	1.83	34	0.755556	2.43	0.06	0.69	13	2.17	34	0.755556	2.87	0.09	0.65
FAM161B	Q96MY7
FAM169A	Q9Y6X4	17	1.89	222	4.93333	0.38	0	0.89	5	0.83	222	4.93333	0.17	0	0.89	6	1	222	4.93333	0.2	0	0.89
FAM171B	Q6P995	1	0.11	5	0.111111	1	0	0.89
FAM172A	Q8WUF8	23	2.56	53	1.17778	2.17	0.11	0.63	11	1.83	53	1.17778	1.56	0.02	0.76	14	2.33	53	1.17778	1.98	0.04	0.73
FAM193A	P78312	4	0.44	3	0.0666667	4.44	0	0.89	3	0.5	3	0.0666667	5	0	0.89
FAM193B	Q96PV7	7	0.78	43	0.955556	0.81	0.01	0.8	1	0.17	43	0.955556	0.17	0	0.89	2	0.33	43	0.955556	0.35	0	0.89
FAM207A	Q9NSI2	29	3.22	68	1.51111	2.13	0.04	0.73	15	2.5	68	1.51111	1.65	0.04	0.72	22	3.67	68	1.51111	2.43	0.07	0.68
FAM221A	A4D161															8	1.33	19	0.422222	3.16	0.06	0.7
FAM50A	Q14320	96	10.67	421	9.35556	1.14	0	0.87	57	9.5	421	9.35556	1.02	0	0.88	86	14.33	421	9.35556	1.53	0	0.87
FAM53C	Q9NYF3								1	0.17	0	0	1.67	0	0.89
FAM76A	Q8TAV0	5	0.56	15	0.333333	1.67	0.11	0.63	4	0.67	15	0.333333	2	0.04	0.72	5	0.83	15	0.333333	2.5	0.09	0.66
FAM76B	Q5HYJ3	12	1.33	37	0.822222	1.62	0.02	0.77	6	1	37	0.822222	1.22	0.02	0.77	9	1.5	37	0.822222	1.82	0.04	0.73
FAM83G	A6ND36															5	0.83	19	0.422222	1.97	0.11	0.62
FAM83H	Q6ZRV2								2	0.33	52	1.15556	0.29	0	0.89	1	0.17	52	1.15556	0.14	0	0.89
FAM91A1	Q658Y4	45	5	194	4.31111	1.16	0	0.85	4	0.67	194	4.31111	0.15	0	0.89	5	0.83	194	4.31111	0.19	0	0.89
FAM98A	Q8NCA5	9	1	81	1.8	0.56	0	0.85	5	0.83	81	1.8	0.46	0	0.84	5	0.83	81	1.8	0.46	0	0.86
FAM98B	Q52LJ0	28	3.11	138	3.06667	1.01	0	0.86	33	5.5	138	3.06667	1.79	0.01	0.78	29	4.83	138	3.06667	1.58	0	0.84
FANCD2	Q9BXW9	1	0.11	35	0.777778	0.14	0	0.89
FANCI	Q9NVI1	18	2	111	2.46667	0.81	0	0.85	21	3.5	111	2.46667	1.42	0.01	0.8	10	1.67	111	2.46667	0.68	0	0.86
FAR1	Q8WVX9								4	0.67	15	0.333333	2	0.04	0.72
FARP1	Q9Y4F1								1	0.17	7	0.155556	1.07	0	0.89
FARSA	Q9Y285	12	1.33	144	3.2	0.42	0	0.89	3	0.5	144	3.2	0.16	0	0.89	9	1.5	144	3.2	0.47	0	0.89
FARSB	Q9NSD9	9	1	258	5.73333	0.17	0	0.89	3	0.5	258	5.73333	0.09	0	0.89	5	0.83	258	5.73333	0.15	0	0.89
FASN	P49327	2495	277.22	7257	161.267	1.72	0	0.89	1126	187.67	7257	161.267	1.16	0	0.89	1108	184.67	7257	161.267	1.15	0	0.89
FASTKD2	Q9NYY8
FASTKD5	Q7L8L6								1	0.17	8	0.177778	0.94	0	0.89
FAU	P62861	6	0.67	71	1.57778	0.42	0	0.89	7	1.17	71	1.57778	0.74	0	0.85	6	1	71	1.57778	0.63	0	0.89
FBL	P22087	22	2.44	156	3.46667	0.71	0	0.86	10	1.67	156	3.46667	0.48	0	0.89	16	2.67	156	3.46667	0.77	0	0.87
FBLL1	A6NHQ2								1	0.17	9	0.2	0.83	0	0.89	5	0.83	9	0.2	4.17	0	0.89
FBRS	Q9HAH7	1	0.11	5	0.111111	1	0	0.89
FBXL12	Q9NXK8								2	0.33	1	0.0222222	3.33	0	0.89
FBXL18	Q96ME1	3	0.33	16	0.355556	0.94	0	0.89	1	0.17	16	0.355556	0.47	0	0.89	6	1	16	0.355556	2.81	0.04	0.73
FBXO22	Q8NEZ5	5	0.56	76	1.68889	0.33	0	0.86	6	1	76	1.68889	0.59	0	0.89	5	0.83	76	1.68889	0.49	0	0.85
FBXO28	Q9NVF7	5	0.56	3	0.0666667	5.56	0.09	0.66	2	0.33	3	0.0666667	3.33	0	0.89	3	0.5	3	0.0666667	5	0	0.89
FBXO3	Q9UK99								6	1	0	0	10	0.13	0.59	2	0.33	0	0	3.33	0	0.89
FBXO30	Q8TB52															1	0.17	26	0.577778	0.29	0	0.89
FBXO38	Q6PIJ6	3	0.33	0	0	3.33	0	0.89	7	1.17	0	0	11.67	0.29	0.42	3	0.5	0	0	5	0	0.89
FBXO4	Q9UKT5	6	0.67	62	1.37778	0.48	0	0.83	3	0.5	62	1.37778	0.36	0	0.89	1	0.17	62	1.37778	0.12	0	0.89
FBXO41	Q8TF61	1	0.11	0	0	1.11	0	0.89	3	0.5	0	0	5	0.13	0.59	4	0.67	0	0	6.67	0.16	0.55
FBXO7	Q9Y3I1
FBXO9	Q9UK97	3	0.33	18	0.4	0.83	0	0.89	1	0.17	18	0.4	0.42	0	0.89	3	0.5	18	0.4	1.25	0	0.89
FBXW11	Q9UKB1	3	0.33	1	0.0222222	3.33	0	0.89	1	0.17	1	0.0222222	1.67	0	0.89
FCHO2	Q0JRZ9	2	0.22	43	0.955556	0.23	0	0.89	1	0.17	43	0.955556	0.17	0	0.89	1	0.17	43	0.955556	0.17	0	0.89
FCHSD2	O94868
FDPS	P14324
FEN1	P39748	227	25.22	460	10.2222	2.47	0.15	0.57	113	18.83	460	10.2222	1.84	0	0.85	169	28.17	460	10.2222	2.76	0.24	0.48
FER	P16591	2	0.22	0	0	2.22	0	0.89
FERMT1	Q9BQL6	1	0.11	85	1.88889	0.06	0	0.89
FERMT2	Q96AC1	22	2.44	642	14.2667	0.17	0	0.89								6	1	642	14.2667	0.07	0	0.89
FGFR1OP	O95684	9	1	142	3.15556	0.32	0	0.89								4	0.67	142	3.15556	0.21	0	0.89
FGG	P02679	1	0.11	12	0.266667	0.42	0	0.89
FHL1	Q13642	23	2.56	180	4	0.64	0	0.89	14	2.33	180	4	0.58	0	0.89	11	1.83	180	4	0.46	0	0.89
FHL2	Q14192	3	0.33	32	0.711111	0.47	0.01	0.8	1	0.17	32	0.711111	0.23	0	0.89	2	0.33	32	0.711111	0.47	0	0.89
FHL3	Q13643	2	0.22	44	0.977778	0.23	0	0.82	2	0.33	44	0.977778	0.34	0	0.89	2	0.33	44	0.977778	0.34	0	0.89
FHOD1	Q9Y613	8	0.89	66	1.46667	0.61	0	0.82	2	0.33	66	1.46667	0.23	0	0.89	2	0.33	66	1.46667	0.23	0	0.89
FIBP	O43427
FIGN	Q5HY92
FIGNL1	Q6PIW4	11	1.22	62	1.37778	0.89	0.01	0.81	23	3.83	62	1.37778	2.78	0.12	0.62	13	2.17	62	1.37778	1.57	0.02	0.77
FIP1L1	Q6UN15	104	11.56	239	5.31111	2.18	0.04	0.73	80	13.33	239	5.31111	2.51	0.03	0.74	67	11.17	239	5.31111	2.1	0	0.83
FIS1	Q9Y3D6	7	0.78	20	0.444444	1.75	0	0.89	5	0.83	20	0.444444	1.88	0	0.89	3	0.5	20	0.444444	1.12	0	0.89
FKBP15	Q5T1M5	3	0.33	50	1.11111	0.3	0	0.89
FKBP1A	P62942								3	0.5	18	0.4	1.25	0	0.89
FKBP3	Q00688	21	2.33	230	5.11111	0.46	0	0.88	5	0.83	230	5.11111	0.16	0	0.89	9	1.5	230	5.11111	0.29	0	0.89
FKBP4	Q02790	37	4.11	359	7.97778	0.52	0	0.89	16	2.67	359	7.97778	0.33	0	0.89	26	4.33	359	7.97778	0.54	0	0.89
FKBP5	Q13451	24	2.67	103	2.28889	1.17	0.04	0.72	13	2.17	103	2.28889	0.95	0	0.84	11	1.83	103	2.28889	0.8	0	0.86
FLAD1	Q8NFF5	5	0.56	54	1.2	0.46	0	0.83	15	2.5	54	1.2	2.08	0.06	0.69	14	2.33	54	1.2	1.94	0.05	0.71
FLI1	Q01543	9	1	16	0.355556	2.81	0.13	0.58	31	5.17	16	0.355556	14.53	0.98	0	43	7.17	16	0.355556	20.16	1	0
FLII	Q13045	5	0.56	42	0.933333	0.6	0.01	0.78	2	0.33	42	0.933333	0.36	0	0.89
FLNA	P21333	3177	353	9979	221.756	1.59	0	0.89	936	156	9979	221.756	0.7	0	0.89	769	128.17	9979	221.756	0.58	0	0.89
FLNB	O75369	194	21.56	796	17.6889	1.22	0	0.89	29	4.83	796	17.6889	0.27	0	0.89	14	2.33	796	17.6889	0.13	0	0.89
FLNC	Q14315	84	9.33	315	7	1.33	0	0.87	22	3.67	315	7	0.52	0	0.89	15	2.5	315	7	0.36	0	0.89
FLOT2	Q14254	1	0.11	26	0.577778	0.19	0	0.89
FLYWCH1	Q4VC44	3	0.33	2	0.0444444	3.33	0.09	0.66	3	0.5	2	0.0444444	5	0	0.89	3	0.5	2	0.0444444	5	0	0.89
FLYWCH2	Q96CP2	33	3.67	155	3.44444	1.06	0	0.86	17	2.83	155	3.44444	0.82	0	0.87	26	4.33	155	3.44444	1.26	0	0.85
FMR1	Q06787	7	0.78	206	4.57778	0.17	0	0.89								1	0.17	206	4.57778	0.04	0	0.89
FN3KRP	Q9HA64	1	0.11	40	0.888889	0.12	0	0.89
FNBP1	Q96RU3	8	0.89	150	3.33333	0.27	0	0.89								2	0.33	150	3.33333	0.1	0	0.89
FNBP1L	Q5T0N5	4	0.44	113	2.51111	0.18	0	0.89								1	0.17	113	2.51111	0.07	0	0.89
FNBP4	Q8N3X1	51	5.67	92	2.04444	2.77	0.21	0.51	35	5.83	92	2.04444	2.85	0.39	0.33	23	3.83	92	2.04444	1.88	0.13	0.58
FNDC3A	Q9Y2H6	1	0.11	40	0.888889	0.12	0	0.89
FNTA	P49354
FOS	P01100
FOSB	P53539															12	2	10	0.222222	9	0.35	0.37
FOSL1	P15407	3	0.33	0	0	3.33	0	0.89	6	1	0	0	10	0.38	0.34	5	0.83	0	0	8.33	0.26	0.45
FOSL2	P15408	5	0.56	7	0.155556	3.57	0.13	0.61	4	0.67	7	0.155556	4.29	0	0.89	7	1.17	7	0.155556	7.5	0.24	0.48
FOXA1	P55317															5	0.83	1	0.0222222	8.33	0.26	0.45
FOXC1	Q12948	2	0.22	14	0.311111	0.71	0	0.89	3	0.5	14	0.311111	1.61	0	0.89	24	4	14	0.311111	12.86	0.74	0.1
FOXD2	O60548								2	0.33	1	0.0222222	3.33	0	0.89	6	1	1	0.0222222	10	0.29	0.42
FOXD3	Q9UJU5								3	0.5	1	0.0222222	5	0	0.89	5	0.83	1	0.0222222	8.33	0	0.89
FOXH1	O75593	1	0.11	5	0.111111	1	0	0.89								2	0.33	5	0.111111	3	0	0.89
FOXJ2	Q9P0K8	2	0.22	4	0.0888889	2.22	0	0.89	2	0.33	4	0.0888889	3.33	0	0.89	2	0.33	4	0.0888889	3.33	0	0.89
FOXJ3	Q9UPW0								6	1	2	0.0444444	10	0.26	0.45	11	1.83	2	0.0444444	18.33	0.45	0.29
FOXK1	P85037	29	3.22	136	3.02222	1.07	0	0.82	46	7.67	136	3.02222	2.54	0.06	0.69	38	6.33	136	3.02222	2.1	0.06	0.7
FOXK2	Q01167	71	7.89	105	2.33333	3.38	0.38	0.35	31	5.17	105	2.33333	2.21	0.03	0.74	42	7	105	2.33333	3	0.24	0.47
FOXM1	Q08050								1	0.17	1	0.0222222	1.67	0	0.89	4	0.67	1	0.0222222	6.67	0	0.89
FOXO1	Q12778	7	0.78	31	0.688889	1.13	0	0.89	3	0.5	31	0.688889	0.73	0	0.89	4	0.67	31	0.688889	0.97	0.02	0.78
FOXO6	A8MYZ6															3	0.5	1	0.0222222	5	0	0.89
FOXP1	Q9H334	1	0.11	0	0	1.11	0	0.89	2	0.33	0	0	3.33	0	0.89	1	0.17	0	0	1.67	0	0.89
FOXP4	Q8IVH2	3	0.33	13	0.288889	1.15	0	0.89	2	0.33	13	0.288889	1.15	0	0.89	1	0.17	13	0.288889	0.58	0	0.89
FOXRED1	Q96CU9	1	0.11	3	0.0666667	1.11	0	0.89
FRA10AC1	Q70Z53								2	0.33	30	0.666667	0.5	0	0.89	4	0.67	30	0.666667	1	0.03	0.75
FRG1	Q14331	28	3.11	113	2.51111	1.24	0	0.82	25	4.17	113	2.51111	1.66	0.01	0.78	39	6.5	113	2.51111	2.59	0.18	0.53
FRS2	Q8WU20	5	0.56	36	0.8	0.69	0.01	0.81	4	0.67	36	0.8	0.83	0.01	0.8	4	0.67	36	0.8	0.83	0.01	0.8
FSCN1	Q16658	1	0.11	77	1.71111	0.06	0	0.89	5	0.83	77	1.71111	0.49	0	0.83
FSD1	Q9BTV5	3	0.33	29	0.644444	0.52	0.01	0.79	1	0.17	29	0.644444	0.26	0	0.89	5	0.83	29	0.644444	1.29	0.03	0.74
FSIP2	Q5CZC0	1	0.11	7	0.155556	0.71	0	0.89	2	0.33	7	0.155556	2.14	0	0.89	1	0.17	7	0.155556	1.07	0	0.89
FTO	Q9C0B1	27	3	236	5.24444	0.57	0	0.88	24	4	236	5.24444	0.76	0	0.88	29	4.83	236	5.24444	0.92	0	0.88
FTSJ3	Q8IY81	3	0.33	107	2.37778	0.14	0	0.89	2	0.33	107	2.37778	0.14	0	0.89	1	0.17	107	2.37778	0.07	0	0.89
FUBP1	Q96AE4	96	10.67	379	8.42222	1.27	0	0.88	54	9	379	8.42222	1.07	0	0.88	64	10.67	379	8.42222	1.27	0	0.88
FUBP3	Q96I24	63	7	506	11.2444	0.62	0	0.89	38	6.33	506	11.2444	0.56	0	0.89	46	7.67	506	11.2444	0.68	0	0.89
FUS	P35637	106	11.78	626	13.9111	0.85	0	0.89	33	5.5	626	13.9111	0.4	0	0.89	59	9.83	626	13.9111	0.71	0	0.89
FXR1	P51114	33	3.67	564	12.5333	0.29	0	0.89	14	2.33	564	12.5333	0.19	0	0.89	31	5.17	564	12.5333	0.41	0	0.89
FXR2	P51116	7	0.78	282	6.26667	0.12	0	0.89	2	0.33	282	6.26667	0.05	0	0.89	6	1	282	6.26667	0.16	0	0.89
FYCO1	Q9BQS8	1	0.11	2	0.0444444	1.11	0	0.89
FYTTD1	Q96QD9
G3BP1	Q13283	138	15.33	1703	37.8444	0.41	0	0.89	63	10.5	1703	37.8444	0.28	0	0.89	87	14.5	1703	37.8444	0.38	0	0.89
G3BP2	Q9UN86	21	2.33	354	7.86667	0.3	0	0.89	15	2.5	354	7.86667	0.32	0	0.89	14	2.33	354	7.86667	0.3	0	0.89
G6PD	P11413	13	1.44	431	9.57778	0.15	0	0.89	3	0.5	431	9.57778	0.05	0	0.89	4	0.67	431	9.57778	0.07	0	0.89
GAB1	Q13480	1	0.11	62	1.37778	0.08	0	0.89
GAB2	Q9UQC2
GABPA	Q06546	40	4.44	156	3.46667	1.28	0.01	0.81	65	10.83	156	3.46667	3.12	0.19	0.52	61	10.17	156	3.46667	2.93	0.21	0.51
GABPB1	Q06547	4	0.44	7	0.155556	2.86	0.1	0.64	2	0.33	7	0.155556	2.14	0	0.89	3	0.5	7	0.155556	3.21	0	0.89
GAK	O14976	9	1	73	1.62222	0.62	0	0.83	2	0.33	73	1.62222	0.21	0	0.89	1	0.17	73	1.62222	0.1	0	0.89
GALK1	P51570	3	0.33	25	0.555556	0.6	0	0.89	2	0.33	25	0.555556	0.6	0	0.89
GALNT12	Q8IXK2	3	0.33	2	0.0444444	3.33	0	0.89
GAMT	Q14353	5	0.56	173	3.84444	0.14	0	0.89	2	0.33	173	3.84444	0.09	0	0.89	6	1	173	3.84444	0.26	0	0.89
GANAB	Q14697	34	3.78	129	2.86667	1.32	0.04	0.73	16	2.67	129	2.86667	0.93	0.01	0.8	6	1	129	2.86667	0.35	0	0.89
GAPDH	P04406	36	4	235	5.22222	0.77	0	0.86	38	6.33	235	5.22222	1.21	0	0.85	25	4.17	235	5.22222	0.8	0	0.88
GAPVD1	Q14C86	34	3.78	106	2.35556	1.6	0.01	0.79	6	1	106	2.35556	0.42	0	0.89	4	0.67	106	2.35556	0.28	0	0.89
GAR1	Q9NY12	5	0.56	10	0.222222	2.5	0	0.89	2	0.33	10	0.222222	1.5	0	0.89	4	0.67	10	0.222222	3	0	0.89
GARS1	P41250	8	0.89	104	2.31111	0.38	0	0.86	3	0.5	104	2.31111	0.22	0	0.89	2	0.33	104	2.31111	0.14	0	0.89
GART	P22102	37	4.11	724	16.0889	0.26	0	0.89	10	1.67	724	16.0889	0.1	0	0.89	13	2.17	724	16.0889	0.13	0	0.89
GATA2	P23769	6	0.67	1	0.0222222	6.67	0.11	0.63	8	1.33	1	0.0222222	13.33	0.42	0.31	13	2.17	1	0.0222222	21.67	0.61	0.18
GATA4	P43694															5	0.83	4	0.0888889	8.33	0.16	0.55
GATAD1	Q8WUU5	8	0.89	3	0.0666667	8.89	0.28	0.43	7	1.17	3	0.0666667	11.67	0.26	0.45	1	0.17	3	0.0666667	1.67	0	0.89
GATAD2A	Q86YP4	92	10.22	94	2.08889	4.89	0.81	0.06	63	10.5	94	2.08889	5.03	0.62	0.17	32	5.33	94	2.08889	2.55	0.36	0.36
GATAD2B	Q8WXI9	92	10.22	142	3.15556	3.24	0.46	0.27	53	8.83	142	3.15556	2.8	0.24	0.48	33	5.5	142	3.15556	1.74	0.01	0.79
GATD3A	P0DPI2	8	0.89	23	0.511111	1.74	0.09	0.66	8	1.33	23	0.511111	2.61	0.1	0.64	13	2.17	23	0.511111	4.24	0.18	0.53
GATD3B	A0A0B4J2D5	10	1.11	25	0.555556	2	0.1	0.65	20	3.33	25	0.555556	6	0.37	0.35	28	4.67	25	0.555556	8.4	0.61	0.17
GBE1	Q04446	2	0.22	76	1.68889	0.13	0	0.89								1	0.17	76	1.68889	0.1	0	0.89
GBF1	Q92538	3	0.33	45	1	0.33	0	0.89	2	0.33	45	1	0.33	0	0.89	2	0.33	45	1	0.33	0	0.89
GCAT	O75600								2	0.33	8	0.177778	1.87	0.08	0.66	1	0.17	8	0.177778	0.94	0	0.89
GCC2	Q8IWJ2	4	0.44	3	0.0666667	4.44	0	0.89
GCDH	Q92947	1	0.11	0	0	1.11	0	0.89
GCFC2	P16383	23	2.56	237	5.26667	0.49	0	0.88	19	3.17	237	5.26667	0.6	0	0.89	6	1	237	5.26667	0.19	0	0.89
GCLC	P48506	1	0.11	229	5.08889	0.02	0	0.89								2	0.33	229	5.08889	0.07	0	0.89
GCLM	P48507	6	0.67	18	0.4	1.67	0	0.89	6	1	18	0.4	2.5	0	0.89	5	0.83	18	0.4	2.08	0	0.89
GCN1	Q92616	99	11	382	8.48889	1.3	0	0.87	8	1.33	382	8.48889	0.16	0	0.89	8	1.33	382	8.48889	0.16	0	0.89
GCOM2	Q9BZD3	5	0.56	22	0.488889	1.14	0	0.89	3	0.5	22	0.488889	1.02	0	0.89	3	0.5	22	0.488889	1.02	0	0.89
GDI2	P50395								5	0.83	77	1.71111	0.49	0	0.84	6	1	77	1.71111	0.58	0	0.84
GEMIN4	P57678	3	0.33	16	0.355556	0.94	0	0.89
GEMIN5	Q8TEQ6	194	21.56	869	19.3111	1.12	0	0.89	45	7.5	869	19.3111	0.39	0	0.89	58	9.67	869	19.3111	0.5	0	0.89
GEMIN6	Q8WXD5
GEN1	Q17RS7	4	0.44	30	0.666667	0.67	0	0.89
GET4	Q7L5D6								3	0.5	7	0.155556	3.21	0.1	0.64	1	0.17	7	0.155556	1.07	0	0.89
GFER	P55789	1	0.11	4	0.0888889	1.11	0	0.89	4	0.67	4	0.0888889	6.67	0.13	0.61	6	1	4	0.0888889	10	0.38	0.35
GFPT1	Q06210	33	3.67	291	6.46667	0.57	0	0.88	4	0.67	291	6.46667	0.1	0	0.89	9	1.5	291	6.46667	0.23	0	0.89
GGA1	Q9UJY5	4	0.44	141	3.13333	0.14	0	0.89	2	0.33	141	3.13333	0.11	0	0.89	2	0.33	141	3.13333	0.11	0	0.89
GGA2	Q9UJY4															1	0.17	58	1.28889	0.13	0	0.89
GGA3	Q9NZ52	12	1.33	70	1.55556	0.86	0	0.83	1	0.17	70	1.55556	0.11	0	0.89	2	0.33	70	1.55556	0.21	0	0.89
GID8	Q9NWU2	16	1.78	117	2.6	0.68	0	0.86	11	1.83	117	2.6	0.71	0	0.85	4	0.67	117	2.6	0.26	0	0.89
GIGYF2	Q6Y7W6	71	7.89	294	6.53333	1.21	0	0.88	15	2.5	294	6.53333	0.38	0	0.89	9	1.5	294	6.53333	0.23	0	0.89
GINS1	Q14691	8	0.89	100	2.22222	0.4	0	0.89	8	1.33	100	2.22222	0.6	0	0.89	10	1.67	100	2.22222	0.75	0	0.89
GINS2	Q9Y248	8	0.89	69	1.53333	0.58	0	0.83	5	0.83	69	1.53333	0.54	0	0.84	7	1.17	69	1.53333	0.76	0	0.84
GINS3	Q9BRX5	17	1.89	158	3.51111	0.54	0	0.87	11	1.83	158	3.51111	0.52	0	0.89	24	4	158	3.51111	1.14	0	0.86
GINS4	Q9BRT9	12	1.33	105	2.33333	0.57	0	0.85	9	1.5	105	2.33333	0.64	0	0.86	13	2.17	105	2.33333	0.93	0	0.84
GIPC1	O14908	13	1.44	81	1.8	0.8	0.01	0.81	6	1	81	1.8	0.56	0	0.85	16	2.67	81	1.8	1.48	0.01	0.79
GIPC2	Q8TF65	2	0.22	3	0.0666667	2.22	0	0.89
GIT1	Q9Y2X7	13	1.44	98	2.17778	0.66	0	0.86	3	0.5	98	2.17778	0.23	0	0.89	2	0.33	98	2.17778	0.15	0	0.89
GIT2	Q14161	4	0.44	75	1.66667	0.27	0	0.85
GLE1	Q53GS7	2	0.22	6	0.133333	1.67	0	0.89								1	0.17	6	0.133333	1.25	0	0.89
GLI3	P10071	4	0.44	22	0.488889	0.91	0	0.89	11	1.83	22	0.488889	3.75	0.14	0.58	4	0.67	22	0.488889	1.36	0.02	0.76
GLMN	Q92990
GLO1	Q04760	20	2.22	403	8.95556	0.25	0	0.89	17	2.83	403	8.95556	0.32	0	0.89	13	2.17	403	8.95556	0.24	0	0.89
GLOD4	Q9HC38	5	0.56	285	6.33333	0.09	0	0.89	3	0.5	285	6.33333	0.08	0	0.89	4	0.67	285	6.33333	0.11	0	0.89
GLRX3	O76003	24	2.67	205	4.55556	0.59	0	0.89	29	4.83	205	4.55556	1.06	0	0.86	32	5.33	205	4.55556	1.17	0	0.87
GLUD1	P00367															1	0.17	108	2.4	0.07	0	0.89
GLUL	P15104	7	0.78	28	0.622222	1.25	0.04	0.73	1	0.17	28	0.622222	0.27	0	0.89
GLYR1	Q49A26	1	0.11	98	2.17778	0.05	0	0.89								4	0.67	98	2.17778	0.31	0	0.89
GMDS	O60547	3	0.33	21	0.466667	0.71	0	0.89								1	0.17	21	0.466667	0.36	0	0.89
GMEB1	Q9Y692	8	0.89	10	0.222222	4	0.09	0.66	14	2.33	10	0.222222	10.5	0.51	0.23	9	1.5	10	0.222222	6.75	0.26	0.45
GMEB2	Q9UKD1	16	1.78	41	0.911111	1.95	0.05	0.7	14	2.33	41	0.911111	2.56	0.09	0.65	19	3.17	41	0.911111	3.48	0.15	0.56
GMIP	Q9P107	2	0.22	2	0.0444444	2.22	0	0.89	1	0.17	2	0.0444444	1.67	0	0.89	1	0.17	2	0.0444444	1.67	0	0.89
GMNN	O75496	5	0.56	14	0.311111	1.79	0	0.89	3	0.5	14	0.311111	1.61	0	0.89	3	0.5	14	0.311111	1.61	0	0.89
GMPPA	Q96IJ6	3	0.33	45	1	0.33	0	0.89	1	0.17	45	1	0.17	0	0.89
GMPS	P49915	149	16.56	752	16.7111	0.99	0	0.89	141	23.5	752	16.7111	1.41	0	0.89	149	24.83	752	16.7111	1.49	0	0.89
GNA13	Q14344								1	0.17	4	0.0888889	1.67	0	0.89
GNAI2	P04899	6	0.67	35	0.777778	0.86	0	0.89	2	0.33	35	0.777778	0.43	0	0.89	5	0.83	35	0.777778	1.07	0.01	0.8
GNAI3	P08754	3	0.33	33	0.733333	0.45	0	0.89
GNAS	Q5JWF2	3	0.33	51	1.13333	0.29	0	0.89	6	1	51	1.13333	0.88	0	0.89	3	0.5	51	1.13333	0.44	0	0.89
GNB1	P62873	5	0.56	53	1.17778	0.47	0	0.89	8	1.33	53	1.17778	1.13	0.02	0.76	6	1	53	1.17778	0.85	0.01	0.81
GNB1L	Q9BYB4	3	0.33	8	0.177778	1.87	0	0.89
GNG12	Q9UBI6								3	0.5	15	0.333333	1.5	0	0.89
GNL1	P36915															1	0.17	44	0.977778	0.17	0	0.89
GNL2	Q13823	25	2.78	62	1.37778	2.02	0.07	0.68	11	1.83	62	1.37778	1.33	0.05	0.72	7	1.17	62	1.37778	0.85	0.01	0.81
GNL3	Q9BVP2	63	7	120	2.66667	2.62	0.29	0.42	16	2.67	120	2.66667	1	0	0.85	14	2.33	120	2.66667	0.88	0	0.84
GNL3L	Q9NVN8								4	0.67	13	0.288889	2.31	0.05	0.7	4	0.67	13	0.288889	2.31	0	0.89
GNPDA1	P46926															1	0.17	154	3.42222	0.05	0	0.89
GNPNAT1	Q96EK6
GOLGA1	Q92805															1	0.17	0	0	1.67	0	0.89
GOLGA2	Q08379	1	0.11	19	0.422222	0.26	0	0.89
GOLGA3	Q08378	4	0.44	27	0.6	0.74	0	0.89	4	0.67	27	0.6	1.11	0	0.89	5	0.83	27	0.6	1.39	0.02	0.78
GOLGA5	Q8TBA6	5	0.56	118	2.62222	0.21	0	0.89	1	0.17	118	2.62222	0.06	0	0.89	2	0.33	118	2.62222	0.13	0	0.89
GOLGA8M	H3BSY2
GOLGB1	Q14789	1	0.11	7	0.155556	0.71	0	0.89
GOLPH3	Q9H4A6	4	0.44	112	2.48889	0.18	0	0.89	4	0.67	112	2.48889	0.27	0	0.89	1	0.17	112	2.48889	0.07	0	0.89
GOLPH3L	Q9H4A5															1	0.17	22	0.488889	0.34	0	0.89
GON4L	Q3T8J9	3	0.33	2	0.0444444	3.33	0.09	0.66	9	1.5	2	0.0444444	15	0.51	0.23	4	0.67	2	0.0444444	6.67	0.13	0.59
GOPC	Q9HD26	5	0.56	186	4.13333	0.13	0	0.89	3	0.5	186	4.13333	0.12	0	0.89	1	0.17	186	4.13333	0.04	0	0.89
GORAB	Q5T7V8
GORASP2	Q9H8Y8	1	0.11	72	1.6	0.07	0	0.89
GPALPP1	Q8IXQ4	41	4.56	110	2.44444	1.86	0.04	0.72	34	5.67	110	2.44444	2.32	0.04	0.72	41	6.83	110	2.44444	2.8	0.1	0.64
GPANK1	O95872								2	0.33	0	0	3.33	0	0.89	3	0.5	0	0	5	0	0.89
GPATCH1	Q9BRR8	160	17.78	81	1.8	9.88	0.96	0.01	71	11.83	81	1.8	6.57	0.81	0.06	51	8.5	81	1.8	4.72	0.48	0.26
GPATCH11	Q8N954	27	3	62	1.37778	2.18	0.08	0.67	21	3.5	62	1.37778	2.54	0.13	0.61	26	4.33	62	1.37778	3.15	0.21	0.51
GPATCH4	Q5T3I0	27	3	75	1.66667	1.8	0.08	0.67	24	4	75	1.66667	2.4	0.07	0.68	17	2.83	75	1.66667	1.7	0.02	0.76
GPATCH8	Q9UKJ3	50	5.56	223	4.95556	1.12	0	0.87	28	4.67	223	4.95556	0.94	0	0.87	21	3.5	223	4.95556	0.71	0	0.89
GPBP1	Q86WP2
GPHN	Q9NQX3	40	4.44	120	2.66667	1.67	0.01	0.79	8	1.33	120	2.66667	0.5	0	0.87	8	1.33	120	2.66667	0.5	0	0.89
GPI	P06744	1	0.11	23	0.511111	0.22	0	0.89
GPKOW	Q92917	128	14.22	521	11.5778	1.23	0	0.89	84	14	521	11.5778	1.21	0	0.89	95	15.83	521	11.5778	1.37	0	0.88
GPN1	Q9HCN4	4	0.44	143	3.17778	0.14	0	0.89								3	0.5	143	3.17778	0.16	0	0.89
GPN3	Q9UHW5	4	0.44	44	0.977778	0.45	0	0.89	4	0.67	44	0.977778	0.68	0	0.89	3	0.5	44	0.977778	0.51	0	0.89
GPR89B	P0CG08	1	0.11	22	0.488889	0.23	0	0.89
GPRASP2	Q96D09	2	0.22	51	1.13333	0.2	0	0.89								3	0.5	51	1.13333	0.44	0	0.82
GPRIN1	Q7Z2K8	2	0.22	44	0.977778	0.23	0	0.89								1	0.17	44	0.977778	0.17	0	0.89
GPS1	Q13098	35	3.89	186	4.13333	0.94	0	0.86	27	4.5	186	4.13333	1.09	0.01	0.81	30	5	186	4.13333	1.21	0	0.84
GPS2	Q13227								3	0.5	0	0	5	0	0.89
GPSM1	Q86YR5
GPX4	P36969	1	0.11	5	0.111111	1	0	0.89
GRB2	P62993	20	2.22	59	1.31111	1.69	0.07	0.68	7	1.17	59	1.31111	0.89	0	0.82	5	0.83	59	1.31111	0.64	0	0.82
GREB1L	Q9C091															1	0.17	0	0	1.67	0	0.89
GRHL1	Q9NZI5															1	0.17	0	0	1.67	0	0.89
GRIPAP1	Q4V328	1	0.11	3	0.0666667	1.11	0	0.89
GRK2	P25098	21	2.33	310	6.88889	0.34	0	0.88								4	0.67	310	6.88889	0.1	0	0.89
GRK5	P34947	1	0.11	14	0.311111	0.36	0	0.89
GRPEL1	Q9HAV7	2	0.22	11	0.244444	0.91	0	0.89	1	0.17	11	0.244444	0.68	0	0.89	1	0.17	11	0.244444	0.68	0	0.89
GRSF1	Q12849															4	0.67	20	0.444444	1.5	0.03	0.75
GRWD1	Q9BQ67	32	3.56	87	1.93333	1.84	0.09	0.66	22	3.67	87	1.93333	1.9	0.05	0.71	27	4.5	87	1.93333	2.33	0.06	0.69
GSDME	O60443	36	4	70	1.55556	2.57	0.15	0.56	12	2	70	1.55556	1.29	0.01	0.79	21	3.5	70	1.55556	2.25	0.06	0.69
GSE1	Q14687	52	5.78	88	1.95556	2.95	0.18	0.53	28	4.67	88	1.95556	2.39	0.11	0.63	7	1.17	88	1.95556	0.6	0	0.85
GSK3A	P49840	19	2.11	143	3.17778	0.66	0	0.89	6	1	143	3.17778	0.31	0	0.89	8	1.33	143	3.17778	0.42	0	0.89
GSK3B	P49841	18	2	133	2.95556	0.68	0	0.87	15	2.5	133	2.95556	0.85	0	0.85	15	2.5	133	2.95556	0.85	0	0.87
GSPT1	P15170	14	1.56	147	3.26667	0.48	0	0.87	5	0.83	147	3.26667	0.26	0	0.89	4	0.67	147	3.26667	0.2	0	0.89
GSPT2	Q8IYD1	3	0.33	20	0.444444	0.75	0	0.89	2	0.33	20	0.444444	0.75	0	0.89	3	0.5	20	0.444444	1.12	0	0.89
GSR	P00390															1	0.17	17	0.377778	0.44	0	0.89
GSTCD	Q8NEC7	8	0.89	85	1.88889	0.47	0	0.86								3	0.5	85	1.88889	0.26	0	0.89
GSTM2	P28161	1	0.11	52	1.15556	0.1	0	0.89
GSTM3	P21266
GSTO1	P78417	17	1.89	91	2.02222	0.93	0	0.83	15	2.5	91	2.02222	1.24	0.02	0.78	10	1.67	91	2.02222	0.82	0	0.82
GSTP1	P09211	19	2.11	153	3.4	0.62	0	0.87	15	2.5	153	3.4	0.74	0	0.85	20	3.33	153	3.4	0.98	0	0.85
GTF2A1	P52655	116	12.89	179	3.97778	3.24	0.37	0.35	219	36.5	179	3.97778	9.18	1	0	197	32.83	179	3.97778	8.25	1	0
GTF2A2	P52657	8	0.89	33	0.733333	1.21	0.02	0.76	2	0.33	33	0.733333	0.45	0	0.89	5	0.83	33	0.733333	1.14	0	0.89
GTF2B	Q00403	6	0.67	99	2.2	0.3	0	0.86	14	2.33	99	2.2	1.06	0.01	0.82	24	4	99	2.2	1.82	0.04	0.73
GTF2E1	P29083	130	14.44	239	5.31111	2.72	0.12	0.61	84	14	239	5.31111	2.64	0.06	0.7	94	15.67	239	5.31111	2.95	0.12	0.62
GTF2E2	P29084	92	10.22	226	5.02222	2.04	0.01	0.79	86	14.33	226	5.02222	2.85	0.17	0.53	103	17.17	226	5.02222	3.42	0.25	0.47
GTF2F1	P35269	131	14.56	251	5.57778	2.61	0.08	0.67	96	16	251	5.57778	2.87	0.14	0.57	116	19.33	251	5.57778	3.47	0.3	0.41
GTF2F2	P13984	111	12.33	205	4.55556	2.71	0.29	0.42	67	11.17	205	4.55556	2.45	0.05	0.72	59	9.83	205	4.55556	2.16	0.05	0.7
GTF2H1	P32780	36	4	81	1.8	2.22	0.06	0.69	29	4.83	81	1.8	2.69	0.09	0.65	15	2.5	81	1.8	1.39	0.01	0.79
GTF2H2	Q13888	8	0.89	35	0.777778	1.14	0.01	0.81	9	1.5	35	0.777778	1.93	0.05	0.71	3	0.5	35	0.777778	0.64	0	0.89
GTF2H2C; GTF2H2C_2	Q6P1K8	9	1	20	0.444444	2.25	0.07	0.68	5	0.83	20	0.444444	1.88	0.03	0.75	5	0.83	20	0.444444	1.88	0.05	0.71
GTF2H3	Q13889	5	0.56	5	0.111111	5	0.08	0.67	7	1.17	5	0.111111	10.5	0.27	0.44	7	1.17	5	0.111111	10.5	0.16	0.55
GTF2H4	Q92759	4	0.44	25	0.555556	0.8	0.02	0.78	9	1.5	25	0.555556	2.7	0.09	0.65	2	0.33	25	0.555556	0.6	0.02	0.76
GTF2H5	Q6ZYL4	2	0.22	2	0.0444444	2.22	0	0.89	1	0.17	2	0.0444444	1.67	0	0.89	3	0.5	2	0.0444444	5	0	0.89
GTF2I	P78347	65	7.22	275	6.11111	1.18	0	0.88	73	12.17	275	6.11111	1.99	0	0.83	82	13.67	275	6.11111	2.24	0	0.82
GTF3C1	Q12789	55	6.11	219	4.86667	1.26	0	0.87	61	10.17	219	4.86667	2.09	0	0.82	48	8	219	4.86667	1.64	0	0.84
GTF3C2	Q8WUA4	21	2.33	40	0.888889	2.63	0.1	0.65	26	4.33	40	0.888889	4.88	0.32	0.4	23	3.83	40	0.888889	4.31	0.25	0.46
GTF3C3	Q9Y5Q9	67	7.44	151	3.35556	2.22	0.15	0.56	61	10.17	151	3.35556	3.03	0.25	0.46	45	7.5	151	3.35556	2.24	0.02	0.76
GTF3C4	Q9UKN8	199	22.11	473	10.5111	2.1	0	0.86	136	22.67	473	10.5111	2.16	0	0.85	176	29.33	473	10.5111	2.79	0.02	0.76
GTF3C5	Q9Y5Q8	97	10.78	319	7.08889	1.52	0	0.86	60	10	319	7.08889	1.41	0	0.87	60	10	319	7.08889	1.41	0	0.86
GTF3C6	Q969F1	10	1.11	20	0.444444	2.5	0.09	0.66	3	0.5	20	0.444444	1.12	0	0.89	6	1	20	0.444444	2.25	0	0.89
GTPBP1	O00178	17	1.89	165	3.66667	0.52	0	0.88	10	1.67	165	3.66667	0.45	0	0.89	12	2	165	3.66667	0.55	0	0.87
GTPBP4	Q9BZE4	1	0.11	45	1	0.11	0	0.89
GTSE1	Q9NYZ3	14	1.56	24	0.533333	2.92	0.08	0.67	12	2	24	0.533333	3.75	0.19	0.52	13	2.17	24	0.533333	4.06	0.18	0.53
GYG1	P46976															1	0.17	1	0.0222222	1.67	0	0.89
GYS1	P13807
GZF1	Q9H116	1	0.11	0	0	1.11	0	0.89	2	0.33	0	0	3.33	0	0.89	3	0.5	0	0	5	0	0.89
H1-0	P07305								2	0.33	20	0.444444	0.75	0	0.89	2	0.33	20	0.444444	0.75	0	0.89
H1-10	Q92522	1	0.11	46	1.02222	0.11	0	0.89	1	0.17	46	1.02222	0.16	0	0.89
H1-2	P16403	8	0.89	9	0.2	4.44	0.12	0.62	6	1	9	0.2	5	0.13	0.58	5	0.83	9	0.2	4.17	0.07	0.68
H1-3	P16402	44	4.89	356	7.91111	0.62	0	0.89	30	5	356	7.91111	0.63	0	0.89	28	4.67	356	7.91111	0.59	0	0.89
H1-4	P10412	1	0.11	10	0.222222	0.5	0	0.89	1	0.17	10	0.222222	0.75	0	0.89
H1-5	P16401															1	0.17	1	0.0222222	1.67	0	0.89
H2AC20	Q16777	248	27.56	825	18.3333	1.5	0	0.87	310	51.67	825	18.3333	2.82	0.05	0.71	290	48.33	825	18.3333	2.64	0.01	0.81
H2AC21	Q8IUE6	14	1.56	105	2.33333	0.67	0	0.84	28	4.67	105	2.33333	2	0.07	0.68	9	1.5	105	2.33333	0.64	0	0.86
H2AX	P16104	11	1.22	38	0.844444	1.45	0.03	0.74	34	5.67	38	0.844444	6.71	0.5	0.25	8	1.33	38	0.844444	1.58	0.05	0.72
H2AZ2	Q71UI9	28	3.11	118	2.62222	1.19	0	0.85	19	3.17	118	2.62222	1.21	0	0.84	22	3.67	118	2.62222	1.4	0	0.82
H2BC13	Q99880	26	2.89	124	2.75556	1.05	0	0.85	24	4	124	2.75556	1.45	0.06	0.69	14	2.33	124	2.75556	0.85	0	0.85
H2BC18	Q5QNW6	500	55.56	2156	47.9111	1.16	0	0.89	493	82.17	2156	47.9111	1.71	0	0.89	490	81.67	2156	47.9111	1.7	0	0.89
H2BC20P	Q6DN03	38	4.22	124	2.75556	1.53	0.06	0.69	18	3	124	2.75556	1.09	0	0.83	19	3.17	124	2.75556	1.15	0	0.84
H2BC21	Q16778	17	1.89	73	1.62222	1.16	0.01	0.8	13	2.17	73	1.62222	1.34	0.07	0.68	21	3.5	73	1.62222	2.16	0.07	0.68
H3-3A; H3-3B	P84243	3	0.33	42	0.933333	0.36	0	0.89								1	0.17	42	0.933333	0.18	0	0.89
H3C1; H3C2; H3C3; H3C4; H3C6; H3C7; H3C8; H3C10; H3C11; H3C12	P68431															1	0.17	20	0.444444	0.38	0	0.89
H3C15; H3C14; H3C13	Q71DI3	4	0.44	96	2.13333	0.21	0	0.89
H4C1; H4C2; H4C3; H4C4; H4C5; H4C6; H4C8; H4C9; H4C11; H4C12; H4C13; H4C14; H4C15; H4-16	P62805	655	72.78	2629	58.4222	1.25	0	0.89	612	102	2629	58.4222	1.75	0	0.89	560	93.33	2629	58.4222	1.6	0	0.89
HABP4	Q5JVS0	2	0.22	33	0.733333	0.3	0	0.89
HACD3	Q9P035	48	5.33	201	4.46667	1.19	0	0.86	32	5.33	201	4.46667	1.19	0	0.86	37	6.17	201	4.46667	1.38	0	0.86
HADH	Q16836	2	0.22	18	0.4	0.56	0	0.89	3	0.5	18	0.4	1.25	0.06	0.69	1	0.17	18	0.4	0.42	0	0.89
HADHA	P40939	5	0.56	55	1.22222	0.45	0	0.82	10	1.67	55	1.22222	1.36	0.04	0.73	6	1	55	1.22222	0.82	0.01	0.79
HADHB	P55084	2	0.22	10	0.222222	1	0	0.89	1	0.17	10	0.222222	0.75	0	0.89
HAGH	Q16775	3	0.33	24	0.533333	0.62	0	0.89
HARS1	P12081	4	0.44	143	3.17778	0.14	0	0.89	2	0.33	143	3.17778	0.1	0	0.89	2	0.33	143	3.17778	0.1	0	0.89
HAT1	O14929	50	5.56	220	4.88889	1.14	0	0.87	49	8.17	220	4.88889	1.67	0	0.86	53	8.83	220	4.88889	1.81	0	0.84
HAUS1	Q96CS2	3	0.33	25	0.555556	0.6	0	0.89	1	0.17	25	0.555556	0.3	0	0.89	1	0.17	25	0.555556	0.3	0	0.89
HAUS2	Q9NVX0	3	0.33	14	0.311111	1.07	0	0.89
HAUS3	Q68CZ6	3	0.33	23	0.511111	0.65	0	0.89
HAUS4	Q9H6D7	1	0.11	11	0.244444	0.45	0	0.89
HAUS5	O94927	6	0.67	19	0.422222	1.58	0.02	0.77								1	0.17	19	0.422222	0.39	0	0.89
HAUS6	Q7Z4H7	9	1	102	2.26667	0.44	0	0.86
HAUS7	Q99871	4	0.44	25	0.555556	0.8	0	0.89	2	0.33	25	0.555556	0.6	0	0.89	3	0.5	25	0.555556	0.9	0	0.89
HAUS8	Q9BT25	4	0.44	41	0.911111	0.49	0.02	0.78
HAX1	O00165	4	0.44	21	0.466667	0.95	0	0.89	2	0.33	21	0.466667	0.71	0	0.89	2	0.33	21	0.466667	0.71	0.04	0.73
HBS1L	Q9Y450	74	8.22	618	13.7333	0.6	0	0.89	19	3.17	618	13.7333	0.23	0	0.89	34	5.67	618	13.7333	0.41	0	0.89
HCFC1	P51610	483	53.67	976	21.6889	2.47	0.01	0.81	240	40	976	21.6889	1.84	0	0.89	128	21.33	976	21.6889	0.98	0	0.89
HCFC2	Q9Y5Z7	1	0.11	4	0.0888889	1.11	0	0.89	1	0.17	4	0.0888889	1.67	0	0.89
HCLS1	P14317
HCN1	O60741
HDAC1	Q13547	47	5.22	124	2.75556	1.9	0.02	0.76	45	7.5	124	2.75556	2.72	0.07	0.68	27	4.5	124	2.75556	1.63	0.01	0.79
HDAC2	Q92769	115	12.78	224	4.97778	2.57	0.08	0.67	69	11.5	224	4.97778	2.31	0.02	0.77	53	8.83	224	4.97778	1.77	0.02	0.76
HDAC3	O15379	14	1.56	8	0.177778	8.75	0.36	0.36	9	1.5	8	0.177778	8.44	0.38	0.35	1	0.17	8	0.177778	0.94	0	0.89
HDAC5	Q9UQL6	49	5.44	10	0.222222	24.5	0.98	0.01	20	3.33	10	0.222222	15	0.71	0.11	10	1.67	10	0.222222	7.5	0.26	0.45
HDAC6	Q9UBN7	5	0.56	61	1.35556	0.41	0	0.89	4	0.67	61	1.35556	0.49	0	0.82	2	0.33	61	1.35556	0.25	0	0.89
HDDC2	Q7Z4H3	46	5.11	119	2.64444	1.93	0.07	0.68	24	4	119	2.64444	1.51	0.02	0.77	36	6	119	2.64444	2.27	0.08	0.67
HDDC3	Q8N4P3	3	0.33	4	0.0888889	3.33	0	0.89	2	0.33	4	0.0888889	3.33	0	0.89	2	0.33	4	0.0888889	3.33	0	0.89
HDGF	P51858	78	8.67	422	9.37778	0.92	0	0.89	71	11.83	422	9.37778	1.26	0	0.88	85	14.17	422	9.37778	1.51	0	0.87
HDGFL2	Q7Z4V5	44	4.89	171	3.8	1.29	0	0.85	38	6.33	171	3.8	1.67	0	0.84	28	4.67	171	3.8	1.23	0	0.86
HDGFL3	Q9Y3E1								1	0.17	0	0	1.67	0	0.89	2	0.33	0	0	3.33	0	0.89
HDHD5	Q9BXW7
HDLBP	Q00341	292	32.44	2089	46.4222	0.7	0	0.89	79	13.17	2089	46.4222	0.28	0	0.89	141	23.5	2089	46.4222	0.51	0	0.89
HEATR1	Q9H583	1	0.11	28	0.622222	0.18	0	0.89
HEATR3	Q7Z4Q2	1	0.11	13	0.288889	0.38	0	0.89	4	0.67	13	0.288889	2.31	0	0.89	6	1	13	0.288889	3.46	0.11	0.64
HEATR5B	Q9P2D3	4	0.44	24	0.533333	0.83	0.01	0.78	2	0.33	24	0.533333	0.62	0	0.89	1	0.17	24	0.533333	0.31	0	0.89
HEBP1	Q9NRV9	2	0.22	11	0.244444	0.91	0	0.89
HEBP2	Q9Y5Z4	4	0.44	24	0.533333	0.83	0.02	0.78
HECA	Q9UBI9	9	1	37	0.822222	1.22	0.03	0.74								2	0.33	37	0.822222	0.41	0	0.89
HECTD1	Q9ULT8	5	0.56	197	4.37778	0.13	0	0.89	2	0.33	197	4.37778	0.08	0	0.89	9	1.5	197	4.37778	0.34	0	0.89
HELB	Q8NG08	3	0.33	6	0.133333	2.5	0	0.89	8	1.33	6	0.133333	10	0.22	0.49	3	0.5	6	0.133333	3.75	0	0.89
HELLS	Q9NRZ9	17	1.89	68	1.51111	1.25	0.01	0.81	20	3.33	68	1.51111	2.21	0.04	0.73	18	3	68	1.51111	1.99	0.05	0.72
HELZ	P42694															2	0.33	98	2.17778	0.15	0	0.89
HELZ2	Q9BYK8	1	0.11	0	0	1.11	0	0.89
HERC5	Q9UII4	1	0.11	21	0.466667	0.24	0	0.89
HERC6	Q8IVU3	2	0.22	2	0.0444444	2.22	0	0.89
HEXIM1	O94992	41	4.56	133	2.95556	1.54	0.01	0.81	42	7	133	2.95556	2.37	0.06	0.7	36	6	133	2.95556	2.03	0.02	0.78
HGH1	Q9BTY7															3	0.5	4	0.0888889	5	0.13	0.59
HGS	O14964	13	1.44	67	1.48889	0.97	0.02	0.76
HIC2	Q96JB3	4	0.44	4	0.0888889	4.44	0	0.89	1	0.17	4	0.0888889	1.67	0	0.89
HIKESHI	Q53FT3
HINT1	P49773	29	3.22	297	6.6	0.49	0	0.88	5	0.83	297	6.6	0.13	0	0.89	8	1.33	297	6.6	0.2	0	0.89
HIRA	P54198	28	3.11	12	0.266667	11.67	0.56	0.2	15	2.5	12	0.266667	9.38	0.52	0.23	7	1.17	12	0.266667	4.38	0.11	0.63
HIRIP3	Q9BW71	8	0.89	75	1.66667	0.53	0	0.83	9	1.5	75	1.66667	0.9	0	0.82	8	1.33	75	1.66667	0.8	0	0.83
HIVEP1	P15822	7	0.78	1	0.0222222	7.78	0.09	0.66	6	1	1	0.0222222	10	0.26	0.45	3	0.5	1	0.0222222	5	0.13	0.59
HLA-B	P01889
HLCS	P50747	40	4.44	123	2.73333	1.63	0.07	0.68	5	0.83	123	2.73333	0.3	0	0.89	11	1.83	123	2.73333	0.67	0	0.86
HLTF	Q14527	3	0.33	3	0.0666667	3.33	0	0.89	1	0.17	3	0.0666667	1.67	0	0.89
HM13	Q8TCT9	5	0.56	69	1.53333	0.36	0	0.89	1	0.17	69	1.53333	0.11	0	0.89	1	0.17	69	1.53333	0.11	0	0.89
HMCES	Q96FZ2	15	1.67	21	0.466667	3.57	0.13	0.58	17	2.83	21	0.466667	6.07	0.32	0.39	14	2.33	21	0.466667	5	0.23	0.49
HMG20A	Q9NP66	19	2.11	61	1.35556	1.56	0.09	0.65	30	5	61	1.35556	3.69	0.36	0.36	19	3.17	61	1.35556	2.34	0.1	0.64
HMGA1	P17096	11	1.22	105	2.33333	0.52	0	0.86	13	2.17	105	2.33333	0.93	0	0.85	12	2	105	2.33333	0.86	0	0.85
HMGA2	P52926	23	2.56	79	1.75556	1.46	0.05	0.71	36	6	79	1.75556	3.42	0.37	0.36	38	6.33	79	1.75556	3.61	0.43	0.3
HMGB1	P09429	45	5	346	7.68889	0.65	0	0.89	44	7.33	346	7.68889	0.95	0	0.88	60	10	346	7.68889	1.3	0	0.88
HMGB2	P26583	18	2	129	2.86667	0.7	0	0.85	4	0.67	129	2.86667	0.23	0	0.89	13	2.17	129	2.86667	0.76	0	0.87
HMGB3	O15347	16	1.78	128	2.84444	0.62	0	0.87	16	2.67	128	2.84444	0.94	0	0.86	32	5.33	128	2.84444	1.87	0.01	0.81
HMGCS1	Q01581	3	0.33	299	6.64444	0.05	0	0.89	3	0.5	299	6.64444	0.08	0	0.89	2	0.33	299	6.64444	0.05	0	0.89
HMGN1	P05114	4	0.44	7	0.155556	2.86	0.13	0.58	4	0.67	7	0.155556	4.29	0.1	0.64	7	1.17	7	0.155556	7.5	0.25	0.47
HMGXB4	Q9UGU5	24	2.67	39	0.866667	3.08	0.19	0.52	18	3	39	0.866667	3.46	0.26	0.45	10	1.67	39	0.866667	1.92	0.04	0.73
HMMR	O75330
HMOX2	P30519	1	0.11	52	1.15556	0.1	0	0.89
HMX1	Q9NP08								2	0.33	0	0	3.33	0	0.89	3	0.5	0	0	5	0.13	0.59
HMX3	A6NHT5															1	0.17	0	0	1.67	0	0.89
HNRNPA0	Q13151	44	4.89	240	5.33333	0.92	0	0.88	34	5.67	240	5.33333	1.06	0	0.87	40	6.67	240	5.33333	1.25	0	0.87
HNRNPA1	P09651	106	11.78	1337	29.7111	0.4	0	0.89	97	16.17	1337	29.7111	0.54	0	0.89	191	31.83	1337	29.7111	1.07	0	0.89
HNRNPA1L2	Q32P51	1	0.11	0	0	1.11	0	0.89								1	0.17	0	0	1.67	0	0.89
HNRNPA2B1	P22626	130	14.44	809	17.9778	0.8	0	0.89	98	16.33	809	17.9778	0.91	0	0.89	93	15.5	809	17.9778	0.86	0	0.89
HNRNPA3	P51991	72	8	454	10.0889	0.79	0	0.89	55	9.17	454	10.0889	0.91	0	0.89	66	11	454	10.0889	1.09	0	0.89
HNRNPAB	Q99729	31	3.44	201	4.46667	0.77	0	0.88	22	3.67	201	4.46667	0.82	0	0.87	32	5.33	201	4.46667	1.19	0	0.87
HNRNPC	P07910	83	9.22	370	8.22222	1.12	0	0.88	60	10	370	8.22222	1.22	0	0.88	50	8.33	370	8.22222	1.01	0	0.88
HNRNPD	Q14103	58	6.44	217	4.82222	1.34	0	0.86	42	7	217	4.82222	1.45	0	0.87	50	8.33	217	4.82222	1.73	0	0.85
HNRNPDL	O14979	20	2.22	192	4.26667	0.52	0	0.88	25	4.17	192	4.26667	0.98	0	0.88	28	4.67	192	4.26667	1.09	0	0.87
HNRNPF	P52597	88	9.78	805	17.8889	0.55	0	0.89	68	11.33	805	17.8889	0.63	0	0.89	81	13.5	805	17.8889	0.75	0	0.89
HNRNPH1	P31943	37	4.11	354	7.86667	0.52	0	0.89	36	6	354	7.86667	0.76	0	0.89	28	4.67	354	7.86667	0.59	0	0.89
HNRNPH2	P55795	7	0.78	97	2.15556	0.36	0	0.89	16	2.67	97	2.15556	1.24	0	0.82	18	3	97	2.15556	1.39	0.02	0.78
HNRNPH3	P31942	7	0.78	154	3.42222	0.23	0	0.89	17	2.83	154	3.42222	0.83	0	0.86	13	2.17	154	3.42222	0.63	0	0.86
HNRNPK	P61978	382	42.44	1730	38.4444	1.1	0	0.89	369	61.5	1730	38.4444	1.6	0	0.89	632	105.33	1730	38.4444	2.74	0	0.87
HNRNPL	P14866	131	14.56	1085	24.1111	0.6	0	0.89	96	16	1085	24.1111	0.66	0	0.89	119	19.83	1085	24.1111	0.82	0	0.89
HNRNPM	P52272	151	16.78	899	19.9778	0.84	0	0.89	110	18.33	899	19.9778	0.92	0	0.89	127	21.17	899	19.9778	1.06	0	0.89
HNRNPR	O43390	130	14.44	457	10.1556	1.42	0	0.87	122	20.33	457	10.1556	2	0	0.87	117	19.5	457	10.1556	1.92	0	0.86
HNRNPU	Q00839	157	17.44	748	16.6222	1.05	0	0.89	118	19.67	748	16.6222	1.18	0	0.89	123	20.5	748	16.6222	1.23	0	0.89
HNRNPUL1	Q9BUJ2	68	7.56	252	5.6	1.35	0	0.87	57	9.5	252	5.6	1.7	0	0.85	78	13	252	5.6	2.32	0.01	0.8
HNRNPUL2	Q1KMD3	11	1.22	65	1.44444	0.85	0.01	0.78	12	2	65	1.44444	1.38	0.03	0.75	11	1.83	65	1.44444	1.27	0.04	0.72
HOMER1	Q86YM7
HOMER2	Q9NSB8								1	0.17	0	0	1.67	0	0.89	2	0.33	0	0	3.33	0.13	0.59
HOOK3	Q86VS8
HOXA4	Q00056								1	0.17	0	0	1.67	0	0.89
HOXA5	P20719															2	0.33	0	0	3.33	0	0.89
HOXB9	P17482								1	0.17	5	0.111111	1.5	0	0.89	5	0.83	5	0.111111	7.5	0	0.89
HOXC10	Q9NYD6	1	0.11	0	0	1.11	0	0.89								3	0.5	0	0	5	0	0.89
HOXC13	P31276															4	0.67	0	0	6.67	0	0.89
HOXC9	P31274								2	0.33	0	0	3.33	0	0.89	10	1.67	0	0	16.67	0.45	0.29
HOXD11	P31277	5	0.56	34	0.755556	0.74	0.02	0.76	7	1.17	34	0.755556	1.54	0.11	0.63	8	1.33	34	0.755556	1.76	0.11	0.63
HOXD13	P35453								4	0.67	3	0.0666667	6.67	0.13	0.59	14	2.33	3	0.0666667	23.33	0.71	0.12
HOXD4	P09016	2	0.22	9	0.2	1.11	0.05	0.72	3	0.5	9	0.2	2.5	0	0.89	6	1	9	0.2	5	0.2	0.51
HP1BP3	Q5SSJ5	78	8.67	176	3.91111	2.22	0.04	0.72	55	9.17	176	3.91111	2.34	0.03	0.75	60	10	176	3.91111	2.56	0.08	0.67
HPF1	Q9NWY4	2	0.22	9	0.2	1.11	0	0.89	1	0.17	9	0.2	0.83	0	0.89	2	0.33	9	0.2	1.67	0	0.89
HPRT1	P00492	24	2.67	120	2.66667	1	0	0.85	11	1.83	120	2.66667	0.69	0	0.86	6	1	120	2.66667	0.38	0	0.89
HROB	Q8N3J3	2	0.22	0	0	2.22	0	0.89	1	0.17	0	0	1.67	0	0.89	2	0.33	0	0	3.33	0	0.89
HS1BP3	Q53T59	21	2.33	245	5.44444	0.43	0	0.89	6	1	245	5.44444	0.18	0	0.89	11	1.83	245	5.44444	0.34	0	0.89
HSBP1	O75506	4	0.44	39	0.866667	0.51	0.01	0.81	4	0.67	39	0.866667	0.77	0	0.89	1	0.17	39	0.866667	0.19	0	0.89
HSD11B1L	Q7Z5J1
HSD17B10	Q99714	30	3.33	96	2.13333	1.56	0.03	0.75	27	4.5	96	2.13333	2.11	0.06	0.7	27	4.5	96	2.13333	2.11	0.06	0.7
HSD17B12	Q53GQ0	17	1.89	66	1.46667	1.29	0.01	0.79	10	1.67	66	1.46667	1.14	0.01	0.81	9	1.5	66	1.46667	1.02	0	0.82
HSD17B4	P51659	1	0.11	232	5.15556	0.02	0	0.89	1	0.17	232	5.15556	0.03	0	0.89
HSDL2	Q6YN16
HSF1	Q00613								5	0.83	11	0.244444	3.41	0.11	0.62	5	0.83	11	0.244444	3.41	0.06	0.7
HSP90AA1	P07900	64	7.11	770	17.1111	0.42	0	0.89	59	9.83	770	17.1111	0.57	0	0.89	40	6.67	770	17.1111	0.39	0	0.89
HSP90AB1	P08238	94	10.44	828	18.4	0.57	0	0.89	64	10.67	828	18.4	0.58	0	0.89	75	12.5	828	18.4	0.68	0	0.89
HSP90AB2P	Q58FF8	5	0.56	64	1.42222	0.39	0	0.83	20	3.33	64	1.42222	2.34	0.09	0.65	18	3	64	1.42222	2.11	0.18	0.53
HSP90AB4P	Q58FF6	1	0.11	20	0.444444	0.25	0	0.89
HSP90B1	P14625	51	5.67	245	5.44444	1.04	0	0.84	22	3.67	245	5.44444	0.67	0	0.87	14	2.33	245	5.44444	0.43	0	0.89
HSPA14	Q0VDF9	2	0.22	19	0.422222	0.53	0	0.89	3	0.5	19	0.422222	1.18	0.03	0.75
HSPA1B	P0DMV9	1470	163.33	12333	274.067	0.6	0	0.89	1246	207.67	12333	274.067	0.76	0	0.89	1232	205.33	12333	274.067	0.75	0	0.89
HSPA1L	P34931								2	0.33	31	0.688889	0.48	0	0.89	2	0.33	31	0.688889	0.48	0	0.89
HSPA2	P54652	10	1.11	16	0.355556	3.12	0.08	0.67	5	0.83	16	0.355556	2.34	0.08	0.67	2	0.33	16	0.355556	0.94	0	0.89
HSPA4	P34932	269	29.89	1184	26.3111	1.14	0	0.89	221	36.83	1184	26.3111	1.4	0	0.89	210	35	1184	26.3111	1.33	0	0.89
HSPA4L	O95757	57	6.33	409	9.08889	0.7	0	0.89	53	8.83	409	9.08889	0.97	0	0.89	48	8	409	9.08889	0.88	0	0.89
HSPA5	P11021	418	46.44	1448	32.1778	1.44	0	0.89	274	45.67	1448	32.1778	1.42	0	0.89	249	41.5	1448	32.1778	1.29	0	0.89
HSPA6	P17066	85	9.44	846	18.8	0.5	0	0.89	33	5.5	846	18.8	0.29	0	0.89	29	4.83	846	18.8	0.26	0	0.89
HSPA8	P11142	1314	146	3518	78.1778	1.87	0	0.89	1013	168.83	3518	78.1778	2.16	0	0.89	1001	166.83	3518	78.1778	2.13	0	0.89
HSPA9	P38646	346	38.44	1426	31.6889	1.21	0	0.89	223	37.17	1426	31.6889	1.17	0	0.89	202	33.67	1426	31.6889	1.06	0	0.89
HSPB1	P04792	34	3.78	334	7.42222	0.51	0	0.89	17	2.83	334	7.42222	0.38	0	0.89	19	3.17	334	7.42222	0.43	0	0.89
HSPB11	Q9Y547	7	0.78	104	2.31111	0.34	0	0.86	1	0.17	104	2.31111	0.07	0	0.89	2	0.33	104	2.31111	0.14	0	0.89
HSPB8	Q9UJY1	4	0.44	30	0.666667	0.67	0.01	0.8	3	0.5	30	0.666667	0.75	0	0.89	13	2.17	30	0.666667	3.25	0.13	0.61
HSPBP1	Q9NZL4								2	0.33	120	2.66667	0.12	0	0.89	1	0.17	120	2.66667	0.06	0	0.89
HSPD1	P10809	108	12	816	18.1333	0.66	0	0.89	80	13.33	816	18.1333	0.74	0	0.89	68	11.33	816	18.1333	0.62	0	0.89
HSPE1	P61604	2	0.22	109	2.42222	0.09	0	0.89	4	0.67	109	2.42222	0.28	0	0.89	2	0.33	109	2.42222	0.14	0	0.89
HSPH1	Q92598	149	16.56	870	19.3333	0.86	0	0.89	138	23	870	19.3333	1.19	0	0.89	151	25.17	870	19.3333	1.3	0	0.89
HTATSF1	O43719	149	16.56	326	7.24444	2.29	0.01	0.79	147	24.5	326	7.24444	3.38	0.3	0.41	106	17.67	326	7.24444	2.44	0.09	0.66
HTRA2	O43464								1	0.17	0	0	1.67	0	0.89	2	0.33	0	0	3.33	0	0.89
HTT	P42858								3	0.5	5	0.111111	4.5	0	0.89
HUS1	O60921															1	0.17	5	0.111111	1.5	0	0.89
HUWE1	Q7Z6Z7	15	1.67	69	1.53333	1.09	0.01	0.79	18	3	69	1.53333	1.96	0.03	0.74	8	1.33	69	1.53333	0.87	0	0.82
HYOU1	Q9Y4L1	6	0.67	71	1.57778	0.42	0	0.82	2	0.33	71	1.57778	0.21	0	0.89	2	0.33	71	1.57778	0.21	0	0.89
HYPK	Q9NX55	14	1.56	31	0.688889	2.26	0.11	0.63	5	0.83	31	0.688889	1.21	0.01	0.79	15	2.5	31	0.688889	3.63	0.17	0.54
IARS1	P41252	20	2.22	175	3.88889	0.57	0	0.87	4	0.67	175	3.88889	0.17	0	0.89
IARS2	Q9NSE4								1	0.17	22	0.488889	0.34	0	0.89
IBTK	Q9P2D0	2	0.22	30	0.666667	0.33	0	0.89
ICA1	Q05084
ICE1	Q9Y2F5	4	0.44	13	0.288889	1.54	0	0.89	9	1.5	13	0.288889	5.19	0.19	0.52	2	0.33	13	0.288889	1.15	0	0.89
ICE2	Q659A1	8	0.89	9	0.2	4.44	0.13	0.58	1	0.17	9	0.2	0.83	0	0.89
IDE	P14735	1	0.11	25	0.555556	0.2	0	0.89
IDH1	O75874	4	0.44	122	2.71111	0.16	0	0.89								4	0.67	122	2.71111	0.25	0	0.89
IDH2	P48735	1	0.11	26	0.577778	0.19	0	0.89
IDH3A	P50213	1	0.11	10	0.222222	0.5	0	0.89
IDH3B	O43837	1	0.11	22	0.488889	0.23	0	0.89
IDI1	Q13907	5	0.56	37	0.822222	0.68	0.01	0.79	2	0.33	37	0.822222	0.41	0	0.89	2	0.33	37	0.822222	0.41	0	0.89
IFIT5	Q13325	78	8.67	164	3.64444	2.38	0.19	0.52	14	2.33	164	3.64444	0.64	0	0.87	30	5	164	3.64444	1.37	0	0.84
IFRD1	O00458	2	0.22	9	0.2	1.11	0	0.89	1	0.17	9	0.2	0.83	0	0.89
IFT22	Q9H7X7
IFT27	Q9BW83	15	1.67	88	1.95556	0.85	0	0.83	11	1.83	88	1.95556	0.94	0	0.84	19	3.17	88	1.95556	1.62	0.01	0.8
IFT46	Q9NQC8	1	0.11	11	0.244444	0.45	0	0.89
IFT57	Q9NWB7	6	0.67	3	0.0666667	6.67	0.09	0.66	4	0.67	3	0.0666667	6.67	0	0.89	3	0.5	3	0.0666667	5	0	0.89
IFT74	Q96LB3	8	0.89	82	1.82222	0.49	0	0.85
IFT81	Q8WYA0
IGBP1	P78318	62	6.89	189	4.2	1.64	0.01	0.8	40	6.67	189	4.2	1.59	0	0.84	39	6.5	189	4.2	1.55	0	0.85
IGF2BP1	Q9NZI8	49	5.44	451	10.0222	0.54	0	0.89	42	7	451	10.0222	0.7	0	0.89	42	7	451	10.0222	0.7	0	0.89
IGF2BP2	Q9Y6M1	30	3.33	324	7.2	0.46	0	0.89	16	2.67	324	7.2	0.37	0	0.89	34	5.67	324	7.2	0.79	0	0.89
IGF2BP3	O00425	41	4.56	215	4.77778	0.95	0	0.86	33	5.5	215	4.77778	1.15	0	0.84	37	6.17	215	4.77778	1.29	0	0.85
IGHMBP2	P38935								1	0.17	26	0.577778	0.29	0	0.89
IGHV3-21	A0A0B4J1V1
IGKC	P01834
IGLC3	P0DOY3								2	0.33	2	0.0444444	3.33	0	0.89
IK	Q13123	91	10.11	255	5.66667	1.78	0.01	0.79	55	9.17	255	5.66667	1.62	0	0.86	56	9.33	255	5.66667	1.65	0	0.83
IKZF3	Q9UKT9								1	0.17	0	0	1.67	0	0.89	2	0.33	0	0	3.33	0	0.89
IL12B	P29460	1	0.11	3	0.0666667	1.11	0	0.89
IL17RE	Q8NFR9
ILF2	Q12905	168	18.67	550	12.2222	1.53	0	0.83	147	24.5	550	12.2222	2	0	0.87	122	20.33	550	12.2222	1.66	0	0.88
ILF3	Q12906	90	10	522	11.6	0.86	0	0.89	141	23.5	522	11.6	2.03	0	0.86	155	25.83	522	11.6	2.23	0	0.86
ILK	Q13418	23	2.56	140	3.11111	0.82	0.01	0.81	7	1.17	140	3.11111	0.38	0	0.89	14	2.33	140	3.11111	0.75	0	0.86
ILKAP	Q9H0C8	50	5.56	348	7.73333	0.72	0	0.89	40	6.67	348	7.73333	0.86	0	0.89	49	8.17	348	7.73333	1.06	0	0.88
ILRUN	Q9H6K1															2	0.33	32	0.711111	0.47	0	0.89
ILVBL	A1L0T0	4	0.44	6	0.133333	3.33	0	0.89	1	0.17	6	0.133333	1.25	0	0.89
IMMT	Q16891	16	1.78	71	1.57778	1.13	0	0.82	7	1.17	71	1.57778	0.74	0.01	0.8	2	0.33	71	1.57778	0.21	0	0.89
IMPA1	P29218	8	0.89	60	1.33333	0.67	0	0.83	1	0.17	60	1.33333	0.12	0	0.89	1	0.17	60	1.33333	0.12	0	0.89
IMPDH2	P12268	16	1.78	131	2.91111	0.61	0	0.87	11	1.83	131	2.91111	0.63	0	0.86	5	0.83	131	2.91111	0.29	0	0.89
INCENP	Q9NQS7	1	0.11	9	0.2	0.56	0	0.89	3	0.5	9	0.2	2.5	0	0.89	3	0.5	9	0.2	2.5	0.07	0.68
INF2	Q27J81								3	0.5	1	0.0222222	5	0.16	0.55
ING1	Q9UK53
ING3	Q9NXR8	4	0.44	12	0.266667	1.67	0	0.89	1	0.17	12	0.266667	0.62	0	0.89	1	0.17	12	0.266667	0.62	0	0.89
ING4	Q9UNL4	1	0.11	4	0.0888889	1.11	0	0.89	2	0.33	4	0.0888889	3.33	0	0.89	5	0.83	4	0.0888889	8.33	0.13	0.59
INO80	Q9ULG1	9	1	4	0.0888889	10	0.28	0.43	2	0.33	4	0.0888889	3.33	0	0.89	3	0.5	4	0.0888889	5	0.13	0.59
INO80B	Q9C086	6	0.67	13	0.288889	2.31	0	0.89	4	0.67	13	0.288889	2.31	0.05	0.71	3	0.5	13	0.288889	1.73	0	0.89
INO80C	Q6PI98	6	0.67	0	0	6.67	0.09	0.66
INO80E	Q8NBZ0	3	0.33	0	0	3.33	0	0.89	3	0.5	0	0	5	0	0.89
INPP5B	P32019	1	0.11	10	0.222222	0.5	0	0.89								3	0.5	10	0.222222	2.25	0.07	0.69
INPP5E	Q9NRR6								1	0.17	2	0.0444444	1.67	0	0.89
INPP5F	Q9Y2H2	32	3.56	54	1.2	2.96	0.17	0.54	3	0.5	54	1.2	0.42	0	0.89	2	0.33	54	1.2	0.28	0	0.83
INPPL1	O15357	26	2.89	278	6.17778	0.47	0	0.89	5	0.83	278	6.17778	0.13	0	0.89	6	1	278	6.17778	0.16	0	0.89
INTS1	Q8N201	6	0.67	31	0.688889	0.97	0.01	0.79	8	1.33	31	0.688889	1.94	0.03	0.74	1	0.17	31	0.688889	0.24	0	0.89
INTS11	Q5TA45	9	1	1	0.0222222	10	0.19	0.52	6	1	1	0.0222222	10	0.26	0.45	3	0.5	1	0.0222222	5	0	0.89
INTS12	Q96CB8	29	3.22	111	2.46667	1.31	0	0.82	15	2.5	111	2.46667	1.01	0	0.83	14	2.33	111	2.46667	0.95	0	0.85
INTS13	Q9NVM9	15	1.67	72	1.6	1.04	0.01	0.79	8	1.33	72	1.6	0.83	0	0.82	12	2	72	1.6	1.25	0.01	0.79
INTS14	Q96SY0	23	2.56	93	2.06667	1.24	0.01	0.81	20	3.33	93	2.06667	1.61	0.02	0.76	4	0.67	93	2.06667	0.32	0	0.89
INTS2	Q9H0H0	2	0.22	4	0.0888889	2.22	0	0.89
INTS3	Q68E01	28	3.11	151	3.35556	0.93	0	0.86	16	2.67	151	3.35556	0.79	0	0.87	16	2.67	151	3.35556	0.79	0	0.87
INTS4	Q96HW7	9	1	4	0.0888889	10	0.17	0.54	14	2.33	4	0.0888889	23.33	0.58	0.19	9	1.5	4	0.0888889	15	0.42	0.31
INTS7	Q9NVH2	8	0.89	14	0.311111	2.86	0.06	0.69	4	0.67	14	0.311111	2.14	0.05	0.72	3	0.5	14	0.311111	1.61	0.05	0.72
INTS8	Q75QN2
INTS9	Q9NV88	24	2.67	43	0.955556	2.79	0.15	0.57	31	5.17	43	0.955556	5.41	0.52	0.23	21	3.5	43	0.955556	3.66	0.23	0.48
IP6K1	Q92551	2	0.22	12	0.266667	0.83	0	0.89
IPMK	Q8NFU5	13	1.44	15	0.333333	4.33	0.19	0.52	11	1.83	15	0.333333	5.5	0.23	0.49	4	0.67	15	0.333333	2	0.04	0.72
IPO11	Q9UI26	4	0.44	25	0.555556	0.8	0	0.89	6	1	25	0.555556	1.8	0.04	0.73	3	0.5	25	0.555556	0.9	0.02	0.77
IPO4	Q8TEX9	3	0.33	6	0.133333	2.5	0	0.89	3	0.5	6	0.133333	3.75	0	0.89
IPO5	O00410								7	1.17	97	2.15556	0.54	0	0.89	4	0.67	97	2.15556	0.31	0	0.89
IPO7	O95373	20	2.22	255	5.66667	0.39	0	0.89	28	4.67	255	5.66667	0.82	0	0.88	21	3.5	255	5.66667	0.62	0	0.89
IPO8	O15397	5	0.56	184	4.08889	0.14	0	0.89	4	0.67	184	4.08889	0.16	0	0.89	3	0.5	184	4.08889	0.12	0	0.89
IPO9	Q96P70	2	0.22	72	1.6	0.14	0	0.89								1	0.17	72	1.6	0.1	0	0.89
IQCB1	Q15051	1	0.11	50	1.11111	0.1	0	0.89
IQCN	Q9H0B3															1	0.17	0	0	1.67	0	0.89
IQGAP1	P46940	2	0.22	156	3.46667	0.06	0	0.89	4	0.67	156	3.46667	0.19	0	0.89
IQSEC1	Q6DN90															1	0.17	17	0.377778	0.44	0	0.89
IRAK1	P51617	66	7.33	423	9.4	0.78	0	0.89	18	3	423	9.4	0.32	0	0.89	15	2.5	423	9.4	0.27	0	0.89
IRF2BP1	Q8IU81	12	1.33	77	1.71111	0.78	0.01	0.79	15	2.5	77	1.71111	1.46	0.03	0.75	13	2.17	77	1.71111	1.27	0.01	0.78
IRF2BP2	Q7Z5L9	36	4	237	5.26667	0.76	0	0.88	31	5.17	237	5.26667	0.98	0	0.88	17	2.83	237	5.26667	0.54	0	0.89
IRF2BPL	Q9H1B7	15	1.67	32	0.711111	2.34	0.09	0.65	6	1	32	0.711111	1.41	0.02	0.77	5	0.83	32	0.711111	1.17	0	0.89
IRF3	Q14653	1	0.11	31	0.688889	0.16	0	0.89	1	0.17	31	0.688889	0.24	0	0.89	4	0.67	31	0.688889	0.97	0	0.89
IRGQ	Q8WZA9	2	0.22	51	1.13333	0.2	0	0.89								1	0.17	51	1.13333	0.15	0	0.89
IRS2	Q9Y4H2	8	0.89	74	1.64444	0.54	0	0.85	6	1	74	1.64444	0.61	0	0.85	5	0.83	74	1.64444	0.51	0	0.84
IRS4	O14654	180	20	736	16.3556	1.22	0	0.89	90	15	736	16.3556	0.92	0	0.89	84	14	736	16.3556	0.86	0	0.89
IRX4	P78413															2	0.33	0	0	3.33	0	0.89
ISL2	Q96A47															1	0.17	0	0	1.67	0	0.89
ISOC1	Q96CN7	1	0.11	63	1.4	0.08	0	0.89	3	0.5	63	1.4	0.36	0	0.89	1	0.17	63	1.4	0.12	0	0.89
ISOC2	Q96AB3
IST1	P53990	6	0.67	297	6.6	0.1	0	0.89								1	0.17	297	6.6	0.03	0	0.89
ISY1	Q9ULR0	38	4.22	20	0.444444	9.5	0.71	0.12	24	4	20	0.444444	9	0.71	0.12	13	2.17	20	0.444444	4.88	0.25	0.46
ISYNA1	Q9NPH2	14	1.56	143	3.17778	0.49	0	0.89	11	1.83	143	3.17778	0.58	0	0.89	16	2.67	143	3.17778	0.84	0	0.87
ITCH	Q96J02								1	0.17	38	0.844444	0.2	0	0.89	3	0.5	38	0.844444	0.59	0.01	0.8
ITFG2	Q969R8	1	0.11	0	0	1.11	0	0.89	1	0.17	0	0	1.67	0	0.89	2	0.33	0	0	3.33	0	0.89
ITGAM	P11215	2	0.22	0	0	2.22	0	0.89
ITPA	Q9BY32	6	0.67	13	0.288889	2.31	0.03	0.74	6	1	13	0.288889	3.46	0.17	0.54	1	0.17	13	0.288889	0.58	0	0.89
ITPK1	Q13572	1	0.11	33	0.733333	0.15	0	0.89	8	1.33	33	0.733333	1.82	0.09	0.65	9	1.5	33	0.733333	2.05	0.06	0.69
ITPKB	P27987															2	0.33	4	0.0888889	3.33	0.13	0.61
ITPR3	Q14573
ITPRID2	P28290	2	0.22	21	0.466667	0.48	0	0.89
ITSN1	Q15811	1	0.11	4	0.0888889	1.11	0	0.89
ITSN2	Q9NZM3	5	0.56	34	0.755556	0.74	0.01	0.8	3	0.5	34	0.755556	0.66	0	0.89	1	0.17	34	0.755556	0.22	0	0.89
IWS1	Q96ST2	14	1.56	60	1.33333	1.17	0.01	0.79	24	4	60	1.33333	3	0.13	0.59	17	2.83	60	1.33333	2.13	0.06	0.69
JADE1	Q6IE81	1	0.11	4	0.0888889	1.11	0	0.89	1	0.17	4	0.0888889	1.67	0	0.89
JADE3	Q92613	2	0.22	9	0.2	1.11	0	0.89	6	1	9	0.2	5	0	0.89	3	0.5	9	0.2	2.5	0.07	0.68
JAK2	O60674								1	0.17	1	0.0222222	1.67	0	0.89	1	0.17	1	0.0222222	1.67	0	0.89
JHY	Q6NUN7								1	0.17	0	0	1.67	0	0.89	2	0.33	0	0	3.33	0	0.89
JMJD1C	Q15652	187	20.78	99	2.2	9.44	0.99	0	104	17.33	99	2.2	7.88	0.98	0.01	37	6.17	99	2.2	2.8	0.16	0.55
JMJD6	Q6NYC1	14	1.56	34	0.755556	2.06	0.11	0.63	22	3.67	34	0.755556	4.85	0.36	0.36	14	2.33	34	0.755556	3.09	0.13	0.61
JMY	Q8N9B5	10	1.11	20	0.444444	2.5	0.08	0.66	10	1.67	20	0.444444	3.75	0.2	0.51	5	0.83	20	0.444444	1.88	0.03	0.75
JPH1	Q9HDC5								1	0.17	14	0.311111	0.54	0	0.89
JPT1	Q9UK76	90	10	722	16.0444	0.62	0	0.89	70	11.67	722	16.0444	0.73	0	0.89	70	11.67	722	16.0444	0.73	0	0.89
JPT2	Q9H910	127	14.11	990	22	0.64	0	0.89	81	13.5	990	22	0.61	0	0.89	115	19.17	990	22	0.87	0	0.89
JUN	P05412	50	5.56	53	1.17778	4.72	0.4	0.32	45	7.5	53	1.17778	6.37	0.68	0.13	48	8	53	1.17778	6.79	0.72	0.11
JUNB	P17275								4	0.67	1	0.0222222	6.67	0.13	0.59	16	2.67	1	0.0222222	26.67	0.77	0.08
JUND	P17535	3	0.33	1	0.0222222	3.33	0.09	0.66	11	1.83	1	0.0222222	18.33	0.57	0.19	15	2.5	1	0.0222222	25	0.86	0.04
JUP	P14923	3	0.33	263	5.84444	0.06	0	0.89
KALRN	O60229	1	0.11	5	0.111111	1	0	0.89
KANK1	Q14678	4	0.44	6	0.133333	3.33	0.07	0.68	1	0.17	6	0.133333	1.25	0	0.89	1	0.17	6	0.133333	1.25	0	0.89
KANK2	Q63ZY3	2	0.22	13	0.288889	0.77	0	0.89	1	0.17	13	0.288889	0.58	0	0.89	2	0.33	13	0.288889	1.15	0	0.89
KANSL1	Q7Z3B3								1	0.17	0	0	1.67	0	0.89
KANSL2	Q9H9L4	4	0.44	0	0	4.44	0	0.89	4	0.67	0	0	6.67	0.13	0.59	2	0.33	0	0	3.33	0	0.89
KANSL3	Q9P2N6	8	0.89	2	0.0444444	8.89	0.17	0.54	1	0.17	2	0.0444444	1.67	0	0.89	1	0.17	2	0.0444444	1.67	0	0.89
KARS1	Q15046	7	0.78	115	2.55556	0.3	0	0.89
KAT14	Q9H8E8	13	1.44	1	0.0222222	14.44	0.39	0.34	2	0.33	1	0.0222222	3.33	0	0.89	1	0.17	1	0.0222222	1.67	0	0.89
KAT2A	Q92830								1	0.17	0	0	1.67	0	0.89
KAT2B	Q92831	2	0.22	0	0	2.22	0	0.89
KAT5	Q92993	3	0.33	6	0.133333	2.5	0	0.89	6	1	6	0.133333	7.5	0.11	0.62	4	0.67	6	0.133333	5	0	0.89
KAT6A	Q92794								1	0.17	1	0.0222222	1.67	0	0.89
KAT7	O95251	20	2.22	80	1.77778	1.25	0.01	0.8	25	4.17	80	1.77778	2.34	0.06	0.69	18	3	80	1.77778	1.69	0.04	0.72
KAT8	Q9H7Z6	6	0.67	13	0.288889	2.31	0.03	0.74	5	0.83	13	0.288889	2.88	0.1	0.64
KATNA1	O75449	6	0.67	48	1.06667	0.62	0	0.89	2	0.33	48	1.06667	0.31	0	0.89	5	0.83	48	1.06667	0.78	0	0.82
KATNAL1	Q9BW62	2	0.22	21	0.466667	0.48	0	0.89	1	0.17	21	0.466667	0.36	0	0.89	2	0.33	21	0.466667	0.71	0	0.89
KATNAL2	Q8IYT4	5	0.56	25	0.555556	1	0	0.89	2	0.33	25	0.555556	0.6	0.02	0.77	2	0.33	25	0.555556	0.6	0.02	0.77
KATNB1	Q9BVA0	10	1.11	48	1.06667	1.04	0.03	0.74	1	0.17	48	1.06667	0.16	0	0.89	3	0.5	48	1.06667	0.47	0	0.89
KATNBL1	Q9H079	3	0.33	6	0.133333	2.5	0.07	0.68	2	0.33	6	0.133333	2.5	0	0.89	3	0.5	6	0.133333	3.75	0	0.89
KAZN	Q674X7	1	0.11	5	0.111111	1	0	0.89
KBTBD2	Q8IY47								1	0.17	7	0.155556	1.07	0	0.89
KBTBD3	Q8NAB2								3	0.5	7	0.155556	3.21	0	0.89	5	0.83	7	0.155556	5.36	0.21	0.51
KBTBD6	Q86V97	3	0.33	6	0.133333	2.5	0	0.89	1	0.17	6	0.133333	1.25	0	0.89	1	0.17	6	0.133333	1.25	0	0.89
KCMF1	Q9P0J7	6	0.67	50	1.11111	0.6	0	0.83	4	0.67	50	1.11111	0.6	0	0.89	2	0.33	50	1.11111	0.3	0	0.89
KCTD1	Q719H9
KCTD12	Q96CX2	8	0.89	84	1.86667	0.48	0	0.86	3	0.5	84	1.86667	0.27	0	0.89	4	0.67	84	1.86667	0.36	0	0.89
KCTD5	Q9NXV2	2	0.22	55	1.22222	0.18	0	0.89	3	0.5	55	1.22222	0.41	0	0.89	2	0.33	55	1.22222	0.27	0	0.89
KCTD9	Q7L273
KDELR1	P24390
KDM1A	O60341	118	13.11	218	4.84444	2.71	0.18	0.52	76	12.67	218	4.84444	2.61	0.06	0.7	36	6	218	4.84444	1.24	0	0.84
KDM1B	Q8NB78	3	0.33	3	0.0666667	3.33	0	0.89	4	0.67	3	0.0666667	6.67	0.14	0.58
KDM2A	Q9Y2K7	8	0.89	22	0.488889	1.82	0.05	0.72	10	1.67	22	0.488889	3.41	0.24	0.48	16	2.67	22	0.488889	5.45	0.36	0.37
KDM2B	Q8NHM5	11	1.22	6	0.133333	9.17	0.28	0.43	9	1.5	6	0.133333	11.25	0.38	0.35	5	0.83	6	0.133333	6.25	0	0.89
KDM3A	Q9Y4C1	113	12.56	98	2.17778	5.77	0.65	0.15	144	24	98	2.17778	11.02	1	0	72	12	98	2.17778	5.51	0.74	0.1
KDM3B	Q7LBC6	364	40.44	624	13.8667	2.92	0.09	0.65	296	49.33	624	13.8667	3.56	0.35	0.37	192	32	624	13.8667	2.31	0	0.87
KDM4B	O94953	2	0.22	12	0.266667	0.83	0	0.89	4	0.67	12	0.266667	2.5	0.11	0.63	4	0.67	12	0.266667	2.5	0	0.89
KDM5A	P29375	12	1.33	0	0	13.33	0.45	0.28	7	1.17	0	0	11.67	0.29	0.42	1	0.17	0	0	1.67	0	0.89
KDM5C	P41229	2	0.22	0	0	2.22	0	0.89	9	1.5	0	0	15	0.51	0.23	2	0.33	0	0	3.33	0	0.89
KDM6A	O15550	15	1.67	11	0.244444	6.82	0.25	0.47	10	1.67	11	0.244444	6.82	0.31	0.4	3	0.5	11	0.244444	2.05	0	0.89
KDM6B	O15054								1	0.17	0	0	1.67	0	0.89
KDSR	Q06136	3	0.33	9	0.2	1.67	0	0.89
KEAP1	Q14145	3	0.33	14	0.311111	1.07	0.03	0.74
KHDC4	Q7Z7F0	18	2	66	1.46667	1.36	0.02	0.76	13	2.17	66	1.46667	1.48	0.02	0.77	15	2.5	66	1.46667	1.7	0.04	0.73
KHDRBS1	Q07666	83	9.22	381	8.46667	1.09	0	0.87	67	11.17	381	8.46667	1.32	0	0.88	72	12	381	8.46667	1.42	0	0.86
KHSRP	Q92945	239	26.56	955	21.2222	1.25	0	0.89	156	26	955	21.2222	1.23	0	0.89	151	25.17	955	21.2222	1.19	0	0.89
KIAA0100	Q14667
KIAA0319L	Q8IZA0
KIAA0930	Q6ICG6	6	0.67	9	0.2	3.33	0.05	0.72	3	0.5	9	0.2	2.5	0	0.89	5	0.83	9	0.2	4.17	0	0.89
KIAA1143	Q96AT1	8	0.89	59	1.31111	0.68	0.01	0.81	2	0.33	59	1.31111	0.25	0	0.89	3	0.5	59	1.31111	0.38	0	0.89
KIAA1191	Q96A73	1	0.11	80	1.77778	0.06	0	0.89
KIAA1217	Q5T5P2	2	0.22	33	0.733333	0.3	0	0.89
KIAA1522	Q9P206
KIAA1671	Q9BY89	7	0.78	126	2.8	0.28	0	0.89	3	0.5	126	2.8	0.18	0	0.89	2	0.33	126	2.8	0.12	0	0.89
KIDINS220	Q9ULH0	1	0.11	46	1.02222	0.11	0	0.89
KIF11	P52732	8	0.89	177	3.93333	0.23	0	0.88	1	0.17	177	3.93333	0.04	0	0.89	1	0.17	177	3.93333	0.04	0	0.89
KIF13B	Q9NQT8								1	0.17	56	1.24444	0.13	0	0.89
KIF15	Q9NS87	2	0.22	4	0.0888889	2.22	0	0.89	1	0.17	4	0.0888889	1.67	0	0.89
KIF16B	Q96L93	2	0.22	9	0.2	1.11	0.05	0.71
KIF18A	Q8NI77	1	0.11	1	0.0222222	1.11	0	0.89	3	0.5	1	0.0222222	5	0	0.89
KIF18B	Q86Y91								2	0.33	30	0.666667	0.5	0	0.89	5	0.83	30	0.666667	1.25	0.03	0.75
KIF1A	Q12756	1	0.11	19	0.422222	0.26	0	0.89	1	0.17	19	0.422222	0.39	0	0.89
KIF1B	O60333	5	0.56	146	3.24444	0.17	0	0.89								1	0.17	146	3.24444	0.05	0	0.89
KIF1C	O43896
KIF20A	O95235								3	0.5	14	0.311111	1.61	0.11	0.63	3	0.5	14	0.311111	1.61	0.05	0.72
KIF20B	Q96Q89	4	0.44	0	0	4.44	0	0.89	2	0.33	0	0	3.33	0	0.89
KIF21A	Q7Z4S6	6	0.67	97	2.15556	0.31	0	0.89	2	0.33	97	2.15556	0.15	0	0.89	1	0.17	97	2.15556	0.08	0	0.89
KIF22	Q14807	3	0.33	22	0.488889	0.68	0.02	0.78	3	0.5	22	0.488889	1.02	0.02	0.76	6	1	22	0.488889	2.05	0.02	0.76
KIF23	Q02241	58	6.44	45	1	6.44	0.75	0.09	19	3.17	45	1	3.17	0.24	0.48	18	3	45	1	3	0.15	0.57
KIF2A	O00139	72	8	206	4.57778	1.75	0.02	0.77	44	7.33	206	4.57778	1.6	0	0.83	47	7.83	206	4.57778	1.71	0	0.84
KIF2C	Q99661	15	1.67	62	1.37778	1.21	0.03	0.75	2	0.33	62	1.37778	0.24	0	0.89	13	2.17	62	1.37778	1.57	0.03	0.74
KIF3A	Q9Y496	4	0.44	34	0.755556	0.59	0.02	0.77
KIF3B	O15066	1	0.11	17	0.377778	0.29	0	0.89
KIF4A	O95239	98	10.89	107	2.37778	4.58	0.65	0.15	58	9.67	107	2.37778	4.07	0.56	0.2	38	6.33	107	2.37778	2.66	0.19	0.52
KIF4B	Q2VIQ3								1	0.17	0	0	1.67	0	0.89
KIF5B	P33176	168	18.67	760	16.8889	1.11	0	0.89	33	5.5	760	16.8889	0.33	0	0.89	23	3.83	760	16.8889	0.23	0	0.89
[truncated: 2,919 more rows]

## Sheet: 2. SAINTexpress output
Bait	Prey	PreyGene	Spec	SpecSum	AvgSpec	NumReplicates	ctrlCounts	AvgP	MaxP	TopoAvgP	TopoMaxP	SaintScore	logOddsScore	FoldChange	BFDR
TLK2-529	A0A0B4J2D5	GATD3B	4|5|3|3|2|3	20	3.33	6	0|0|0|0|0|0|0|0|0|0|0|0|0|0|0|0|0|0|3|2|3|1|0|0|0|0|1|1|1|1|1|1|1|0|0|0|0|1|0|0|0|0|2|3|3	0.37	0.74	0.37	0.74	0.37	-1.94	6	0.35
TLK2-529	A0AV96	RBM47	1|1|0|0|0|0	2	0.33	6	0|0|0|0|0|0|0|0|0|0|0|0|0|0|0|0|0|0|0|0|0|0|0|0|0|0|0|0|0|0|0|0|0|0|0|1|0|0|0|0|0|0|0|0|0	0	0	0	0	0	-3.34	3.33	0.89
TLK2-529	A0AVT1	UBA6	1|0|0|0|0|0	1	0.17	6	0|0|0|3|3|4|0|0|0|12|24|21|0|1|0|29|29|25|2|4|3|18|19|17|28|0|0|0|25|30|19|20|19|4|0|0|0|1|2|11|16|17|1|1|2	0	0	0	0	0	-40.71	0.02	0.89
TLK2-529	A0FGR8	ESYT2	2|2|1|1|1|0	7	1.17	6	0|1|0|9|10|12|0|2|2|10|17|15|2|2|1|19|16|17|4|3|5|8|10|11|20|3|4|4|18|18|18|21|21|12|7|4|6|5|5|9|12|10|4|5|5	0	0	0	0	0	-38.95	0.14	0.89
TLK2-529	A0JLT2	MED19	1|0|0|4|2|2	9	1.5	6	0|0|0|0|0|0|0|0|0|0|0|0|0|0|0|1|0|0|0|0|0|0|0|0|0|0|0|0|2|0|0|0|0|1|0|0|0|0|0|0|0|0|0|0|0	0.42	0.99	0.42	0.99	0.42	-3.34	15	0.31
TLK2-529	A0MZ66	SHTN1	2|4|5|3|3|3	20	3.33	6	3|3|2|11|12|10|0|1|0|3|3|8|0|0|0|7|6|11|1|2|0|8|10|8|7|0|0|1|6|7|7|5|4|14|10|8|17|14|11|5|8|8|9|12|12	0	0	0	0	0	-22.19	0.55	0.89
TLK2-529	A1L0T0	ILVBL	1|0|0|0|0|0	1	0.17	6	0|0|0|0|0|0|0|0|0|0|0|0|0|0|0|0|0|0|1|0|2|0|1|1|0|0|0|0|0|0|0|0|0|0|0|0|0|0|0|0|0|0|0|1|0	0	0	0	0	0	-3.46	1.25	0.89
TLK2-529	A1L390	PLEKHG3	1|0|0|0|0|0	1	0.17	6	0|0|0|0|0|0|0|0|0|0|2|0|0|0|0|1|1|1|0|0|1|0|0|0|0|0|0|0|1|0|1|0|0|0|0|1|0|1|0|0|0|0|0|0|0	0	0	0	0	0	-3.76	0.75	0.89
TLK2-529	A1X283	SH3PXD2B	4|4|3|4|2|2	19	3.17	6	1|1|1|10|11|8|0|0|1|6|11|12|1|1|1|20|18|19|0|0|0|7|6|6|18|0|0|0|16|13|12|8|10|5|6|7|5|6|5|8|9|10|8|9|9	0	0	0	0	0	-24.97	0.47	0.89
TLK2-529	A3KN83	SBNO1	37|35|34|30|36|35	207	34.5	6	0|0|0|6|5|5|0|0|1|10|15|16|0|0|0|20|18|17|0|0|0|3|6|3|10|1|0|0|11|9|8|8|9|12|8|4|7|6|5|8|6|8|4|5|4	0.9	0.93	0.9	0.93	0.9	1.47	6.02	0.03
TLK2-529	A4D1P6	WDR91	1|0|0|0|0|0	1	0.17	6	0|0|0|0|0|0|0|0|0|0|0|0|0|0|0|0|0|0|0|0|0|0|0|0|0|0|0|0|0|0|0|0|0|0|0|0|0|1|0|0|0|0|0|0|0	0	0	0	0	0	-3.34	1.67	0.89
TLK2-529	A5D8V6	VPS37C	1|0|0|0|1|0	2	0.33	6	0|0|0|1|1|0|0|0|0|0|3|3|0|0|0|3|4|2|0|0|0|2|3|2|4|0|0|0|2|4|3|4|3|1|0|0|0|1|0|2|1|1|0|0|0	0	0	0	0	0	-6.71	0.3	0.89
TLK2-529	A6NDG6	PGP	1|1|0|0|0|0	2	0.33	6	0|0|0|1|1|1|0|0|0|1|4|4|0|0|0|1|1|0|2|2|1|2|1|1|5|0|0|0|3|5|4|3|5|0|0|0|0|0|0|2|2|1|2|0|0	0	0	0	0	0	-7.18	0.27	0.89
TLK2-529	A6NDU8	C5orf51	1|2|1|1|1|1	7	1.17	6	0|0|0|0|0|0|0|0|0|1|1|2|0|0|0|2|1|1|1|1|1|1|1|1|1|0|0|0|1|1|2|1|1|0|0|0|1|1|1|1|1|1|1|1|1	0.01	0.08	0.01	0.08	0.01	-3.77	1.75	0.78
TLK2-529	A6NFI3	ZNF316	1|0|0|1|1|1	4	0.67	6	0|0|0|0|0|0|0|0|0|0|0|0|0|0|0|0|0|0|0|0|0|0|0|0|0|0|0|0|0|0|0|0|0|1|0|0|1|0|0|0|0|0|0|0|0	0	0	0	0	0	-3.34	6.67	0.89
TLK2-529	A6NHQ2	FBLL1	1|0|0|0|0|0	1	0.17	6	0|0|0|0|0|0|1|1|1|1|0|0|0|0|0|0|0|0|1|1|1|0|0|0|0|0|0|1|0|0|0|0|0|0|0|0|0|1|0|0|0|0|0|0|0	0	0	0	0	0	-3.7	0.83	0.89
TLK2-529	A6NHR9	SMCHD1	8|8|8|8|6|9	47	7.83	6	2|0|1|4|3|6|8|16|13|22|35|36|15|15|10|20|16|18|18|22|25|18|20|18|32|17|27|22|29|37|26|30|29|4|2|0|4|1|3|17|22|18|0|0|1	0	0	0	0	0	-49.65	0.52	0.89
TLK2-529	A6NKD9	CCDC85C	1|1|2|0|0|0	4	0.67	6	0|1|1|9|8|8|0|0|0|6|10|9|1|2|2|9|9|9|0|0|1|11|9|8|10|0|2|1|10|8|9|9|10|3|3|5|2|2|2|4|6|8|2|2|3	0	0	0	0	0	-22.23	0.14	0.89
TLK2-529	A8CG34	POM121C	1|2|2|2|2|2	11	1.83	6	0|0|0|0|2|1|0|0|0|2|2|2|1|0|0|3|4|7|1|5|5|1|0|1|6|0|0|0|2|4|2|4|3|5|1|0|1|1|1|2|0|0|0|0|0	0.01	0.01	0.01	0.01	0.01	-6.7	1.2	0.81
TLK2-529	BioID	BioID	1909|2260|2302|1905|2361|2467	13204	2200.67	6	306|634|581|2637|3073|2689|3|5|6|2|0|0|1|1|1|0|0|0|0|0|0|0|0|0|0|1|0|0|0|0|0|0|0|1891|2205|2024|1777|2326|2213|0|0|0|1575|1974|1931	0	0	0	0	0	-219.2	3.56	0.89
TLK2-529	BioID2	BioID2	1|1|1|1|1|1	6	1	6	0|0|0|0|0|0|87|89|89|806|1437|1398|69|62|58|851|866|853|140|145|147|1073|1046|1002|1733|83|68|70|1354|1730|1299|1442|1400|0|0|0|0|0|0|1226|1365|1414|0|0|0	0	0	0	0	0	#NAME?	0	0.89
TLK2-529	E9PAV3	NACA	8|7|8|6|7|7	43	7.17	6	5|5|4|28|30|28|30|26|28|131|143|122|18|13|11|97|84|87|8|9|7|34|40|34|57|14|8|6|70|64|58|55|54|16|16|16|25|28|27|212|177|169|17|14|13	0	0	0	0	0	-186.92	0.15	0.89
TLK2-529	O00116	AGPS	1|0|0|0|0|0	1	0.17	6	0|0|0|1|0|1|0|0|0|0|0|1|1|1|0|0|1|1|6|4|5|0|0|1|1|0|0|0|0|0|0|0|0|0|0|0|0|0|0|1|0|2|0|1|1	0	0	0	0	0	-5.48	0.26	0.89
TLK2-529	O00139	KIF2A	8|5|11|6|7|7	44	7.33	6	1|1|0|10|10|11|0|0|0|5|8|10|0|0|1|1|2|3|5|4|7|5|4|2|8|0|0|1|7|8|6|7|7|10|5|9|6|5|5|4|5|6|5|7|5	0	0.01	0	0.01	0	-11.41	1.6	0.83
TLK2-529	O00148	DDX39A	4|3|3|2|2|2	16	2.67	6	0|0|0|1|4|3|0|0|0|0|1|2|3|4|2|5|4|4|4|3|3|3|2|3|3|2|3|1|4|3|4|5|3|3|0|0|2|2|2|1|1|1|2|3|3	0	0.01	0	0.01	0	-7.84	1.21	0.84
TLK2-529	O00151	PDLIM1	15|12|14|16|13|18	88	14.67	6	2|3|1|39|53|46|1|2|3|52|52|52|4|6|5|46|49|49|1|1|2|31|30|28|33|1|3|2|36|38|31|30|26|27|37|35|33|36|33|34|34|37|22|22|23	0	0	0	0	0	-76.61	0.58	0.89
TLK2-529	O00154	ACOT7	1|1|1|0|0|0	3	0.5	6	0|0|0|6|5|6|0|0|0|1|3|1|0|0|0|0|0|0|4|6|5|3|1|2|2|0|0|0|1|2|1|2|3|0|0|0|0|0|0|4|2|4|1|0|1	0	0	0	0	0	-8.21	0.34	0.89
TLK2-529	O00170	AIP	1|1|0|2|1|1	6	1	6	0|0|0|2|1|2|0|0|0|4|5|6|0|1|1|9|10|10|3|5|5|7|7|5|10|0|0|0|11|10|7|8|9|2|1|1|3|3|3|6|7|6|5|4|4	0	0	0	0	0	-19.11	0.25	0.89
TLK2-529	O00178	GTPBP1	3|2|1|1|2|1	10	1.67	6	0|0|0|2|3|3|0|0|0|3|7|8|0|0|0|7|7|7|2|4|2|6|5|6|8|0|0|0|13|13|8|8|9|5|4|5|3|3|1|4|2|2|2|2|1	0	0	0	0	0	-14.75	0.45	0.89
TLK2-529	O00193	SMAP	13|15|13|33|22|24	120	20	6	7|8|7|43|44|40|1|1|1|21|19|21|3|5|3|20|23|19|2|2|2|12|12|11|9|0|1|2|10|10|8|8|6|16|24|32|36|39|39|24|20|20|27|24|23	0	0	0	0	0	-38.36	1.28	0.88
TLK2-529	O00213	APBB1	9|6|5|3|6|4	33	5.5	6	0|0|1|7|6|5|0|1|0|5|10|8|0|1|1|8|10|7|0|0|0|2|6|4|6|2|0|2|10|7|7|8|7|2|1|2|1|4|3|5|5|7|1|2|2	0	0.02	0	0.02	0	-11.25	1.49	0.82
TLK2-529	O00231	PSMD11	6|9|9|3|4|3	34	5.67	6	2|0|0|3|5|3|0|0|1|5|6|7|0|0|0|1|1|1|5|6|6|5|5|3|4|0|0|0|2|4|8|7|6|5|5|6|4|3|2|7|8|7|9|12|9	0	0.01	0	0.01	0	-11.88	1.47	0.82
TLK2-529	O00232	PSMD12	2|7|4|4|5|4	26	4.33	6	0|0|0|11|11|10|0|0|0|3|8|6|0|1|0|6|5|5|4|5|5|5|5|5|6|0|0|0|6|7|7|7|7|6|4|6|1|4|3|7|10|10|4|8|7	0	0	0	0	0	-16.26	0.95	0.87
TLK2-529	O00257	CBX4	1|1|1|4|5|4	16	2.67	6	0|0|0|1|0|1|0|0|0|1|0|2|0|0|0|1|0|0|0|3|2|0|0|1|1|0|0|0|0|0|2|1|1|0|1|0|1|1|1|0|1|0|0|0|0	0.44	0.97	0.44	0.97	0.44	-3.23	5.45	0.29
TLK2-529	O00264	PGRMC1	5|3|3|5|6|6	28	4.67	6	0|0|0|5|8|8|2|2|2|3|6|3|6|6|6|4|4|3|11|10|11|7|5|5|4|3|3|3|4|5|6|5|4|5|3|2|3|3|2|4|3|5|3|2|4	0	0	0	0	0	-13.63	1.09	0.87
TLK2-529	O00267	SUPT5H	14|17|12|21|21|23	108	18	6	0|0|0|7|8|5|0|0|0|4|7|8|0|0|0|7|5|8|4|5|6|6|5|4|10|0|0|0|7|7|6|6|9|4|2|2|2|1|2|5|4|5|2|5|4	0.72	0.98	0.72	0.98	0.72	-1.62	4.71	0.11
TLK2-529	O00268	TAF4	3|1|3|2|0|1	10	1.67	6	0|0|0|0|0|0|0|0|0|0|0|0|0|0|0|0|0|0|1|0|1|0|0|0|1|0|0|0|1|1|0|0|0|1|2|2|0|1|1|0|0|0|0|0|0	0.32	0.8	0.32	0.8	0.32	-3.93	6.25	0.39
TLK2-529	O00273	DFFA	6|6|4|4|6|2	28	4.67	6	0|0|0|6|7|8|0|0|0|3|8|9|0|0|0|4|4|5|0|0|0|6|6|4|11|0|0|0|8|11|3|7|6|6|4|2|3|4|4|6|6|7|6|8|9	0	0	0	0	0	-14	1.16	0.86
TLK2-529	O00299	CLIC1	8|3|6|3|3|2	25	4.17	6	0|0|0|17|13|15|0|0|0|1|1|1|0|0|0|1|2|3|5|5|6|1|2|1|2|0|0|0|3|3|1|1|0|12|12|13|10|8|9|1|4|2|6|6|7	0	0.01	0	0.01	0	-13.29	1.08	0.84
TLK2-529	O00303	EIF3F	5|5|6|3|3|3	25	4.17	6	2|3|2|6|5|4|2|3|3|5|6|6|0|0|1|1|0|0|4|4|5|4|3|5|3|4|5|3|5|5|6|5|5|5|5|4|4|3|4|4|3|3|5|5|3	0	0	0	0	0	-11.33	1.15	0.86
TLK2-529	O00401	WASL	1|1|2|2|1|1	8	1.33	6	0|0|0|2|5|4|0|0|0|2|6|6|0|0|0|2|4|3|0|0|0|5|3|4|9|0|0|0|10|9|5|7|10|0|1|0|2|3|2|2|3|3|2|0|0	0	0	0	0	0	-10.2	0.53	0.89
TLK2-529	O00410	IPO5	2|2|2|0|1|0	7	1.17	6	1|0|0|0|0|0|0|0|0|1|2|2|1|0|0|1|1|1|13|18|14|2|2|4|2|0|0|0|4|3|2|3|2|2|0|0|1|2|0|3|2|2|2|1|3	0	0	0	0	0	-10.49	0.54	0.89
TLK2-529	O00422	SAP18	1|1|1|3|1|1	8	1.33	6	0|0|0|1|0|0|0|0|0|0|0|0|0|0|0|0|0|0|1|1|0|0|0|0|2|1|0|0|2|1|0|0|0|0|0|0|0|0|0|0|0|0|0|0|0	0.13	0.78	0.13	0.78	0.13	-2.07	6.67	0.59
TLK2-529	O00425	IGF2BP3	6|11|9|3|2|2	33	5.5	6	0|1|0|5|6|7|2|5|1|4|5|5|0|0|0|2|2|0|9|9|10|3|4|4|8|4|4|4|8|9|7|9|8|9|8|7|5|3|6|9|9|11|2|0|1	0	0.01	0	0.01	0	-17.2	1.15	0.84
TLK2-529	O00429	DNM1L	4|5|3|5|4|3	24	4	6	2|3|1|17|21|18|0|0|1|29|44|50|2|1|1|38|32|37|5|7|6|21|20|19|35|4|1|1|34|32|28|31|27|28|22|15|18|19|15|30|34|30|26|28|23	0	0	0	0	0	-73.76	0.21	0.89
TLK2-529	O00443	PIK3C2A	1|0|0|0|0|0	1	0.17	6	0|1|0|5|11|6|0|0|1|15|17|20|1|2|3|23|21|19|5|3|3|9|8|10|14|1|3|2|19|17|15|15|13|6|5|5|3|3|4|9|6|8|7|3|7	0	0	0	0	0	-35.06	0.02	0.89
TLK2-529	O00458	IFRD1	1|0|0|0|0|0	1	0.17	6	0|0|0|2|0|1|0|0|0|0|0|0|0|0|0|0|0|0|0|1|0|2|1|2|0|0|0|0|0|0|0|0|0|0|0|0|0|0|0|0|0|0|0|0|0	0	0	0	0	0	-3.72	0.83	0.89
TLK2-529	O00487	PSMD14	5|4|5|3|2|3	22	3.67	6	0|0|0|1|1|0|0|0|0|0|5|4|0|0|0|1|2|1|2|3|3|4|5|4|3|0|0|0|3|4|4|4|5|1|1|2|1|2|0|5|5|4|3|5|3	0.02	0.05	0.02	0.05	0.02	-6.95	1.81	0.77
TLK2-529	O00505	KPNA3	7|11|13|8|5|7	51	8.5	6	0|0|0|5|5|5|0|1|0|5|5|6|0|0|0|4|5|4|3|4|3|6|4|5|6|0|1|0|6|6|3|4|4|4|2|2|3|3|3|2|4|3|2|3|1	0.29	0.93	0.29	0.93	0.29	-5.99	2.9	0.42
TLK2-529	O00512	BCL9	2|7|5|7|7|5	33	5.5	6	0|0|0|3|2|3|0|0|0|1|3|3|0|0|0|5|6|6|0|0|0|2|3|4|4|0|1|0|1|4|2|5|4|3|2|2|2|1|1|3|2|2|0|0|0	0.2	0.35	0.2	0.35	0.2	-6.04	3.09	0.51
TLK2-529	O00541	PES1	5|7|11|11|10|10	54	9	6	0|0|0|6|4|4|1|2|2|0|2|3|0|0|0|1|2|2|4|5|4|1|1|1|1|0|0|0|0|1|1|0|1|5|4|2|3|4|5|1|1|2|4|3|4	0.64	0.91	0.64	0.91	0.64	-2.77	4.66	0.16
TLK2-529	O00560	SDCBP	9|8|7|4|5|3	36	6	6	1|1|1|20|22|23|0|0|0|3|5|7|0|0|0|4|4|5|0|0|0|4|4|4|7|0|0|0|10|6|5|7|5|8|12|9|12|13|12|5|4|5|9|9|10	0	0	0	0	0	-18.35	1.05	0.87
TLK2-529	O00567	NOP56	3|2|1|3|0|3	12	2	6	0|0|0|3|1|3|2|3|1|1|1|1|0|0|0|0|0|1|14|15|16|6|6|5|3|0|0|0|3|3|1|1|2|6|1|3|1|1|1|2|1|0|2|2|2	0	0	0	0	0	-12.33	0.79	0.85
TLK2-529	O00571	DDX3X	28|23|22|11|12|10	106	17.67	6	6|7|8|61|66|68|11|29|20|83|113|117|12|14|9|63|62|60|46|48|52|84|71|81|75|10|12|9|88|78|68|59|64|45|40|38|20|36|29|45|44|46|16|28|24	0	0	0	0	0	-167.97	0.38	0.89
TLK2-529	O00629	KPNA4	5|4|7|4|5|4	29	4.83	6	0|0|0|2|3|3|0|0|0|7|9|8|0|0|0|3|3|4|6|5|3|6|6|6|11|1|1|1|10|12|4|4|5|5|2|1|5|4|2|4|5|4|1|1|1	0	0.01	0	0.01	0	-9.03	1.38	0.84
TLK2-529	O00716	E2F3	2|2|3|3|2|2	14	2.33	6	0|0|0|0|0|0|0|0|0|1|0|1|0|0|0|2|2|1|0|0|0|1|0|1|2|0|0|0|3|1|0|1|0|0|0|0|0|0|0|2|1|4|0|0|0	0.2	0.32	0.2	0.32	0.2	-1.79	4.57	0.51
TLK2-529	O00743	PPP6C	3|3|4|2|2|2	16	2.67	6	0|1|0|6|8|7|0|2|3|7|5|7|0|0|0|1|1|1|2|2|2|5|4|4|6|1|2|2|6|8|5|5|3|5|2|4|3|7|4|5|5|5|5|5|6	0	0	0	0	0	-12.75	0.74	0.87
TLK2-529	O00763	ACACB	15|12|11|22|21|18	99	16.5	6	131|146|112|1|1|1|118|178|161|1|5|4|219|199|184|4|6|5|88|91|85|1|0|1|2|180|138|127|1|1|3|2|2|0|0|0|0|0|0|0|0|0|0|0|0	0	0	0	0	0	-176.84	0.34	0.89
TLK2-529	O14497	ARID1A	3|3|4|10|8|12	40	6.67	6	0|0|0|1|3|1|0|0|0|1|6|6|0|0|0|6|6|6|2|1|2|9|8|9|9|2|1|1|8|6|9|8|10|3|1|0|3|3|1|4|1|3|3|1|0	0.08	0.32	0.08	0.32	0.08	-9.36	2.08	0.67
TLK2-529	O14530	TXNDC9	5|4|6|5|5|5	30	5	6	0|0|0|16|16|15|0|0|0|0|2|2|0|0|0|0|0|1|0|1|0|3|2|4|3|0|0|0|3|3|4|1|3|3|4|4|5|5|6|0|1|1|7|9|10	0	0.01	0	0.01	0	-6.75	1.68	0.82
TLK2-529	O14562	UBFD1	2|2|2|4|2|2	14	2.33	6	1|1|0|11|14|11|0|0|0|5|4|7|0|0|0|6|7|4|0|0|0|8|10|7|7|0|0|0|5|5|4|5|5|5|4|3|6|5|7|12|6|6|5|6|5	0	0	0	0	0	-15.43	0.53	0.89
TLK2-529	O14579	COPE	3|4|3|2|2|2	16	2.67	6	0|0|0|1|2|2|0|0|0|3|5|7|0|0|0|2|2|2|6|4|7|6|6|7|4|0|0|0|6|5|4|5|6|3|0|0|0|1|1|2|2|1|1|0|0	0	0.01	0	0.01	0	-7.74	1.17	0.83
TLK2-529	O14593	RFXANK	1|1|0|2|4|1	9	1.5	6	0|0|0|0|0|0|0|0|0|0|0|2|0|0|0|0|0|0|0|0|0|0|0|0|0|0|0|0|0|0|1|0|0|0|0|0|0|0|0|0|0|0|0|0|0	0.3	1	0.3	1	0.3	-3.33	15	0.41
TLK2-529	O14617	AP3D1	1|2|3|2|1|2	11	1.83	6	0|2|2|8|13|9|0|2|1|14|18|19|4|3|2|10|11|11|9|10|7|14|13|11|15|4|4|4|17|16|14|10|11|11|10|8|6|5|6|9|6|10|3|8|8	0	0	0	0	0	-34.75	0.22	0.89
TLK2-529	O14640	DVL1	5|4|3|5|8|8	33	5.5	6	1|0|0|0|0|0|16|31|23|1|0|1|55|47|50|3|4|6|12|11|9|0|0|0|1|56|41|44|0|0|2|2|0|4|1|0|2|1|1|2|1|0|0|0|0	0	0	0	0	0	-32.9	0.58	0.89
TLK2-529	O14641	DVL2	12|9|9|12|15|13	70	11.67	6	6|7|6|1|2|2|64|84|75|9|12|10|102|97|103|29|28|28|22|19|23|0|1|2|13|76|60|54|9|13|10|11|9|6|5|3|6|4|3|7|8|8|5|3|5	0	0	0	0	0	-75.41	0.5	0.89
TLK2-529	O14654	IRS4	13|15|14|17|17|14	90	15	6	3|2|2|16|17|14|1|4|2|11|20|25|18|16|16|43|48|43|6|11|10|23|13|13|26|6|6|6|26|28|21|24|21|16|12|12|14|9|12|25|21|23|17|16|18	0	0	0	0	0	-41.08	0.92	0.89
TLK2-529	O14735	CDIPT	2|0|0|2|1|0	5	0.83	6	0|0|0|0|0|0|0|0|0|0|0|0|0|0|0|0|0|0|1|1|2|0|0|0|0|1|1|0|0|0|0|0|0|1|1|0|0|0|0|1|1|1|0|0|0	0.12	0.36	0.12	0.36	0.12	-3.86	3.41	0.62
TLK2-529	O14737	PDCD5	5|4|3|1|2|3	18	3	6	0|0|0|6|7|9|0|0|0|6|6|6|0|0|0|5|5|5|1|1|2|6|5|5|5|0|0|0|7|5|3|5|5|6|10|9|5|5|5|5|5|5|6|5|4	0	0	0	0	0	-15.87	0.77	0.87
TLK2-529	O14744	PRMT5	8|8|7|7|6|6	42	7	6	0|1|0|8|5|8|0|0|0|8|14|16|0|0|0|3|4|4|5|5|7|7|8|7|15|2|2|1|16|15|10|10|13|7|7|4|4|6|4|10|9|10|2|2|1	0	0	0	0	0	-13.95	1.21	0.88
TLK2-529	O14776	TCERG1	23|24|22|15|18|18	120	20	6	3|1|1|29|22|23|0|1|1|13|21|19|1|1|2|19|21|19|3|4|4|15|15|16|25|1|7|7|17|21|18|25|21|16|18|15|4|8|10|9|14|16|11|16|18	0	0	0	0	0	-23.65	1.63	0.88
TLK2-529	O14818	PSMA7	1|1|1|2|1|2	8	1.33	6	0|0|0|2|5|2|0|0|0|2|2|2|0|0|0|0|0|0|1|0|1|2|1|1|0|0|0|0|1|1|0|1|0|3|2|3|0|0|0|2|3|3|2|2|1	0.01	0.03	0.01	0.03	0.01	-4.89	1.33	0.79
TLK2-529	O14828	SCAMP3	1|2|3|1|2|2	11	1.83	6	1|0|3|7|7|7|0|1|0|1|1|3|5|4|4|2|2|2|0|4|4|5|3|4|4|1|4|2|3|4|2|2|2|5|4|5|2|3|2|0|2|2|3|5|3	0	0	0	0	0	-12.01	0.63	0.87
TLK2-529	O14908	GIPC1	2|1|1|0|2|0	6	1	6	0|0|0|7|9|8|0|0|0|0|1|2|0|0|0|2|1|2|1|0|1|1|0|0|1|0|0|0|1|2|1|2|1|4|3|6|5|6|6|0|0|0|2|3|3	0	0	0	0	0	-9.64	0.56	0.85
TLK2-529	O14929	HAT1	8|8|9|8|7|9	49	8.17	6	1|0|0|7|5|6|1|1|1|4|13|14|1|1|1|8|8|9|2|2|2|8|7|6|12|1|1|1|10|11|8|8|8|4|6|4|2|1|1|7|6|9|5|2|5	0	0	0	0	0	-9.64	1.67	0.86
TLK2-529	O14950	MYL12B	4|4|4|2|4|4	22	3.67	6	0|0|0|6|4|5|5|5|6|18|12|10|0|0|0|2|3|2|8|10|10|4|4|5|11|8|4|6|13|12|8|7|9|10|12|11|11|11|11|12|11|13|8|6|9	0	0	0	0	0	-26.73	0.51	0.89
TLK2-529	O14965	AURKA	1|2|2|0|0|0	5	0.83	6	0|0|0|0|0|0|0|0|0|3|4|3|0|0|1|1|2|1|0|0|0|0|0|1|4|2|1|1|1|3|2|3|2|2|0|0|0|0|0|0|0|0|0|1|0	0.02	0.06	0.02	0.06	0.02	-6.14	0.99	0.77
TLK2-529	O14979	HNRNPDL	5|4|4|4|4|4	25	4.17	6	2|2|2|6|3|5|1|1|0|8|10|12|1|0|0|3|2|2|10|12|11|4|4|3|7|1|0|0|5|5|6|8|5|3|5|6|7|6|6|6|4|7|0|0|1	0	0	0	0	0	-11.76	0.98	0.88
TLK2-529	O14980	XPO1	3|4|3|3|1|2	16	2.67	6	0|0|0|0|0|0|0|0|0|0|8|6|0|0|0|1|1|0|26|28|28|7|6|5|6|0|1|0|10|8|10|9|10|2|2|0|1|2|1|4|4|5|3|4|3	0	0	0	0	0	-17.43	0.6	0.89
TLK2-529	O14981	BTAF1	4|4|4|1|4|2	19	3.17	6	0|0|2|2|2|2|0|0|0|2|2|3|0|0|0|6|4|4|2|1|1|1|1|1|4|0|0|0|5|4|3|2|3|2|4|2|0|2|2|0|3|2|0|0|1	0.03	0.04	0.03	0.04	0.03	-7.33	1.9	0.75
TLK2-529	O15014	ZNF609	3|3|4|3|1|3	17	2.83	6	1|0|0|1|0|0|0|0|0|0|0|0|0|0|0|2|1|1|0|0|0|2|3|2|0|2|2|2|2|0|1|0|0|2|1|0|0|2|1|0|0|0|0|0|0	0.26	0.55	0.26	0.55	0.26	-3.6	4.55	0.44
TLK2-529	O15020	SPTBN2	1|0|0|0|0|0	1	0.17	6	0|0|0|0|0|0|0|0|0|0|0|0|0|0|0|0|0|0|0|0|0|0|0|0|0|0|0|0|0|0|0|0|0|0|1|0|0|1|0|0|0|0|0|0|0	0	0	0	0	0	-3.34	1.67	0.89
TLK2-529	O15042	U2SURP	44|40|36|48|57|56	281	46.83	6	5|4|5|26|30|23|4|7|8|27|45|39|12|9|7|33|33|34|6|7|10|34|35|33|38|13|13|10|45|34|49|41|43|21|10|10|14|12|6|30|21|16|18|17|17	0	0	0	0	0	-27.75	2.21	0.88
TLK2-529	O15047	SETD1A	2|4|2|0|0|0	8	1.33	6	1|1|1|0|0|0|0|0|0|1|0|0|0|0|1|1|2|2|1|0|0|0|0|0|1|0|0|1|1|1|2|1|2|1|0|1|0|0|0|0|1|1|0|1|1	0.14	0.63	0.14	0.63	0.14	-5.06	2.31	0.57
TLK2-529	O15160	POLR1C	1|0|2|1|2|2	8	1.33	6	0|0|0|1|4|1|0|0|0|6|10|8|0|0|0|6|4|4|3|3|3|3|5|3|4|1|0|0|4|2|4|5|4|1|2|2|3|2|1|2|4|4|2|2|4	0	0	0	0	0	-13.06	0.51	0.89
TLK2-529	O15164	TRIM24	6|6|7|2|1|3	25	4.17	6	0|0|0|0|1|3|0|0|0|2|1|3|0|0|0|3|5|3|0|0|0|2|2|3|3|0|0|0|3|2|1|1|1|6|1|1|0|0|1|3|1|2|1|2|2	0.26	0.63	0.26	0.63	0.26	-5.99	3.18	0.45
TLK2-529	O15173	PGRMC2	2|1|1|2|2|1	9	1.5	6	1|3|2|10|11|14|0|0|0|1|1|1|2|2|1|2|1|1|1|2|2|1|0|0|0|0|0|0|1|0|0|0|0|9|7|5|7|8|10|0|0|0|4|4|5	0	0	0	0	0	-10.53	0.57	0.89
TLK2-529	O15212	PFDN6	1|2|0|1|1|2	7	1.17	6	0|0|0|7|7|6|0|0|0|9|9|11|0|0|0|4|3|2|0|0|1|6|5|5|9|1|2|3|10|9|8|10|6|2|5|4|5|5|6|9|8|7|3|2|3	0	0	0	0	0	-20.05	0.27	0.89
TLK2-529	O15226	NKRF	4|6|9|3|5|4	31	5.17	6	0|0|0|2|2|2|0|0|1|5|10|10|0|0|0|2|2|2|1|2|2|3|2|1|9|1|1|0|10|10|9|8|4|4|5|3|2|4|4|7|6|11|2|7|6	0	0.03	0	0.03	0	-10.86	1.44	0.82
TLK2-529	O15231	ZNF185	1|1|1|2|2|2	9	1.5	6	0|0|0|2|2|1|0|0|0|2|9|11|0|0|1|15|19|20|0|0|0|6|7|6|12|0|0|0|10|11|6|7|7|3|3|1|5|4|5|6|8|9|1|5|5	0	0	0	0	0	-18.51	0.32	0.89
TLK2-529	O15235	MRPS12	1|0|0|0|0|0	1	0.17	6	0|0|0|0|0|0|0|0|0|0|0|0|0|0|0|0|0|0|1|0|0|0|0|0|0|1|0|1|0|0|0|1|0|1|0|0|0|0|0|0|0|0|0|0|0	0	0	0	0	0	-3.38	1.5	0.89
TLK2-529	O15258	RER1	1|1|0|1|0|0	3	0.5	6	0|0|0|0|0|0|0|0|0|0|0|0|1|1|1|0|1|0|0|1|0|0|0|0|0|0|0|0|0|0|0|0|0|0|1|1|0|0|0|0|0|0|0|0|0	0	0	0	0	0	-3.54	3.21	0.89
TLK2-529	O15260	SURF4	3|2|2|1|3|3	14	2.33	6	0|0|0|1|3|1|0|0|0|1|5|5|3|2|1|3|4|3|3|2|4|3|2|3|4|1|1|0|4|4|5|4|4|1|0|0|3|3|2|2|2|2|2|2|3	0	0	0	0	0	-9.24	1.07	0.85
TLK2-529	O15269	SPTLC1	1|1|0|0|0|0	2	0.33	6	0|0|0|0|0|0|0|1|0|0|0|0|1|1|1|0|0|0|0|0|0|0|0|0|0|0|1|1|0|1|0|0|0|0|1|0|0|0|0|0|0|0|0|0|0	0	0	0	0	0	-3.62	1.87	0.89
TLK2-529	O15294	OGT	12|6|10|12|11|10	61	10.17	6	1|0|0|3|3|2|0|0|0|3|3|4|0|0|0|1|0|0|0|0|1|1|1|1|1|1|2|1|2|3|1|1|3|1|3|3|3|3|1|2|4|1|1|0|2	0.94	1	0.94	1	0.94	0.49	7.26	0.02
TLK2-529	O15318	POLR3G	1|0|0|0|0|0	1	0.17	6	0|0|0|0|0|0|0|0|0|0|0|0|0|0|0|0|0|0|0|0|0|0|0|0|2|0|0|0|0|0|0|0|0|0|0|0|0|0|0|0|0|0|0|0|0	0	0	0	0	0	-3.34	1.67	0.89
TLK2-529	O15347	HMGB3	2|3|3|3|2|3	16	2.67	6	0|0|0|8|6|6|0|0|0|1|1|4|0|1|0|6|6|5|1|2|2|5|5|4|4|0|0|0|5|5|5|6|5|2|2|3|3|3|4|4|4|4|3|1|2	0	0	0	0	0	-9.95	0.94	0.86
TLK2-529	O15355	PPM1G	22|16|20|11|17|14	100	16.67	6	1|1|1|23|26|19|0|1|0|18|22|22|1|4|2|32|29|31|5|7|7|19|15|17|24|2|3|3|22|21|17|18|16|17|11|7|14|14|14|17|16|16|9|12|9	0	0	0	0	0	-32	1.28	0.89
TLK2-529	O15371	EIF3D	11|11|6|4|6|8	46	7.67	6	3|4|5|10|14|14|2|2|2|11|12|10|2|2|2|15|18|15|8|15|10|11|8|7|14|2|2|2|15|16|9|10|8|11|9|6|11|7|7|10|13|13|9|11|11	0	0	0	0	0	-29.19	0.87	0.89
TLK2-529	O15372	EIF3H	1|1|0|0|0|0	2	0.33	6	0|0|0|4|3|2|1|1|1|7|13|10|1|0|0|3|3|3|3|1|1|5|3|2|8|0|0|1|9|8|7|6|7|5|3|5|2|2|2|7|8|9|6|7|4	0	0	0	0	0	-18.33	0.09	0.89
TLK2-529	O15446	CD3EAP	1|0|0|0|1|1	3	0.5	6	0|0|0|2|2|3|0|0|0|2|1|1|0|0|0|1|2|0|1|1|1|1|1|1|2|0|0|0|1|1|1|1|1|3|2|1|1|2|3|0|1|2|0|1|1	0	0	0	0	0	-6.5	0.51	0.89
TLK2-529	O15498	YKT6	2|3|2|3|2|2	14	2.33	6	0|0|0|13|14|13|0|0|1|3|4|4|2|0|0|4|3|4|1|1|1|6|6|5|7|0|0|0|8|7|5|5|7|7|6|4|3|5|5|4|3|3|9|11|11	0	0	0	0	0	-15.21	0.54	0.89
TLK2-529	O15514	POLR2D	1|2|0|2|1|1	7	1.17	6	0|0|0|0|0|0|0|0|0|0|1|3|0|0|0|0|0|0|0|0|0|0|0|0|1|0|0|0|1|1|3|1|1|0|0|0|0|0|0|0|0|0|0|0|0	0.11	0.32	0.11	0.32	0.11	-3.98	4.38	0.63
TLK2-529	O15525	MAFG	1|0|0|0|0|0	1	0.17	6	0|0|0|0|0|0|0|0|0|0|0|0|0|0|0|0|0|0|0|0|0|0|0|0|0|0|0|0|0|0|0|0|0|0|0|0|0|0|0|0|0|0|0|0|0	0	0	0	0	0	-3.34	1.67	0.89
TLK2-529	O15541	RNF113A	12|8|7|2|2|4	35	5.83	6	0|0|0|15|12|13|0|0|0|4|12|9|0|0|0|15|15|16|0|0|0|4|3|4|5|0|0|0|5|7|3|5|3|2|2|5|0|7|3|17|6|6|6|5|6	0	0.02	0	0.02	0	-16.82	1.22	0.83
TLK2-529	O15550	KDM6A	1|0|1|2|3|3	10	1.67	6	0|0|0|0|1|1|0|0|0|0|1|1|0|0|0|0|1|2|0|0|0|1|0|0|1|0|0|0|1|1|0|0|0|0|0|0|0|0|0|0|0|0|0|0|0	0.31	0.74	0.31	0.74	0.31	-3.86	6.82	0.4
TLK2-529	O43143	DHX15	44|48|43|38|39|40	252	42	6	13|10|7|53|49|52|6|12|12|62|85|85|6|5|6|47|47|48|22|24|21|54|55|59|66|16|14|12|64|60|49|52|47|30|28|39|25|37|29|46|48|64|29|31|31	0	0	0	0	0	-76.38	1.14	0.89
TLK2-529	O43148	RNMT	1|0|1|0|1|0	3	0.5	6	1|0|0|5|4|5|0|0|0|1|2|1|0|0|0|2|1|2|0|0|0|1|3|2|3|0|0|0|2|1|1|2|1|1|1|0|2|2|2|0|0|1|1|2|2	0	0	0	0	0	-7.22	0.42	0.89
TLK2-529	O43172	PRPF4	11|10|8|9|7|7	52	8.67	6	2|1|1|8|7|9|1|0|1|8|13|12|1|0|1|4|4|4|2|0|3|7|6|8|11|0|2|0|11|10|10|11|12|7|4|4|5|6|5|6|7|5|1|1|1	0	0	0	0	0	-9.76	1.76	0.84
TLK2-529	O43175	PHGDH	9|9|10|7|8|6	49	8.17	6	1|2|2|8|9|10|2|2|1|6|11|11|4|3|3|6|6|9|11|14|13|9|6|8|11|2|2|2|11|12|9|8|8|11|8|7|9|6|6|11|10|10|9|9|8	0	0	0	0	0	-19.57	1.13	0.88
TLK2-529	O43242	PSMD3	5|8|6|4|5|1	29	4.83	6	0|0|0|10|14|11|0|0|1|7|8|12|1|2|1|5|4|6|8|6|8|8|11|11|11|0|2|1|13|12|11|13|11|10|12|9|6|7|7|13|13|14|4|6|8	0	0	0	0	0	-28.86	0.69	0.88
TLK2-529	O43252	PAPSS1	2|4|3|4|4|3	20	3.33	6	0|0|0|3|2|4|0|0|0|0|1|2|0|0|0|2|3|2|1|1|1|0|1|1|0|0|0|0|2|0|1|1|0|3|2|1|1|0|0|0|0|0|3|3|3	0.17	0.25	0.17	0.25	0.17	-3.37	3.41	0.54
TLK2-529	O43290	SART1	29|33|33|24|32|29	180	30	6	2|4|1|15|19|20|0|0|1|24|34|29|3|5|4|20|17|19|11|10|11|10|14|17|26|6|3|1|26|26|27|25|27|16|21|21|12|15|17|27|22|28|6|4|4	0	0	0	0	0	-20.03	2.08	0.88
TLK2-529	O43353	RIPK2	3|4|3|5|4|4	23	3.83	6	0|0|0|2|4|3|0|0|0|5|5|6|0|0|0|9|8|7|0|0|0|8|5|6|8|0|0|0|9|11|9|9|10|7|1|5|4|6|4|3|3|1|4|2|4	0	0	0	0	0	-11.35	1.03	0.87
TLK2-529	O43390	HNRNPR	25|20|22|19|16|20	122	20.33	6	8|6|6|7|12|7|1|2|2|12|15|15|0|1|1|0|0|0|31|27|28|9|7|9|16|0|1|2|12|15|18|22|19|18|16|13|16|16|18|18|14|15|0|2|0	0	0	0	0	0	-15.52	2	0.87
TLK2-529	O43395	PRPF3	14|14|16|11|12|11	78	13	6	1|1|1|2|5|4|0|0|0|6|7|5|1|0|0|3|2|1|0|1|1|7|5|5|3|0|0|0|4|3|5|6|6|10|7|8|4|6|5|4|3|4|1|1|1	0.58	0.87	0.58	0.87	0.58	-0.73	4.21	0.19
TLK2-529	O43396	TXNL1	15|14|16|10|14|17	86	14.33	6	0|0|0|41|38|37|4|4|3|39|48|48|9|7|7|52|42|41|7|9|9|36|34|36|34|3|5|6|33|34|28|33|27|19|15|18|24|27|28|45|40|38|12|19|17	0	0	0	0	0	-74.34	0.61	0.89
TLK2-529	O43399	TPD52L2	2|3|1|3|6|6	21	3.5	6	1|2|1|15|19|17|1|5|5|30|34|29|5|3|4|17|15|16|1|2|3|21|19|21|16|1|0|1|15|15|15|17|13|9|7|9|8|9|10|22|24|25|8|9|11	0	0	0	0	0	-49.07	0.3	0.89
TLK2-529	O43432	EIF4G3	1|1|3|1|1|1	8	1.33	6	7|4|5|20|15|14|10|17|18|42|61|65|40|35|29|57|52|46|13|15|10|29|28|27|33|18|25|22|36|38|34|32|30|14|10|10|9|11|11|24|28|31|12|18|16	0	0	0	0	0	-106.86	0.05	0.89
TLK2-529	O43447	PPIH	7|6|5|2|2|2	24	4	6	1|2|2|5|8|6|0|1|0|2|6|6|1|1|1|1|3|2|3|3|4|2|1|3|4|0|1|0|5|5|3|6|6|3|3|3|1|2|2|0|3|3|0|1|1	0.02	0.08	0.02	0.08	0.02	-9.02	1.55	0.77
TLK2-529	O43474	KLF4	1|1|1|2|2|2	9	1.5	6	0|0|0|0|0|0|0|0|0|0|0|1|0|0|0|0|0|0|0|0|0|0|0|0|0|0|0|0|0|0|0|0|0|1|0|0|1|0|0|0|0|0|0|0|0	0.38	0.77	0.38	0.77	0.38	-0.83	15	0.34
TLK2-529	O43482	OIP5	1|1|2|2|0|1	7	1.17	6	0|0|0|2|2|0|0|0|0|0|0|0|0|0|0|0|0|0|0|0|0|0|0|0|1|0|0|0|0|0|0|0|0|1|1|0|0|0|1|0|0|0|0|0|0	0.17	0.52	0.17	0.52	0.17	-3.63	6.56	0.54
TLK2-529	O43488	AKR7A2	1|0|0|0|0|0	1	0.17	6	1|0|1|1|1|2|0|1|0|1|0|1|0|0|0|0|0|0|3|3|3|0|0|0|1|2|0|0|0|0|0|0|0|2|3|1|2|2|2|1|0|1|1|1|1	0	0	0	0	0	-5.99	0.2	0.89
TLK2-529	O43491	EPB41L2	4|6|5|9|6|7	37	6.17	6	8|12|12|51|53|53|1|3|1|30|49|48|8|9|11|54|54|57|4|7|7|37|28|32|39|2|2|5|38|36|35|34|30|30|31|30|22|31|32|23|34|33|26|39|36	0	0	0	0	0	-105.28	0.23	0.89
TLK2-529	O43583	DENR	1|1|1|0|0|0	3	0.5	6	0|0|0|9|8|8|0|0|0|2|3|5|1|2|1|4|3|5|3|2|2|5|4|5|7|1|1|1|4|5|4|5|5|2|3|4|4|5|4|3|4|7|3|3|2	0	0	0	0	0	-16.16	0.15	0.89
TLK2-529	O43592	XPOT	2|1|1|0|0|0	4	0.67	6	0|0|0|0|0|1|0|0|0|0|1|0|1|0|0|0|0|0|6|8|8|3|4|4|2|2|2|1|0|2|1|1|1|0|0|1|0|0|0|1|1|1|2|1|2	0	0.02	0	0.02	0	-7.21	0.53	0.83
TLK2-529	O43615	TIMM44	1|1|1|1|1|1	6	1	6	0|1|0|1|1|1|1|1|2|0|1|1|0|0|0|0|0|0|4|2|5|0|0|1|0|2|2|3|0|2|1|2|1|0|1|0|0|0|0|0|0|0|3|3|3	0	0	0	0	0	-4.86	1	0.89
TLK2-529	O43660	PLRG1	9|9|11|8|14|12	63	10.5	6	0|0|0|0|0|2|0|1|0|3|11|11|1|1|2|2|3|4|3|0|0|5|4|3|18|3|3|6|14|16|12|18|17|4|4|4|1|2|2|6|7|6|1|0|0	0.03	0.11	0.03	0.11	0.03	-6.72	2.36	0.75
TLK2-529	O43663	PRC1	1|1|1|1|1|1	6	1	6	1|0|0|0|0|0|0|0|0|2|1|1|0|0|0|0|0|0|1|1|1|1|0|1|1|0|0|0|1|0|1|0|0|1|1|1|0|0|0|0|0|0|0|1|0	0	0	0	0	0	-2.73	2.65	0.89
TLK2-529	O43670	ZNF207	5|4|4|4|5|3	25	4.17	6	0|0|0|4|3|3|1|0|0|3|4|4|0|1|0|4|6|6|0|0|0|3|2|3|4|0|0|0|4|5|3|3|4|3|4|2|4|3|3|3|4|6|4|4|3	0	0.01	0	0.01	0	-7.3	1.66	0.82
TLK2-529	O43684	BUB3	9|8|9|5|7|6	44	7.33	6	0|1|0|16|12|12|2|1|2|12|16|14|3|4|3|13|15|15|9|8|8|10|9|10|12|1|3|3|13|8|8|9|8|10|9|7|9|7|8|11|11|13|7|8|10	0	0	0	0	0	-24.74	0.89	0.89
TLK2-529	O43719	HTATSF1	26|20|27|26|24|24	147	24.5	6	0|1|4|11|16|17|0|0|0|5|9|9|1|1|1|16|17|14|6|4|5|8|8|9|10|0|0|0|10|6|11|10|11|14|11|9|8|10|10|6|6|6|9|9|8	0.3	0.54	0.3	0.54	0.3	-3.93	3.38	0.41
TLK2-529	O43768	ENSA	7|9|8|2|2|3	31	5.17	6	1|1|1|17|17|18|0|2|1|10|15|16|1|1|1|14|17|16|0|1|0|12|13|11|14|0|0|0|13|16|9|10|11|7|19|28|7|13|11|8|14|13|8|10|12	0	0	0	0	0	-34.49	0.57	0.89
TLK2-529	O43776	NARS1	5|2|4|5|3|3	22	3.67	6	0|0|1|24|22|22|0|0|0|28|25|30|1|2|2|20|22|25|14|13|16|22|17|22|28|0|2|0|27|31|21|18|21|8|6|9|9|6|9|24|22|27|13|15|16	0	0	0	0	0	-56.32	0.26	0.89
TLK2-529	O43795	MYO1B	1|2|0|0|1|0	4	0.67	6	0|0|0|2|1|4|0|0|0|0|0|1|0|0|0|0|0|0|2|2|1|1|1|1|1|0|0|0|2|1|1|1|1|7|2|3|6|5|3|0|0|0|1|1|0	0	0.03	0	0.03	0	-6.68	0.59	0.82
TLK2-529	O43805	SSNA1	1|0|1|0|1|0	3	0.5	6	0|0|0|0|1|0|0|0|0|1|0|0|0|0|0|0|0|0|0|0|0|0|0|0|0|0|0|0|0|1|0|0|1|1|0|0|1|0|0|1|1|1|1|2|1	0	0	0	0	0	-4.02	1.73	0.89
TLK2-529	O43809	NUDT21	19|27|23|22|25|27	143	23.83	6	7|4|5|14|13|18|2|1|2|10|19|14|7|4|4|16|12|15|5|6|6|16|18|17|16|3|3|2|15|13|15|16|13|12|9|17|15|17|15|14|15|13|12|14|17	0	0	0	0	0	-15.42	2.14	0.86
TLK2-529	O43819	SCO2	1|0|0|0|1|1	3	0.5	6	0|0|0|0|0|0|0|0|0|0|0|0|0|0|0|0|1|0|1|1|1|1|0|0|0|0|0|0|0|1|0|0|0|0|0|0|1|1|0|1|1|0|1|1|1	0	0	0	0	0	-4.02	1.73	0.89
TLK2-529	O43823	AKAP8	3|3|2|5|4|4	21	3.5	6	0|0|0|0|1|0|0|0|0|1|1|2|1|1|0|3|1|2|4|3|3|3|1|1|2|1|2|0|3|3|3|3|2|5|1|0|1|1|1|3|3|4|3|4|2	0.04	0.15	0.04	0.15	0.04	-5.9	2.1	0.72
TLK2-529	O43826	SLC37A4	1|2|1|0|0|1	5	0.83	6	0|0|0|0|0|0|1|1|1|0|0|0|1|1|1|0|0|1|0|0|0|0|0|0|0|0|1|1|0|0|0|0|0|0|0|3|1|1|2|0|1|1|0|0|0	0.03	0.18	0.03	0.18	0.03	-4.39	2.08	0.74
TLK2-529	O43829	ZBTB14	1|0|1|2|1|1	6	1	6	0|0|0|0|0|0|0|0|0|0|2|1|0|0|0|0|1|1|0|0|0|0|0|0|1|0|0|0|3|0|0|2|2|1|0|0|0|0|0|0|0|0|0|0|0	0.05	0.27	0.05	0.27	0.05	-4.13	3.21	0.72
TLK2-529	O43865	AHCYL1	2|1|0|0|0|0	3	0.5	6	0|0|0|3|1|1|0|0|0|0|3|1|0|0|0|1|2|4|0|0|0|1|1|2|5|0|0|0|4|5|2|1|5|2|4|4|2|2|2|1|3|2|4|5|3	0	0	0	0	0	-9.31	0.3	0.85
TLK2-529	O43913	ORC5	2|5|2|2|3|3	17	2.83	6	0|0|0|0|0|0|0|0|0|0|0|0|0|0|0|0|0|0|0|1|2|0|0|0|2|0|0|0|2|1|0|1|0|1|0|0|1|0|0|0|0|0|3|2|2	0.37	0.86	0.37	0.86	0.37	-1.52	7.08	0.36
TLK2-529	O60216	RAD21	6|9|7|5|8|6	41	6.83	6	2|3|2|4|4|2|0|0|0|0|1|0|1|0|0|3|2|2|7|7|10|4|4|3|3|0|2|3|2|4|3|3|3|4|3|3|2|3|2|1|3|1|0|1|2	0.14	0.42	0.14	0.42	0.14	-4.28	2.82	0.57
TLK2-529	O60231	DHX16	17|21|20|24|25|24	131	21.83	6	0|0|0|21|16|23|0|0|0|8|12|12|0|0|0|12|14|15|6|6|5|10|11|13|17|0|0|0|16|13|12|18|14|10|8|11|13|8|9|12|9|11|12|9|9	0.01	0.01	0.01	0.01	0.01	-10.49	2.49	0.81
TLK2-529	O60239	SH3BP5	1|0|0|0|0|0	1	0.17	6	0|0|0|0|0|0|0|0|0|0|0|0|0|0|0|0|0|0|0|0|0|0|0|0|0|0|0|0|0|0|0|0|0|0|1|1|0|0|0|0|0|0|0|1|0	0	0	0	0	0	-3.34	1.67	0.89
TLK2-529	O60264	SMARCA5	23|24|20|20|19|23	129	21.5	6	1|3|3|2|2|2|3|6|3|11|16|18|0|0|0|0|0|0|9|12|13|1|1|1|17|4|5|4|17|19|14|17|16|14|11|13|8|13|12|13|11|10|1|0|3	0.05	0.11	0.05	0.11	0.05	-5.04	2.94	0.71
TLK2-529	O60271	SPAG9	4|2|1|4|3|4	18	3	6	18|19|14|28|31|29|0|3|0|10|15|20|3|4|3|16|13|15|2|7|8|18|20|15|23|5|4|4|20|22|17|27|21|23|26|23|27|29|22|19|21|19|20|30|24	0	0	0	0	0	-69.37	0.18	0.89
TLK2-529	O60306	AQR	7|11|14|13|14|10	69	11.5	6	0|0|0|0|0|0|0|0|0|0|0|0|0|0|0|0|2|2|0|2|1|0|0|0|1|0|0|0|0|0|1|0|0|1|1|0|0|0|1|1|1|1|0|0|0	1	1	1	1	1	9.01	34.5	0
TLK2-529	O60315	ZEB2	1|1|1|2|2|2	9	1.5	6	0|0|0|0|0|0|0|0|0|0|1|0|0|0|0|0|1|1|0|0|0|0|0|0|1|0|0|0|2|0|1|0|0|1|1|0|0|0|0|0|1|0|0|0|0	0.23	0.46	0.23	0.46	0.23	-2.35	6.75	0.48
TLK2-529	O60341	KDM1A	10|13|11|12|15|15	76	12.67	6	1|2|2|2|3|3|2|4|2|4|9|10|0|0|0|0|0|0|3|3|5|6|4|2|9|8|10|10|10|10|8|7|8|3|2|1|7|7|3|5|7|9|7|11|9	0.06	0.14	0.06	0.14	0.06	-6.11	2.61	0.7
TLK2-529	O60347	TBC1D12	1|0|0|0|1|1	3	0.5	6	0|0|0|1|2|0|0|0|0|0|0|0|0|0|0|2|1|2|0|0|0|0|1|0|1|0|0|0|0|1|0|0|0|1|0|0|2|1|1|0|0|0|0|0|0	0	0	0	0	0	-4.25	1.41	0.89
TLK2-529	O60423	ATP8B3	5|0|1|3|5|8	22	3.67	6	0|0|0|4|3|3|0|0|0|0|0|0|0|0|0|0|0|0|0|0|0|0|0|0|0|0|0|0|0|0|0|0|0|2|17|7|2|5|5|0|0|0|11|11|5	0.12	0.4	0.12	0.4	0.12	-8.73	2.2	0.61
TLK2-529	O60443	GSDME	2|3|3|2|1|1	12	2	6	0|0|0|5|9|8|0|0|0|0|1|0|0|0|0|1|0|0|0|0|0|0|0|0|0|0|0|0|0|0|0|0|0|5|2|3|4|5|5|1|1|2|7|6|5	0.01	0.03	0.01	0.03	0.01	-6.59	1.29	0.79
TLK2-529	O60493	SNX3	1|0|0|0|0|0	1	0.17	6	0|0|0|3|3|3|0|0|0|3|4|4|0|0|0|4|4|4|1|1|1|7|2|5|6|0|0|0|5|4|6|6|6|2|2|0|2|1|2|3|5|5|2|3|2	0	0	0	0	0	-12.49	0.07	0.89
TLK2-529	O60502	OGA	6|4|5|8|7|10	40	6.67	6	0|0|0|4|3|5|0|0|0|3|10|12|0|1|1|14|12|14|0|0|0|9|8|10|12|0|0|0|10|11|10|11|10|1|6|5|5|5|3|5|6|4|7|6|5	0	0	0	0	0	-14.35	1.32	0.86
TLK2-529	O60506	SYNCRIP	13|16|16|9|9|11	74	12.33	6	1|2|0|7|5|8|2|3|2|17|21|25|2|1|1|4|7|4|22|22|21|12|12|13|18|1|2|3|17|16|16|16|16|17|13|10|11|13|10|14|17|14|2|2|2	0	0	0	0	0	-23.95	1.25	0.88
TLK2-529	O60508	CDC40	1|3|3|2|3|4	16	2.67	6	0|0|0|0|0|0|0|0|0|0|0|1|0|0|0|0|0|0|1|2|1|0|0|1|3|0|0|0|3|2|1|2|2|0|0|0|0|0|0|0|0|1|0|0|0	0.32	0.63	0.32	0.63	0.32	-2.78	6	0.4
TLK2-529	O60563	CCNT1	14|12|12|10|9|10	67	11.17	6	0|0|0|5|5|8|0|1|2|9|12|12|1|0|0|10|11|13|1|0|0|7|4|7|9|0|0|0|11|8|8|10|7|7|3|5|4|3|2|8|7|6|0|3|1	0.02	0.08	0.02	0.08	0.02	-6.55	2.39	0.76
TLK2-529	O60583	CCNT2	1|1|1|1|0|0	4	0.67	6	0|0|0|1|0|0|0|0|0|0|2|0|0|0|0|2|0|0|0|0|0|1|0|0|2|0|0|0|1|2|2|2|1|2|0|0|1|0|1|0|0|1|0|0|0	0	0	0	0	0	-4.66	1.43	0.89
TLK2-529	O60610	DIAPH1	1|1|1|0|0|0	3	0.5	6	0|1|0|3|2|2|0|2|1|4|13|15|1|1|1|13|12|12|6|5|4|4|6|2|12|3|6|7|19|14|15|12|14|9|8|4|3|3|4|11|11|14|7|11|12	0	0	0	0	0	-31.41	0.07	0.89
TLK2-529	O60664	PLIN3	7|10|7|7|10|9	50	8.33	6	2|2|2|19|20|20|0|0|0|5|6|10|0|0|1|15|11|16|0|0|1|8|7|7|15|1|0|2|12|10|9|7|9|9|5|6|7|5|6|8|8|7|10|13|9	0	0	0	0	0	-16.35	1.21	0.88
TLK2-529	O60684	KPNA6	3|2|3|3|2|4	17	2.83	6	0|0|0|1|2|2|0|0|0|1|2|3|0|0|0|4|2|2|2|3|3|0|1|0|3|0|0|0|4|3|2|2|3|2|2|1|1|3|1|2|2|3|0|0|0	0.04	0.11	0.04	0.11	0.04	-4.86	2.06	0.73
TLK2-529	O60701	UGDH	3|3|4|0|1|2	13	2.17	6	0|0|0|4|4|5|0|0|0|3|5|5|0|0|0|4|4|3|3|2|2|4|2|4|3|0|1|1|5|7|5|7|6|1|3|1|0|1|1|2|1|3|5|5|4	0	0	0	0	0	-13.01	0.84	0.85
TLK2-529	O60716	CTNND1	1|1|1|3|0|1	7	1.17	6	0|0|0|19|19|11|0|0|0|9|20|18|0|1|1|20|21|24|3|2|3|19|14|15|18|0|0|0|18|21|16|17|17|12|14|6|8|8|8|16|16|16|11|14|9	0	0	0	0	0	-46.42	0.11	0.89
TLK2-529	O60762	DPM1	1|1|1|0|0|0	3	0.5	6	0|0|0|0|0|0|0|0|0|0|0|0|0|0|0|0|0|0|1|3|1|0|1|1|0|0|0|0|0|0|0|1|0|0|0|0|1|0|0|0|0|0|0|0|0	0	0	0	0	0	-3.72	2.5	0.89
TLK2-529	O60763	USO1	2|1|1|0|0|0	4	0.67	6	4|3|2|7|6|9|0|0|0|0|1|4|0|0|0|1|2|2|6|6|6|3|3|1|6|0|1|1|7|4|4|5|5|8|7|8|8|8|7|5|4|3|8|10|7	0	0	0	0	0	-19.15	0.16	0.89
TLK2-529	O60828	PQBP1	3|2|4|6|7|4	26	4.33	6	0|0|0|3|2|2|0|0|0|4|5|6|0|0|0|5|6|5|0|0|0|5|4|3|6|0|0|0|7|7|5|6|6|5|3|1|3|3|2|3|6|4|2|3|3	0.01	0.04	0.01	0.04	0.01	-9.66	1.56	0.8
TLK2-529	O60832	DKC1	6|5|3|3|2|2	21	3.5	6	2|1|2|2|5|3|1|1|1|2|3|3|0|0|0|1|0|0|6|7|7|1|3|3|1|1|1|0|6|4|4|2|4|3|3|6|2|2|2|1|6|5|0|2|1	0.01	0.04	0.01	0.04	0.01	-8.51	1.43	0.8
TLK2-529	O60884	DNAJA2	5|6|6|3|2|2	24	4	6	1|1|1|4|5|3|2|2|2|3|8|8|0|0|0|3|4|2|6|5|7|8|7|7|7|5|2|1|7|7|10|9|8|3|1|1|0|0|0|4|5|7|2|3|3	0	0	0	0	0	-13.68	1.03	0.86
TLK2-529	O60885	BRD4	20|23|24|19|22|27	135	22.5	6	8|10|8|11|9|9|0|0|0|2|4|5|0|0|0|6|7|5|0|0|0|0|0|1|2|0|0|0|0|0|1|1|1|2|8|8|1|3|1|0|1|2|3|5|3	0.9	0.97	0.9	0.97	0.9	1.52	7.97	0.03
TLK2-529	O60934	NBN	3|1|1|2|1|2	10	1.67	6	2|3|2|2|2|0|0|0|0|0|1|2|0|0|0|0|0|0|3|1|3|1|1|2|1|1|0|1|0|1|1|3|2|1|0|0|0|0|1|0|0|0|1|0|0	0.04	0.16	0.04	0.16	0.04	-4.44	1.97	0.72
TLK2-529	O60942	RNGTT	8|6|5|6|4|3	32	5.33	6	0|0|0|4|6|4|0|0|0|1|4|4|0|0|0|1|2|2|0|0|1|0|1|0|2|0|0|0|2|2|2|1|1|0|2|1|0|0|0|2|0|1|1|3|2	0.37	0.78	0.37	0.78	0.37	-2.61	4.62	0.35
TLK2-529	O75030	MITF	1|0|0|1|1|3	6	1	6	0|0|0|0|0|0|0|0|0|0|0|0|0|0|0|0|0|0|0|0|0|0|0|0|1|0|0|0|0|0|0|0|0|0|0|0|0|0|0|0|0|0|0|0|0	0.16	0.95	0.16	0.95	0.16	-3.34	10	0.55
TLK2-529	O75113	N4BP1	15|12|15|12|11|15	80	13.33	6	1|1|1|7|9|12|0|0|0|4|10|6|0|1|0|13|15|14|0|1|0|9|7|7|12|0|0|0|8|11|7|8|7|9|8|12|6|6|4|3|1|5|6|7|9	0.01	0.03	0.01	0.03	0.01	-6.94	2.43	0.78
TLK2-529	O75131	CPNE3	2|1|1|0|0|0	4	0.67	6	0|0|0|6|8|8|0|0|0|0|1|1|0|0|0|0|2|3|0|1|1|2|3|3|7|0|0|0|10|9|6|4|5|4|3|3|2|3|3|1|3|1|5|5|5	0	0	0	0	0	-13.01	0.25	0.89
TLK2-529	O75150	RNF40	15|12|14|10|12|12	75	12.5	6	0|0|0|2|4|3|0|0|0|2|2|1|0|0|0|0|0|0|1|2|2|3|4|2|6|0|0|0|4|6|3|6|7|10|9|5|5|3|3|2|1|2|1|2|1	0.67	0.85	0.67	0.85	0.67	-0.23	5.41	0.14
TLK2-529	O75152	ZC3H11A	16|19|21|25|29|28	138	23	6	1|3|2|9|11|12|1|1|2|10|18|16|1|3|1|6|6|7|3|4|3|8|9|10|6|0|3|1|5|7|8|11|8|7|8|7|4|6|5|4|9|7|3|3|3	0.59	0.97	0.59	0.97	0.59	-3.38	3.95	0.18
TLK2-529	O75153	CLUH	1|0|0|1|1|1	4	0.67	6	0|0|0|3|4|2|0|0|0|3|5|7|0|0|0|6|4|5|1|3|2|9|8|10|12|0|0|0|10|10|3|5|8|4|2|2|5|6|5|4|3|2|3|3|2	0	0	0	0	0	-17.09	0.19	0.89
TLK2-529	O75179	ANKRD17	6|3|6|7|4|4	30	5	6	4|7|5|8|6|6|0|0|0|4|10|8|3|2|2|14|17|11|1|1|2|6|6|6|11|2|1|2|11|11|13|10|9|5|3|5|5|4|5|6|6|4|5|5|5	0	0	0	0	0	-18.8	0.88	0.88
TLK2-529	O75182	SIN3B	2|2|1|4|4|4	17	2.83	6	1|0|0|0|0|0|0|0|0|0|0|0|0|0|0|0|0|0|0|0|0|0|0|0|0|0|1|0|0|0|1|0|0|0|0|0|0|0|0|0|0|0|0|0|0	0.75	0.99	0.75	0.99	0.75	-0.83	28.33	0.09
TLK2-529	O75348	ATP6V1G1	2|0|0|0|0|0	2	0.33	6	0|0|0|1|1|1|0|0|0|1|2|4|0|0|0|0|0|0|1|0|0|0|1|0|1|0|0|0|0|1|0|1|0|1|0|0|1|1|1|1|1|1|1|1|1	0.02	0.11	0.02	0.11	0.02	-4.93	0.6	0.77
TLK2-529	O75367	MACROH2A1	10|12|12|7|9|8	58	9.67	6	1|1|1|2|1|1|2|5|3|11|9|9|0|0|0|0|0|0|17|16|17|0|0|0|7|2|2|1|5|9|9|8|7|8|6|10|4|4|7|5|4|4|1|3|5	0.01	0.02	0.01	0.02	0.01	-8.48	2.1	0.8
TLK2-529	O75369	FLNB	6|6|5|3|5|4	29	4.83	6	49|56|42|14|18|20|3|7|8|10|21|24|19|20|20|29|29|25|10|8|10|17|14|17|18|14|19|13|18|21|16|16|13|22|18|14|10|7|8|13|15|14|8|15|14	0	0	0	0	0	-68.32	0.27	0.89
TLK2-529	O75376	NCOR1	3|2|2|1|1|1	10	1.67	6	1|1|1|1|1|2|0|0|0|1|3|5|0|0|1|6|5|7|0|0|0|2|1|3|3|1|1|1|4|3|4|5|7|2|3|2|0|1|0|1|1|0|0|2|1	0	0.01	0	0.01	0	-7.93	0.9	0.83
TLK2-529	O75390	CS	4|3|2|0|1|1	11	1.83	6	0|0|0|1|0|0|0|0|0|0|0|0|1|1|1|0|0|0|2|2|2|0|0|0|0|0|0|0|0|0|0|0|0|3|2|1|2|1|1|0|0|0|1|0|1	0.2	0.7	0.2	0.7	0.2	-4.75	3.75	0.51
TLK2-529	O75391	SPAG7	8|6|7|7|6|7	41	6.83	6	0|1|0|7|11|7|0|0|0|9|13|9|1|0|0|16|12|11|0|0|1|3|11|7|12|0|0|0|11|15|12|11|12|6|6|5|7|6|10|7|7|6|6|6|7	0	0	0	0	0	-14.83	1.13	0.88
TLK2-529	O75398	DEAF1	3|2|0|0|0|1	6	1	6	0|0|0|0|0|0|0|0|0|0|0|0|0|0|0|0|0|0|0|0|0|0|0|0|0|0|0|0|0|0|0|0|0|0|0|0|0|0|0|0|0|0|0|0|0	0.29	0.95	0.29	0.95	0.29	-3.34	10	0.42
TLK2-529	O75400	PRPF40A	4|5|6|5|5|5	30	5	6	0|2|0|5|7|5|0|3|1|10|16|14|0|3|2|12|12|11|6|5|5|8|8|8|17|3|5|5|16|18|11|18|15|5|5|4|2|2|2|6|8|10|2|3|4	0	0	0	0	0	-20.78	0.74	0.89
TLK2-529	O75461	E2F6	3|4|1|3|2|1	14	2.33	6	0|0|0|2|1|1|0|0|0|0|0|0|0|0|0|0|1|0|0|0|0|0|0|0|1|0|0|0|0|0|0|1|0|0|0|0|0|1|0|0|0|0|0|0|0	0.57	0.99	0.57	0.99	0.57	-1.79	13.12	0.2
TLK2-529	O75475	PSIP1	1|1|4|2|3|1	12	2	6	0|0|0|0|1|1|0|0|0|1|3|2|0|0|0|3|2|1|2|3|1|0|0|1|3|0|0|0|4|4|4|4|5|6|2|4|3|3|2|3|3|4|0|1|1	0.01	0.04	0.01	0.04	0.01	-7.47	1.17	0.8
TLK2-529	O75486	SUPT3H	1|2|2|1|1|1	8	1.33	6	0|0|0|0|0|0|0|0|0|0|2|1|0|0|0|0|0|0|1|1|1|0|0|0|1|1|0|0|1|1|3|3|1|0|0|0|0|0|0|0|0|0|1|1|1	0.05	0.16	0.05	0.16	0.05	-2.94	3	0.71
TLK2-529	O75494	SRSF10	1|1|0|1|1|1	5	0.83	6	0|0|0|1|0|0|0|1|1|1|1|1|0|0|0|0|0|0|3|3|3|2|2|2|2|2|1|0|2|3|3|2|2|1|0|0|1|0|0|3|2|3|0|0|0	0	0	0	0	0	-6.69	0.78	0.89
TLK2-529	O75506	HSBP1	1|0|0|1|1|1	4	0.67	6	0|0|0|0|0|1|0|0|0|0|2|2|0|0|0|1|1|1|0|0|0|1|2|0|6|0|0|0|3|2|5|3|2|1|0|0|2|1|1|0|0|0|1|1|0	0	0	0	0	0	-6.28	0.77	0.89
TLK2-529	O75528	TADA3	1|0|0|2|4|3	10	1.67	6	0|0|0|1|1|4|0|0|0|0|0|1|0|0|0|0|0|1|0|0|0|0|0|0|0|0|0|0|0|0|0|0|0|3|0|1|0|0|0|1|1|0|0|0|0	0.25	0.72	0.25	0.72	0.25	-4.16	5.36	0.46
TLK2-529	O75529	TAF5L	2|1|3|2|2|3	13	2.17	6	0|0|0|0|0|0|0|1|2|0|2|2|0|0|0|0|0|0|0|0|0|0|0|0|1|1|0|1|0|1|0|0|1|0|0|0|0|0|0|0|0|0|0|0|0	0.4	0.7	0.4	0.7	0.4	-2.31	8.12	0.33
TLK2-529	O75530	EED	4|4|3|1|2|1	15	2.5	6	0|0|0|0|1|1|0|0|0|1|2|1|0|0|0|0|0|0|1|2|1|1|0|1|3|1|1|1|2|3|2|2|3|3|0|2|1|1|1|0|0|0|0|0|0	0.17	0.41	0.17	0.41	0.17	-4.46	2.96	0.54
TLK2-529	O75531	BANF1	1|3|2|0|1|0	7	1.17	6	0|0|0|0|0|0|0|0|0|1|1|3|0|0|0|0|0|0|7|8|9|0|1|1|2|0|0|0|1|1|1|3|0|0|0|0|0|0|0|0|0|0|4|2|1	0.03	0.14	0.03	0.14	0.03	-5.85	1.14	0.74
TLK2-529	O75533	SF3B1	86|94|86|73|75|69	483	80.5	6	9|8|7|42|42|42|3|6|5|50|65|68|14|13|9|38|43|39|20|21|19|51|56|53|60|20|16|20|60|60|49|52|50|43|25|20|26|26|29|47|49|47|23|33|31	0	0	0	0	0	-32.04	2.4	0.88
TLK2-529	O75534	CSDE1	14|13|13|9|11|12	72	12	6	10|9|12|60|65|67|4|3|3|41|49|49|7|7|8|43|38|41|10|13|13|31|32|28|38|3|3|3|41|40|30|30|32|31|33|34|35|43|43|36|39|34|23|37|27	0	0	0	0	0	-97	0.42	0.89
TLK2-529	O75554	WBP4	6|3|5|5|4|4	27	4.5	6	0|0|0|1|1|1|0|0|0|4|5|5|0|0|0|5|4|4|0|0|0|2|2|2|4|0|0|0|4|4|4|4|4|3|3|1|3|1|2|1|2|1|1|2|1	0.07	0.2	0.07	0.2	0.07	-4.75	2.5	0.68
TLK2-529	O75582	RPS6KA5	3|3|3|6|5|6	26	4.33	6	0|0|0|0|0|0|0|0|0|0|1|0|0|0|0|0|1|1|0|0|0|0|0|0|0|0|0|0|2|0|1|1|0|1|0|1|0|0|1|0|0|0|0|0|0	0.96	1	0.96	1	0.96	2.45	19.5	0.01
TLK2-529	O75607	NPM3	1|0|0|0|3|1	5	0.83	6	0|0|0|2|2|2|0|0|0|1|4|3|0|0|0|1|2|2|2|1|1|4|2|4|4|0|0|0|5|5|2|2|2|2|1|0|0|1|1|1|1|1|0|1|1	0.01	0.03	0.01	0.03	0.01	-8.09	0.6	0.82
TLK2-529	O75643	SNRNP200	65|73|68|49|66|63	384	64	6	8|3|4|23|25|26|5|16|8|44|60|59|1|0|1|13|14|11|43|39|44|40|34|36|48|18|19|18|52|54|51|47|47|20|23|18|14|12|14|52|50|51|14|17|17	0	0	0	0	0	-31.71	2.37	0.88
TLK2-529	O75663	TIPRL	41|44|38|34|36|35	228	38	6	5|4|3|40|39|35|0|0|1|13|16|14|2|0|0|12|12|11|4|4|4|10|12|10|14|3|3|2|13|17|14|16|16|46|35|48|26|35|40|13|17|15|20|25|26	0	0	0	0	0	-13.66	2.46	0.86
TLK2-529	O75694	NUP155	3|2|3|5|8|6	27	4.5	6	0|0|0|2|3|2|0|0|0|1|1|2|0|0|0|3|4|3|11|13|13|6|7|4|8|2|2|2|9|7|6|8|5|7|2|1|3|2|1|4|4|3|10|9|13	0	0	0	0	0	-14.07	1.11	0.85
TLK2-529	O75717	WDHD1	23|26|22|24|28|27	150	25	6	4|5|5|9|10|10|0|1|1|11|19|20|2|4|2|21|24|20|3|4|4|12|9|11|20|3|4|3|21|23|10|11|15|8|7|4|3|9|4|10|11|12|9|10|10	0.01	0.03	0.01	0.03	0.01	-7.5	2.69	0.79
TLK2-529	O75718	CRTAP	1|0|1|0|0|0	2	0.33	6	0|0|0|0|0|0|0|0|0|0|0|0|0|0|0|0|0|0|1|1|1|0|0|0|0|0|0|0|0|0|0|0|0|0|0|0|0|0|0|0|0|0|0|0|0	0	0	0	0	0	-3.34	3.33	0.89
TLK2-529	O75792	RNASEH2A	11|9|8|5|6|5	44	7.33	6	0|0|0|6|5|6|0|0|0|6|6|8|0|0|0|1|1|0|2|2|2|5|4|4|4|0|0|0|4|4|3|2|1|14|3|5|6|5|4|5|5|3|4|4|6	0.07	0.28	0.07	0.28	0.07	-6.33	2.36	0.68
TLK2-529	O75794	CDC123	2|1|0|1|0|0	4	0.67	6	0|0|0|1|1|1|0|0|0|4|4|4|0|0|0|0|0|0|1|1|1|1|1|1|3|1|1|0|2|2|3|2|2|0|0|0|0|3|0|1|2|1|1|1|2	0	0.02	0	0.02	0	-6.64	0.62	0.82
TLK2-529	O75808	CAPN15	1|0|2|1|2|1	7	1.17	6	0|0|0|0|0|0|0|0|0|0|2|1|0|0|0|0|1|0|0|0|0|0|0|0|1|0|0|0|1|1|1|0|1|1|0|0|0|1|1|0|0|0|0|0|0	0.11	0.33	0.11	0.33	0.11	-3.94	4.38	0.63
TLK2-529	O75818	RPP40	4|3|2|3|3|3	18	3	6	0|0|0|0|0|0|0|0|0|1|2|0|0|0|0|0|0|0|0|0|0|1|0|0|0|0|0|0|2|0|1|1|0|1|0|0|0|0|0|2|1|0|0|1|1	0.66	0.93	0.66	0.93	0.66	-0.93	9.64	0.14
TLK2-529	O75821	EIF3G	3|4|3|2|1|1	14	2.33	6	1|3|2|8|10|12|2|2|2|10|16|11|3|3|4|9|13|11|3|4|5|7|7|7|10|3|3|3|13|11|7|7|10|6|5|5|7|6|5|9|5|5|5|6|6	0	0	0	0	0	-26.76	0.36	0.89
TLK2-529	O75822	EIF3J	3|4|4|1|1|1	14	2.33	6	1|0|1|9|7|9|0|0|0|4|5|9|0|0|0|4|3|4|1|1|2|1|1|1|4|0|0|0|4|5|2|3|3|5|8|6|3|3|4|4|4|4|3|3|2	0	0	0	0	0	-12.1	0.79	0.86
TLK2-529	O75832	PSMD10	1|1|1|0|0|0	3	0.5	6	0|0|0|0|0|0|0|0|0|2|4|7|0|0|0|0|1|0|3|2|2|1|1|0|5|0|0|0|4|4|2|2|2|1|1|0|1|0|0|2|1|1|2|2|1	0	0	0	0	0	-7.05	0.42	0.89
TLK2-529	O75909	CCNK	9|15|17|17|17|15	90	15	6	3|3|1|6|8|3|0|1|2|4|5|5|1|1|0|2|2|4|0|1|1|3|4|3|5|1|1|1|6|7|5|4|3|5|6|3|3|3|2|4|6|7|3|4|4	0.85	1	0.85	1	0.85	-1.95	4.62	0.05
TLK2-529	O75934	BCAS2	12|9|9|7|8|7	52	8.67	6	1|2|2|4|3|4|1|0|0|5|8|8|0|0|0|1|1|1|3|3|4|7|5|6|11|3|1|2|11|7|10|7|9|6|3|4|6|6|5|5|7|7|0|1|0	0.02	0.11	0.02	0.11	0.02	-6.82	2.17	0.76
TLK2-529	O75937	DNAJC8	22|14|20|9|6|9	80	13.33	6	0|0|0|17|18|16|0|0|1|9|10|13|0|0|0|9|10|10|3|2|2|4|7|7|10|0|0|0|8|9|7|7|6|18|17|8|7|3|4|9|10|6|8|9|8	0.04	0.18	0.04	0.18	0.04	-16.47	2.05	0.72
TLK2-529	O75940	SMNDC1	6|3|3|6|6|8	32	5.33	6	0|0|0|7|3|4|0|0|0|3|2|2|0|0|1|2|3|3|1|1|1|4|3|2|2|0|0|0|3|3|1|2|2|3|5|4|8|8|6|2|1|5|0|2|1	0.08	0.28	0.08	0.28	0.08	-6.09	2.4	0.67
TLK2-529	O75943	RAD17	1|0|0|0|0|0	1	0.17	6	0|0|0|0|0|0|0|0|0|0|0|0|0|0|0|0|0|0|0|0|0|0|0|0|0|0|0|0|0|0|0|0|0|0|0|0|0|0|0|0|0|0|0|0|0	0	0	0	0	0	-3.34	1.67	0.89
TLK2-529	O75947	ATP5PD	1|1|1|1|0|0	4	0.67	6	0|0|0|0|0|0|0|0|0|0|0|1|0|0|0|1|1|1|1|1|1|2|2|2|2|0|0|0|4|3|4|2|3|0|0|0|0|0|1|2|2|3|0|0|2	0	0	0	0	0	-6.35	0.73	0.89
TLK2-529	O76003	GLRX3	9|6|5|2|4|3	29	4.83	6	0|1|0|13|11|13|0|1|0|4|8|9|0|0|0|4|4|5|6|9|7|5|6|6|5|0|2|1|8|7|7|6|7|5|6|3|2|5|6|5|2|2|4|5|5	0	0	0	0	0	-16.25	1.06	0.86
TLK2-529	O76064	RNF8	6|5|5|5|5|4	30	5	6	0|0|0|0|0|0|0|0|0|0|0|0|0|0|0|0|0|0|0|0|0|0|1|0|0|0|0|0|0|0|0|0|0|0|2|1|0|1|2|0|0|0|0|1|1	0.98	1	0.98	1	0.98	2.83	25	0
TLK2-529	O76094	SRP72	4|4|3|6|4|5	26	4.33	6	0|0|0|3|4|4|1|2|1|7|9|7|1|1|1|1|2|2|6|6|5|4|3|5|9|1|1|1|10|8|6|6|6|12|15|6|7|8|8|14|15|14|2|6|3	0	0	0	0	0	-16.56	0.84	0.88
TLK2-529	O94762	RECQL5	1|1|2|0|1|0	5	0.83	6	0|0|0|1|0|0|0|0|0|0|0|0|0|0|0|0|1|1|0|0|0|0|0|0|1|0|0|0|1|1|0|0|1|2|0|0|1|1|0|0|1|0|0|0|1	0.05	0.3	0.05	0.3	0.05	-4.02	2.88	0.71
TLK2-529	O94776	MTA2	17|18|16|13|16|18	98	16.33	6	3|1|1|4|5|5|3|3|1|10|15|17|0|0|0|4|4|7|5|3|5|8|9|7|13|5|7|6|11|13|8|13|10|7|8|7|6|9|9|13|9|8|4|6|5	0.01	0.03	0.01	0.03	0.01	-8.16	2.47	0.79
TLK2-529	O94842	TOX4	9|11|10|8|9|8	55	9.17	6	8|6|6|4|5|5|0|1|2|5|3|4|3|2|2|2|3|2|1|2|2|2|2|2|3|2|1|2|3|3|4|2|2|4|6|6|2|4|3|3|3|4|2|4|3	0.28	0.72	0.28	0.72	0.28	-2.68	2.95	0.43
TLK2-529	O94864	SUPT7L	3|1|1|3|4|3	15	2.5	6	0|0|0|0|2|1|0|0|0|0|3|4|0|0|0|0|0|0|1|2|2|0|0|2|3|1|1|1|0|1|1|1|1|2|0|1|0|1|0|0|1|1|0|1|2	0.15	0.4	0.15	0.4	0.15	-4.25	3.12	0.56
TLK2-529	O94880	PHF14	1|2|1|2|5|3	14	2.33	6	0|0|0|0|0|0|0|0|0|0|2|1|0|0|0|0|0|0|0|2|1|0|0|0|2|0|1|1|3|3|2|0|1|0|0|0|0|0|0|0|0|0|0|0|0	0.26	0.81	0.26	0.81	0.26	-2.67	5.53	0.45
TLK2-529	O94888	UBXN7	8|10|10|8|9|6	51	8.5	6	0|0|0|8|13|14|0|0|0|2|3|4|0|0|0|4|6|7|1|2|2|1|0|0|3|0|0|0|2|4|0|2|2|9|5|7|3|3|6|3|3|5|6|7|10	0.06	0.11	0.06	0.11	0.06	-5.49	2.6	0.7
TLK2-529	O94905	ERLIN2	1|0|1|0|0|0	2	0.33	6	0|1|1|1|1|1|0|0|1|0|0|0|0|0|0|0|0|0|2|1|2|1|0|0|0|3|2|2|1|1|0|0|1|2|2|1|0|0|0|1|0|0|0|0|0	0	0	0	0	0	-5.17	0.54	0.89
TLK2-529	O94906	PRPF6	6|4|5|4|7|6	32	5.33	6	0|0|0|1|2|3|2|4|3|5|6|7|0|0|0|1|0|0|9|8|7|6|6|5|10|4|4|7|9|10|6|7|6|7|2|1|2|0|0|9|10|9|1|2|1	0	0	0	0	0	-10.93	1.32	0.86
TLK2-529	O94913	PCF11	11|8|8|11|14|11	63	10.5	6	0|0|0|1|1|2|0|0|0|4|12|10|0|0|1|9|9|12|1|0|2|6|11|10|9|1|1|1|13|15|10|10|13|2|1|3|4|3|1|7|4|4|4|2|2	0.03	0.11	0.03	0.11	0.03	-6.91	2.35	0.75
TLK2-529	O94916	NFAT5	1|0|0|3|1|0	5	0.83	6	0|1|0|0|0|0|0|0|0|0|1|0|0|0|1|0|0|0|0|0|0|0|0|0|0|0|0|0|0|1|1|1|1|1|1|1|0|0|0|0|0|0|0|0|0	0.13	0.77	0.13	0.77	0.13	-3.78	3.75	0.59
TLK2-529	O94992	HEXIM1	8|7|10|6|5|6	42	7	6	1|1|3|4|5|6|0|1|0|5|6|5|0|1|0|1|2|2|0|1|0|7|7|6|5|0|0|0|10|7|7|5|6|5|5|1|2|2|2|2|3|1|3|1|2	0.06	0.24	0.06	0.24	0.06	-5.89	2.37	0.7
TLK2-529	O95059	RPP14	1|1|1|0|1|1	5	0.83	6	0|0|0|0|1|0|0|0|0|1|2|1|0|0|0|0|0|0|0|1|0|1|1|1|0|0|0|0|1|1|1|1|1|1|1|0|1|0|1|0|0|0|0|0|0	0	0	0	0	0	-4.42	2.08	0.89
TLK2-529	O95071	UBR5	4|1|1|1|5|3	15	2.5	6	0|0|0|0|0|0|0|0|0|0|2|2|1|0|0|2|1|1|1|2|1|2|4|2|2|0|0|0|4|1|1|2|2|1|0|1|0|1|1|2|0|0|0|0|1	0.18	0.63	0.18	0.63	0.18	-4.57	2.81	0.53
TLK2-529	O95104	SCAF4	8|8|8|3|4|4	35	5.83	6	0|0|0|3|4|4|0|0|0|2|2|2|0|0|0|6|2|2|0|0|0|2|3|1|3|0|0|1|2|2|2|2|3|3|2|3|2|2|2|2|1|2|1|1|0	0.46	0.87	0.46	0.87	0.46	-3.97	3.8	0.28
TLK2-529	O95163	ELP1	4|0|2|2|3|1	12	2	6	1|2|0|9|8|9|0|0|0|7|9|12|0|1|0|6|8|6|6|9|5|11|7|9|16|0|1|0|16|15|14|8|11|9|5|4|4|5|6|10|9|11|11|9|9	0	0	0	0	0	-30.39	0.3	0.89
TLK2-529	O95197	RTN3	2|1|0|0|2|1	6	1	6	0|0|0|0|1|0|0|0|0|0|0|0|1|2|3|3|1|0|0|0|0|0|0|0|0|1|0|0|0|0|2|0|1|0|1|0|2|1|1|1|1|2|3|0|2	0.03	0.09	0.03	0.09	0.03	-5.33	1.55	0.74
TLK2-529	O95218	ZRANB2	10|9|10|9|8|9	55	9.17	6	0|2|0|11|23|21|0|1|0|9|11|11|4|5|3|24|19|22|5|5|5|18|13|13|13|0|1|1|16|13|9|11|11|8|7|2|8|8|9|9|10|14|3|8|7	0	0	0	0	0	-21.44	1.05	0.89
TLK2-529	O95219	SNX4	1|1|2|1|1|1	7	1.17	6	0|0|0|5|7|6|0|0|0|2|7|5|0|0|0|8|7|9|1|1|1|7|8|8|6|0|0|0|12|7|6|8|9|9|6|7|5|2|2|5|6|5|5|4|5	0	0	0	0	0	-17.11	0.27	0.89
TLK2-529	O95232	LUC7L3	9|4|6|6|6|7	38	6.33	6	1|1|2|3|3|3|0|0|1|1|4|3|1|1|1|4|3|3|6|7|5|5|3|3|2|1|1|2|5|2|4|1|1|4|3|4|3|6|6|4|4|4|4|4|3	0.09	0.46	0.09	0.46	0.09	-7.53	2.16	0.65
TLK2-529	O95239	KIF4A	10|12|10|9|10|7	58	9.67	6	2|2|1|6|6|7|0|0|0|2|4|4|0|0|0|3|3|3|0|1|1|1|1|1|2|0|0|1|4|3|2|1|0|5|7|4|3|4|4|3|4|2|2|3|5	0.56	0.88	0.56	0.88	0.56	-1.99	4.07	0.2
TLK2-529	O95248	SBF1	1|0|0|0|2|1	4	0.67	6	0|0|0|0|0|0|0|0|0|0|0|0|0|0|0|0|0|0|0|0|0|0|0|0|0|0|0|0|0|0|0|0|0|0|2|0|2|1|3|1|0|0|0|0|0	0.07	0.4	0.07	0.4	0.07	-3.74	3.33	0.68
TLK2-529	O95251	KAT7	4|3|3|6|5|4	25	4.17	6	0|0|0|1|2|2|0|0|0|4|5|3|0|0|0|0|0|0|3|1|2|0|1|0|7|0|0|0|6|4|5|3|3|1|3|3|6|2|0|1|6|5|0|1|0	0.06	0.18	0.06	0.18	0.06	-4.45	2.34	0.69
TLK2-529	O95260	ATE1	1|1|2|0|2|2	8	1.33	6	0|0|0|4|4|5|0|0|0|8|12|13|0|1|1|15|17|12|0|1|0|11|10|9|12|0|0|0|14|12|11|10|8|4|2|1|1|2|3|8|5|9|1|1|1	0	0	0	0	0	-23.2	0.26	0.89
TLK2-529	O95292	VAPB	2|1|1|2|2|4	12	2	6	1|1|1|9|11|10|0|0|0|3|6|4|2|1|1|8|8|7|1|2|2|7|6|6|7|0|2|1|10|6|11|6|8|10|3|6|6|10|8|4|3|5|6|5|7	0	0	0	0	0	-20.05	0.41	0.89
TLK2-529	O95340	PAPSS2	1|1|2|1|1|1	7	1.17	6	0|0|0|1|0|0|0|0|0|0|0|0|0|0|0|0|0|0|1|1|1|0|1|2|1|0|0|0|0|0|0|1|1|2|1|1|0|0|0|0|0|0|0|3|2	0.03	0.17	0.03	0.17	0.03	-2.89	2.76	0.75
TLK2-529	O95347	SMC2	6|7|5|6|2|2	28	4.67	6	1|0|1|9|8|7|1|1|2|5|11|11|3|0|3|11|8|11|8|9|10|9|5|8|8|5|6|5|11|12|14|10|12|12|9|8|9|8|8|10|15|17|5|9|12	0	0	0	0	0	-29.19	0.61	0.89
TLK2-529	O95372	LYPLA2	13|16|17|18|19|27	110	18.33	6	2|3|2|9|10|11|0|0|0|2|4|5|2|0|0|6|5|6|1|1|1|1|1|0|4|1|0|0|4|7|2|4|3|2|3|5|1|1|1|2|5|4|3|5|5	0.87	1	0.87	1	0.87	0.44	6.16	0.04
TLK2-529	O95373	IPO7	5|6|2|5|6|4	28	4.67	6	1|0|1|5|4|5|1|0|0|9|13|10|1|0|1|6|11|8|8|7|5|8|8|7|10|0|1|1|10|11|8|12|9|5|1|4|4|3|4|13|12|12|6|6|4	0	0	0	0	0	-20.63	0.82	0.88
TLK2-529	O95391	SLU7	7|14|10|11|11|11	64	10.67	6	0|0|0|4|3|5|0|0|0|3|5|7|0|0|0|6|5|6|1|0|1|5|5|4|5|0|0|0|6|7|7|5|6|4|2|1|2|2|3|3|6|5|2|4|3	0.4	0.83	0.4	0.83	0.4	-3.68	3.61	0.32
TLK2-529	O95400	CD2BP2	3|3|4|3|2|4	19	3.17	6	0|0|0|2|3|4|0|0|0|3|3|3|0|0|3|3|3|4|3|3|2|4|2|4|1|1|1|1|3|2|2|1|1|1|0|1|2|2|1|1|2|1|0|0|0	0.02	0.05	0.02	0.05	0.02	-5.77	1.95	0.76
TLK2-529	O95429	BAG4	1|0|0|0|2|1	4	0.67	6	0|0|0|0|0|0|0|0|0|2|3|3|0|1|1|1|0|1|0|0|0|3|5|5|1|0|0|1|1|1|1|2|1|0|0|0|0|1|1|0|0|1|0|0|1	0.01	0.06	0.01	0.06	0.01	-6.08	0.81	0.79
TLK2-529	O95433	AHSA1	10|10|12|16|13|12	73	12.17	6	3|5|5|16|25|19|4|9|7|21|23|24|7|4|4|28|25|23|10|8|9|18|17|19|18|8|12|9|18|17|22|21|18|31|26|31|16|19|17|16|19|22|12|12|15	0	0	0	0	0	-44.59	0.77	0.89
TLK2-529	O95450	ADAMTS2	1|0|0|0|0|0	1	0.17	6	0|0|0|0|0|0|0|0|0|0|0|0|0|0|0|0|0|0|0|0|0|0|0|0|0|0|0|0|0|0|0|0|0|0|0|0|0|0|0|0|0|0|0|0|0	0	0	0	0	0	-3.34	1.67	0.89
TLK2-529	O95453	PARN	7|10|7|6|5|5	40	6.67	6	0|0|0|4|3|6|0|0|0|4|6|7|0|0|0|9|7|7|2|1|2|5|4|5|8|0|0|0|9|10|5|7|8|6|4|3|6|6|5|5|7|5|2|3|3	0.01	0.03	0.01	0.03	0.01	-8.94	1.72	0.81
TLK2-529	O95486	SEC24A	1|2|1|0|0|0	4	0.67	6	0|0|0|5|6|5|0|0|0|11|14|14|1|1|0|15|17|17|2|1|2|6|8|9|19|0|1|0|17|16|9|9|10|10|4|3|5|3|3|7|9|8|3|4|4	0	0	0	0	0	-28.13	0.11	0.89
TLK2-529	O95551	TDP2	2|5|4|1|0|1	13	2.17	6	0|0|0|4|4|5|0|0|0|0|0|0|0|0|0|0|0|0|0|0|0|0|0|0|0|0|0|0|0|0|0|0|0|3|2|2|0|0|0|0|0|1|1|1|0	0.21	0.62	0.21	0.62	0.21	-4.98	4.24	0.5
TLK2-529	O95630	STAMBP	1|2|2|1|1|1	8	1.33	6	0|0|0|4|5|4|0|0|0|0|1|3|0|0|0|3|2|3|0|0|0|0|1|0|3|0|0|0|3|4|3|3|3|3|3|2|3|1|4|1|0|0|3|4|4	0	0	0	0	0	-7.13	0.82	0.84
TLK2-529	O95639	CPSF4	6|7|5|5|5|7	35	5.83	6	0|0|0|1|1|1|1|1|1|2|3|4|1|1|1|1|1|2|2|2|3|3|4|3|4|1|1|3|3|4|3|2|3|2|2|5|5|5|4|3|3|3|1|2|1	0.12	0.26	0.12	0.26	0.12	-3.56	2.65	0.62
TLK2-529	O95721	SNAP29	4|2|2|3|3|3	17	2.83	6	1|0|0|11|13|17|0|0|0|4|6|7|0|0|0|6|6|7|0|0|0|5|3|4|6|0|1|2|7|7|5|5|4|8|8|5|4|5|5|4|4|3|5|7|7	0	0	0	0	0	-14.95	0.66	0.89
TLK2-529	O95747	OXSR1	1|1|2|0|1|1	6	1	6	0|0|0|7|7|6|0|0|0|7|12|12|0|0|0|13|13|12|2|2|1|7|3|4|10|0|0|0|9|8|8|6|5|2|1|1|3|3|1|5|4|4|4|4|6	0	0	0	0	0	-19.89	0.23	0.89
TLK2-529	O95757	HSPA4L	8|7|11|9|10|8	53	8.83	6	2|0|2|6|8|11|0|1|1|16|21|21|0|0|0|12|11|14|8|8|5|16|16|14|24|0|0|0|23|21|14|16|14|9|4|5|5|6|3|18|13|13|9|10|9	0	0	0	0	0	-24.13	0.97	0.89
TLK2-529	O95782	AP2A1	1|1|1|0|0|0	3	0.5	6	0|0|0|2|1|2|0|0|0|1|4|2|0|0|0|0|0|0|1|1|1|2|1|2|4|0|0|0|3|4|3|2|3|1|1|0|0|0|1|1|0|0|0|0|0	0	0	0	0	0	-6.53	0.52	0.89
TLK2-529	O95785	WIZ	5|5|8|3|3|3	27	4.5	6	0|0|0|1|0|0|0|0|0|2|4|4|0|0|0|4|6|5|1|1|0|1|2|2|4|1|0|0|4|5|4|5|4|3|2|1|3|1|1|2|2|1|0|1|2	0.12	0.53	0.12	0.53	0.12	-4.55	2.56	0.61
TLK2-529	O95793	STAU1	7|8|7|6|4|3	35	5.83	6	0|0|1|2|2|2|0|0|2|16|25|26|2|3|1|5|6|6|9|11|10|6|6|5|24|2|2|2|23|22|22|21|19|11|8|9|7|7|5|15|14|16|3|4|2	0	0	0	0	0	-29.58	0.68	0.89
TLK2-529	O95816	BAG2	7|8|4|5|6|6	36	6	6	3|3|4|0|1|2|1|2|1|12|11|12|0|0|0|0|0|0|4|3|3|6|7|6|9|1|2|2|9|9|8|7|6|5|4|3|2|2|3|5|3|6|2|5|5	0	0	0	0	0	-10.7	1.51	0.85
TLK2-529	O95817	BAG3	10|6|5|5|6|7	39	6.5	6	1|1|4|17|15|15|0|1|1|9|20|20|3|1|2|19|21|21|1|1|0|14|14|15|23|1|5|6|18|26|15|19|22|13|19|9|13|11|11|12|17|19|6|11|11	0	0	0	0	0	-35.98	0.58	0.89
TLK2-529	O95831	AIFM1	7|8|9|2|3|2	31	5.17	6	1|1|2|4|5|3|0|0|1|1|4|3|3|2|4|2|3|2|2|5|6|3|1|2|3|3|5|5|1|2|0|0|0|5|4|3|3|5|4|4|5|4|3|6|6	0.1	0.42	0.1	0.42	0.1	-10.33	1.77	0.64
TLK2-529	O95861	BPNT1	1|1|0|0|1|1	4	0.67	6	0|0|0|7|8|8|0|0|0|1|1|3|0|0|0|6|8|5|1|1|2|2|2|3|6|0|0|0|5|5|2|2|2|7|4|3|5|6|6|5|6|6|6|6|6	0	0	0	0	0	-15.68	0.21	0.89
TLK2-529	O95926	SYF2	1|1|1|2|3|3	11	1.83	6	0|0|0|0|1|0|0|0|0|2|1|1|0|0|0|2|1|1|0|0|0|0|0|0|1|0|0|0|1|1|1|1|1|1|1|0|1|1|1|1|2|1|0|0|0	0.14	0.35	0.14	0.35	0.14	-3.29	3.44	0.58
TLK2-529	O95983	MBD3	7|7|6|8|9|9	46	7.67	6	2|2|1|3|5|3|1|2|0|6|5|7|0|0|0|1|1|2|1|2|2|4|5|6|7|1|4|3|3|7|5|6|7|1|2|1|1|2|1|5|5|4|4|3|2	0.08	0.17	0.08	0.17	0.08	-4.93	2.56	0.67
TLK2-529	O96006	ZBED1	2|1|1|1|2|2	9	1.5	6	0|0|0|0|0|0|0|0|0|0|0|0|0|0|0|0|0|0|0|0|0|0|0|0|0|0|0|0|2|0|1|1|1|0|0|0|0|0|0|1|1|1|0|0|0	0.29	0.57	0.29	0.57	0.29	-1.79	8.44	0.43
TLK2-529	O96007	MOCS2	1|2|1|1|3|2	10	1.67	6	0|0|0|8|9|10|0|0|0|5|9|9|0|0|0|6|9|8|0|1|0|9|7|6|9|0|0|0|9|9|7|7|8|7|5|3|4|3|3|6|9|8|5|3|4	0	0	0	0	0	-18.42	0.37	0.89
TLK2-529	O96008	TOMM40	4|1|1|3|3|3	15	2.5	6	0|0|0|1|1|1|2|2|1|1|1|2|3|2|0|0|0|0|1|1|1|4|3|3|2|4|2|3|1|2|2|2|2|4|3|2|2|1|4|4|3|2|4|6|6	0	0.01	0	0.01	0	-8.6	1.24	0.82
TLK2-529	O96019	ACTL6A	10|10|9|6|7|8	50	8.33	6	0|0|1|0|2|1|3|7|4|4|6|5|0|0|0|0|0|0|4|4|3|4|2|4|4|5|5|5|7|5|5|7|5|3|2|2|0|2|1|3|4|4|1|1|1	0.2	0.41	0.2	0.41	0.2	-4.29	2.98	0.51
TLK2-529	P00338	LDHA	7|8|8|3|3|6	35	5.83	6	1|3|2|17|16|15|1|4|2|6|10|12|10|10|9|10|9|10|14|11|13|11|11|11|12|3|4|5|13|13|13|12|12|8|7|5|6|8|5|9|10|9|7|11|9	0	0	0	0	0	-31.62	0.66	0.89
TLK2-529	P00374	DHFR	2|0|1|0|0|0	3	0.5	6	2|1|1|1|0|1|0|0|0|0|0|0|0|0|0|0|0|0|1|2|1|1|0|0|0|0|0|0|0|0|0|0|0|2|1|0|1|0|1|0|0|0|1|1|2	0.03	0.16	0.03	0.16	0.03	-4.58	1.12	0.75
TLK2-529	P00387	CYB5R3	2|3|4|0|2|1	12	2	6	0|0|0|7|5|4|0|0|0|0|2|4|3|2|2|2|2|4|7|7|5|3|3|2|3|0|0|0|3|1|2|1|2|2|2|2|3|3|4|2|3|3|5|6|5	0	0	0	0	0	-13.05	0.78	0.85
TLK2-529	P00403	MT-CO2	2|3|4|2|1|2	14	2.33	6	0|0|0|0|0|0|0|0|0|0|1|0|0|1|0|0|0|0|2|2|3|2|1|0|0|0|0|0|0|0|0|0|0|1|1|1|0|0|0|0|0|0|1|1|1	0.29	0.77	0.29	0.77	0.29	-2.77	5.83	0.42
TLK2-529	P00491	PNP	2|3|1|3|3|2	14	2.33	6	0|0|0|12|13|12|0|0|0|1|3|3|0|0|0|1|1|1|0|0|0|2|2|3|2|0|0|0|2|4|1|1|3|5|2|4|3|5|5|0|0|0|9|7|11	0	0	0	0	0	-10.42	0.89	0.85
TLK2-529	P00492	HPRT1	1|1|1|1|4|3	11	1.83	6	0|0|0|3|3|3|1|1|1|3|4|3|1|2|1|0|2|1|3|2|2|3|2|2|4|1|2|2|5|5|6|7|6|1|1|1|0|1|1|5|7|6|5|5|6	0	0	0	0	0	-11.05	0.69	0.86
TLK2-529	P00558	PGK1	4|6|5|0|0|0	15	2.5	6	0|0|0|19|17|18|0|0|0|1|1|2|4|4|5|1|4|4|17|14|15|4|4|7|6|0|0|0|3|4|4|3|3|4|3|1|0|4|2|2|2|5|6|6|5	0	0	0	0	0	-20.91	0.55	0.87
TLK2-529	P00846	MT-ATP6	1|1|1|0|0|0	3	0.5	6	1|1|1|0|0|0|1|2|1|0|0|0|1|1|1|0|0|0|0|1|1|0|0|0|0|1|1|1|0|0|0|0|0|1|0|0|1|0|0|2|2|0|2|1|1	0	0	0	0	0	-4.98	0.9	0.89
TLK2-529	P02545	LMNA	3|2|3|0|3|1	12	2	6	0|2|0|8|8|8|0|0|0|0|0|1|0|0|0|0|0|0|7|8|9|0|0|0|1|1|3|4|0|0|0|0|0|3|1|6|2|4|3|3|3|1|5|9|8	0	0	0	0	0	-11.86	0.83	0.85
TLK2-529	P04075	ALDOA	4|4|6|0|0|0	14	2.33	6	0|0|0|15|9|7|0|0|0|3|4|5|0|0|0|1|1|2|1|3|5|5|4|6|6|0|0|0|7|7|3|4|5|6|5|4|3|3|3|3|4|5|6|5|6	0	0	0	0	0	-16.62	0.67	0.86
TLK2-529	P04083	ANXA1	5|7|7|6|6|7	38	6.33	6	2|1|1|29|32|32|0|0|0|16|19|22|0|0|0|21|17|20|4|5|4|22|17|21|21|0|0|0|21|22|20|20|21|18|13|21|18|20|17|13|15|16|20|18|20	0	0	0	0	0	-46.36	0.46	0.89
TLK2-529	P04150	NR3C1	3|5|4|3|5|5	25	4.17	6	3|1|0|8|7|9|0|0|0|7|6|5|2|2|3|11|10|11|1|1|2|3|5|6|7|0|1|0|6|5|5|4|3|6|5|4|4|5|5|7|8|8|4|5|5	0	0	0	0	0	-14.08	0.94	0.88
TLK2-529	P04183	TK1	2|5|7|2|4|4	24	4	6	0|0|0|7|7|5|0|0|0|6|5|4|0|0|0|3|3|1|0|0|0|3|3|3|4|0|0|0|3|6|2|3|3|1|1|0|1|0|0|5|5|6|1|1|2	0.04	0.18	0.04	0.18	0.04	-7.03	1.91	0.72
TLK2-529	P04350	TUBB4A	5|6|6|7|8|9	41	6.83	6	0|2|0|0|0|0|2|2|2|2|3|4|2|1|2|0|2|1|5|6|3|2|0|2|1|1|1|2|1|1|1|2|1|4|6|1|4|4|7|1|3|2|2|2|4	0.3	0.74	0.3	0.74	0.3	-3.22	3.27	0.41
TLK2-529	P04406	GAPDH	11|10|10|1|2|4	38	6.33	6	1|0|1|24|25|25|0|1|1|2|4|2|7|8|6|3|3|4|14|14|14|7|8|7|1|0|0|0|1|1|1|1|1|3|3|2|2|3|3|4|6|5|5|3|9	0	0	0	0	0	-20.68	1.21	0.85
TLK2-529	P04632	CAPNS1	3|3|2|1|1|1	11	1.83	6	0|0|0|0|1|1|0|0|0|1|5|3|0|0|0|3|3|2|3|2|2|4|4|7|6|0|0|0|5|6|3|4|5|3|0|1|3|2|0|7|1|2|1|1|1	0	0	0	0	0	-8.37	0.9	0.84
TLK2-529	P04792	HSPB1	2|3|3|4|3|2	17	2.83	6	4|4|2|12|13|14|3|4|4|8|10|9|2|2|4|11|8|10|7|6|5|9|9|8|8|4|5|5|7|9|7|9|8|7|8|5|7|9|9|10|8|9|8|12|12	0	0	0	0	0	-28.24	0.38	0.89
TLK2-529	P04843	RPN1	10|12|10|6|7|5	50	8.33	6	2|1|2|9|7|7|4|5|5|4|4|4|2|1|2|2|1|2|14|13|12|8|11|13|6|1|7|5|6|6|5|6|7|7|5|6|3|3|2|9|7|8|14|15|12	0	0	0	0	0	-16.83	1.36	0.87
TLK2-529	P04844	RPN2	4|5|4|3|3|4	23	3.83	6	3|3|3|0|0|0|2|0|2|2|2|2|3|3|1|0|0|0|16|15|15|8|7|6|1|2|2|1|1|0|2|1|2|1|1|0|4|6|3|4|3|3|4|6|7	0	0	0	0	0	-9.45	1.17	0.86
TLK2-529	P05023	ATP1A1	8|12|7|9|8|10	54	9	6	1|2|1|9|12|8|1|1|2|2|3|6|3|2|4|4|4|5|9|9|7|10|11|10|8|4|7|5|6|7|3|9|9|14|14|10|9|13|11|14|13|12|18|16|13	0	0	0	0	0	-19.09	1.19	0.88
TLK2-529	P05141	SLC25A5	8|5|4|5|5|6	33	5.5	6	3|5|2|3|4|3|3|6|4|3|3|4|5|5|5|2|1|1|6|4|4|3|2|5|3|5|3|4|2|2|1|2|1|5|2|4|6|6|5|2|4|5|3|5|4	0	0.02	0	0.02	0	-9.62	1.55	0.83
TLK2-529	P05165	PCCA	39|39|42|43|53|49	265	44.17	6	272|310|257|18|20|18|414|489|429|16|20|21|297|315|321|16|16|18|252|259|285|13|12|12|20|428|408|376|17|16|12|14|15|16|15|12|10|14|13|23|18|25|14|13|16	0	0	0	0	0	-420	0.36	0.89
TLK2-529	P05166	PCCB	49|50|46|47|48|44	284	47.33	6	170|182|146|14|12|16|274|313|326|11|17|18|35|32|34|0|0|0|100|101|97|10|11|11|11|244|182|175|10|9|9|13|11|13|12|10|15|17|12|12|11|15|11|12|15	0	0	0	0	0	-154.38	0.77	0.89
TLK2-529	P05198	EIF2S1	6|7|3|11|3|5	35	5.83	6	3|2|3|9|12|9|1|2|3|12|13|11|3|1|1|9|10|10|10|10|10|15|12|10|15|3|1|1|16|14|12|11|13|6|7|5|20|16|20|23|15|14|5|3|6	0	0	0	0	0	-31.96	0.64	0.89
TLK2-529	P05386	RPLP1	2|2|2|2|2|2	12	2	6	2|1|2|3|2|1|3|4|4|3|3|4|1|1|4|1|1|1|2|2|2|1|1|1|2|2|2|2|3|3|1|1|1|0|1|1|0|0|0|1|1|1|1|0|1	0	0	0	0	0	-5.78	1.22	0.83
TLK2-529	P05387	RPLP2	7|9|6|6|5|8	41	6.83	6	8|7|4|13|14|12|7|10|12|7|4|5|8|7|5|5|3|2|7|10|9|7|6|5|3|4|3|3|2|5|1|2|3|4|7|9|9|10|11|6|6|5|7|7|6	0	0	0	0	0	-18.33	1.06	0.88
TLK2-529	P05388	RPLP0	6|7|7|5|4|4	33	5.5	6	2|4|1|8|12|11|11|9|10|6|9|8|2|6|3|0|0|0|10|12|11|8|6|8|8|5|6|6|5|8|5|4|5|6|7|5|1|3|3|6|6|7|4|6|6	0	0	0	0	0	-18.22	0.92	0.88
TLK2-529	P05412	JUN	8|8|6|7|8|8	45	7.5	6	0|0|0|2|1|1|0|0|0|3|3|4|0|0|0|0|0|0|0|0|1|1|1|0|1|0|0|0|1|2|1|0|1|3|4|4|5|4|4|2|2|2|0|0|0	0.68	0.76	0.68	0.76	0.68	-0.22	6.37	0.13
TLK2-529	P05423	POLR3D	1|0|0|0|1|2	4	0.67	6	0|0|0|0|0|0|0|0|0|0|0|2|0|0|0|2|2|1|0|0|0|1|1|1|2|0|0|0|1|0|0|0|0|0|0|0|0|0|0|0|0|0|0|0|0	0.05	0.3	0.05	0.3	0.05	-4.03	2.31	0.71
TLK2-529	P05455	SSB	10|11|14|12|14|11	72	12	6	1|1|1|28|25|26|1|3|2|28|41|40|2|1|2|30|34|35|14|15|16|29|26|27|31|2|0|1|35|38|33|31|31|13|8|8|5|7|5|33|30|33|9|15|13	0	0	0	0	0	-52.45	0.67	0.89
TLK2-529	P05783	KRT18	10|12|11|6|8|7	54	9	6	36|40|27|46|53|46|2|6|4|15|20|20|5|2|2|8|11|9|24|26|25|9|7|9|10|12|15|15|12|12|14|9|9|30|34|25|25|32|26|20|20|22|19|20|22	0	0	0	0	0	-65.49	0.47	0.89
TLK2-529	P06493	CDK1	4|2|2|4|3|2	17	2.83	6	0|0|0|12|8|11|0|0|0|5|8|8|0|0|0|2|5|4|8|6|9|8|6|6|9|1|0|0|10|9|5|11|9|8|5|7|3|7|8|5|3|7|8|9|8	0	0	0	0	0	-19.11	0.54	0.89
TLK2-529	P06576	ATP5F1B	7|8|6|2|2|0	25	4.17	6	1|1|1|3|4|5|2|2|1|3|6|3|3|5|2|6|5|8|30|33|30|20|20|19|2|8|9|9|3|4|4|3|4|3|4|3|5|5|6|7|6|5|12|14|12	0	0	0	0	0	-34.17	0.55	0.89
TLK2-529	P06730	EIF4E	1|0|0|0|0|0	1	0.17	6	0|1|0|6|4|5|0|0|0|1|6|8|1|1|0|6|7|6|2|2|2|5|4|6|5|3|3|2|6|7|6|7|7|4|4|3|3|5|8|7|4|2|2|2|3	0	0	0	0	0	-17.83	0.05	0.89
TLK2-529	P06733	ENO1	18|17|20|5|6|9	75	12.5	6	6|8|7|46|56|48|3|2|2|14|12|15|16|14|14|14|17|16|40|40|37|18|18|22|13|1|2|1|11|16|9|11|10|19|16|19|23|24|26|13|14|15|25|26|26	0	0	0	0	0	-63.39	0.7	0.89
TLK2-529	P06737	PYGL	1|0|0|0|0|0	1	0.17	6	0|0|0|15|13|13|0|0|0|12|20|21|0|0|0|18|18|19|5|4|5|18|15|20|24|0|0|0|26|26|21|22|20|12|10|8|9|13|8|17|16|21|11|9|10	0	0	0	0	0	-49.82	0.02	0.89
TLK2-529	P06748	NPM1	49|52|54|41|36|38	270	45	6	12|17|10|54|49|50|13|18|17|43|54|58|16|15|12|43|43|46|43|40|38|31|33|32|40|15|15|9|35|44|37|36|36|67|79|101|51|53|55|58|56|60|14|15|18	0	0	0	0	0	-81.25	1.2	0.89
TLK2-529	P06753	TPM3	1|0|0|0|0|0	1	0.17	6	0|0|0|1|2|1|0|0|0|1|1|2|0|0|0|0|0|0|0|0|1|0|0|0|1|0|0|0|3|2|0|3|3|2|2|1|0|0|0|1|2|1|1|2|2	0	0	0	0	0	-5.78	0.21	0.89
TLK2-529	P07195	LDHB	8|7|9|5|7|5	41	6.83	6	1|1|2|16|16|15|1|2|2|8|11|12|11|10|9|11|9|9|17|15|13|11|8|8|12|1|2|2|11|11|11|10|11|9|7|6|9|10|9|8|11|9|7|12|11	0	0	0	0	0	-27.17	0.77	0.89
TLK2-529	P07237	P4HB	6|5|4|0|0|1	16	2.67	6	0|0|0|4|5|5|0|0|0|1|1|4|0|0|0|4|4|3|13|14|12|5|6|4|5|1|0|3|6|5|5|3|4|4|2|1|1|3|3|4|2|2|3|5|6	0	0	0	0	0	-16.26	0.78	0.85
TLK2-529	P07305	H1-0	1|1|0|0|0|0	2	0.33	6	0|0|0|0|0|0|1|3|2|0|0|0|2|1|1|0|0|0|0|0|0|1|1|1|1|0|0|0|1|1|0|0|0|0|0|1|1|1|0|1|0|0|0|0|0	0	0	0	0	0	-4.55	0.75	0.89
TLK2-529	P07355	ANXA2	5|5|8|4|3|2	27	4.5	6	6|5|4|68|77|73|9|9|11|104|101|99|7|7|7|69|67|74|7|8|12|68|66|65|85|9|6|7|89|86|85|69|61|23|19|28|22|26|28|114|118|113|26|32|34	0	0	0	0	0	-198.95	0.1	0.89
TLK2-529	P07437	TUBB	31|36|28|29|29|28	181	30.17	6	7|5|4|9|9|11|8|9|6|20|18|19|9|9|7|11|12|11|23|21|22|14|16|16|11|8|6|6|11|10|12|13|12|5|7|7|14|13|15|24|27|28|12|13|13	0	0.02	0	0.02	0	-10.34	2.41	0.82
TLK2-529	P07737	PFN1	2|4|4|1|1|1	13	2.17	6	0|0|1|4|3|4|0|0|0|0|0|1|4|3|5|4|5|5|6|6|7|1|1|1|0|0|0|0|0|0|0|0|0|5|8|6|3|6|4|1|0|0|2|2|2	0	0.01	0	0.01	0	-9.02	0.97	0.83
TLK2-529	P07741	APRT	1|1|0|0|0|0	2	0.33	6	0|0|0|1|1|1|0|0|0|0|0|0|2|1|2|0|0|0|4|3|4|0|0|0|0|0|0|0|1|1|0|0|0|0|0|0|0|0|0|0|0|0|0|0|1	0	0	0	0	0	-4.84	0.68	0.89
TLK2-529	P07900	HSP90AA1	12|12|10|9|7|9	59	9.83	6	2|2|3|12|16|14|7|14|8|24|33|37|11|6|6|27|29|26|39|40|36|19|17|20|25|7|7|8|29|27|19|21|17|8|11|9|8|10|11|18|21|21|12|17|16	0	0	0	0	0	-55.51	0.57	0.89
TLK2-529	P07910	HNRNPC	12|12|13|6|9|8	60	10	6	5|5|4|3|5|4|6|9|8|10|12|12|3|3|2|0|0|0|25|25|23|5|2|3|5|5|5|4|9|8|9|10|9|9|13|16|6|11|12|12|14|12|7|10|10	0	0	0	0	0	-22.74	1.22	0.88
TLK2-529	P07992	ERCC1	5|4|3|3|2|4	21	3.5	6	0|0|0|2|1|4|0|0|0|1|2|4|0|0|0|2|2|3|0|0|0|2|3|2|4|0|0|0|3|3|3|2|2|2|0|2|0|2|1|3|3|3|2|3|4	0.06	0.18	0.06	0.18	0.06	-5.45	2.25	0.7
TLK2-529	P08133	ANXA6	2|0|0|0|0|0	2	0.33	6	0|0|0|12|12|13|0|0|0|3|10|12|0|0|0|11|11|12|9|7|9|11|10|10|15|0|0|0|16|13|12|13|14|4|2|0|2|2|3|7|5|7|5|3|2	0	0	0	0	0	-28.09	0.05	0.89
TLK2-529	P08195	SLC3A2	2|3|2|1|0|0	8	1.33	6	1|0|1|9|8|12|0|0|1|2|0|2|2|3|3|0|0|0|1|1|1|2|4|5|2|2|1|1|2|2|0|0|1|6|4|6|7|8|7|3|2|2|6|9|9	0	0	0	0	0	-14.71	0.43	0.89
TLK2-529	P08238	HSP90AB1	15|15|17|7|5|5	64	10.67	6	6|7|6|19|21|19|6|10|6|23|29|31|12|11|10|35|33|37|43|47|48|25|21|23|20|8|5|8|22|24|15|18|12|16|10|10|11|11|8|17|19|17|19|16|14	0	0	0	0	0	-65.66	0.58	0.89
TLK2-529	P08243	ASNS	2|4|4|1|2|1	14	2.33	6	1|1|0|21|20|23|0|0|1|12|17|18|0|1|0|18|17|15|8|7|8|16|16|16|24|0|1|1|22|23|16|18|18|8|13|7|12|8|9|12|13|12|17|24|19	0	0	0	0	0	-47.47	0.2	0.89
TLK2-529	P08559	PDHA1	1|1|0|0|0|0	2	0.33	6	0|0|0|0|0|0|0|0|0|0|0|0|0|0|0|0|0|0|6|7|5|1|1|0|0|0|0|1|2|1|0|2|2|1|1|0|1|0|0|0|0|0|1|1|1	0	0	0	0	0	-5.96	0.44	0.89
TLK2-529	P08579	SNRPB2	9|5|8|3|6|4	35	5.83	6	1|1|1|6|6|6|0|0|0|6|7|6|0|1|0|3|4|4|1|1|1|3|4|4|7|0|0|0|7|8|5|6|4|1|3|3|4|5|2|3|7|4|2|4|3	0.02	0.09	0.02	0.09	0.02	-9.63	1.82	0.76
TLK2-529	P08621	SNRNP70	10|9|13|6|5|7	50	8.33	6	0|0|0|5|4|4|0|0|0|4|8|6|0|0|0|1|0|2|3|2|5|9|5|5|6|0|0|1|8|7|7|6|8|9|9|8|6|5|7|8|9|8|0|0|0	0.04	0.21	0.04	0.21	0.04	-8.9	2.14	0.72
TLK2-529	P08651	NFIC	3|3|4|2|3|2	17	2.83	6	0|0|0|0|0|0|0|0|0|0|0|0|0|0|0|0|0|0|0|0|0|0|0|0|2|0|0|0|1|0|1|0|0|2|0|0|0|0|0|0|0|0|0|0|0	0.8	0.95	0.8	0.95	0.8	0.54	21.25	0.07
TLK2-529	P08670	VIM	3|5|9|1|3|3	24	4	6	73|79|63|52|54|55|30|37|36|44|40|48|9|7|10|16|14|11|68|73|63|38|40|39|29|36|26|36|22|28|23|27|22|19|21|17|9|12|10|28|27|27|23|26|26	0	0	0	0	0	-143.51	0.12	0.89
TLK2-529	P08708	RPS17	5|3|2|3|3|2	18	3	6	1|1|0|11|8|7|2|1|0|7|6|7|5|4|2|5|5|4|5|7|5|5|4|4|4|3|1|1|4|4|4|3|3|1|0|0|0|2|0|5|5|5|6|5|5	0	0	0	0	0	-13.17	0.81	0.87
TLK2-529	P08758	ANXA5	2|1|5|0|0|1	9	1.5	6	0|0|0|8|8|11|0|0|1|8|15|16|1|1|0|20|15|20|12|13|12|14|14|16|22|0|0|0|18|20|14|14|17|8|6|2|7|5|5|16|18|16|11|9|9	0	0	0	0	0	-42.34	0.16	0.89
TLK2-529	P08865	RPSA	2|2|2|0|0|0	6	1	6	1|1|1|8|7|9|2|5|3|6|11|10|4|5|5|3|3|3|12|10|12|7|4|7|7|2|2|3|7|7|9|10|11|3|2|0|3|1|2|6|5|5|7|4|7	0	0	0	0	0	-25.1	0.19	0.89
TLK2-529	P09012	SNRPA	4|3|6|2|3|1	19	3.17	6	0|0|0|0|0|0|1|1|1|2|5|6|1|1|1|1|1|1|0|1|1|2|1|0|3|0|1|0|3|3|2|4|4|3|2|3|3|2|2|4|3|3|0|0|0	0.07	0.32	0.07	0.32	0.07	-7.09	1.98	0.68
TLK2-529	P09211	GSTP1	6|4|4|1|0|0	15	2.5	6	1|0|0|10|12|9|1|0|0|0|0|0|1|0|0|2|2|2|21|23|27|2|2|3|2|0|0|0|1|1|2|0|1|1|0|0|3|1|0|2|3|1|6|7|4	0	0	0	0	0	-15.66	0.74	0.85
TLK2-529	P09382	LGALS1	2|1|2|1|0|1	7	1.17	6	0|0|0|2|2|2|0|0|0|1|0|1|0|0|0|0|0|0|0|2|0|1|1|1|1|0|0|0|1|1|1|0|1|0|0|0|0|0|0|1|1|0|0|0|0	0.05	0.16	0.05	0.16	0.05	-4.58	2.63	0.71
TLK2-529	P09429	HMGB1	5|5|4|7|10|13	44	7.33	6	0|0|0|17|16|17|0|0|0|8|12|13|0|0|0|14|13|14|6|6|4|15|14|15|12|0|0|0|12|12|13|15|13|8|5|5|5|7|6|9|9|9|7|8|7	0	0	0	0	0	-24.35	0.95	0.88
TLK2-529	P09543	CNP	3|2|3|4|3|3	18	3	6	0|0|0|4|4|3|0|0|1|1|1|1|0|2|1|1|1|2|5|5|3|3|1|2|2|6|4|5|1|3|0|1|0|2|1|3|1|3|2|1|1|1|2|0|2	0.01	0.03	0.01	0.03	0.01	-6.35	1.65	0.8
TLK2-529	P09651	HNRNPA1	15|18|19|13|17|15	97	16.17	6	12|12|10|17|12|13|6|13|9|63|63|65|13|12|11|14|11|10|47|56|64|16|18|20|44|4|8|7|40|48|39|56|51|23|51|29|19|17|19|72|102|97|7|9|8	0	0	0	0	0	-92.65	0.54	0.89
TLK2-529	P09661	SNRPA1	57|54|53|45|43|49	301	50.17	6	6|4|6|12|18|14|0|0|0|9|16|17|2|2|1|11|9|6|2|4|4|11|9|10|13|1|1|1|15|16|14|12|11|66|58|63|41|42|48|14|10|12|13|13|10	0.11	0.31	0.11	0.31	0.11	-5.75	3.49	0.63
TLK2-529	P09874	PARP1	56|63|57|46|47|51	320	53.33	6	6|5|4|27|27|21|7|10|6|51|68|70|3|2|2|17|16|14|70|77|75|24|27|29|59|7|11|9|60|64|56|58|55|36|32|37|38|32|39|62|59|63|21|27|22	0	0	0	0	0	-54.43	1.59	0.89
TLK2-529	P09884	POLA1	49|53|47|34|33|37	253	42.17	6	6|4|7|21|21|23|0|0|0|13|19|20|2|2|1|19|21|19|4|4|6|13|17|9|25|3|1|2|22|22|21|21|20|20|16|16|14|16|16|13|12|14|12|13|14	0.37	0.91	0.37	0.91	0.37	-7.13	3.36	0.36
TLK2-529	P09936	UCHL1	3|3|3|0|0|0	9	1.5	6	0|0|1|4|4|3|1|0|0|1|1|1|2|0|0|1|0|0|9|9|10|2|0|0|0|0|0|0|2|1|1|1|1|1|2|1|2|1|1|1|0|1|2|2|2	0.01	0.03	0.01	0.03	0.01	-8.61	0.95	0.79
TLK2-529	P09972	ALDOC	2|2|2|0|0|0	6	1	6	0|0|0|4|5|5|0|0|0|1|1|1|0|0|0|1|1|1|0|2|1|1|1|0|0|0|0|0|0|0|0|0|0|3|2|1|1|2|2|1|3|2|1|1|1	0.02	0.03	0.02	0.03	0.02	-6.22	1	0.78
TLK2-529	P0CAP2	POLR2M	1|0|0|0|1|2	4	0.67	6	0|0|0|3|3|3|0|0|0|0|0|0|0|0|0|0|1|0|0|0|0|0|0|0|1|0|0|0|0|1|0|0|0|1|0|1|1|0|0|0|1|1|0|0|0	0.04	0.22	0.04	0.22	0.04	-4.39	1.76	0.73
TLK2-529	P0DMV9	HSPA1B	162|160|156|253|261|254	1246	207.67	6	36|45|40|84|95|85|68|230|236|348|686|734|60|58|53|352|373|405|60|63|60|446|410|441|927|65|48|47|739|885|630|613|617|97|154|147|184|182|190|376|407|405|53|52|47	0	0	0	0	0	#NAME?	0.76	0.89
TLK2-529	P0DN76	U2AF1L5	4|1|2|2|2|2	13	2.17	6	1|1|0|2|3|2|1|3|1|13|13|11|0|0|0|1|1|2|1|3|4|5|2|2|9|1|1|1|7|9|3|5|5|3|2|2|1|1|1|5|6|4|0|0|0	0	0	0	0	0	-12.11	0.71	0.86
TLK2-529	P0DOY3	IGLC3	1|0|1|0|0|0	2	0.33	6	0|0|0|0|1|1|0|0|0|0|0|0|0|0|0|0|0|0|0|0|0|0|0|0|0|0|0|0|0|0|0|0|0|0|0|0|0|0|0|0|0|0|0|0|0	0	0	0	0	0	-3.34	3.33	0.89
TLK2-529	P0DP25	CALM3	4|5|4|4|3|3	23	3.83	6	0|0|0|8|8|6|0|1|1|10|11|11|0|0|0|3|4|3|2|3|2|5|5|5|6|3|2|0|8|6|4|5|4|10|4|3|9|10|12|3|4|2|4|5|3	0	0	0	0	0	-13.52	0.88	0.88
TLK2-529	P0DPI2	GATD3A	3|2|1|0|0|2	8	1.33	6	0|0|0|0|0|0|0|0|0|0|0|0|0|0|0|0|0|0|2|2|2|0|0|0|1|0|0|0|1|1|1|1|0|0|0|0|0|1|2|0|0|0|3|3|3	0.1	0.32	0.1	0.32	0.1	-4.88	2.61	0.64
TLK2-529	P10071	GLI3	2|3|1|2|2|1	11	1.83	6	0|0|1|0|0|1|0|0|0|0|0|0|0|0|0|2|3|3|0|0|0|0|0|0|1|0|0|0|1|1|0|1|0|1|1|1|1|0|1|1|1|0|0|1|0	0.14	0.41	0.14	0.41	0.14	-3.17	3.75	0.58
TLK2-529	P10244	MYBL2	7|5|8|8|8|10	46	7.67	6	0|0|0|0|0|0|0|0|0|0|2|2|0|0|0|2|2|2|0|0|0|0|0|1|1|1|0|0|1|2|1|2|0|0|0|0|0|0|0|0|0|0|0|0|0	0.98	1	0.98	1	0.98	2.26	18.16	0
TLK2-529	P10412	H1-4	1|0|0|0|0|0	1	0.17	6	1|0|1|1|1|1|0|0|0|0|0|0|0|0|0|0|0|0|0|0|0|0|0|0|0|0|0|0|0|0|0|0|0|1|0|1|1|1|1|0|0|0|0|0|0	0	0	0	0	0	-3.78	0.75	0.89
TLK2-529	P10599	TXN	5|9|8|3|4|4	33	5.5	6	2|5|5|1|2|3|6|4|3|7|11|11|4|1|1|2|2|3|2|4|3|5|5|4|5|2|2|3|7|6|5|5|6|6|4|3|4|6|3|8|8|6|7|6|6	0	0	0	0	0	-14.65	1.21	0.85
TLK2-529	P10636	MAPT	2|1|1|0|1|3	8	1.33	6	0|0|0|16|13|14|0|0|0|3|9|6|1|1|1|16|13|15|0|0|0|8|9|8|8|0|0|0|10|7|10|8|8|9|8|4|8|8|10|7|5|4|2|6|6	0	0	0	0	0	-26.67	0.23	0.89
TLK2-529	P10768	ESD	1|2|1|0|0|0	4	0.67	6	0|0|0|5|4|7|0|0|0|0|0|0|0|0|0|0|0|0|1|0|1|0|0|0|0|0|0|0|0|0|0|0|0|0|2|1|1|2|1|1|0|0|5|4|2	0.01	0.09	0.01	0.09	0.01	-6.23	0.81	0.78
TLK2-529	P10809	HSPD1	15|18|17|10|13|7	80	13.33	6	1|4|4|8|7|8|6|7|8|27|41|37|15|10|8|27|24|22|16|21|19|20|21|21|30|9|11|11|25|26|33|32|30|11|14|11|10|12|5|31|37|41|17|21|17	0	0	0	0	0	-59.65	0.74	0.89
TLK2-529	P11021	HSPA5	46|54|49|44|39|42	274	45.67	6	17|19|20|51|49|47|10|18|12|47|52|46|18|17|17|44|45|44|20|23|25|36|35|39|34|16|20|22|32|36|29|34|36|30|26|31|34|29|33|40|47|44|37|44|43	0	0	0	0	0	-59.53	1.42	0.89
TLK2-529	P11142	HSPA8	153|159|158|163|189|191	1013	168.83	6	51|51|48|88|86|85|34|73|49|154|153|143|41|43|43|77|82|79|37|34|34|64|64|63|66|41|34|36|60|64|68|62|62|125|136|146|126|123|130|153|123|133|52|50|52	0	0	0	0	0	-80.17	2.16	0.89
TLK2-529	P11171	EPB41	9|6|8|5|6|4	38	6.33	6	13|12|13|25|30|25|0|0|0|10|22|23|1|2|0|28|24|33|4|1|1|17|15|13|25|2|1|2|17|26|17|19|18|20|15|16|10|12|14|15|15|14|14|18|16	0	0	0	0	0	-48.76	0.46	0.89
TLK2-529	P11387	TOP1	7|8|8|8|7|7	45	7.5	6	3|3|3|4|3|4|4|6|5|4|5|3|1|0|0|0|0|0|10|13|16|0|0|1|2|0|1|1|3|5|3|4|4|9|6|6|5|5|5|3|2|2|0|0|0	0.01	0.02	0.01	0.02	0.01	-4.95	2.19	0.79
TLK2-529	P11388	TOP2A	8|7|8|3|4|1	31	5.17	6	1|1|0|0|0|0|0|3|4|6|8|16|0|0|0|0|1|0|34|30|34|0|0|1|15|2|1|2|16|17|16|15|16|8|3|3|4|1|2|3|6|5|0|1|0	0	0	0	0	0	-24.15	0.85	0.88
TLK2-529	P11413	G6PD	1|0|0|1|0|1	3	0.5	6	1|1|1|8|7|8|2|4|1|13|19|13|2|1|2|22|22|18|4|4|4|14|13|12|18|2|3|4|22|21|17|20|18|7|4|4|2|4|5|16|18|16|11|13|10	0	0	0	0	0	-43.24	0.05	0.89
TLK2-529	P11474	ESRRA	1|1|0|0|0|0	2	0.33	6	0|0|0|0|0|0|0|0|0|2|7|4|0|0|0|0|1|0|1|0|0|1|1|1|4|0|0|0|3|4|5|5|5|0|1|0|0|0|0|1|1|1|0|0|0	0	0	0	0	0	-6.25	0.31	0.89
TLK2-529	P11498	PC	42|36|41|54|54|53	280	46.67	6	707|768|622|75|80|75|688|833|696|64|72|69|361|327|282|26|27|19|218|243|233|15|12|14|52|957|757|675|47|50|28|34|35|3|1|4|1|0|0|69|63|52|3|0|0	0	0	0	0	0	#NAME?	0.22	0.89
TLK2-529	P11586	MTHFD1	5|7|4|3|1|2	22	3.67	6	5|3|2|7|11|9|7|8|9|8|16|13|10|9|7|16|17|11|26|31|34|17|18|16|9|8|7|10|8|7|10|12|10|9|8|4|8|7|6|12|19|19|15|24|23	0	0	0	0	0	-50.71	0.3	0.89
TLK2-529	P11802	CDK4	2|1|1|6|7|6	23	3.83	6	0|0|0|3|5|2|0|0|0|7|8|11|0|0|1|4|2|2|4|5|4|2|4|3|10|2|3|1|13|11|13|14|15|1|0|0|1|0|0|10|8|8|3|2|3	0	0	0	0	0	-16.26	0.93	0.86
TLK2-529	P11940	PABPC1	5|6|6|4|7|5	33	5.5	6	9|15|11|20|23|22|3|3|3|17|24|25|2|1|2|6|4|3|19|20|21|27|21|24|16|3|2|4|15|17|15|15|13|20|18|14|14|13|15|28|23|19|13|13|13	0	0	0	0	0	-49.86	0.39	0.89
TLK2-529	P12004	PCNA	6|9|8|4|5|6	38	6.33	6	0|0|2|0|2|1|0|0|0|0|1|0|1|0|0|1|1|2|7|8|10|2|3|3|1|0|1|1|0|1|2|0|1|1|0|0|0|0|1|2|2|4|3|4|6	0.26	0.51	0.26	0.51	0.26	-2.82	3.85	0.46
TLK2-529	P12081	HARS1	1|1|0|0|0|0	2	0.33	6	0|0|0|8|8|8|0|0|0|3|6|4|0|0|0|1|3|3|5|5|7|8|5|6|6|0|0|0|4|7|4|3|5|3|7|6|1|3|3|1|1|0|4|3|2	0	0	0	0	0	-15.36	0.1	0.89
TLK2-529	P12236	SLC25A6	2|1|0|1|1|1	6	1	6	0|0|0|0|0|0|1|1|1|1|1|1|0|1|0|2|2|1|1|1|1|1|0|0|1|2|2|2|1|1|1|1|1|2|3|2|1|1|4|2|2|1|3|4|2	0	0.01	0	0.01	0	-7.38	0.82	0.83
TLK2-529	P12268	IMPDH2	3|3|2|0|0|3	11	1.83	6	0|0|0|5|4|4|0|3|1|2|2|3|1|0|0|0|0|0|14|18|15|3|2|4|5|0|1|2|4|5|3|7|4|2|2|1|0|0|0|2|2|3|2|3|2	0	0	0	0	0	-14.11	0.63	0.86
TLK2-529	P12270	TPR	28|29|29|33|35|38	192	32	6	23|30|19|2|1|2|2|7|3|0|2|1|3|3|4|2|2|1|8|6|6|2|2|2|3|2|1|2|3|4|0|0|0|4|3|1|2|0|2|1|1|0|0|0|1	0.85	0.92	0.85	0.92	0.85	1.34	8.83	0.05
TLK2-529	P12277	CKB	9|7|5|0|1|1	23	3.83	6	27|4|1|14|16|13|0|0|0|5|9|5|2|3|4|7|7|7|29|30|31|6|5|5|7|0|0|0|8|9|5|5|6|6|5|5|9|8|7|4|4|4|10|9|11	0	0	0	0	0	-35.33	0.49	0.89
TLK2-529	P12757	SKIL	1|0|1|0|0|0	2	0.33	6	0|0|0|0|0|0|0|0|0|0|0|0|0|0|0|0|0|0|0|0|0|0|0|0|0|0|0|0|0|0|0|0|0|0|0|0|0|0|0|0|0|0|0|0|0	0	0	0	0	0	-3.34	3.33	0.89
TLK2-529	P12956	XRCC6	46|44|39|35|35|36	235	39.17	6	7|6|5|9|11|15|0|3|4|30|44|42|2|4|2|8|6|5|38|36|32|21|24|22|37|4|7|8|37|39|34|41|37|26|22|17|15|15|15|37|29|31|16|16|20	0	0	0	0	0	-23.87	2.01	0.88
TLK2-529	P13010	XRCC5	38|33|31|21|25|24	172	28.67	6	2|2|3|6|7|4|1|3|1|23|39|37|3|1|0|9|7|6|29|29|27|13|17|12|29|4|3|2|30|34|36|31|30|14|10|8|4|5|5|30|28|24|6|6|6	0	0	0	0	0	-21.45	2.06	0.87
TLK2-529	P13051	UNG	7|6|10|7|11|7	48	8	6	0|0|0|7|5|8|0|0|0|3|2|5|0|0|0|8|9|11|0|0|0|5|4|5|10|0|0|0|9|11|7|9|9|6|4|6|4|5|4|3|2|4|1|2|2	0.02	0.08	0.02	0.08	0.02	-7.17	2.12	0.77
TLK2-529	P13056	NR2C1	2|3|4|2|7|4	22	3.67	6	0|0|0|0|2|0|0|0|0|0|2|1|0|0|0|4|4|5|0|0|0|0|1|0|1|0|0|0|1|1|1|1|2|0|1|2|1|1|1|1|1|0|0|1|0	0.3	0.85	0.3	0.85	0.3	-2.59	4.71	0.41
TLK2-529	P13073	COX4I1	1|1|0|0|0|0	2	0.33	6	0|0|0|0|0|0|0|0|0|0|0|0|2|2|3|0|0|0|1|0|1|2|2|1|0|0|0|0|1|0|0|0|0|0|0|0|0|0|0|1|0|0|0|0|0	0	0	0	0	0	-4.3	0.94	0.89
TLK2-529	P13489	RNH1	3|3|3|2|1|1	13	2.17	6	0|0|0|1|1|1|0|0|0|2|2|2|0|0|0|1|0|1|2|3|2|0|0|0|3|0|0|0|4|1|0|0|0|4|2|1|1|2|1|1|2|1|2|0|0	0.06	0.11	0.06	0.11	0.06	-4.77	2.27	0.69
TLK2-529	P13639	EEF2	17|16|21|12|11|13	90	15	6	3|3|3|62|76|62|6|8|4|70|89|98|11|12|8|72|77|65|40|35|43|69|64|64|73|8|7|4|75|71|66|74|68|25|25|23|16|18|19|60|56|58|27|29|35	0	0	0	0	0	-147.76	0.36	0.89
TLK2-529	P13667	PDIA4	4|4|4|1|0|1	14	2.33	6	0|0|0|6|8|6|0|0|0|0|0|0|1|1|2|0|0|0|16|12|15|0|0|0|0|0|0|0|0|0|0|0|0|2|2|2|1|3|3|0|0|0|2|5|3	0.02	0.03	0.02	0.03	0.02	-9.67	1.17	0.78
TLK2-529	P13797	PLS3	12|11|15|11|10|9	68	11.33	6	4|8|5|76|81|77|3|3|7|31|30|41|5|6|3|35|34|33|15|14|15|35|34|32|30|6|5|2|33|36|27|30|30|35|53|58|46|51|54|28|30|24|31|43|41	0	0	0	0	0	-100.75	0.39	0.89
TLK2-529	P13804	ETFA	3|2|1|0|1|1	8	1.33	6	0|0|0|5|7|6|0|0|0|0|0|1|0|0|0|0|0|0|10|9|9|1|1|2|0|0|0|0|0|0|1|1|0|2|1|3|4|3|2|0|0|0|4|5|3	0	0.02	0	0.02	0	-9.46	0.75	0.83
TLK2-529	P13861	PRKAR2A	1|0|0|0|0|0	1	0.17	6	0|0|0|6|9|9|7|8|8|48|57|56|7|8|8|37|38|41|7|7|11|29|32|27|35|12|13|9|32|33|39|33|28|6|6|7|2|4|4|25|23|21|7|8|7	0	0	0	0	0	-80.71	0.01	0.89
TLK2-529	P13984	GTF2F2	13|15|10|8|10|11	67	11.17	6	1|1|1|8|7|5|0|0|0|4|6|8|0|0|0|6|7|5|0|0|0|7|5|8|10|0|0|0|8|7|6|8|10|4|4|5|3|4|3|6|6|6|10|13|13	0.05	0.19	0.05	0.19	0.05	-7.35	2.45	0.72
TLK2-529	P13995	MTHFD2	11|6|11|6|11|9	54	9	6	0|0|0|0|0|1|0|0|0|2|4|5|0|0|0|0|0|0|1|0|1|0|0|0|4|0|0|0|2|4|3|4|4|0|0|0|0|1|1|4|2|2|0|0|0	0.75	0.92	0.75	0.92	0.75	-0.14	9	0.09
TLK2-529	P14174	MIF	1|1|1|3|1|1	8	1.33	6	0|0|0|1|1|0|1|1|1|0|0|0|6|7|6|1|1|0|1|2|1|0|0|1|0|2|1|2|0|0|0|0|0|2|2|1|4|5|4|2|1|1|2|2|2	0.01	0.03	0.01	0.03	0.01	-6.3	0.94	0.81
TLK2-529	P14314	PRKCSH	1|3|0|0|0|0	4	0.67	6	0|0|0|0|1|0|0|0|0|0|0|0|0|0|0|0|0|0|6|3|5|0|0|0|0|0|0|0|0|0|0|0|0|0|0|1|0|0|0|0|0|0|1|0|0	0.08	0.46	0.08	0.46	0.08	-4.49	1.76	0.67
TLK2-529	P14406	COX7A2	1|0|0|0|1|0	2	0.33	6	0|0|0|0|0|0|0|0|0|0|0|0|0|0|0|0|0|0|0|0|0|0|0|0|0|0|0|0|0|0|0|0|0|1|0|0|0|0|0|0|0|0|0|1|1	0	0	0	0	0	-3.34	3.33	0.89
TLK2-529	P14618	PKM	14|15|16|9|8|10	72	12	6	4|6|6|41|44|43|5|7|8|44|54|50|14|13|9|35|31|40|25|28|24|39|42|41|38|3|6|3|36|36|34|36|36|20|13|13|9|10|12|34|38|37|21|16|17	0	0	0	0	0	-85.08	0.48	0.89
TLK2-529	P14625	HSP90B1	8|6|6|0|0|2	22	3.67	6	1|0|1|5|7|7|0|1|1|0|2|1|2|2|3|1|0|1|36|37|38|4|3|3|1|1|1|1|1|3|1|3|2|3|5|1|1|2|2|5|5|5|13|19|14	0	0	0	0	0	-24.42	0.67	0.87
TLK2-529	P14678	SNRPB	5|7|8|4|3|5	32	5.33	6	3|5|2|4|7|5|1|4|4|8|9|9|4|6|3|6|9|9|6|6|6|5|6|7|5|3|3|3|7|6|5|6|6|6|6|6|6|5|6|4|6|5|4|4|4	0	0	0	0	0	-17.67	1	0.88
TLK2-529	P14859	POU2F1	2|4|1|4|6|5	22	3.67	6	0|0|0|3|2|1|0|0|0|0|0|0|0|0|0|1|2|1|0|0|0|0|0|0|1|0|0|0|2|0|0|0|0|2|1|1|2|1|1|0|0|0|0|0|0	0.57	0.97	0.57	0.97	0.57	-3	7.86	0.2
TLK2-529	P14866	HNRNPL	22|22|18|10|12|12	96	16	6	7|5|4|27|27|24|4|9|8|36|51|58|4|5|4|22|21|18|25|33|33|35|28|28|43|12|13|11|54|45|45|43|47|22|35|29|12|22|18|22|31|37|9|11|8	0	0	0	0	0	-77	0.66	0.89
TLK2-529	P14868	DARS1	1|0|0|1|2|2	6	1	6	3|4|2|2|4|5|4|5|3|1|3|2|0|0|0|0|1|0|9|12|11|4|7|6|6|5|6|7|3|4|4|3|4|6|5|4|5|4|5|8|8|8|7|7|8	0	0	0	0	0	-21.56	0.22	0.89
TLK2-529	P15170	GSPT1	2|2|0|0|1|0	5	0.83	6	0|0|0|9|8|9|0|0|0|6|4|6|1|1|1|7|8|7|1|1|3|4|3|4|4|0|0|0|4|5|2|4|3|2|1|5|1|3|0|6|4|4|5|6|5	0	0	0	0	0	-15.79	0.26	0.89
TLK2-529	P15311	EZR	2|3|4|4|3|3	19	3.17	6	0|2|1|27|24|24|0|0|0|11|12|17|0|0|0|11|12|11|3|8|4|14|13|11|15|0|0|1|14|18|15|18|15|6|10|10|5|7|6|4|9|11|10|13|14	0	0	0	0	0	-34.16	0.35	0.89
TLK2-529	P15531	NME1	2|3|3|3|3|5	19	3.17	6	2|2|2|19|21|20|1|2|1|3|4|5|0|1|1|3|3|4|4|3|3|5|5|4|5|4|2|1|5|5|7|6|4|5|4|6|2|8|9|4|4|6|7|9|8	0	0	0	0	0	-18.06	0.62	0.89
TLK2-529	P15822	HIVEP1	1|1|0|0|2|2	6	1	6	0|0|0|0|0|0|0|0|0|0|0|0|0|0|0|0|0|0|0|0|0|0|0|0|0|0|0|0|0|0|0|0|0|0|0|0|0|0|1|0|0|0|0|0|0	0.26	0.77	0.26	0.77	0.26	-3.34	10	0.45
TLK2-529	P15880	RPS2	5|4|4|0|1|1	15	2.5	6	7|8|8|18|18|17|9|10|11|12|15|15|11|10|9|13|14|14|19|21|19|11|9|8|11|4|7|7|14|12|9|10|10|8|5|3|1|1|1|6|6|8|7|7|7	0	0	0	0	0	-45.47	0.25	0.89
TLK2-529	P15924	DSP	4|3|5|6|7|10	35	5.83	6	14|14|12|130|137|142|8|15|10|19|28|28|16|13|13|21|21|23|15|23|16|19|13|10|33|13|14|18|28|30|26|28|25|8|6|9|11|10|10|28|29|26|28|27|26	0	0	0	0	0	-105.7	0.22	0.89
TLK2-529	P15927	RPA2	6|6|6|5|7|7	37	6.17	6	0|0|0|0|2|2|0|0|0|6|14|11|0|0|0|8|7|8|0|2|2|7|7|5|10|0|0|0|10|11|7|7|6|2|1|5|3|3|5|5|5|4|1|4|5	0	0	0	0	0	-8.79	1.59	0.85
TLK2-529	P16104	H2AX	10|9|8|3|2|2	34	5.67	6	0|0|0|0|0|0|0|0|0|2|4|4|0|0|0|0|0|0|1|1|2|0|0|0|2|0|0|0|3|2|2|3|2|0|0|0|0|0|0|3|3|4|0|0|0	0.5	0.95	0.5	0.95	0.5	-2.7	6.71	0.25
TLK2-529	P16220	CREB1	2|1|0|2|3|3	11	1.83	6	0|0|0|1|0|1|0|0|0|0|0|0|0|0|0|0|0|0|0|0|0|0|0|0|0|0|0|0|0|0|0|0|0|2|1|2|3|2|3|0|0|0|0|0|0	0.25	0.49	0.25	0.49	0.25	-4.24	5.5	0.46
TLK2-529	P16333	NCK1	5|1|5|3|4|4	22	3.67	6	2|1|2|17|18|18|0|0|0|2|6|4|0|0|0|8|9|8|1|1|1|3|6|4|8|0|0|0|7|8|5|7|5|10|12|5|5|5|6|3|2|5|7|13|9	0	0	0	0	0	-20.75	0.71	0.89
TLK2-529	P16383	GCFC2	4|3|4|4|2|2	19	3.17	6	0|0|0|7|3|5|0|0|0|8|13|11|1|0|0|21|21|19|0|2|3|11|8|7|9|1|1|0|12|11|10|10|10|4|2|3|0|0|0|7|7|6|1|2|1	0	0	0	0	0	-18.59	0.6	0.89
TLK2-529	P16402	H1-3	7|7|7|2|4|3	30	5	6	8|8|12|9|10|9|12|15|12|7|6|5|4|5|3|2|1|1|12|12|14|11|11|12|5|4|5|5|5|7|4|4|3|9|9|16|8|14|14|9|11|15|2|4|2	0	0	0	0	0	-30.02	0.63	0.89
TLK2-529	P16403	H1-2	1|0|0|2|2|1	6	1	6	0|0|0|0|0|0|0|0|0|0|0|0|0|0|0|0|0|0|0|0|0|0|0|0|0|0|0|0|0|0|0|0|0|1|0|1|2|2|3|0|0|0|0|0|0	0.13	0.4	0.13	0.4	0.13	-3.74	5	0.58
TLK2-529	P16615	ATP2A2	11|7|9|12|12|11	62	10.33	6	3|2|2|6|7|5|2|2|1|7|8|7|5|3|1|5|4|6|21|17|18|13|11|11|12|8|5|6|14|12|10|10|10|9|9|7|6|12|11|9|8|8|7|12|13	0	0	0	0	0	-20.98	1.27	0.88
TLK2-529	P16949	STMN1	7|7|7|4|3|3	31	5.17	6	2|1|0|18|19|18|0|1|2|13|18|16|1|0|2|15|16|16|0|0|0|5|4|3|5|0|0|1|4|4|5|7|5|9|11|12|12|14|13|15|10|16|10|11|9	0	0	0	0	0	-26.04	0.68	0.89
TLK2-529	P16989	YBX3	2|4|3|5|4|3	21	3.5	6	6|3|4|5|5|7|0|1|2|1|5|3|6|1|6|5|4|3|6|6|7|5|4|5|2|1|1|0|1|1|1|1|2|7|4|3|5|3|4|3|5|4|1|1|2	0	0	0	0	0	-11.99	1.04	0.86
TLK2-529	P17010	ZFX	1|0|0|0|1|1	3	0.5	6	0|0|0|0|0|0|0|0|0|0|0|0|0|0|0|0|0|0|0|0|0|0|0|0|0|0|0|0|0|1|0|0|0|0|0|0|0|0|0|0|0|0|0|0|0	0	0	0	0	0	-3.34	5	0.89
TLK2-529	P17066	HSPA6	6|3|2|7|7|8	33	5.5	6	4|5|4|6|9|6|5|3|4|13|55|59|3|3|4|58|10|6|2|3|2|49|50|17|31|2|1|1|61|51|108|99|76|3|3|4|1|1|2|3|8|6|1|2|2	0	0	0	0	0	-75.4	0.29	0.89
TLK2-529	P17096	HMGA1	2|3|3|0|2|3	13	2.17	6	1|1|1|5|3|6|0|1|0|2|4|6|0|0|0|0|0|0|5|4|3|3|1|3|2|0|0|0|3|4|4|4|4|5|5|4|5|4|4|3|2|3|0|0|0	0	0	0	0	0	-11.92	0.93	0.85
TLK2-529	P17480	UBTF	1|1|0|1|2|0	5	0.83	6	0|0|1|3|3|2|0|0|0|0|1|4|0|0|0|0|0|0|14|15|14|0|3|0|7|0|0|0|4|4|0|1|1|0|0|1|0|2|1|0|0|0|1|2|2	0	0	0	0	0	-9.9	0.44	0.85
TLK2-529	P17676	CEBPB	1|1|1|0|0|0	3	0.5	6	0|0|0|0|0|0|0|0|0|0|0|0|0|0|0|0|0|0|0|0|0|0|0|0|0|0|0|0|0|0|0|0|0|0|0|0|0|0|0|0|0|0|0|0|0	0	0	0	0	0	-3.34	5	0.89
TLK2-529	P17706	PTPN2	1|1|2|3|1|3	11	1.83	6	0|0|0|3|2|4|0|0|0|4|6|8|0|0|0|3|3|2|0|0|0|5|4|3|8|0|0|0|9|9|5|5|5|3|1|1|1|5|3|5|6|3|4|1|2	0	0	0	0	0	-11.14	0.67	0.86
TLK2-529	P17812	CTPS1	14|13|11|7|4|7	56	9.33	6	5|4|4|28|31|32|2|2|0|13|18|19|3|4|3|15|14|17|11|15|14|13|13|14|18|2|2|2|16|17|16|17|15|24|20|21|20|23|18|17|21|17|20|21|19	0	0	0	0	0	-50.89	0.66	0.89
TLK2-529	P17844	DDX5	28|23|27|16|18|23	135	22.5	6	4|3|4|15|26|22|10|11|10|15|22|27|1|2|1|10|12|9|37|37|42|16|15|15|20|7|14|11|17|20|17|20|14|18|16|11|18|19|16|21|24|20|7|7|7	0	0	0	0	0	-32.98	1.47	0.89
TLK2-529	P17980	PSMC3	7|5|6|7|9|6	40	6.67	6	4|2|3|15|14|15|2|4|4|11|22|25|0|0|0|15|15|14|15|14|17|20|20|18|22|4|4|4|22|23|20|19|20|7|9|7|8|9|8|21|19|17|11|10|11	0	0	0	0	0	-39.74	0.55	0.89
TLK2-529	P17987	TCP1	35|42|44|29|30|31	211	35.17	6	12|19|18|22|24|21|23|32|28|67|74|73|15|10|8|14|13|10|26|31|33|42|35|40|54|31|23|22|55|55|41|42|41|51|64|56|62|62|60|51|53|56|27|33|32	0	0	0	0	0	-90.67	0.95	0.89
TLK2-529	P18074	ERCC2	2|2|0|3|1|1	9	1.5	6	0|0|0|0|0|0|0|0|0|0|0|1|0|0|0|0|0|0|0|1|1|0|1|1|0|0|0|0|0|0|0|0|0|0|0|0|0|0|0|1|0|0|0|0|0	0.38	0.92	0.38	0.92	0.38	-3.46	11.25	0.35
TLK2-529	P18077	RPL35A	1|1|1|0|1|0	4	0.67	6	2|2|2|2|1|1|1|1|1|1|1|0|0|0|1|0|0|0|2|1|1|2|1|1|1|0|0|0|0|0|0|0|0|1|1|0|1|0|1|0|0|0|2|1|2	0	0	0	0	0	-5.7	0.88	0.89
TLK2-529	P18085	ARF4	3|2|5|1|3|2	16	2.67	6	3|5|3|1|3|3|1|1|2|2|1|2|3|2|3|1|1|1|4|4|4|4|3|3|3|3|2|3|2|2|0|2|1|3|0|3|1|3|3|3|2|2|5|4|5	0	0.01	0	0.01	0	-10.43	1.07	0.83
TLK2-529	P18124	RPL7	3|4|4|1|3|2	17	2.83	6	6|7|9|8|8|7|9|10|11|2|2|3|6|10|8|2|4|4|15|10|12|9|9|9|5|2|5|4|6|4|4|3|4|6|2|3|1|0|1|5|4|6|5|6|4	0	0	0	0	0	-23.78	0.49	0.89
TLK2-529	P18206	VCL	5|4|3|2|2|2	18	3	6	0|0|0|35|45|47|0|0|0|17|27|25|1|1|2|44|38|38|1|2|3|29|28|26|33|0|0|0|32|33|26|26|25|29|32|29|32|31|29|24|22|24|23|26|22	0	0	0	0	0	-81.93	0.15	0.89
TLK2-529	P18583	SON	7|9|7|7|5|3	38	6.33	6	2|1|1|2|1|2|0|0|0|3|4|4|4|2|3|2|1|2|2|2|4|4|2|1|6|2|2|2|6|4|3|7|5|6|5|3|3|4|4|0|2|1|0|0|0	0.14	0.51	0.14	0.51	0.14	-7.42	2.5	0.58
TLK2-529	P18615	NELFE	26|25|21|41|34|35	182	30.33	6	3|4|3|49|41|40|0|0|0|12|15|17|0|3|1|24|26|28|5|5|6|13|18|13|15|1|3|0|14|14|10|12|15|18|17|26|24|23|24|13|20|19|16|18|16	0	0	0	0	0	-22.8	2.12	0.86
TLK2-529	P18621	RPL17	4|3|3|0|1|5	16	2.67	6	5|6|3|8|7|6|4|6|4|3|5|7|8|8|8|11|11|11|16|21|20|8|7|9|3|3|5|3|5|4|5|5|3|4|4|2|2|3|4|5|5|4|8|7|8	0	0	0	0	0	-30.09	0.41	0.89
TLK2-529	P18669	PGAM1	8|10|11|3|1|0	33	5.5	6	0|1|1|35|40|30|0|0|0|32|44|50|3|5|4|26|23|23|14|12|17|36|34|35|28|2|1|1|35|32|34|34|28|11|11|11|10|9|8|20|23|22|13|19|15	0	0	0	0	0	-82.64	0.3	0.89
TLK2-529	P18754	RCC1	5|3|3|3|3|4	21	3.5	6	0|0|0|2|2|0|0|0|0|1|2|4|0|0|0|2|2|0|8|7|6|0|2|0|0|0|0|0|1|0|0|1|1|0|2|2|3|4|2|3|2|2|3|1|1	0.06	0.17	0.06	0.17	0.06	-3.44	2.39	0.69
TLK2-529	P18846	ATF1	3|4|2|3|3|3	18	3	6	0|0|0|1|1|2|0|0|0|0|0|1|0|0|0|0|0|0|0|0|0|1|0|1|1|0|0|0|0|1|0|0|0|2|0|3|2|2|1|1|2|2|0|0|0	0.36	0.67	0.36	0.67	0.36	-1.95	5.62	0.36
TLK2-529	P18847	ATF3	5|5|6|3|4|4	27	4.5	6	0|0|0|0|0|0|0|0|0|1|3|3|0|0|0|0|0|0|0|0|0|0|0|0|2|0|0|0|1|1|0|1|1|2|4|2|2|1|2|1|1|2|0|0|0	0.53	0.83	0.53	0.83	0.53	-1.28	6.75	0.22
TLK2-529	P18858	LIG1	10|10|9|9|9|12	59	9.83	6	0|0|0|4|3|3|0|0|0|1|2|4|0|0|0|9|7|8|2|2|2|5|3|2|3|0|0|0|5|6|5|6|2|5|4|2|2|4|4|3|2|3|3|3|2	0.37	0.71	0.37	0.71	0.37	-1.16	3.66	0.35
TLK2-529	P18887	XRCC1	4|6|7|3|3|3	26	4.33	6	0|0|0|3|3|5|0|0|0|1|3|3|0|0|0|2|2|2|1|1|1|2|1|2|8|0|0|0|7|7|7|6|6|6|3|3|2|1|0|1|4|4|1|3|2	0.03	0.13	0.03	0.13	0.03	-6.25	1.89	0.74
TLK2-529	P19174	PLCG1	1|0|0|0|0|0	1	0.17	6	0|0|0|1|7|5|0|0|0|0|2|3|0|0|0|2|3|3|3|1|3|2|3|2|5|0|0|0|4|2|4|4|3|4|2|0|2|1|1|2|3|5|1|2|2	0	0	0	0	0	-10.37	0.09	0.89
TLK2-529	P19338	NCL	50|50|45|27|30|33	235	39.17	6	18|24|13|26|24|26|12|17|15|66|74|79|17|18|12|20|16|18|26|36|34|30|25|29|42|10|13|10|39|45|41|36|38|43|51|62|35|43|45|70|92|85|7|11|13	0	0	0	0	0	-80.99	1.17	0.89
TLK2-529	P19387	POLR2C	4|4|3|3|2|2	18	3	6	0|0|0|1|2|2|0|0|0|3|4|3|0|0|0|1|1|0|2|1|1|2|1|2|3|1|0|0|4|2|3|2|3|0|1|1|0|0|0|4|3|3|1|0|0	0.06	0.13	0.06	0.13	0.06	-4.38	2.37	0.69
TLK2-529	P19388	POLR2E	2|3|3|2|2|2	14	2.33	6	0|2|0|0|0|1|0|1|1|2|4|4|0|0|0|0|0|0|0|1|1|1|2|1|2|0|0|1|4|1|3|2|2|2|2|2|4|3|2|2|4|3|1|1|1	0.01	0.03	0.01	0.03	0.01	-4.93	1.67	0.78
TLK2-529	P19447	ERCC3	2|4|3|4|7|7	27	4.5	6	0|0|0|0|0|0|0|0|0|3|5|7|0|0|0|3|3|3|1|0|0|2|2|2|3|1|0|0|2|4|3|3|3|0|0|0|0|0|0|3|2|2|0|0|1	0.22	0.51	0.22	0.51	0.22	-4.2	3.49	0.49
TLK2-529	P19784	CSNK2A2	7|7|5|7|9|8	43	7.17	6	1|0|0|10|8|7|0|1|2|8|12|12|0|1|0|0|0|0|4|2|4|5|6|6|14|1|3|2|11|12|14|15|14|5|3|0|2|2|1|7|9|10|0|0|1	0	0	0	0	0	-11.77	1.5	0.86
TLK2-529	P19793	RXRA	1|0|1|3|2|1	8	1.33	6	0|0|0|2|0|1|0|0|0|1|2|5|0|0|0|6|3|5|0|0|0|2|2|2|5|0|0|0|4|4|6|3|3|0|0|1|1|1|1|2|0|2|0|0|0	0.01	0.03	0.01	0.03	0.01	-8.03	0.94	0.81
TLK2-529	P20042	EIF2S2	4|3|1|6|4|5	23	3.83	6	3|4|3|7|12|14|2|3|5|4|9|8|3|2|2|2|6|5|7|7|7|5|8|3|7|3|2|3|9|6|3|5|8|6|8|5|9|6|8|7|7|8|5|3|5	0	0	0	0	0	-23.35	0.68	0.88
TLK2-529	P20226	TBP	5|4|7|3|3|3	25	4.17	6	0|0|0|1|1|2|1|1|0|0|0|0|0|0|0|0|0|0|0|0|0|0|0|0|0|0|0|0|0|0|0|0|0|1|1|1|2|1|0|2|2|2|0|0|1	0.72	1	0.72	1	0.72	0.01	9.87	0.11
TLK2-529	P20248	CCNA2	2|2|1|1|0|1	7	1.17	6	0|0|0|1|2|0|0|0|0|1|3|3|0|0|0|1|2|0|0|0|0|2|2|1|4|0|0|0|4|4|4|8|3|0|0|0|0|1|0|2|1|1|0|0|0	0.01	0.03	0.01	0.03	0.01	-6.54	1.05	0.8
TLK2-529	P20290	BTF3	36|32|28|16|15|15	142	23.67	6	2|3|2|48|29|29|9|16|9|125|181|183|10|12|6|73|75|67|7|7|5|86|89|90|115|10|9|6|111|120|113|109|106|71|59|64|33|31|42|138|122|114|19|17|14	0	0	0	0	0	-202.72	0.41	0.89
TLK2-529	P20340	RAB6A	1|1|0|0|1|0	3	0.5	6	3|3|3|3|4|4|0|0|0|0|2|2|1|2|1|0|0|0|2|2|5|3|3|3|2|0|0|0|1|2|1|1|1|2|2|1|1|1|1|2|2|1|2|1|1	0	0	0	0	0	-8.91	0.32	0.89
TLK2-529	P20585	MSH3	13|18|13|18|16|17	95	15.83	6	1|1|0|2|2|2|0|0|0|1|3|4|0|0|0|1|0|0|1|1|3|2|0|1|2|0|0|1|3|1|3|4|3|3|3|0|4|4|4|4|2|3|3|6|5	1	1	1	1	1	4.91	8.58	0
TLK2-529	P20618	PSMB1	2|1|1|0|2|2	8	1.33	6	0|0|0|2|1|2|0|0|0|1|0|0|0|0|0|0|0|0|0|1|0|1|0|0|1|0|0|0|0|0|0|1|0|0|0|2|0|0|0|1|1|0|0|0|1	0.13	0.26	0.13	0.26	0.13	-4.16	4	0.58
TLK2-529	P20700	LMNB1	5|8|6|0|1|1	21	3.5	6	4|6|2|3|4|1|1|1|0|1|0|1|7|8|9|0|0|1|22|24|24|12|12|10|0|2|1|2|0|0|0|0|0|13|15|12|4|7|10|3|2|2|12|9|11	0	0	0	0	0	-26.11	0.61	0.88
TLK2-529	P20810	CAST	12|11|8|5|6|7	49	8.17	6	1|1|1|16|22|17|0|0|0|8|17|16|4|3|2|33|39|37|0|1|0|13|16|17|17|3|1|1|21|14|14|13|13|12|6|6|11|9|10|9|7|8|10|8|5	0	0	0	0	0	-32.11	0.8	0.89
TLK2-529	P21127	CDK11B	13|13|12|12|11|9	70	11.67	6	1|0|0|7|7|7|0|1|0|3|3|4|0|0|0|3|3|1|1|1|2|7|5|7|7|0|0|0|6|7|4|4|3|4|3|2|2|3|2|2|2|2|1|6|6	0.55	0.73	0.55	0.73	0.55	-1.64	4.07	0.21
TLK2-529	P21291	CSRP1	1|1|2|1|1|1	7	1.17	6	0|0|0|9|16|12|0|0|0|8|11|6|0|0|0|10|10|12|1|0|1|5|6|7|8|1|0|0|10|10|4|7|5|4|6|6|6|6|5|5|5|5|4|4|4	0	0	0	0	0	-19.69	0.24	0.89
TLK2-529	P21333	FLNA	145|151|149|163|166|162	936	156	6	651|722|634|195|218|212|202|273|225|180|252|258|315|292|293|255|245|242|142|149|129|154|145|159|139|213|170|170|145|140|138|124|125|173|235|234|201|215|205|162|186|180|85|100|97	0	0	0	0	0	-586.21	0.7	0.89
TLK2-529	P21675	TAF1	1|0|0|1|0|0	2	0.33	6	0|0|0|0|0|0|0|1|0|0|0|0|0|0|0|0|0|0|0|0|0|0|0|0|0|0|1|1|0|0|0|0|0|0|0|0|0|0|0|0|0|0|0|0|0	0	0	0	0	0	-3.34	3.33	0.89
TLK2-529	P21796	VDAC1	6|6|4|4|4|5	29	4.83	6	2|3|3|2|4|2|3|2|3|2|2|2|5|3|3|0|1|1|7|9|9|9|4|5|2|2|3|3|2|1|1|1|0|4|1|1|2|2|1|4|2|2|14|12|11	0	0	0	0	0	-8.92	1.39	0.85
TLK2-529	P22059	OSBP	1|0|0|0|0|0	1	0.17	6	0|0|0|4|2|4|0|0|0|5|11|10|0|0|0|7|10|8|3|2|1|6|5|5|8|0|0|0|11|9|7|8|6|0|2|1|1|3|4|6|11|5|1|2|1	0	0	0	0	0	-17.82	0.04	0.89
TLK2-529	P22061	PCMT1	7|12|8|5|8|6	46	7.67	6	1|1|2|31|32|34|2|6|6|21|32|33|3|5|3|21|23|22|4|6|4|25|23|28|23|4|4|6|20|18|17|18|17|25|12|12|10|9|10|27|30|30|12|18|17	0	0	0	0	0	-54.42	0.49	0.89
TLK2-529	P22087	FBL	1|3|1|3|2|0	10	1.67	6	3|3|2|4|3|3|6|8|7|2|5|5|0|0|0|0|0|0|11|10|10|4|6|6|3|3|3|2|3|2|3|5|3|3|0|0|0|1|2|3|2|2|6|6|6	0	0	0	0	0	-16.7	0.48	0.89
TLK2-529	P22102	GART	3|1|1|2|2|1	10	1.67	6	1|0|0|9|13|16|1|3|1|30|36|30|3|3|1|24|27|27|17|23|21|21|21|27|42|3|2|4|38|38|26|25|24|7|12|3|5|3|5|24|32|33|13|14|16	0	0	0	0	0	-67.74	0.1	0.89
TLK2-529	P22234	PAICS	10|12|12|9|11|11	65	10.83	6	10|12|12|33|36|39|7|9|11|38|37|40|3|3|2|9|9|10|5|5|4|26|23|23|27|6|8|7|30|25|21|23|24|24|17|19|22|30|24|25|22|22|18|21|22	0	0	0	0	0	-57.72	0.58	0.89
TLK2-529	P22314	UBA1	22|24|19|18|17|14	114	19	6	2|1|0|32|32|34|1|2|4|35|44|44|4|3|3|47|44|49|40|38|41|42|35|35|46|3|2|4|48|44|32|31|34|18|18|21|25|23|24|30|34|32|27|32|29	0	0	0	0	0	-76	0.73	0.89
TLK2-529	P22392	NME2	4|1|1|3|5|4	18	3	6	0|0|0|10|10|10|0|0|0|2|5|4|0|0|0|5|3|5|1|1|1|2|2|2|5|0|1|1|5|6|6|5|5|1|0|0|3|3|3|2|2|2|3|4|3	0	0.01	0	0.01	0	-11.13	1.1	0.84
TLK2-529	P22626	HNRNPA2B1	18|16|19|17|14|14	98	16.33	6	11|12|11|19|16|19|4|9|7|29|32|32|6|5|7|11|10|11|42|43|37|15|15|13|16|5|6|6|14|14|19|19|17|20|21|20|31|32|31|34|31|34|7|8|8	0	0	0	0	0	-45.48	0.91	0.89
TLK2-529	P22670	RFX1	6|5|6|7|8|10	42	7	6	0|0|0|1|2|1|0|0|0|2|2|2|0|0|0|0|1|1|0|0|0|2|2|2|2|0|0|0|2|2|2|1|1|1|2|1|2|2|2|2|3|3|1|1|1	0.81	1	0.81	1	0.81	-0.11	6.43	0.07
TLK2-529	P23193	TCEA1	3|2|3|2|2|1	13	2.17	6	0|0|0|3|4|3|0|0|0|2|9|6|0|0|0|11|10|8|3|0|2|5|6|2|5|0|0|0|7|7|7|5|4|3|4|2|2|1|4|5|7|7|2|3|4	0	0	0	0	0	-13.69	0.64	0.89
TLK2-529	P23246	SFPQ	62|58|60|60|48|48	336	56	6	14|14|11|129|130|126|14|110|50|248|372|375|11|13|10|75|77|77|37|44|44|124|117|135|209|41|46|54|177|222|217|198|202|47|60|51|48|57|66|215|272|277|27|37|35	0	0	0	0	0	-336.53	0.51	0.89
TLK2-529	P23258	TUBG1	1|1|1|1|1|1	6	1	6	0|0|0|0|0|0|0|0|0|0|0|1|0|0|0|0|0|0|7|9|8|0|1|2|0|0|0|0|1|1|2|1|2|1|0|1|0|0|0|0|0|0|0|3|3	0	0	0	0	0	-4.14	1.05	0.89
TLK2-529	P23284	PPIB	3|2|3|1|2|1	12	2	6	0|0|0|4|5|3|0|0|0|0|0|0|3|3|4|0|0|0|3|4|4|2|2|3|0|0|0|0|0|0|0|0|0|1|0|0|2|2|2|0|0|0|1|1|0	0.04	0.09	0.04	0.09	0.04	-5.03	1.84	0.73
TLK2-529	P23381	WARS1	6|7|8|8|12|6	47	7.83	6	1|2|0|10|9|10|0|0|0|3|8|13|0|0|0|3|3|2|2|2|2|1|4|6|9|0|0|0|7|7|5|6|7|13|13|13|9|6|7|3|1|1|11|19|14	0	0.01	0	0.01	0	-11.67	1.52	0.84
TLK2-529	P23396	RPS3	11|11|12|8|11|10	63	10.5	6	25|26|22|40|36|35|11|16|17|16|20|19|13|16|13|13|11|13|28|27|22|23|24|23|12|9|5|8|15|14|13|14|14|14|12|10|10|8|7|15|13|13|22|19|18	0	0	0	0	0	-53.96	0.61	0.89
TLK2-529	P23511	NFYA	3|2|1|2|2|2	12	2	6	0|0|0|0|0|0|0|0|0|0|1|0|0|0|0|1|2|3|0|0|0|1|0|0|0|0|0|0|0|0|0|0|0|0|0|0|0|1|0|0|0|0|0|0|0	0.38	0.68	0.38	0.68	0.38	-1.81	10	0.35
TLK2-529	P23526	AHCY	7|10|14|6|5|3	45	7.5	6	1|0|0|15|11|15|1|0|0|4|5|4|2|0|2|2|2|3|11|12|13|8|8|10|8|1|0|2|7|8|4|8|6|8|7|7|5|5|5|5|9|8|6|12|8	0	0.01	0	0.01	0	-18.83	1.31	0.84
TLK2-529	P23528	CFL1	5|7|8|5|4|5	34	5.67	6	0|1|0|10|12|11|1|3|2|9|13|18|5|5|4|12|13|15|10|9|7|16|13|12|10|3|3|2|10|10|9|8|7|5|2|4|7|7|7|6|9|8|3|5|5	0	0	0	0	0	-23.24	0.77	0.89
TLK2-529	P23560	BDNF	1|0|0|0|0|0	1	0.17	6	0|0|0|0|0|0|0|0|0|0|0|0|0|0|0|0|0|1|0|0|0|0|0|0|0|0|0|0|0|1|0|0|0|0|0|0|0|0|0|0|0|0|0|0|0	0	0	0	0	0	-3.34	1.67	0.89
TLK2-529	P23588	EIF4B	8|10|10|7|5|5	45	7.5	6	7|6|4|67|59|64|1|1|2|36|63|55|5|5|1|58|56|58|2|5|0|31|32|30|44|3|3|1|36|37|32|39|36|36|44|55|29|28|29|22|35|28|21|25|23	0	0	0	0	0	-105.56	0.27	0.89
TLK2-529	P23769	GATA2	1|0|0|2|2|3	8	1.33	6	0|0|0|0|0|0|0|0|0|0|0|0|0|0|0|0|0|0|0|0|0|0|0|0|0|0|0|0|0|0|0|0|0|0|0|0|1|0|0|0|0|0|0|0|0	0.42	0.95	0.42	0.95	0.42	-3.34	13.33	0.31
TLK2-529	P24043	LAMA2	1|0|0|0|0|1	2	0.33	6	0|0|0|0|0|0|0|0|0|0|0|0|0|0|0|0|0|0|0|0|0|0|0|0|0|0|0|0|0|0|0|0|0|0|0|0|0|0|1|0|0|0|0|0|0	0	0	0	0	0	-3.34	3.33	0.89
TLK2-529	P24534	EEF1B2	4|4|4|3|6|4	25	4.17	6	2|2|3|7|8|8|0|1|1|6|7|9|0|0|0|15|11|13|6|10|8|12|11|9|6|0|0|0|5|4|7|4|6|8|9|11|5|9|6|6|7|6|1|2|2	0	0	0	0	0	-18.42	0.74	0.88
TLK2-529	P24666	ACP1	3|3|3|3|4|3	19	3.17	6	1|0|0|4|4|5|0|0|0|1|0|0|5|5|3|3|5|2|5|5|3|1|2|2|1|0|0|0|0|0|0|1|1|5|6|6|7|7|6|2|4|4|5|6|6	0	0	0	0	0	-7.89	1.16	0.85
TLK2-529	P24752	ACAT1	2|2|0|2|0|1	7	1.17	6	0|0|0|0|0|0|0|0|0|0|0|2|0|1|0|0|0|0|2|2|2|0|0|0|0|0|0|0|0|0|0|0|0|0|2|1|1|1|1|2|0|1|0|1|1	0.08	0.16	0.08	0.16	0.08	-4.57	2.63	0.67
TLK2-529	P24928	POLR2A	6|8|10|8|4|3	39	6.5	6	0|0|0|3|4|2|0|0|0|5|14|17|0|0|0|3|2|3|3|3|2|4|4|3|6|0|0|0|10|10|9|8|9|5|3|2|3|4|4|9|6|5|0|1|1	0.01	0.04	0.01	0.04	0.01	-11.16	1.75	0.79
TLK2-529	P24941	CDK2	6|6|6|11|10|10	49	8.17	6	0|0|0|7|5|4|0|0|0|2|2|3|0|0|0|0|0|0|3|3|3|2|2|2|4|0|0|0|3|3|1|4|2|4|2|2|3|2|3|1|0|0|4|2|3	0.53	0.92	0.53	0.92	0.53	-1.4	4.54	0.22
TLK2-529	P25205	MCM3	13|14|16|11|11|11	76	12.67	6	0|0|0|14|19|16|2|3|3|14|26|22|3|4|4|14|20|18|27|26|27|19|15|15|16|4|6|7|17|16|15|17|17|13|10|6|11|9|10|13|14|14|15|16|13	0	0	0	0	0	-31.04	1	0.89
TLK2-529	P25398	RPS12	3|3|3|4|4|3	20	3.33	6	1|3|2|2|3|3|2|3|1|3|4|6|4|2|2|5|3|3|8|10|9|3|7|8|11|2|1|4|12|8|6|5|7|14|11|6|3|4|4|5|3|7|3|3|2	0	0	0	0	0	-15.61	0.69	0.89
TLK2-529	P25440	BRD2	2|3|2|2|2|4	15	2.5	6	0|0|0|5|4|3|0|0|0|7|7|8|1|0|0|7|6|8|3|1|1|7|7|6|9|0|1|0|8|7|5|9|5|5|3|2|0|1|1|7|7|8|2|2|2	0	0	0	0	0	-12.8	0.68	0.87
TLK2-529	P25490	YY1	5|3|4|1|4|3	20	3.33	6	1|0|1|3|5|3|0|0|0|2|7|9|0|0|0|7|6|8|4|1|2|4|5|3|4|1|0|0|7|7|11|8|7|4|5|3|1|3|3|4|8|5|2|3|3	0	0	0	0	0	-14.41	0.94	0.87
TLK2-529	P25685	DNAJB1	12|13|13|11|11|12	72	12	6	1|0|2|17|20|21|3|5|6|22|34|30|3|4|4|26|25|26|2|1|0|14|14|13|20|3|1|0|19|19|18|18|14|14|13|11|12|14|11|13|16|16|11|15|11	0	0	0	0	0	-30.22	0.96	0.89
TLK2-529	P25705	ATP5F1A	8|15|10|7|9|9	58	9.67	6	10|14|14|5|5|5|8|14|13|8|7|10|11|8|10|4|3|3|21|21|23|20|18|20|7|14|14|11|8|6|9|9|7|9|8|8|8|10|7|15|16|16|19|19|20	0	0	0	0	0	-33.44	0.84	0.89
TLK2-529	P25788	PSMA3	1|0|1|0|1|1	4	0.67	6	0|0|0|0|0|0|0|0|0|1|1|1|0|0|0|1|1|2|2|4|4|2|3|2|2|0|0|0|2|2|1|3|2|0|0|0|0|1|1|1|1|1|1|1|1	0	0	0	0	0	-6.5	0.68	0.89
TLK2-529	P25789	PSMA4	1|1|2|0|0|0	4	0.67	6	2|0|2|3|3|3|0|0|0|2|1|2|0|0|0|0|1|0|1|0|0|2|3|1|3|0|0|0|0|1|0|2|1|1|1|0|1|2|2|1|1|2|2|1|1	0	0.02	0	0.02	0	-6.68	0.62	0.82
TLK2-529	P26196	DDX6	9|7|7|18|13|15	69	11.5	6	4|5|4|17|21|19|1|4|4|33|37|44|1|1|1|14|10|7|13|17|14|21|23|22|25|3|5|3|29|27|34|26|24|15|14|19|22|20|22|23|23|26|12|18|15	0	0	0	0	0	-52.94	0.7	0.89
TLK2-529	P26358	DNMT1	14|16|16|8|9|14	77	12.83	6	0|0|0|6|6|8|0|0|0|4|5|8|0|0|0|14|11|14|9|8|5|8|5|8|11|0|1|0|7|10|12|8|12|4|5|5|3|5|4|8|12|10|5|6|6	0.02	0.04	0.02	0.04	0.02	-10.77	2.28	0.77
TLK2-529	P26368	U2AF2	6|8|9|6|7|8	44	7.33	6	4|2|3|16|14|14|2|7|2|36|47|48|9|9|7|36|34|37|9|7|7|27|28|30|37|4|6|6|33|30|26|30|28|6|6|2|3|2|3|45|38|44|1|3|3	0	0	0	0	0	-59.37	0.42	0.89
TLK2-529	P26373	RPL13	3|1|2|3|3|3	15	2.5	6	8|9|5|16|16|15|6|5|6|1|2|3|5|6|8|2|1|2|7|8|9|2|2|2|4|2|2|3|4|4|1|1|3|3|2|3|3|6|3|2|3|3|5|7|6	0	0	0	0	0	-19.49	0.52	0.89
TLK2-529	P26583	HMGB2	1|0|2|1|0|0	4	0.67	6	0|0|0|5|7|6|0|0|0|2|2|3|1|1|0|2|2|2|6|5|6|4|5|6|5|0|0|0|4|5|4|5|5|3|3|2|1|2|2|4|4|4|3|4|4	0	0	0	0	0	-14.31	0.23	0.89
TLK2-529	P26599	PTBP1	16|19|20|11|13|16	95	15.83	6	1|2|0|13|14|9|1|2|1|34|48|44|4|2|1|22|18|21|20|21|21|29|28|23|29|3|3|2|31|30|28|30|23|25|41|34|18|19|14|36|36|36|9|10|7	0	0	0	0	0	-53.49	0.85	0.89
TLK2-529	P26639	TARS1	5|4|10|4|4|5	32	5.33	6	1|1|1|34|41|37|0|2|1|17|23|25|1|1|2|15|17|18|10|12|11|14|15|19|32|0|1|2|25|26|13|19|19|18|26|22|13|17|15|11|19|21|16|19|22	0	0	0	0	0	-53.88	0.36	0.89
TLK2-529	P26640	VARS1	1|3|0|2|1|2	9	1.5	6	0|0|1|14|15|10|0|2|1|12|30|31|0|2|0|22|20|18|11|11|12|23|17|17|25|1|2|1|24|30|23|19|17|13|8|3|5|10|9|21|21|15|9|6|8	0	0	0	0	0	-53.81	0.13	0.89
TLK2-529	P26641	EEF1G	11|10|9|4|5|6	45	7.5	6	5|7|9|41|45|47|5|7|8|35|44|54|6|6|4|24|24|20|34|35|32|40|36|35|36|6|8|8|36|38|32|33|32|16|35|18|14|17|12|30|32|31|12|17|18	0	0	0	0	0	-92.64	0.31	0.89
TLK2-529	P27348	YWHAQ	7|5|6|5|7|13	43	7.17	6	2|2|1|10|9|10|2|5|3|7|12|12|3|2|2|8|11|11|8|9|6|7|8|7|11|3|2|4|9|10|8|6|7|10|7|9|8|11|13|12|13|11|7|7|7	0	0	0	0	0	-21.75	0.97	0.88
TLK2-529	P27448	MARK3	1|0|0|0|2|1	4	0.67	6	0|0|0|5|8|5|0|0|0|0|0|2|0|0|0|6|6|3|4|2|3|5|3|4|4|1|0|0|3|3|2|3|4|4|2|4|4|4|3|2|0|0|1|1|1	0	0	0	0	0	-11.56	0.29	0.89
TLK2-529	P27540	ARNT	3|4|8|8|15|14	52	8.67	6	0|0|0|0|2|0|0|0|0|0|2|4|0|0|0|2|1|2|0|0|0|2|1|2|5|0|0|0|2|2|1|3|2|1|2|0|1|1|1|3|2|1|1|0|0	0.7	1	0.7	1	0.7	-2.27	8.48	0.12
TLK2-529	P27635	RPL10	2|2|2|1|2|1	10	1.67	6	8|9|9|8|5|5|4|6|4|0|3|3|7|9|7|3|3|3|15|19|19|4|6|3|3|1|3|3|2|4|2|3|3|3|1|2|0|0|1|1|2|2|4|8|6	0	0	0	0	0	-19.37	0.35	0.89
TLK2-529	P27694	RPA1	22|24|26|24|18|23	137	22.83	6	0|1|1|18|15|18|1|2|1|39|49|47|2|3|2|29|31|31|5|9|3|16|16|15|32|1|2|1|28|32|29|27|27|12|17|13|19|12|12|23|26|21|9|12|12	0	0	0	0	0	-32.21	1.43	0.89
TLK2-529	P27708	CAD	10|10|9|3|5|5	42	7	6	4|3|1|2|3|2|4|4|3|7|10|8|4|5|3|2|3|4|12|14|16|9|11|7|8|10|9|8|10|9|9|4|6|8|1|0|2|2|2|16|15|15|12|16|13	0	0	0	0	0	-23.81	1	0.88
TLK2-529	P27797	CALR	1|2|4|0|0|1	8	1.33	6	0|0|0|0|0|0|0|0|0|0|0|0|0|0|0|0|0|0|32|32|34|0|0|0|0|0|1|0|0|0|0|0|0|0|0|0|0|0|0|0|0|0|3|4|4	0	0.02	0	0.02	0	-11.17	0.55	0.83
TLK2-529	P27816	MAP4	10|10|8|6|7|6	47	7.83	6	25|29|22|38|40|39|9|12|9|28|38|39|27|21|24|47|40|40|10|11|12|28|32|35|32|9|11|12|27|28|24|26|24|34|32|38|31|36|32|30|33|30|24|30|34	0	0	0	0	0	-101.23	0.29	0.89
TLK2-529	P27824	CANX	7|6|7|4|4|5	33	5.5	6	3|2|4|11|13|11|1|4|4|8|11|10|10|10|10|11|13|13|18|19|18|12|13|12|9|8|6|4|7|8|10|9|8|7|5|4|7|9|5|9|12|10|10|10|10	0	0	0	0	0	-30.18	0.61	0.89
TLK2-529	P28066	PSMA5	1|2|0|0|0|1	4	0.67	6	0|0|0|2|2|3|0|0|0|2|0|0|0|0|0|0|0|0|1|2|2|1|2|2|0|0|0|0|0|1|1|1|2|0|0|1|0|0|0|2|0|1|1|2|1	0.01	0.07	0.01	0.07	0.01	-5.51	0.94	0.79
TLK2-529	P28070	PSMB4	2|0|0|4|3|2	11	1.83	6	0|0|0|1|2|3|0|0|0|0|0|0|0|0|0|0|0|1|0|1|1|3|1|1|3|0|0|0|1|1|1|1|1|1|1|2|1|2|1|0|0|1|0|1|1	0.16	0.61	0.16	0.61	0.16	-5.55	2.5	0.55
TLK2-529	P28340	POLD1	15|17|20|14|13|12	91	15.17	6	0|2|1|7|3|4|0|0|0|4|5|6|0|0|0|4|3|2|1|2|1|3|4|3|7|0|0|1|8|7|12|5|8|8|8|3|1|2|3|3|5|4|2|4|5	0.66	0.95	0.66	0.95	0.66	-0.69	4.52	0.14
TLK2-529	P28370	SMARCA1	7|5|2|6|9|12	41	6.83	6	0|0|0|0|0|2|0|0|0|0|3|1|0|0|0|0|0|0|0|0|1|0|0|0|2|0|0|0|2|2|4|6|1|1|1|1|4|2|1|3|3|1|0|1|0	0.59	0.98	0.59	0.98	0.59	-3	7.32	0.18
TLK2-529	P28482	MAPK1	2|0|0|0|0|0	2	0.33	6	0|0|0|1|1|2|0|0|0|3|5|3|0|0|0|5|7|6|2|3|2|5|4|4|5|0|0|0|9|8|8|8|9|1|0|0|1|1|1|9|9|6|1|1|0	0	0	0	0	0	-14.16	0.12	0.89
TLK2-529	P28715	ERCC5	3|3|2|5|3|2	18	3	6	0|0|0|0|0|0|0|0|0|1|3|2|1|0|1|2|5|2|0|0|0|0|0|0|2|0|0|0|0|1|0|2|1|0|1|3|0|0|0|2|2|1|1|1|0	0.21	0.57	0.21	0.57	0.21	-2.55	3.97	0.5
TLK2-529	P29083	GTF2E1	13|17|18|13|11|12	84	14	6	0|0|0|11|10|12|0|0|0|7|5|8|0|0|0|7|6|6|1|1|0|2|1|1|10|0|0|0|5|9|7|9|10|9|13|7|5|10|14|6|12|10|5|11|9	0.06	0.2	0.06	0.2	0.06	-6.43	2.64	0.7
TLK2-529	P29084	GTF2E2	10|21|19|16|10|10	86	14.33	6	0|1|0|15|19|16|0|0|0|7|8|8|0|0|0|8|9|9|1|1|1|11|9|6|7|0|0|0|7|8|6|7|8|4|3|4|3|2|3|4|4|5|6|10|6	0.17	0.56	0.17	0.56	0.17	-6.55	2.85	0.53
TLK2-529	P29218	IMPA1	1|0|0|0|0|0	1	0.17	6	0|1|0|4|5|4|0|0|0|1|1|1|0|1|0|1|0|0|0|0|0|4|3|2|1|0|0|0|2|5|1|1|2|2|1|2|0|1|1|2|3|2|2|1|3	0	0	0	0	0	-7.79	0.12	0.89
TLK2-529	P29353	SHC1	1|1|1|0|0|0	3	0.5	6	0|1|0|4|9|7|0|0|0|3|5|4|0|0|0|7|8|7|0|0|0|4|5|5|6|0|0|0|9|8|5|6|7|5|7|5|5|11|9|4|4|3|6|8|7	0	0	0	0	0	-19.27	0.12	0.89
TLK2-529	P29372	MPG	1|1|1|1|0|1	5	0.83	6	1|0|0|4|4|3|0|0|0|3|6|7|0|0|1|4|4|3|2|0|1|4|4|4|9|0|1|1|8|8|6|4|5|5|1|2|2|1|1|4|3|5|0|0|0	0	0	0	0	0	-13.39	0.31	0.89
TLK2-529	P29375	KDM5A	1|1|0|3|0|2	7	1.17	6	0|0|0|0|0|0|0|0|0|0|0|0|0|0|0|0|0|0|0|0|0|0|0|0|0|0|0|0|0|0|0|0|0|0|0|0|0|0|0|0|0|0|0|0|0	0.29	0.95	0.29	0.95	0.29	-3.34	11.67	0.42
TLK2-529	P29401	TKT	3|4|3|3|3|4	20	3.33	6	0|0|0|11|14|9|0|0|0|2|3|2|0|0|0|9|6|10|11|12|15|3|6|5|5|0|0|1|5|6|5|7|6|6|2|4|4|4|5|5|6|6|4|6|10	0	0	0	0	0	-15.15	0.7	0.89
TLK2-529	P29590	PML	6|6|4|5|2|2	25	4.17	6	0|0|0|1|1|0|0|0|0|0|0|0|0|0|0|1|0|1|0|0|0|0|1|1|2|0|0|0|1|2|2|1|0|1|2|2|2|3|2|1|0|0|1|1|1	0.63	0.99	0.63	0.99	0.63	-2.44	6.25	0.17
TLK2-529	P29692	EEF1D	4|4|4|4|3|3	22	3.67	6	4|4|1|23|20|23|1|3|1|7|9|10|2|3|1|9|9|7|10|13|14|18|16|19|13|1|6|7|19|17|15|14|14|13|15|13|8|8|9|10|13|10|5|6|6	0	0	0	0	0	-35.89	0.37	0.89
TLK2-529	P29966	MARCKS	4|5|4|2|4|2	21	3.5	6	3|2|2|21|19|19|0|0|0|3|3|3|4|4|4|6|8|9|5|4|5|4|5|3|7|0|1|1|2|5|4|3|2|7|10|11|7|9|10|1|5|4|2|5|6	0	0	0	0	0	-18.88	0.66	0.89
TLK2-529	P30041	PRDX6	7|7|7|5|5|4	35	5.83	6	3|2|1|17|20|19|2|8|5|23|27|30|8|6|7|26|23|23|10|11|13|28|19|25|24|9|10|9|20|22|23|22|21|10|12|13|9|16|9|33|26|26|15|12|14	0	0	0	0	0	-57.58	0.37	0.89
TLK2-529	P30043	BLVRB	1|0|0|0|0|0	1	0.17	6	0|0|0|0|0|0|0|0|0|0|0|0|0|0|0|0|0|0|2|4|4|0|0|0|0|0|0|0|0|0|0|0|0|0|0|0|0|0|0|0|0|0|0|0|0	0	0	0	0	0	-3.86	0.75	0.89
TLK2-529	P30044	PRDX5	1|1|1|0|2|2	7	1.17	6	0|0|1|3|3|3|0|0|1|2|3|2|2|1|2|1|1|1|5|6|7|2|4|4|6|2|3|2|3|5|4|3|4|1|0|1|1|1|1|1|1|2|1|1|1	0	0	0	0	0	-11.32	0.54	0.89
TLK2-529	P30046	DDT	1|0|0|1|0|0	2	0.33	6	0|0|0|2|2|2|0|0|0|1|2|3|0|0|0|0|0|0|4|5|6|2|1|2|2|0|0|0|1|1|1|1|1|2|0|1|0|0|0|1|1|2|0|0|1	0	0	0	0	0	-6.39	0.32	0.89
TLK2-529	P30048	PRDX3	1|1|1|0|0|0	3	0.5	6	0|0|0|0|0|1|1|2|2|3|3|4|2|1|2|1|2|2|2|2|2|3|2|3|4|1|0|2|4|4|3|2|3|1|0|0|0|0|0|3|2|3|2|2|2	0	0	0	0	0	-9.57	0.29	0.89
TLK2-529	P30050	RPL12	3|3|1|1|2|2	12	2	6	5|5|3|4|6|6|5|7|8|4|4|3|10|10|8|7|6|5|9|12|11|3|5|2|4|2|2|3|3|4|1|3|2|2|2|1|4|4|1|2|2|2|3|3|3	0	0	0	0	0	-18.28	0.45	0.89
TLK2-529	P30086	PEBP1	1|2|2|2|1|2	10	1.67	6	0|0|0|20|18|24|0|2|2|14|17|16|4|3|3|16|19|20|4|2|2|20|17|19|16|1|1|1|14|15|16|17|15|4|5|5|7|5|5|21|23|23|9|8|9	0	0	0	0	0	-42.48	0.16	0.89
TLK2-529	P30101	PDIA3	4|3|6|0|0|0	13	2.17	6	0|0|0|11|10|10|0|0|0|0|0|0|0|0|0|0|0|1|20|16|18|0|0|0|0|0|0|0|0|0|0|0|0|3|3|2|1|1|1|0|0|0|3|3|4	0.01	0.07	0.01	0.07	0.01	-11.31	0.91	0.78
TLK2-529	P30153	PPP2R1A	21|14|11|10|18|17	91	15.17	6	0|0|0|6|4|4|0|1|1|14|18|18|1|1|0|2|2|1|10|16|13|8|9|7|16|3|2|1|13|18|15|14|18|10|9|11|8|9|6|14|19|20|10|12|15	0	0	0	0	0	-17.39	1.8	0.86
TLK2-529	P30260	CDC27	3|2|5|2|3|2	17	2.83	6	2|1|2|5|4|6|1|1|1|4|5|3|0|0|0|1|0|1|1|1|1|3|1|2|3|1|1|1|3|3|3|3|1|3|2|0|2|4|3|2|2|2|1|1|1	0.01	0.07	0.01	0.07	0.01	-6.96	1.45	0.79
TLK2-529	P30291	WEE1	1|1|0|0|0|0	2	0.33	6	0|0|0|0|1|0|0|0|0|1|1|1|0|0|0|1|2|2|2|2|2|0|0|0|1|0|0|0|0|0|0|0|1|0|0|0|0|0|0|0|0|0|0|0|0	0	0	0	0	0	-4.34	0.88	0.89
TLK2-529	P30419	NMT1	7|6|6|5|4|5	33	5.5	6	0|0|0|15|16|19|0|1|2|33|45|44|2|4|1|28|26|27|4|2|2|13|14|16|13|0|0|0|15|17|14|15|16|11|9|7|9|8|4|10|13|13|10|11|13	0	0	0	0	0	-39.65	0.47	0.89
TLK2-529	P30566	ADSL	2|2|3|2|1|1	11	1.83	6	0|0|0|7|7|9|0|0|0|1|3|2|14|9|7|4|5|3|1|0|1|2|4|3|4|0|0|0|5|5|3|5|5|3|5|4|3|4|4|2|2|2|7|7|7	0	0	0	0	0	-14.27	0.52	0.89
TLK2-529	P30876	POLR2B	6|6|6|3|6|7	34	5.67	6	1|1|1|7|6|4|0|0|0|7|13|13|0|0|0|3|1|2|2|4|6|6|3|2|9|1|1|2|7|12|8|5|6|5|2|1|3|3|2|9|10|10|1|3|0	0	0	0	0	0	-12.28	1.4	0.86
TLK2-529	P31040	SDHA	3|2|1|3|6|2	17	2.83	6	0|0|0|2|1|0|0|0|0|7|12|9|0|0|0|9|7|8|2|1|1|8|9|12|11|1|0|1|9|9|12|11|10|1|2|1|4|1|2|10|14|8|3|4|4	0	0	0	0	0	-18.33	0.62	0.87
TLK2-529	P31146	CORO1A	1|1|1|0|0|0	3	0.5	6	0|0|0|0|0|1|0|0|0|0|0|0|0|0|0|0|0|0|0|0|0|0|0|0|0|0|0|0|1|0|0|0|0|0|1|1|0|1|1|0|0|1|0|1|1	0	0	0	0	0	-3.7	2.5	0.89
TLK2-529	P31153	MAT2A	2|3|4|4|3|3	19	3.17	6	2|2|1|6|7|4|0|0|0|1|3|3|1|1|0|1|1|1|4|5|5|1|1|2|2|0|1|0|1|1|1|1|1|4|2|1|1|2|1|3|3|2|4|5|5	0.01	0.01	0.01	0.01	0.01	-7.18	1.53	0.81
TLK2-529	P31350	RRM2	1|3|2|1|1|2	10	1.67	6	1|0|0|13|13|13|0|0|0|9|14|13|0|0|0|12|11|9|1|1|1|10|11|13|11|0|0|0|13|10|11|11|10|9|7|12|7|8|4|11|9|9|7|5|6	0	0	0	0	0	-27.7	0.25	0.89
TLK2-529	P31689	DNAJA1	5|4|2|6|6|7	30	5	6	1|0|0|4|2|3|1|1|1|5|8|8|2|4|2|5|8|4|8|10|8|7|8|8|8|3|1|1|8|8|7|8|10|3|2|1|3|0|2|5|4|4|3|3|3	0	0	0	0	0	-15.43	1.15	0.87
TLK2-529	P31930	UQCRC1	1|0|0|0|0|0	1	0.17	6	1|0|0|0|1|0|0|0|0|0|1|1|0|0|0|0|0|0|3|5|3|1|0|0|0|0|0|0|0|0|0|0|0|0|0|0|0|0|0|2|2|1|1|0|1	0	0	0	0	0	-4.93	0.33	0.89
TLK2-529	P31942	HNRNPH3	4|4|5|1|1|2	17	2.83	6	0|0|0|1|3|1|1|0|1|6|6|8|0|0|0|1|1|1|12|14|14|4|3|3|7|2|2|1|9|7|8|10|9|2|0|1|0|2|1|5|5|3|0|0|0	0	0	0	0	0	-13.55	0.83	0.86
TLK2-529	P31943	HNRNPH1	7|5|7|6|6|5	36	6	6	3|2|1|4|3|1|9|12|11|10|8|16|2|2|1|4|3|3|13|25|32|3|4|3|12|6|6|5|13|13|14|15|19|5|3|2|0|2|2|16|13|18|5|6|4	0	0	0	0	0	-23.02	0.76	0.89
TLK2-529	P31946	YWHAB	5|12|8|3|2|4	34	5.67	6	1|2|2|14|14|11|0|0|1|8|7|7|0|0|1|2|2|3|6|9|8|6|8|8|5|0|2|2|6|6|6|5|5|8|13|15|6|5|7|2|4|5|4|7|7	0	0	0	0	0	-19.26	1.06	0.85
TLK2-529	P31948	STIP1	8|14|13|6|8|7	56	9.33	6	1|1|1|40|42|45|2|11|4|76|88|85|20|17|17|70|70|74|9|8|7|68|66|67|42|13|16|14|53|42|51|42|42|23|14|10|10|9|8|63|60|60|11|17|15	0	0	0	0	0	-126.26	0.28	0.89
TLK2-529	P31949	S100A11	5|7|6|1|1|1	21	3.5	6	0|1|0|12|11|11|0|0|0|7|8|9|2|3|2|6|4|5|1|1|1|3|3|4|4|0|0|0|4|6|4|6|5|16|13|11|5|8|8|18|19|19|7|8|8	0	0	0	0	0	-23.65	0.6	0.88
TLK2-529	P32119	PRDX2	5|5|6|6|6|5	33	5.5	6	2|1|0|12|15|15|3|3|2|15|12|16|2|4|4|12|14|14|8|6|8|8|11|12|11|3|2|1|7|14|11|13|11|4|5|6|4|7|7|12|14|15|8|9|10	0	0	0	0	0	-24.95	0.66	0.89
TLK2-529	P32322	PYCR1	1|0|0|0|0|1	2	0.33	6	0|0|0|0|0|0|0|0|0|0|0|1|0|0|0|0|0|0|4|4|5|3|3|2|2|1|0|0|2|1|1|4|2|0|0|0|3|2|1|2|0|1|3|1|0	0	0	0	0	0	-6.48	0.31	0.89
TLK2-529	P32519	ELF1	3|4|2|3|2|2	16	2.67	6	0|0|0|0|1|1|0|0|0|0|2|2|0|0|0|2|2|2|0|0|0|0|0|0|2|0|0|0|1|0|1|2|2|1|1|2|2|1|0|0|0|0|0|2|0	0.23	0.6	0.23	0.6	0.23	-2.34	4.14	0.48
TLK2-529	P32780	GTF2H1	6|4|5|5|6|3	29	4.83	6	0|0|0|0|1|1|0|0|0|3|8|8|0|0|0|5|6|3|1|1|1|2|3|2|1|0|0|0|5|5|4|5|5|1|0|0|1|1|0|4|2|2|0|0|0	0.09	0.17	0.09	0.17	0.09	-4.46	2.69	0.65
TLK2-529	P33176	KIF5B	6|9|5|5|4|4	33	5.5	6	16|16|12|33|27|23|1|3|4|16|25|29|2|1|2|17|13|17|10|8|16|18|24|21|28|2|8|7|22|27|16|25|24|19|24|28|18|19|16|15|20|23|18|24|23	0	0	0	0	0	-62.19	0.33	0.89
TLK2-529	P33240	CSTF2	6|7|6|4|5|5	33	5.5	6	0|0|0|4|7|6|0|0|0|1|3|1|0|0|0|5|3|4|0|0|0|0|1|2|1|0|0|0|1|4|1|1|0|5|4|0|3|2|2|1|0|0|2|2|2	0.22	0.4	0.22	0.4	0.22	-2.55	3.64	0.49
TLK2-529	P33316	DUT	5|5|5|3|2|5	25	4.17	6	1|0|2|9|9|9|0|0|0|7|7|11|0|0|0|7|9|8|5|2|5|11|10|10|10|2|0|1|13|11|12|10|6|7|10|11|5|4|9|15|10|10|5|6|7	0	0	0	0	0	-23.41	0.66	0.89
TLK2-529	P33981	TTK	2|5|4|4|5|4	24	4	6	2|1|0|5|5|5|0|0|0|5|9|7|0|1|1|7|7|9|2|1|1|5|3|5|3|1|1|0|5|8|3|6|5|6|5|4|2|4|2|7|9|7|3|4|3	0	0	0	0	0	-13.28	1.07	0.87
TLK2-529	P33991	MCM4	24|20|22|18|18|21	123	20.5	6	3|3|3|21|25|21|2|2|1|17|32|37|6|5|4|26|22|23|18|16|20|31|32|29|30|2|5|2|34|31|27|26|26|9|4|6|7|7|9|25|24|24|19|17|17	0	0	0	0	0	-34.63	1.23	0.89
TLK2-529	P33992	MCM5	7|9|9|11|10|11	57	9.5	6	3|1|4|5|7|5|3|2|2|8|10|14|1|1|1|3|4|3|19|19|19|9|10|10|15|5|10|11|12|15|14|16|15|4|5|4|5|3|3|10|11|11|7|9|9	0	0	0	0	0	-20.27	1.2	0.88
TLK2-529	P33993	MCM7	14|12|17|15|15|15	88	14.67	6	5|5|3|8|9|9|1|4|5|10|19|17|4|6|5|11|7|7|39|40|39|29|29|29|17|6|8|8|14|16|23|19|21|6|4|2|2|3|4|19|23|25|12|15|14	0	0	0	0	0	-31.65	1.1	0.89
TLK2-529	P34896	SHMT1	1|0|0|1|1|1	4	0.67	6	0|0|0|5|7|5|0|0|0|0|1|2|0|0|0|1|1|1|1|2|0|1|1|0|2|0|0|0|3|2|1|1|0|4|6|5|5|4|3|0|0|0|2|4|4	0	0	0	0	0	-9.02	0.41	0.89
TLK2-529	P34897	SHMT2	5|4|4|1|2|3	19	3.17	6	0|0|0|0|0|0|0|0|0|0|0|0|1|1|2|1|1|1|14|15|13|3|1|2|0|0|0|0|0|0|0|0|0|6|3|2|3|2|2|2|3|3|2|6|8	0.01	0.05	0.01	0.05	0.01	-8.33	1.47	0.78
TLK2-529	P34931	HSPA1L	1|1|0|0|0|0	2	0.33	6	0|0|2|2|4|3|0|0|0|0|0|1|0|0|0|4|1|2|0|0|0|0|0|0|1|0|0|0|2|1|3|1|2|0|0|0|0|0|0|0|1|1|0|0|0	0	0	0	0	0	-5.57	0.48	0.89
TLK2-529	P34932	HSPA4	28|35|33|43|43|39	221	36.83	6	3|3|0|30|32|37|4|6|5|38|55|55|3|5|5|30|29|29|15|15|17|56|55|49|43|6|10|9|53|45|38|37|33|22|22|27|36|39|38|42|40|41|6|11|10	0	0	0	0	0	-53.89	1.4	0.89
TLK2-529	P35080	PFN2	1|0|1|0|1|1	4	0.67	6	1|1|0|3|3|2|1|1|2|1|2|2|2|2|2|1|1|1|2|2|1|1|1|1|1|1|1|1|1|1|1|1|1|0|1|1|1|1|1|1|1|2|1|1|1	0	0	0	0	0	-7.57	0.53	0.89
TLK2-529	P35240	NF2	1|0|0|0|0|0	1	0.17	6	0|0|0|0|3|0|0|0|0|7|7|7|0|0|0|5|5|5|0|0|0|8|7|9|14|0|0|0|12|15|12|12|12|3|2|3|1|1|1|4|5|3|1|0|0	0	0	0	0	0	-17.12	0.05	0.89
TLK2-529	P35241	RDX	1|1|2|1|2|2	9	1.5	6	0|0|1|32|35|34|0|0|0|7|12|14|1|0|0|9|12|13|1|2|1|9|12|13|19|0|0|0|16|16|14|16|12|17|19|12|11|11|11|6|10|10|10|19|18	0	0	0	0	0	-41.64	0.15	0.89
TLK2-529	P35244	RPA3	17|14|14|10|10|9	74	12.33	6	0|2|0|4|4|5|0|1|1|10|13|15|0|0|0|6|7|6|2|2|2|7|7|7|11|0|1|1|12|13|10|9|9|12|4|1|3|3|3|7|7|6|4|4|5	0.05	0.22	0.05	0.22	0.05	-7.64	2.46	0.71
TLK2-529	P35249	RFC4	16|14|14|7|7|6	64	10.67	6	0|0|1|12|10|11|0|0|0|7|9|9|0|0|0|10|9|10|2|3|2|6|5|3|6|0|0|0|6|7|5|7|5|6|5|7|4|3|2|7|5|6|6|7|6	0.09	0.3	0.09	0.3	0.09	-10.17	2.3	0.66
TLK2-529	P35250	RFC2	5|4|4|6|6|6	31	5.17	6	0|0|0|0|0|1|0|0|0|1|3|2|0|0|0|1|1|1|4|2|3|0|0|0|1|0|0|0|0|0|1|0|0|2|3|4|3|4|2|3|4|1|3|3|2	0.33	0.47	0.33	0.47	0.33	-1.79	4.23	0.38
TLK2-529	P35251	RFC1	14|16|13|11|16|17	87	14.5	6	0|0|0|2|0|2|0|0|0|4|3|5|0|0|0|0|1|1|3|3|3|0|1|0|10|1|1|1|8|8|8|8|8|8|6|4|3|5|6|4|3|4|1|3|2	0.66	0.84	0.66	0.84	0.66	-0.67	5.02	0.14
TLK2-529	P35268	RPL22	2|2|2|1|2|2	11	1.83	6	1|1|2|2|3|2|2|3|3|4|3|2|3|3|2|2|2|0|5|5|6|2|3|1|4|1|1|1|3|3|3|2|2|2|2|3|3|3|3|1|2|1|2|2|2	0	0	0	0	0	-10.08	0.76	0.89
TLK2-529	P35269	GTF2F1	14|13|11|22|20|16	96	16	6	0|2|2|18|15|15|0|0|0|3|5|4|0|0|0|8|10|5|0|0|0|4|4|3|11|0|0|0|11|8|8|8|7|8|9|9|9|12|10|6|8|5|5|10|9	0.14	0.49	0.14	0.49	0.14	-7.18	2.87	0.57
TLK2-529	P35453	HOXD13	1|0|0|2|1|0	4	0.67	6	0|0|0|0|0|0|0|0|0|0|0|0|0|0|0|0|0|0|0|0|0|0|0|0|0|0|0|0|0|0|0|0|0|0|0|0|1|1|1|0|0|0|0|0|0	0.13	0.77	0.13	0.77	0.13	-3.34	6.67	0.59
TLK2-529	P35579	MYH9	36|36|48|37|36|33	226	37.67	6	2|2|3|9|8|10|28|60|42|91|130|122|52|50|38|65|70|73|85|99|94|32|25|27|107|60|69|68|108|116|99|103|94|88|95|92|89|100|97|116|131|137|62|88|78	0	0	0	0	0	-217.35	0.53	0.89
TLK2-529	P35580	MYH10	2|0|2|0|0|0	4	0.67	6	1|0|0|0|0|0|0|0|0|8|12|12|0|0|0|8|4|4|62|52|56|1|1|1|26|5|4|6|25|27|17|18|14|11|5|4|5|6|5|17|14|10|3|8|5	0	0	0	0	0	-45.09	0.07	0.89
TLK2-529	P35606	COPB2	2|3|3|0|2|1	11	1.83	6	0|0|1|11|13|10|0|1|0|11|11|10|0|0|0|9|6|7|5|6|7|10|10|8|11|0|0|0|11|16|11|12|12|8|10|13|7|9|7|10|7|9|6|7|5	0	0	0	0	0	-31.32	0.27	0.89
TLK2-529	P35611	ADD1	6|7|4|3|4|4	28	4.67	6	6|3|6|13|12|13|0|2|2|7|8|9|2|2|2|15|15|12|3|2|3|7|9|8|10|1|0|2|13|8|6|7|5|6|11|11|8|11|13|11|11|10|6|9|10	0	0	0	0	0	-25.22	0.64	0.89
TLK2-529	P35612	ADD2	1|0|1|0|0|0	2	0.33	6	1|0|0|5|6|5|0|0|0|2|2|1|0|0|0|9|5|8|0|0|0|5|4|4|7|0|0|0|7|7|5|5|5|4|3|5|3|4|3|4|2|4|2|3|2	0	0	0	0	0	-14.5	0.11	0.89
TLK2-529	P35613	BSG	3|3|4|3|4|3	20	3.33	6	0|0|0|1|0|0|0|0|0|0|1|2|2|1|5|1|0|1|2|1|4|4|5|4|1|0|0|0|1|1|2|2|2|4|1|1|2|2|2|1|2|1|3|5|7	0.03	0.05	0.03	0.05	0.03	-4.19	2.03	0.75
TLK2-529	P35637	FUS	6|4|5|3|9|6	33	5.5	6	2|4|5|18|14|18|0|4|2|13|19|18|6|7|5|12|17|19|17|13|12|27|25|22|22|5|5|4|24|19|30|22|22|19|12|9|24|7|4|34|26|25|3|5|6	0	0	0	0	0	-52.21	0.4	0.89
TLK2-529	P35658	NUP214	17|14|14|16|17|16	94	15.67	6	47|56|41|45|41|39|12|30|26|29|49|49|27|38|35|37|43|35|30|34|28|41|42|34|41|46|49|46|39|52|39|37|37|42|28|30|29|32|29|50|47|40|40|50|49	0	0	0	0	0	-128.16	0.41	0.89
TLK2-529	P35659	DEK	2|2|1|3|4|2	14	2.33	6	0|0|0|3|4|4|0|0|0|0|0|0|1|1|1|3|3|2|6|4|4|1|1|1|0|0|0|0|0|0|0|0|0|3|2|3|3|4|3|2|3|0|1|1|2	0.02	0.08	0.02	0.08	0.02	-6.54	1.59	0.77
TLK2-529	P35790	CHKA	1|1|0|0|0|0	2	0.33	6	0|0|0|1|1|1|0|0|0|0|0|0|0|0|0|0|0|0|0|0|0|0|0|0|0|0|0|0|2|0|0|0|0|1|1|0|0|1|0|0|0|0|1|0|2	0	0	0	0	0	-3.85	1.36	0.89
TLK2-529	P35869	AHR	1|1|1|1|1|1	6	1	6	0|0|0|0|0|0|0|0|0|1|1|1|0|0|0|1|2|1|0|0|0|1|1|0|1|0|0|0|0|1|1|0|1|0|0|0|0|0|0|0|0|0|0|0|0	0	0	0	0	0	-2.41	3.46	0.89
TLK2-529	P35908	KRT2	1|1|1|1|1|0	5	0.83	6	2|3|3|38|35|44|3|5|4|2|2|2|2|1|2|2|2|2|3|2|2|1|2|1|1|1|1|1|1|1|1|1|1|3|2|1|5|6|5|1|0|0|2|2|3	0	0	0	0	0	-20.35	0.18	0.89
TLK2-529	P35998	PSMC2	6|6|7|6|6|6	37	6.17	6	3|1|2|9|7|8|4|5|3|12|18|17|2|2|2|12|14|9|7|10|10|13|10|13|16|5|7|6|15|16|11|16|14|7|9|8|4|4|5|13|18|12|10|11|12	0	0	0	0	0	-26.48	0.67	0.89
TLK2-529	P36404	ARL2	4|3|4|3|3|3	20	3.33	6	1|0|0|10|9|9|0|0|0|12|15|14|1|0|0|5|4|6|0|3|2|4|5|5|9|0|0|0|8|9|9|8|9|6|5|6|6|8|5|7|9|5|5|4|7	0	0	0	0	0	-16.32	0.65	0.89
TLK2-529	P36405	ARL3	1|1|1|2|1|1	7	1.17	6	0|0|0|8|8|11|0|0|0|3|5|8|0|0|0|5|5|6|3|2|2|8|7|6|5|0|0|0|8|5|7|8|6|3|3|4|4|4|4|4|5|7|6|7|7	0	0	0	0	0	-16.52	0.29	0.89
TLK2-529	P36578	RPL4	4|2|3|3|2|2	16	2.67	6	9|11|7|6|8|6|11|16|13|2|4|3|5|4|7|0|0|1|18|20|21|10|11|15|4|5|5|7|3|7|3|3|4|6|5|7|1|3|2|5|7|6|7|11|11	0	0	0	0	0	-26.4	0.38	0.89
TLK2-529	P36873	PPP1CC	3|3|2|3|2|3	16	2.67	6	0|1|1|4|5|5|0|0|0|4|4|6|0|0|0|4|4|3|1|1|1|3|3|3|5|0|0|0|6|4|3|3|3|2|3|1|2|3|3|1|2|2|1|1|1	0	0	0	0	0	-7.68	1.21	0.84
TLK2-529	P36954	POLR2I	1|1|2|0|1|1	6	1	6	0|0|0|0|0|1|0|0|0|0|2|1|0|0|0|0|0|0|0|0|0|1|1|1|0|0|0|0|1|1|1|3|2|0|0|0|0|0|0|1|0|3|0|0|0	0.03	0.17	0.03	0.17	0.03	-4.53	2.37	0.75
TLK2-529	P37108	SRP14	1|3|3|3|3|3	16	2.67	6	0|0|0|2|3|1|1|3|2|3|4|4|2|1|1|0|0|0|1|2|2|1|1|2|2|2|3|2|3|2|3|2|2|1|2|1|0|0|0|3|3|4|0|0|0	0.01	0.02	0.01	0.02	0.01	-7.05	1.69	0.79
TLK2-529	P37198	NUP62	3|5|3|5|9|8	33	5.5	6	6|5|3|7|6|8|4|6|5|11|13|14|1|1|0|7|7|8|7|8|8|9|9|11|13|8|8|9|15|14|13|12|12|9|8|2|4|5|5|13|14|15|13|11|9	0	0	0	0	0	-29.49	0.66	0.89
TLK2-529	P37275	ZEB1	3|2|3|8|6|4	26	4.33	6	0|0|0|0|0|0|0|0|0|0|5|1|0|0|0|3|2|2|0|0|0|0|0|0|0|0|0|0|1|0|1|0|1|0|1|0|1|0|1|2|0|0|0|0|0	0.53	0.95	0.53	0.95	0.53	-1.57	9.29	0.23
TLK2-529	P37802	TAGLN2	35|32|24|43|40|45	219	36.5	6	14|17|14|170|204|205|5|11|14|78|81|81|8|9|10|62|63|61|8|8|7|56|53|60|112|6|7|7|118|113|61|60|72|125|102|100|119|117|115|131|125|124|90|97|109	0	0	0	0	0	-237.47	0.51	0.89
TLK2-529	P37837	TALDO1	6|5|4|2|3|4	24	4	6	0|0|0|8|10|10|0|0|1|9|14|15|0|0|0|11|9|8|0|1|1|14|13|15|15|0|0|0|13|14|12|11|12|6|6|5|3|5|4|9|10|10|7|9|9	0	0	0	0	0	-24.45	0.6	0.89
TLK2-529	P37840	SNCA	2|3|3|2|1|1	12	2	6	0|1|0|9|9|8|0|0|0|6|7|7|0|0|0|10|9|9|0|0|0|8|7|7|7|0|0|0|6|6|8|7|7|5|4|5|5|5|4|6|5|7|5|7|6	0	0	0	0	0	-18.2	0.45	0.89
TLK2-529	P38159	RBMX	4|5|6|4|3|3	25	4.17	6	4|5|5|2|2|2|4|7|10|3|6|6|4|2|4|0|0|0|9|9|10|4|3|3|4|2|6|6|4|4|3|2|2|8|6|7|3|5|5|4|6|5|0|1|1	0	0	0	0	0	-13.17	1	0.87
TLK2-529	P38398	BRCA1	3|1|2|5|7|4	22	3.67	6	0|0|0|3|1|1|0|0|0|3|7|6|1|1|1|5|5|5|0|0|1|2|3|3|5|1|0|1|4|5|3|4|5|0|0|1|1|1|1|2|1|1|1|1|0	0.06	0.27	0.06	0.27	0.06	-8.18	1.92	0.69
TLK2-529	P38432	COIL	2|1|1|4|4|3	15	2.5	6	1|0|0|7|8|8|0|0|0|5|6|6|0|0|0|3|3|4|3|2|3|5|4|1|4|0|0|0|4|4|3|4|4|0|1|3|1|1|3|3|3|3|2|3|3	0	0	0	0	0	-10.8	0.95	0.85
TLK2-529	P38606	ATP6V1A	1|1|2|0|1|3	8	1.33	6	0|0|0|18|18|18|0|0|0|7|11|10|0|0|0|3|4|5|7|6|6|8|15|12|11|0|1|0|13|13|13|13|12|10|4|3|2|2|3|8|8|6|11|11|12	0	0	0	0	0	-30.82	0.2	0.89
TLK2-529	P38646	HSPA9	39|45|44|32|33|30	223	37.17	6	29|27|31|26|28|23|15|25|25|44|60|52|36|32|36|53|54|56|17|21|22|32|31|38|31|13|14|18|34|35|31|32|33|28|30|32|22|25|24|39|40|43|23|33|33	0	0	0	0	0	-70.53	1.17	0.89
TLK2-529	P38919	EIF4A3	5|7|9|6|7|7	41	6.83	6	1|2|1|1|1|1|1|4|1|3|7|6|0|0|0|2|1|0|18|18|16|6|8|5|7|2|2|3|6|6|4|6|5|6|3|4|4|4|3|6|3|4|3|2|2	0	0.01	0	0.01	0	-9.73	1.64	0.84
TLK2-529	P38935	IGHMBP2	1|0|0|0|0|0	1	0.17	6	0|0|0|0|0|0|0|0|0|1|2|1|0|0|0|3|2|1|1|1|1|0|0|0|1|0|0|0|1|0|2|2|3|0|0|0|0|0|0|1|1|0|1|0|1	0	0	0	0	0	-5.06	0.29	0.89
TLK2-529	P39019	RPS19	2|4|4|1|0|1	12	2	6	0|0|0|2|3|1|6|9|11|6|4|3|3|3|5|1|1|0|3|3|3|2|2|1|4|4|3|4|3|4|3|3|3|5|4|5|2|3|3|5|6|6|2|1|1	0	0	0	0	0	-15.88	0.62	0.87
TLK2-529	P39023	RPL3	7|8|7|3|3|4	32	5.33	6	2|2|1|9|7|8|4|8|4|5|7|5|4|6|5|2|1|1|17|19|20|12|12|12|5|5|3|3|7|6|5|5|5|4|5|5|3|1|1|7|7|7|3|7|5	0	0	0	0	0	-19.93	0.88	0.88
TLK2-529	P39656	DDOST	2|1|3|0|2|2	10	1.67	6	0|0|0|0|0|0|0|1|1|0|0|0|0|0|1|0|0|0|9|10|10|3|5|4|0|1|2|1|0|0|0|0|0|1|1|1|0|0|0|0|1|1|6|5|4	0.01	0.04	0.01	0.04	0.01	-8.18	1.1	0.79
TLK2-529	P39687	ANP32A	1|0|1|1|1|1	5	0.83	6	0|0|0|1|1|0|0|0|0|2|2|2|0|0|0|2|1|1|2|1|2|1|1|1|1|0|0|0|3|1|1|2|4|2|2|3|1|0|0|1|1|1|0|0|0	0	0	0	0	0	-6.35	0.87	0.89
TLK2-529	P39748	FEN1	27|24|26|13|11|12	113	18.83	6	1|2|0|17|19|19|0|1|1|6|8|13|0|0|0|11|11|9|14|16|15|6|8|7|13|0|0|0|11|11|8|9|9|22|20|15|26|25|33|11|10|9|14|18|12	0	0	0	0	0	-22.14	1.84	0.85
TLK2-529	P39880	CUX1	2|3|3|4|8|9	29	4.83	6	0|0|0|0|1|0|0|0|0|1|5|3|0|0|0|1|1|1|1|0|1|1|0|1|1|0|1|1|0|1|3|2|1|2|0|1|1|2|1|1|1|1|1|0|0	0.46	1	0.46	1	0.46	-3	5.72	0.28
TLK2-529	P40227	CCT6A	24|24|27|30|41|42	188	31.33	6	7|11|9|11|13|14|15|24|19|64|75|80|7|7|5|24|24|19|15|20|16|27|32|28|44|22|20|19|48|49|52|50|42|28|34|44|21|32|33|83|68|75|25|29|26	0	0	0	0	0	-78.05	1	0.89
TLK2-529	P40429	RPL13A	1|1|1|0|1|1	5	0.83	6	4|2|2|2|3|4|2|2|2|1|2|1|3|2|2|0|0|0|2|3|3|1|2|2|0|1|1|1|1|1|1|1|1|3|1|2|0|0|1|1|1|0|2|3|3	0	0	0	0	0	-9.01	0.52	0.89
TLK2-529	P40616	ARL1	1|2|1|3|4|4	15	2.5	6	0|1|1|2|4|3|0|1|1|2|3|5|4|3|2|1|2|2|4|4|4|5|7|4|4|5|5|7|5|5|3|3|4|0|1|0|1|1|1|4|3|3|2|1|1	0	0	0	0	0	-11.49	0.91	0.86
TLK2-529	P40692	MLH1	28|31|24|21|19|20	143	23.83	6	0|1|0|3|3|2|0|0|0|4|9|10|0|1|1|6|5|5|1|1|0|3|3|2|8|1|0|0|6|6|6|8|5|5|4|4|4|2|2|3|4|3|1|3|5	0.99	1	0.99	1	0.99	3.32	7.66	0
TLK2-529	P40763	STAT3	24|24|27|25|32|30	162	27	6	1|2|1|16|16|16|0|0|0|13|16|14|0|1|0|17|16|20|2|2|2|11|11|15|20|1|1|2|21|21|17|16|15|13|8|14|9|14|11|13|16|9|12|11|16	0.02	0.06	0.02	0.06	0.02	-7.83	2.69	0.78
TLK2-529	P40855	PEX19	2|0|0|0|1|1	4	0.67	6	0|0|0|5|7|8|0|0|0|3|1|2|0|0|0|9|7|8|3|2|2|5|5|6|5|0|0|0|6|4|5|3|3|4|3|3|5|5|5|2|4|4|2|3|2	0	0	0	0	0	-15.23	0.21	0.89
TLK2-529	P40925	MDH1	2|2|3|0|0|0	7	1.17	6	0|0|0|9|8|8|0|0|0|1|2|0|0|0|0|1|2|1|2|3|3|0|3|0|4|0|0|0|2|3|2|3|2|2|3|3|0|1|1|1|0|0|0|1|0	0.01	0.02	0.01	0.02	0.01	-8.65	0.74	0.81
TLK2-529	P40926	MDH2	6|4|4|0|0|0	14	2.33	6	0|0|0|1|0|1|0|0|0|0|0|0|0|0|0|0|0|0|7|11|9|0|0|0|0|0|0|0|0|0|0|0|0|0|0|0|0|0|0|0|0|0|2|4|3	0.2	0.51	0.2	0.51	0.2	-6.45	2.76	0.52
TLK2-529	P40937	RFC5	5|6|6|3|4|6	30	5	6	0|0|0|2|0|2|0|0|0|1|1|0|0|0|0|0|0|0|1|0|1|2|1|0|1|0|0|0|1|1|2|3|3|0|1|2|2|0|0|1|1|0|0|3|2	0.7	0.92	0.7	0.92	0.7	-1.42	6.62	0.12
TLK2-529	P40938	RFC3	2|4|3|1|2|3	15	2.5	6	0|0|0|2|2|2|0|0|0|0|1|0|0|0|0|0|0|0|2|3|1|1|1|1|2|0|1|0|0|1|1|1|2|1|3|3|2|1|1|1|3|2|1|2|2	0.08	0.26	0.08	0.26	0.08	-5.05	2.45	0.66
TLK2-529	P40939	HADHA	3|3|2|0|1|1	10	1.67	6	0|0|0|0|0|0|0|0|0|0|0|0|1|0|0|0|0|0|12|9|13|3|1|2|0|0|0|0|0|0|0|0|0|3|0|2|3|2|2|0|0|0|0|1|1	0.04	0.1	0.04	0.1	0.04	-6.63	1.36	0.73
TLK2-529	P41091	EIF2S3	4|6|3|5|6|5	29	4.83	6	2|2|2|9|5|6|1|2|2|10|14|16|4|2|2|9|11|8|4|5|6|9|9|10|13|2|3|4|15|14|14|12|11|5|3|4|2|3|2|11|10|13|4|4|4	0	0	0	0	0	-22.77	0.72	0.89
TLK2-529	P41218	MNDA	1|0|0|0|0|0	1	0.17	6	0|0|0|0|0|0|0|0|0|0|0|0|0|0|0|0|0|0|0|0|0|0|0|0|0|0|0|0|0|0|0|0|0|1|0|0|0|0|0|0|0|0|0|1|0	0	0	0	0	0	-3.34	1.67	0.89
TLK2-529	P41223	BUD31	3|5|5|2|2|1	18	3	6	0|0|0|4|5|5|0|0|0|0|2|1|0|0|0|1|0|2|2|3|2|0|1|1|1|0|0|0|1|1|1|1|1|0|0|0|2|1|1|1|1|1|2|1|2	0.16	0.4	0.16	0.4	0.16	-5.03	2.87	0.56
TLK2-529	P41227	NAA10	3|2|4|3|2|3	17	2.83	6	0|0|0|6|7|6|0|0|0|0|1|2|1|0|1|3|3|4|5|5|6|2|4|3|5|0|0|0|4|5|3|5|5|1|3|5|2|3|2|1|3|2|6|3|5	0	0	0	0	0	-9.48	1.05	0.85
TLK2-529	P41229	KDM5C	2|2|2|2|1|0	9	1.5	6	0|0|0|0|0|0|0|0|0|0|0|0|0|0|0|0|0|0|0|0|0|0|0|0|0|0|0|0|0|0|0|0|0|0|0|0|0|0|0|0|0|0|0|0|0	0.51	0.77	0.51	0.77	0.51	-3.34	15	0.23
TLK2-529	P41236	PPP1R2	6|2|3|2|8|7	28	4.67	6	0|0|0|15|19|20|0|1|0|11|15|12|1|2|1|16|13|19|0|0|0|16|12|13|12|0|0|0|13|14|13|12|10|10|6|8|16|20|19|24|15|14|7|9|10	0	0	0	0	0	-35.33	0.5	0.89
TLK2-529	P41250	GARS1	1|1|1|0|0|0	3	0.5	6	0|0|0|4|5|5|0|0|0|1|5|5|0|1|1|0|2|2|5|3|4|8|6|2|5|0|0|0|6|3|2|1|1|1|1|0|0|0|0|6|3|7|3|3|3	0	0	0	0	0	-11.68	0.22	0.89
TLK2-529	P41252	IARS1	1|0|0|0|2|1	4	0.67	6	5|4|3|0|0|1|1|4|3|1|2|2|1|0|1|0|0|0|18|19|20|4|4|3|1|4|7|8|1|1|0|0|0|4|2|0|4|6|5|4|4|4|8|10|6	0	0	0	0	0	-18.22	0.17	0.89
TLK2-529	P42025	ACTR1B	1|1|0|1|0|0	3	0.5	6	0|0|0|1|1|1|0|0|0|0|0|2|0|0|0|0|0|0|0|0|0|1|1|1|1|0|0|0|1|1|1|1|1|0|0|0|0|0|0|1|1|1|1|1|1	0	0	0	0	0	-4.58	1.12	0.89
TLK2-529	P42166	TMPO	32|29|30|24|22|24	161	26.83	6	3|1|2|16|18|18|4|7|5|25|42|40|11|8|11|37|36|44|9|10|8|30|29|32|32|6|8|9|27|32|26|27|28|19|14|12|16|14|11|18|25|26|9|18|19	0	0	0	0	0	-36.18	1.43	0.89
TLK2-529	P42167	TMPO	12|11|9|7|8|8	55	9.17	6	3|2|2|25|22|22|2|2|2|13|20|24|4|5|3|25|17|21|3|5|7|15|14|14|14|3|2|3|14|16|13|12|12|27|10|20|13|15|15|13|16|16|12|13|15	0	0	0	0	0	-35.81	0.76	0.89
TLK2-529	P42224	STAT1	18|14|16|16|15|18	97	16.17	6	6|6|3|27|21|27|0|0|0|11|17|15|0|0|0|17|18|18|5|5|6|9|8|9|21|1|0|1|22|20|15|18|15|16|20|19|19|26|23|12|14|12|16|18|21	0	0	0	0	0	-25.46	1.31	0.89
TLK2-529	P42285	MTREX	48|28|27|19|22|20	164	27.33	6	9|7|8|6|5|6|0|2|2|10|23|25|0|0|0|16|12|12|9|6|8|22|19|20|23|3|4|3|22|29|20|17|18|8|6|5|8|6|6|13|12|14|5|5|4	0.15	0.9	0.15	0.9	0.15	-12.54	2.69	0.56
TLK2-529	P42566	EPS15	1|1|2|0|0|0	4	0.67	6	9|10|7|8|6|8|1|2|2|8|11|10|3|3|3|11|11|14|2|3|2|3|5|6|7|4|4|3|8|9|11|7|7|8|7|5|6|4|5|6|9|8|2|7|5	0	0	0	0	0	-28.94	0.11	0.89
TLK2-529	P42677	RPS27	2|2|2|0|2|1	9	1.5	6	3|3|2|6|6|7|1|0|1|3|2|1|1|0|2|5|4|3|5|5|5|4|5|5|2|3|3|3|2|2|3|3|3|4|1|3|0|2|3|2|2|3|2|5|4	0	0	0	0	0	-14.85	0.5	0.89
TLK2-529	P42704	LRPPRC	1|1|0|0|0|0	2	0.33	6	0|0|0|0|0|0|0|1|1|0|0|0|1|1|0|0|0|0|27|25|27|1|1|0|0|1|0|0|1|0|0|1|1|0|0|0|0|0|0|0|0|0|0|2|0	0	0	0	0	0	-9.25	0.16	0.89
TLK2-529	P42766	RPL35	2|2|2|0|0|0	6	1	6	0|0|0|1|1|0|0|0|0|1|0|0|1|1|1|0|1|0|2|2|3|1|1|1|1|1|1|1|1|1|1|1|1|2|1|1|0|1|0|2|1|1|1|1|2	0.02	0.04	0.02	0.04	0.02	-6.1	1.15	0.76
TLK2-529	P42771	CDKN2A	4|3|2|1|2|2	14	2.33	6	0|0|0|1|1|1|0|0|1|3|4|2|0|0|0|0|0|0|2|2|0|2|1|1|2|1|1|1|3|2|4|3|2|1|0|1|1|1|0|4|3|4|2|1|2	0.03	0.12	0.03	0.12	0.03	-6.18	1.75	0.74
TLK2-529	P43243	MATR3	13|16|12|12|15|16	84	14	6	2|4|2|15|13|12|1|2|2|12|17|21|3|1|1|12|13|16|12|14|14|16|15|19|18|2|5|5|20|22|15|14|15|13|12|11|9|10|9|20|23|17|8|8|9	0	0	0	0	0	-24.42	1.25	0.89
TLK2-529	P43246	MSH2	21|19|15|14|15|17	101	16.83	6	0|2|0|18|27|20|0|0|1|14|20|17|1|0|0|11|13|12|9|14|12|16|19|15|17|5|2|2|16|16|16|16|20|11|10|4|7|10|6|19|21|20|15|15|16	0	0	0	0	0	-21.58	1.5	0.88
TLK2-529	P43307	SSR1	1|2|2|1|1|2	9	1.5	6	0|0|0|2|2|2|0|0|0|2|2|1|1|1|1|2|1|1|1|1|1|1|1|1|0|0|1|2|0|1|2|1|1|0|0|0|0|0|0|0|0|0|1|1|1	0.03	0.06	0.03	0.06	0.03	-4.17	1.93	0.74
TLK2-529	P43487	RANBP1	3|1|2|1|1|1	9	1.5	6	1|2|1|14|13|16|1|2|1|12|14|16|3|3|4|14|16|14|8|7|8|10|11|11|8|1|1|2|5|8|8|6|6|3|5|7|5|4|4|9|13|11|4|6|4	0	0	0	0	0	-29.34	0.21	0.89
TLK2-529	P43490	NAMPT	2|0|0|1|0|1	4	0.67	6	0|0|0|4|3|3|1|1|0|2|3|2|3|1|1|1|1|1|10|9|4|8|5|8|4|1|0|1|3|3|3|3|2|3|3|2|0|1|0|4|4|3|4|3|3	0	0	0	0	0	-13.44	0.25	0.89
TLK2-529	P43686	PSMC4	6|6|6|3|3|3	27	4.5	6	0|1|0|5|6|4|0|0|1|9|10|13|1|1|0|1|2|3|10|10|10|9|8|4|14|2|4|3|12|13|15|13|13|4|3|2|4|4|4|10|11|10|6|6|8	0	0	0	0	0	-19.75	0.75	0.88
TLK2-529	P43897	TSFM	1|0|0|0|0|0	1	0.17	6	0|0|0|0|0|0|1|2|2|0|0|0|0|2|0|0|0|0|0|1|0|0|0|0|0|1|0|1|0|0|0|0|0|0|0|0|0|0|0|0|0|0|0|0|0	0	0	0	0	0	-3.79	0.75	0.89
TLK2-529	P45880	VDAC2	11|7|11|9|11|11	60	10	6	8|8|8|24|24|25|4|9|8|8|7|9|7|8|5|6|4|5|8|8|9|2|3|5|12|9|6|8|10|12|8|7|10|15|16|17|14|14|12|10|5|8|12|14|13	0	0	0	0	0	-27.45	1.01	0.89
TLK2-529	P45973	CBX5	5|6|6|2|5|4	28	4.67	6	0|0|0|4|3|2|0|0|0|6|10|8|0|0|0|4|3|4|10|7|9|3|6|5|11|5|2|4|11|11|9|8|11|6|2|3|1|3|3|4|6|5|0|0|0	0	0	0	0	0	-14.69	1.11	0.87
TLK2-529	P45974	USP5	3|3|3|1|2|1	13	2.17	6	0|0|0|6|6|6|0|0|0|2|7|4|0|0|0|8|7|7|7|5|8|4|4|4|8|0|0|0|8|9|6|5|3|4|3|4|3|4|3|7|8|8|2|3|4	0	0	0	0	0	-16.03	0.55	0.89
TLK2-529	P45984	MAPK9	6|5|4|2|2|2	21	3.5	6	0|0|0|4|7|5|0|0|0|0|0|0|0|0|0|0|0|0|2|1|2|0|0|0|0|0|0|0|0|1|0|0|0|3|1|2|0|1|2|0|0|0|4|6|7	0.17	0.4	0.17	0.4	0.17	-3.13	3.28	0.53
TLK2-529	P46013	MKI67	7|5|5|2|2|1	22	3.67	6	6|8|7|26|28|25|1|7|3|20|38|38|2|2|4|16|18|15|26|27|33|17|19|20|36|11|7|7|23|38|34|34|39|6|6|4|3|4|6|2|10|10|4|6|7	0	0	0	0	0	-65.73	0.23	0.89
TLK2-529	P46060	RANGAP1	13|12|10|7|6|10	58	9.67	6	16|11|10|29|28|27|6|6|7|18|28|25|2|2|3|15|15|17|10|12|12|16|16|15|23|9|5|7|26|27|19|18|18|13|21|23|16|22|21|23|23|23|23|28|23	0	0	0	0	0	-56.92	0.57	0.89
TLK2-529	P46063	RECQL	8|8|7|5|6|6	40	6.67	6	0|0|0|6|6|8|0|0|0|9|13|14|0|0|1|6|8|7|12|8|10|4|7|6|15|0|0|0|14|17|13|13|12|5|7|7|1|2|4|8|7|5|8|6|7	0	0	0	0	0	-16.7	1.09	0.88
TLK2-529	P46100	ATRX	1|2|1|1|2|3	10	1.67	6	1|0|0|0|1|1|0|0|0|0|1|0|0|0|0|1|3|2|0|0|0|0|0|0|2|0|0|0|2|3|2|3|2|3|2|0|3|2|3|3|0|0|0|1|0	0.04	0.13	0.04	0.13	0.04	-4.55	1.83	0.73
TLK2-529	P46108	CRK	19|20|22|23|17|19	120	20	6	5|7|6|17|19|18|0|0|0|2|4|4|0|0|0|7|5|8|1|1|1|2|1|3|8|0|0|0|8|7|4|6|3|11|10|8|5|7|6|3|3|4|8|9|12	0.4	0.65	0.4	0.65	0.4	-1.77	3.86	0.32
TLK2-529	P46109	CRKL	21|19|16|23|19|24	122	20.33	6	7|7|7|33|34|35|2|2|2|28|36|34|2|4|3|33|28|32|6|6|5|24|29|27|24|2|3|3|26|23|29|29|24|12|8|11|13|12|13|28|26|29|14|12|14	0	0	0	0	0	-39.95	1.17	0.89
TLK2-529	P46379	BAG6	5|1|0|2|2|3	13	2.17	6	0|0|0|0|0|1|0|0|0|0|2|5|0|0|0|0|0|0|1|0|0|0|0|2|2|0|0|0|2|2|1|2|2|1|0|1|2|2|2|1|0|0|0|0|0	0.17	0.62	0.17	0.62	0.17	-5.54	3.15	0.54
TLK2-529	P46459	NSF	2|0|1|0|0|0	3	0.5	6	0|0|0|10|9|7|0|1|0|3|3|5|0|0|0|1|2|1|7|5|7|3|5|3|3|1|1|0|2|1|1|3|4|5|4|5|0|4|4|7|7|4|4|5|7	0	0	0	0	0	-15.48	0.16	0.89
TLK2-529	P46527	CDKN1B	1|0|0|2|2|1	6	1	6	0|0|0|0|0|0|0|0|0|0|0|0|0|0|0|0|0|0|0|0|0|0|0|0|0|0|0|0|0|0|0|0|0|1|1|0|1|1|1|0|0|0|0|0|0	0.24	0.73	0.24	0.73	0.24	-3.38	9	0.47
TLK2-529	P46736	BRCC3	2|5|2|0|2|1	12	2	6	0|0|0|2|2|3|0|0|0|1|2|4|0|0|0|1|1|1|0|0|0|3|1|2|5|0|0|0|6|4|7|7|6|3|1|1|2|2|2|1|1|2|0|0|2	0.02	0.11	0.02	0.11	0.02	-9.13	1.2	0.77
TLK2-529	P46776	RPL27A	4|3|1|2|2|2	14	2.33	6	4|4|5|2|2|2|3|4|5|1|3|1|3|2|4|1|1|2|6|9|7|1|1|2|2|2|2|3|1|1|0|0|0|4|1|1|1|3|1|1|2|1|2|3|3	0	0	0	0	0	-10.11	0.96	0.85
TLK2-529	P46777	RPL5	7|6|6|3|9|8	39	6.5	6	2|1|1|13|12|14|1|3|2|2|3|5|2|2|3|3|3|2|17|15|16|19|14|18|10|2|2|3|9|8|7|7|8|8|7|5|6|4|4|4|3|3|4|3|4	0	0	0	0	0	-20.89	1.03	0.88
TLK2-529	P46778	RPL21	1|1|1|1|1|2	7	1.17	6	5|4|3|3|3|4|1|2|0|1|1|1|1|1|2|0|0|0|7|9|7|3|3|4|1|2|2|1|1|2|1|1|1|0|0|0|0|0|0|1|0|1|2|2|1	0	0	0	0	0	-8	0.62	0.86
TLK2-529	P46781	RPS9	7|6|7|2|2|5	29	4.83	6	10|10|8|10|10|13|5|11|10|5|8|8|7|8|7|2|1|2|15|12|14|6|5|4|5|5|5|4|6|5|5|5|4|8|9|11|5|8|7|5|3|5|7|11|11	0	0	0	0	0	-27.31	0.67	0.89
TLK2-529	P46782	RPS5	1|2|1|0|0|0	4	0.67	6	0|0|0|1|5|4|3|4|2|7|9|6|7|3|4|3|3|2|5|5|5|1|2|2|5|2|1|0|4|5|3|3|3|1|1|1|0|1|1|0|1|0|0|0|0	0	0	0	0	0	-12.85	0.26	0.89
TLK2-529	P46783	RPS10	2|1|1|3|3|4	14	2.33	6	2|1|1|4|5|3|4|6|4|9|11|12|4|4|4|4|4|5|12|11|10|4|4|5|8|2|2|2|8|9|6|10|9|4|7|8|2|0|1|5|4|2|4|4|4	0	0	0	0	0	-21.26	0.45	0.89
TLK2-529	P46937	YAP1	14|13|17|12|12|15	83	13.83	6	0|0|0|17|12|13|0|0|0|2|5|6|0|0|0|15|11|13|0|0|0|12|9|11|9|0|0|0|11|9|7|6|6|14|11|10|13|10|10|11|9|6|8|10|9	0	0.01	0	0.01	0	-9.02	2.11	0.83
TLK2-529	P46939	UTRN	1|0|1|0|0|0	2	0.33	6	0|0|1|0|2|0|0|0|0|0|0|0|0|0|0|0|0|0|1|1|1|0|1|0|0|0|0|0|1|0|0|0|0|1|0|0|1|3|1|0|0|0|1|0|1	0	0	0	0	0	-4.25	0.94	0.89
TLK2-529	P46977	STT3A	5|4|3|3|2|0	17	2.83	6	3|3|1|1|1|1|1|2|2|1|4|2|5|4|4|3|2|2|4|6|5|1|3|2|2|3|3|6|2|3|1|2|2|4|3|2|2|2|2|3|2|2|4|4|4	0	0.01	0	0.01	0	-13.61	1.05	0.84
TLK2-529	P47755	CAPZA2	2|2|2|4|3|3	16	2.67	6	1|1|2|5|7|7|1|2|2|5|6|6|0|0|0|1|3|1|2|1|4|5|4|5|5|2|0|1|6|4|5|5|6|7|4|14|4|5|6|7|8|8|5|6|3	0	0	0	0	0	-14.29	0.66	0.89
TLK2-529	P47756	CAPZB	6|5|4|4|5|5	29	4.83	6	2|4|4|22|21|23|3|6|3|19|23|21|2|3|2|9|5|8|5|4|8|9|11|11|17|4|4|3|15|17|10|14|12|9|10|10|9|8|6|12|15|13|9|5|8	0	0	0	0	0	-32.53	0.5	0.89
TLK2-529	P47813	EIF1AX	1|3|3|0|1|0	8	1.33	6	0|0|0|3|5|3|0|0|0|3|2|2|0|0|0|1|1|1|3|5|3|3|3|3|4|0|0|0|2|4|1|3|4|1|1|2|0|0|0|3|3|4|4|2|3	0	0.01	0	0.01	0	-9.91	0.73	0.83
TLK2-529	P47893	OR3A2	1|1|2|1|2|2	9	1.5	6	0|0|0|1|0|0|0|0|0|0|2|2|1|2|3|2|2|2|1|3|3|2|2|2|3|3|3|4|2|2|2|3|3|3|1|0|2|3|0|2|2|2|2|2|3	0	0	0	0	0	-7.53	0.88	0.84
TLK2-529	P47914	RPL29	2|1|3|0|2|2	10	1.67	6	2|2|2|3|2|2|3|3|2|1|2|3|2|1|1|1|1|1|2|1|1|2|2|1|2|1|2|2|1|2|2|1|1|2|1|2|2|2|3|2|1|1|2|1|1	0	0.01	0	0.01	0	-9.47	0.97	0.83
TLK2-529	P48382	RFX5	5|6|7|5|6|4	33	5.5	6	0|0|0|1|2|1|0|0|0|1|3|1|0|0|0|3|3|6|0|0|0|1|0|0|1|0|0|0|0|0|0|0|0|3|3|2|3|4|4|2|1|1|0|2|1	0.41	0.64	0.41	0.64	0.41	-1.47	5.05	0.32
TLK2-529	P48426	PIP4K2A	2|0|1|0|0|0	3	0.5	6	0|0|0|2|2|3|0|0|0|0|2|2|0|0|0|3|4|3|0|0|0|2|3|2|3|0|0|0|3|3|4|3|4|2|2|1|1|1|1|2|1|0|3|2|1	0	0.01	0	0.01	0	-8.33	0.35	0.84
TLK2-529	P48436	SOX9	1|0|0|1|1|1	4	0.67	6	0|0|0|0|0|0|0|0|0|0|0|0|0|0|0|0|0|0|0|0|0|0|0|0|0|0|0|0|0|0|0|0|0|0|0|0|0|0|0|0|0|0|0|0|0	0	0	0	0	0	-3.34	6.67	0.89
TLK2-529	P48444	ARCN1	5|5|5|6|4|5	30	5	6	4|3|4|43|46|47|2|2|2|13|16|19|2|3|1|17|15|13|7|9|9|12|12|12|22|3|3|4|19|20|16|20|20|17|21|23|7|13|7|8|16|14|9|14|11	0	0	0	0	0	-46.89	0.38	0.89
TLK2-529	P48507	GCLM	1|1|1|1|1|1	6	1	6	0|0|0|1|0|0|0|0|0|0|1|0|0|0|0|0|0|0|1|2|1|1|0|0|0|0|1|0|0|0|0|0|0|0|2|1|0|0|0|3|2|1|0|0|1	0	0	0	0	0	-2.77	2.5	0.89
TLK2-529	P48556	PSMD8	3|2|4|4|5|5	23	3.83	6	1|0|0|5|7|7|0|1|0|7|13|9|3|2|2|8|7|6|1|3|2|11|10|10|7|2|2|0|7|7|7|6|4|3|2|3|3|3|3|12|13|11|6|7|7	0	0	0	0	0	-18.35	0.75	0.89
TLK2-529	P48634	PRRC2A	9|13|17|12|15|16	82	13.67	6	7|14|12|38|43|41|0|1|2|25|36|39|7|5|9|53|53|56|1|2|2|17|23|21|34|4|5|6|25|29|26|28|29|22|27|22|14|17|12|15|25|18|9|16|14	0	0	0	0	0	-62.84	0.68	0.89
TLK2-529	P48643	CCT5	51|51|48|27|31|26	234	39	6	5|9|4|21|22|16|14|22|14|65|94|104|20|15|9|81|74|73|24|22|18|68|62|66|62|25|25|26|59|61|66|49|60|53|45|59|42|40|42|94|80|88|25|34|29	0	0	0	0	0	-123.32	0.88	0.89
TLK2-529	P48729	CSNK1A1	4|5|4|3|3|4	23	3.83	6	0|0|0|4|5|7|0|2|1|20|22|19|3|3|2|15|17|16|3|3|4|12|10|15|19|1|2|2|13|17|13|19|16|3|4|1|2|0|2|10|14|9|1|1|2	0	0	0	0	0	-25.11	0.52	0.89
TLK2-529	P49005	POLD2	3|3|3|3|4|5	21	3.5	6	0|0|0|1|0|1|0|0|0|1|3|4|0|0|0|0|0|0|0|2|2|0|0|1|6|0|0|0|6|6|4|4|3|1|1|1|1|0|1|2|1|1|1|1|1	0.1	0.25	0.1	0.25	0.1	-2.77	2.81	0.64
TLK2-529	P49006	MARCKSL1	3|0|1|0|0|0	4	0.67	6	0|0|0|1|1|0|0|0|0|0|1|1|2|1|1|3|2|2|0|0|1|1|1|0|0|0|0|0|0|0|0|0|0|1|1|2|0|1|1|0|1|0|0|0|0	0.07	0.4	0.07	0.4	0.07	-4.93	1.2	0.69
TLK2-529	P49023	PXN	5|3|3|1|3|2	17	2.83	6	1|0|1|12|12|15|0|0|0|9|21|25|0|0|0|20|18|22|1|1|1|11|12|9|14|0|1|1|12|13|14|11|10|9|7|7|10|9|8|7|8|9|6|7|9	0	0	0	0	0	-32.96	0.35	0.89
TLK2-529	P49116	NR2C2	1|2|3|1|1|1	9	1.5	6	0|0|0|0|0|0|0|0|0|0|0|0|0|0|0|1|1|1|0|0|0|0|1|1|0|0|0|0|1|1|0|0|0|1|0|1|1|0|1|0|0|0|0|0|0	0.18	0.74	0.18	0.74	0.18	-2.25	6.14	0.53
TLK2-529	P49137	MAPKAPK2	1|0|0|0|0|0	1	0.17	6	0|0|0|0|0|0|0|0|0|0|0|0|0|0|0|0|0|0|0|0|0|0|0|0|0|0|0|0|0|0|0|0|0|0|1|0|0|0|0|0|0|0|0|0|0	0	0	0	0	0	-3.34	1.67	0.89
TLK2-529	P49207	RPL34	1|1|1|0|0|0	3	0.5	6	1|1|1|1|1|1|1|1|2|1|1|1|2|3|1|0|0|0|2|2|2|2|1|1|0|0|0|0|0|0|0|0|0|0|1|0|0|1|1|1|1|1|2|1|0	0	0	0	0	0	-6.02	0.59	0.89
TLK2-529	P49321	NASP	94|107|116|88|95|92	592	98.67	6	20|22|21|48|52|56|6|11|7|21|43|49|19|21|15|54|50|49|21|22|23|38|31|29|42|12|13|15|44|40|36|30|29|33|35|28|33|31|31|25|30|32|23|26|29	0.22	0.94	0.22	0.94	0.22	-9.54	3.3	0.49
TLK2-529	P49327	FASN	242|219|199|158|154|154	1126	187.67	6	191|209|166|273|326|298|29|51|36|182|215|219|60|56|44|173|173|165|72|81|77|156|152|151|136|40|39|35|141|142|132|122|117|272|330|366|251|271|295|170|184|173|151|172|163	0	0	0	0	0	-346.18	1.16	0.89
TLK2-529	P49366	DHPS	2|2|1|5|5|6	21	3.5	6	0|0|0|4|3|3|0|0|0|0|3|3|0|0|0|3|4|2|0|0|0|2|3|1|3|0|0|0|5|4|4|7|7|1|0|0|1|0|0|1|1|1|4|2|2	0.08	0.23	0.08	0.23	0.08	-7.14	2.13	0.67
TLK2-529	P49368	CCT3	38|42|38|27|27|23	195	32.5	6	11|9|11|22|19|19|16|28|23|53|74|77|5|3|4|10|9|8|21|21|21|31|28|26|40|24|21|19|45|43|35|35|35|64|66|67|50|57|51|68|69|65|24|32|31	0	0	0	0	0	-86.48	0.98	0.89
TLK2-529	P49411	TUFM	12|14|11|9|7|9	62	10.33	6	12|6|9|6|7|5|8|10|9|12|16|14|12|10|11|15|14|12|24|23|26|19|16|17|23|16|19|17|24|19|23|21|24|8|4|3|2|7|5|17|22|19|11|14|12	0	0	0	0	0	-42.76	0.75	0.89
TLK2-529	P49419	ALDH7A1	1|1|1|0|0|1	4	0.67	6	0|0|0|3|5|3|0|0|0|1|1|1|0|0|0|0|0|1|0|1|1|1|2|3|1|0|0|0|0|0|0|0|2|1|2|2|1|2|2|1|2|1|2|2|2	0	0	0	0	0	-6.46	0.65	0.89
TLK2-529	P49458	SRP9	1|1|1|2|2|2	9	1.5	6	0|1|0|1|0|0|0|0|0|1|1|1|0|0|0|0|0|0|1|4|4|2|2|2|1|0|1|1|1|2|3|3|2|1|1|1|2|2|1|2|2|2|0|1|0	0.01	0.02	0.01	0.02	0.01	-5.35	1.38	0.8
TLK2-529	P49459	UBE2A	2|1|1|0|0|1	5	0.83	6	0|0|0|0|0|0|0|0|0|0|0|0|0|0|0|0|0|0|1|0|1|0|0|0|0|0|0|0|0|0|0|0|0|0|0|0|0|0|0|0|0|0|0|0|0	0.13	0.77	0.13	0.77	0.13	-3.34	8.33	0.59
TLK2-529	P49585	PCYT1A	3|5|7|6|4|6	31	5.17	6	0|0|0|3|2|1|0|0|0|0|2|2|1|0|0|4|5|6|0|0|0|3|1|1|1|0|0|0|3|2|1|1|3|2|4|2|2|3|3|3|0|1|2|2|5	0.22	0.49	0.22	0.49	0.22	-4.01	3.27	0.5
TLK2-529	P49588	AARS1	1|3|2|1|0|1	8	1.33	6	0|0|0|22|28|26|0|0|0|32|38|32|0|1|0|29|32|23|12|11|14|20|22|21|32|3|5|2|35|35|26|31|27|18|15|9|15|16|13|23|21|19|16|21|19	0	0	0	0	0	-76.05	0.08	0.89
TLK2-529	P49642	PRIM1	20|17|19|14|13|15	98	16.33	6	0|0|0|4|4|4|0|0|0|5|8|6|0|0|0|3|2|2|3|3|4|6|5|6|8|0|0|0|8|8|9|7|5|8|6|4|3|4|5|3|3|6|9|9|8	0.62	0.93	0.62	0.93	0.62	-1.18	4.13	0.17
TLK2-529	P49643	PRIM2	22|17|16|19|20|20	114	19	6	2|1|2|13|12|18|0|0|0|4|7|10|1|0|0|11|7|5|2|3|3|5|7|4|8|0|1|0|8|8|8|7|6|8|6|8|6|6|7|7|8|9|8|9|6	0.33	0.67	0.33	0.67	0.33	-2.87	3.41	0.39
TLK2-529	P49711	CTCF	1|1|2|1|6|5	16	2.67	6	0|0|0|0|0|0|0|0|0|1|1|1|0|0|0|0|0|0|2|2|1|1|2|2|7|0|0|0|5|4|1|3|2|1|1|1|0|1|0|1|0|2|0|0|0	0.16	0.52	0.16	0.52	0.16	-4.4	2.86	0.56
TLK2-529	P49720	PSMB3	1|1|1|0|0|0	3	0.5	6	0|0|0|1|1|0|0|0|0|0|0|0|0|0|0|0|0|0|0|0|0|1|0|0|1|0|0|0|1|0|0|1|1|0|0|0|0|0|0|0|0|0|0|0|0	0	0	0	0	0	-3.54	3.21	0.89
TLK2-529	P49736	MCM2	11|8|12|14|15|13	73	12.17	6	0|1|0|1|1|0|0|0|0|4|3|7|0|0|0|7|5|7|19|20|17|11|11|8|10|1|0|0|7|9|8|9|9|4|2|2|2|2|3|7|9|8|4|5|2	0.02	0.07	0.02	0.07	0.02	-8.52	2.43	0.76
TLK2-529	P49750	YLPM1	26|25|22|19|20|19	131	21.83	6	5|8|4|29|26|24|0|1|1|10|28|23|2|2|1|22|21|27|2|4|5|21|19|18|20|1|1|2|22|21|17|18|25|19|14|11|10|16|10|8|10|12|10|16|16	0	0	0	0	0	-20.9	1.69	0.88
TLK2-529	P49755	TMED10	2|1|2|0|0|1	6	1	6	0|0|0|0|0|0|0|0|0|0|0|0|1|2|2|0|0|0|2|2|3|2|1|1|0|0|0|0|0|0|0|0|0|0|0|0|0|0|0|0|0|0|3|3|1	0.05	0.15	0.05	0.15	0.05	-4.89	1.96	0.71
TLK2-529	P49756	RBM25	7|10|10|12|13|14	66	11	6	3|2|2|5|8|8|2|5|3|15|22|21|6|4|6|22|22|21|10|10|10|17|18|18|27|5|11|9|25|28|23|25|24|10|7|3|4|4|5|9|14|15|2|7|7	0	0	0	0	0	-33.85	0.94	0.89
TLK2-529	P49770	EIF2B2	1|2|2|0|1|1	7	1.17	6	0|0|0|2|2|2|0|0|0|0|1|3|0|0|0|1|2|1|0|0|0|4|4|4|4|0|0|0|1|4|1|0|1|0|1|1|2|0|1|3|3|3|3|3|3	0	0.01	0	0.01	0	-7.78	0.88	0.82
TLK2-529	P49773	HINT1	1|2|2|0|0|0	5	0.83	6	0|0|0|22|16|15|0|0|0|5|14|8|3|3|3|12|7|9|3|3|2|13|11|12|10|0|0|0|9|9|12|10|9|1|1|2|0|1|0|9|11|11|13|14|14	0	0	0	0	0	-30.07	0.13	0.89
TLK2-529	P49790	NUP153	21|18|22|14|22|22	119	19.83	6	4|5|4|19|19|19|1|3|1|20|28|29|11|12|10|35|33|33|6|7|10|22|24|22|27|6|7|6|26|23|21|23|23|17|15|14|13|14|12|14|23|20|10|17|13	0	0	0	0	0	-38.41	1.24	0.89
TLK2-529	P49792	RANBP2	19|20|23|14|11|15	102	17	6	41|39|39|33|37|36|7|19|19|48|56|64|39|37|39|41|48|46|32|28|30|41|37|37|46|28|35|34|37|39|47|44|48|24|22|21|20|22|16|26|27|30|23|26|32	0	0	0	0	0	-116.77	0.5	0.89
TLK2-529	P49840	GSK3A	1|0|0|1|2|2	6	1	6	0|0|0|5|3|5|0|0|0|2|6|4|0|0|0|9|7|5|3|1|1|5|4|5|8|0|0|0|8|9|5|5|6|4|2|1|3|2|2|4|5|6|1|3|4	0	0	0	0	0	-15.37	0.31	0.89
TLK2-529	P49841	GSK3B	1|0|1|4|5|4	15	2.5	6	0|0|0|4|5|5|0|0|0|4|5|6|1|1|1|5|5|8|1|2|1|4|5|6|3|0|0|0|5|4|6|4|5|3|2|2|5|3|3|4|4|3|2|3|3	0	0	0	0	0	-14.7	0.85	0.85
TLK2-529	P49848	TAF6	1|0|3|2|1|2	9	1.5	6	1|0|0|0|0|0|4|4|3|0|0|1|0|0|0|0|0|0|0|1|1|0|1|1|0|3|6|6|0|1|1|1|0|1|1|0|1|0|0|1|1|1|0|1|0	0.04	0.13	0.04	0.13	0.04	-6.58	1.61	0.73
TLK2-529	P49915	GMPS	28|25|21|22|23|22	141	23.5	6	1|1|2|26|29|31|1|1|1|13|28|29|3|4|3|23|24|24|12|12|14|27|26|22|29|3|2|1|26|28|21|24|22|13|15|14|18|23|18|30|19|22|24|23|20	0	0	0	0	0	-30.8	1.41	0.89
TLK2-529	P49916	LIG3	9|9|8|11|13|9	59	9.83	6	0|0|0|5|3|5|0|0|0|2|3|4|0|0|0|0|0|0|5|4|5|0|0|0|6|0|0|0|7|6|6|5|5|9|3|4|2|2|2|3|3|5|2|2|4	0.38	0.74	0.38	0.74	0.38	-1.65	3.95	0.35
TLK2-529	P49959	MRE11	28|30|25|29|28|24	164	27.33	6	41|41|30|49|48|44|4|6|6|17|25|20|3|2|2|31|32|26|6|9|10|26|23|24|25|3|6|7|24|20|22|22|25|23|19|16|17|15|15|10|17|16|15|14|16	0	0	0	0	0	-35.77	1.41	0.89
TLK2-529	P50395	GDI2	1|2|2|0|0|0	5	0.83	6	0|0|0|2|4|2|0|0|0|0|2|4|0|0|0|4|3|4|5|4|5|5|4|3|2|0|0|0|2|2|3|5|4|0|0|0|0|1|0|2|1|2|1|0|1	0	0	0	0	0	-9.38	0.49	0.84
TLK2-529	P50402	EMD	2|3|0|1|3|2	11	1.83	6	1|1|3|7|11|12|1|1|2|5|6|4|3|2|3|6|5|3|9|11|11|7|8|7|9|0|2|1|8|8|6|8|6|6|5|6|4|5|5|4|6|6|4|6|5	0	0	0	0	0	-24.89	0.35	0.89
TLK2-529	P50454	SERPINH1	14|17|15|12|11|11	80	13.33	6	6|10|9|11|12|11|6|7|7|8|18|19|6|6|3|4|3|4|13|13|14|17|16|15|14|13|14|10|16|15|19|15|18|11|8|8|10|10|9|18|16|16|20|19|23	0	0	0	0	0	-28.95	1.11	0.89
TLK2-529	P50479	PDLIM4	4|2|3|5|5|2	21	3.5	6	0|0|0|13|13|13|0|0|0|3|5|6|0|0|0|6|5|5|0|0|0|6|7|6|4|0|0|0|4|4|3|3|3|8|4|5|4|6|4|2|2|4|5|5|8	0	0	0	0	0	-12.8	0.95	0.87
TLK2-529	P50502	ST13	3|4|2|0|1|1	11	1.83	6	0|0|0|4|5|4|1|1|1|9|10|13|0|0|0|11|12|11|3|5|8|8|14|12|10|0|0|0|14|9|9|8|7|6|4|3|3|4|3|10|11|11|4|4|4	0	0	0	0	0	-26.25	0.32	0.89
TLK2-529	P50579	METAP2	1|1|0|1|1|1	5	0.83	6	0|0|0|2|2|3|0|0|0|0|1|0|0|0|0|2|3|0|2|0|2|5|5|5|0|0|0|0|2|1|1|2|1|1|0|0|1|1|1|0|1|1|0|0|0	0	0	0	0	0	-6.15	0.83	0.89
TLK2-529	P50613	CDK7	15|13|15|16|12|11	82	13.67	6	0|0|0|6|6|4|0|0|0|5|5|4|0|0|0|2|1|2|0|0|0|4|3|3|6|0|0|0|6|5|5|6|6|5|3|3|3|3|4|5|3|5|4|4|6	0.81	0.96	0.81	0.96	0.81	0.12	4.84	0.07
TLK2-529	P50747	HLCS	2|1|0|1|1|0	5	0.83	6	2|1|2|4|6|3|0|6|1|0|0|1|14|10|9|4|2|1|0|1|0|0|0|0|0|5|8|8|2|1|0|0|0|3|1|2|2|3|0|1|0|0|5|8|7	0	0	0	0	0	-13.38	0.3	0.89
TLK2-529	P50748	KNTC1	1|0|1|0|0|0	2	0.33	6	1|0|0|2|2|2|0|0|0|0|2|0|0|0|0|0|1|1|3|1|0|1|2|0|1|1|0|0|0|1|0|1|0|1|0|1|1|0|0|0|0|0|0|0|0	0	0	0	0	0	-4.95	0.6	0.89
TLK2-529	P50750	CDK9	8|8|10|10|10|13	59	9.83	6	2|1|1|4|4|3|0|1|0|8|8|9|1|0|0|0|1|1|1|2|1|3|2|2|4|0|0|1|5|4|6|7|7|4|3|3|4|4|3|3|1|2|1|2|2	0.36	0.78	0.36	0.78	0.36	-2.03	3.66	0.37
TLK2-529	P50914	RPL14	2|2|2|0|3|1	10	1.67	6	1|3|1|2|1|2|1|2|2|1|1|1|2|2|4|0|0|0|7|5|5|6|5|4|0|0|1|1|3|0|1|0|1|0|0|0|3|2|1|2|2|2|2|2|2	0	0.01	0	0.01	0	-9.99	0.9	0.83
TLK2-529	P50990	CCT8	25|27|27|16|20|19	134	22.33	6	44|42|37|148|148|142|30|42|38|84|73|71|11|11|13|43|45|39|24|22|27|43|41|41|41|29|31|32|44|43|33|35|31|38|49|64|59|57|64|61|61|58|31|35|35	0	0	0	0	0	-163.59	0.46	0.89
TLK2-529	P50991	CCT4	31|30|32|19|19|19	150	25	6	5|5|4|14|16|15|16|27|17|55|61|66|2|3|2|13|12|13|26|27|30|24|24|19|38|18|17|17|41|35|28|30|25|38|46|44|37|39|32|48|43|50|19|21|19	0	0	0	0	0	-67.69	0.95	0.89
TLK2-529	P51003	PAPOLA	48|45|52|53|51|47	296	49.33	6	5|8|6|28|26|24|0|0|0|8|16|14|0|0|0|21|19|23|0|0|0|12|11|14|18|0|0|0|17|19|13|14|13|16|15|16|22|25|23|13|13|9|22|21|18	0.65	0.84	0.65	0.84	0.65	-0.6	4.1	0.15
TLK2-529	P51114	FXR1	3|2|3|4|0|2	14	2.33	6	3|1|2|20|16|22|1|3|2|19|38|32|0|1|0|20|20|21|9|9|12|21|19|19|27|2|4|2|25|24|24|26|28|10|3|5|4|4|5|13|14|14|5|8|7	0	0	0	0	0	-56.19	0.19	0.89
TLK2-529	P51116	FXR2	1|0|0|1|0|0	2	0.33	6	0|1|2|4|3|3|0|0|0|15|18|14|0|0|0|8|11|8|7|4|6|8|9|12|16|2|0|0|18|16|15|13|12|7|5|4|3|5|4|7|9|9|0|2|2	0	0	0	0	0	-28.56	0.05	0.89
TLK2-529	P51148	RAB5C	2|3|2|2|0|0	9	1.5	6	0|1|2|5|3|4|0|0|0|1|2|1|3|2|3|2|2|2|5|3|3|4|2|2|1|0|0|0|0|0|2|0|1|1|1|1|0|1|1|1|1|0|3|6|6	0	0.01	0	0.01	0	-9.52	0.87	0.83
TLK2-529	P51149	RAB7A	3|2|2|0|0|0	7	1.17	6	0|0|0|5|5|5|0|0|0|0|0|1|2|2|3|1|1|2|4|4|3|0|1|1|0|0|0|0|0|0|0|0|0|3|4|2|1|0|0|0|0|0|2|1|0	0.02	0.07	0.02	0.07	0.02	-6.93	0.99	0.77
TLK2-529	P51398	DAP3	2|2|2|1|1|0	8	1.33	6	0|0|0|0|0|0|0|0|0|1|1|2|0|0|0|0|0|0|1|2|1|1|1|1|1|1|0|0|0|0|0|0|0|0|1|0|1|1|0|0|0|0|0|0|0	0.12	0.23	0.12	0.23	0.12	-4.26	3.75	0.62
TLK2-529	P51452	DUSP3	2|2|2|0|0|0	6	1	6	0|0|0|3|2|4|0|0|0|1|2|2|0|0|0|1|1|2|1|1|2|0|3|3|3|0|0|0|3|3|1|2|2|1|2|1|1|1|1|4|4|5|1|1|1	0	0.01	0	0.01	0	-8.34	0.69	0.83
TLK2-529	P51532	SMARCA4	8|9|8|14|10|12	61	10.17	6	2|1|3|0|0|0|2|4|3|2|4|5|0|0|0|0|0|0|5|7|7|1|1|2|4|4|6|9|4|3|5|4|4|1|3|1|3|3|3|4|3|2|2|3|2	0.46	0.94	0.46	0.94	0.46	-1.91	3.75	0.28
TLK2-529	P51570	GALK1	1|1|0|0|0|0	2	0.33	6	0|0|0|0|0|0|0|1|0|0|1|0|0|1|0|0|0|0|3|4|4|0|0|0|0|0|1|0|0|0|0|0|0|1|1|1|1|1|1|0|0|0|2|1|1	0	0	0	0	0	-5.06	0.6	0.89
TLK2-529	P51571	SSR4	5|5|4|4|6|6	30	5	6	0|2|3|2|1|3|3|4|1|2|3|3|3|3|3|2|2|3|6|4|7|6|6|6|1|3|4|3|1|1|0|0|0|1|2|2|1|0|1|3|6|2|3|5|5	0.01	0.02	0.01	0.02	0.01	-6.64	1.84	0.8
TLK2-529	P51572	BCAP31	1|1|0|0|0|0	2	0.33	6	0|0|0|0|2|4|0|0|0|0|0|0|3|3|3|0|0|1|0|0|0|0|0|0|0|0|0|0|0|1|0|0|0|3|2|2|0|1|1|0|1|1|2|4|5	0	0	0	0	0	-6.29	0.38	0.89
TLK2-529	P51608	MECP2	9|4|5|8|9|7	42	7	6	0|0|0|0|0|0|0|0|0|0|2|2|0|0|0|0|0|0|0|0|1|0|0|0|1|0|0|0|1|1|3|2|3|6|6|5|8|5|8|2|3|1|0|0|0	0.4	0.59	0.4	0.59	0.4	-1.92	5.25	0.32
TLK2-529	P51610	HCFC1	36|39|40|41|44|40	240	40	6	13|10|14|21|19|21|8|17|16|28|47|45|27|28|28|33|30|40|14|12|12|28|22|26|24|18|19|22|27|23|25|19|20|21|20|23|20|19|17|19|19|19|15|14|14	0	0	0	0	0	-29.11	1.84	0.89
TLK2-529	P51617	IRAK1	4|4|5|1|2|2	18	3	6	7|6|7|15|16|15|0|2|2|10|14|14|3|1|3|21|20|17|3|3|4|8|7|10|25|3|2|2|19|19|10|11|14|11|9|8|5|5|4|16|14|15|7|8|8	0	0	0	0	0	-38.91	0.32	0.89
TLK2-529	P51692	STAT5B	3|2|1|0|0|0	6	1	6	0|0|0|0|0|1|0|0|0|1|0|2|0|0|0|0|0|3|1|0|0|1|1|0|3|0|0|0|2|1|2|0|0|1|1|0|0|0|0|0|1|0|0|0|0	0.09	0.37	0.09	0.37	0.09	-4.69	2.14	0.66
TLK2-529	P51784	USP11	2|2|1|2|4|2	13	2.17	6	0|0|0|2|0|1|0|0|0|4|4|6|0|0|0|1|0|1|3|3|3|1|1|2|4|1|1|0|6|5|5|5|3|1|0|1|0|1|1|3|3|2|0|0|0	0.01	0.05	0.01	0.05	0.01	-7.16	1.32	0.79
TLK2-529	P51812	RPS6KA3	3|1|2|1|2|2	11	1.83	6	0|0|0|8|8|8|0|0|0|4|7|9|0|0|0|11|12|12|2|2|3|7|6|6|12|0|0|0|11|13|6|9|8|10|3|2|5|5|4|4|4|6|7|8|8	0	0	0	0	0	-20.61	0.36	0.89
TLK2-529	P51858	HDGF	11|7|9|13|15|16	71	11.83	6	1|1|1|24|35|29|0|0|0|6|9|13|0|0|0|18|16|17|2|1|2|10|10|13|13|1|2|1|13|11|6|7|6|11|16|19|15|13|17|11|8|10|9|12|13	0	0	0	0	0	-25.13	1.26	0.88
TLK2-529	P51946	CCNH	11|7|9|7|7|8	49	8.17	6	0|0|0|1|3|3|0|0|0|3|6|5|0|0|0|0|0|0|0|0|0|4|2|5|8|0|0|0|8|8|5|6|5|3|3|3|1|1|1|2|3|3|0|1|2	0.29	0.59	0.29	0.59	0.29	-1.59	3.87	0.41
TLK2-529	P51948	MNAT1	10|12|10|7|7|7	53	8.83	6	0|0|0|6|3|4|0|0|0|5|4|5|0|0|0|5|4|7|0|0|0|4|5|5|7|0|0|0|7|6|5|5|5|2|3|1|2|3|4|2|3|2|3|3|4	0.25	0.68	0.25	0.68	0.25	-3.11	3.21	0.46
TLK2-529	P51970	NDUFA8	1|1|1|0|0|0	3	0.5	6	0|0|0|1|0|1|0|0|0|0|0|0|0|0|0|1|0|0|0|1|0|0|0|0|0|0|0|0|0|0|0|0|0|0|0|0|0|0|0|0|0|0|0|0|0	0	0	0	0	0	-3.34	5	0.89
TLK2-529	P51991	HNRNPA3	8|11|11|7|8|10	55	9.17	6	9|7|8|10|9|9|2|4|6|8|15|18|5|5|5|2|3|4|23|29|28|9|12|10|9|3|6|5|8|12|16|19|19|13|15|14|5|6|8|11|14|17|2|5|7	0	0	0	0	0	-28.01	0.91	0.89
TLK2-529	P52209	PGD	2|1|1|0|0|0	4	0.67	6	2|0|0|3|4|7|0|0|0|3|8|8|1|1|0|5|4|4|6|6|6|10|5|9|7|0|0|0|6|8|6|6|6|2|1|1|1|1|0|8|8|7|1|1|2	0	0	0	0	0	-17.43	0.18	0.89
TLK2-529	P52272	HNRNPM	22|25|21|13|16|13	110	18.33	6	4|5|4|19|23|21|6|7|6|21|34|35|9|7|8|24|26|27|32|35|31|30|30|30|33|7|9|6|31|33|21|24|20|19|22|19|15|12|11|20|35|35|12|22|19	0	0	0	0	0	-54.87	0.92	0.89
TLK2-529	P52292	KPNA2	10|9|6|7|7|7	46	7.67	6	2|2|0|6|5|5|1|2|1|8|13|12|1|1|0|14|15|14|16|14|14|10|11|12|12|2|2|3|14|9|9|8|10|5|2|3|2|2|2|14|13|15|6|7|6	0	0	0	0	0	-19.12	1.06	0.88
TLK2-529	P52294	KPNA1	2|4|3|2|3|3	17	2.83	6	0|1|1|2|3|2|0|2|1|5|6|4|0|0|0|1|2|2|3|2|3|2|2|2|3|0|1|3|3|3|4|5|5|2|3|3|0|1|0|2|4|5|0|1|1	0	0.01	0	0.01	0	-7.43	1.34	0.83
TLK2-529	P52298	NCBP2	3|2|3|1|1|1	11	1.83	6	0|0|0|1|1|1|0|0|0|1|1|0|0|0|0|0|0|0|0|1|1|1|1|1|0|0|0|0|1|0|0|1|1|0|1|0|0|1|1|0|0|1|0|0|0	0.21	0.54	0.21	0.54	0.21	-2.73	4.85	0.5
TLK2-529	P52434	POLR2H	2|5|4|3|3|3	20	3.33	6	2|2|1|6|5|6|0|1|0|3|1|3|1|1|1|1|2|0|4|4|6|2|2|2|3|1|2|2|2|4|5|4|4|3|4|3|3|2|3|3|5|5|4|2|3	0	0	0	0	0	-9.66	1.22	0.84
TLK2-529	P52565	ARHGDIA	4|2|2|1|1|0	10	1.67	6	0|0|0|15|13|10|0|0|0|7|11|11|4|2|4|15|20|17|11|10|8|11|11|11|11|0|0|1|12|13|10|13|12|10|11|8|10|12|8|13|11|13|4|6|7	0	0	0	0	0	-38.02	0.2	0.89
TLK2-529	P52594	AGFG1	5|6|5|10|8|7	41	6.83	6	0|0|1|13|15|13|2|2|1|13|17|18|4|4|4|20|20|25|1|2|3|16|13|12|20|2|4|1|19|18|14|14|15|13|8|4|2|2|3|10|11|13|5|10|9	0	0	0	0	0	-28.33	0.74	0.89
TLK2-529	P52597	HNRNPF	11|13|13|10|10|11	68	11.33	6	3|3|2|11|11|14|5|6|4|23|42|49|5|4|3|25|23|20|14|19|20|20|22|20|62|4|4|4|36|38|35|42|51|12|12|19|9|14|11|19|21|21|8|8|7	0	0	0	0	0	-52.05	0.63	0.89
TLK2-529	P52655	GTF2A1	52|45|45|26|23|28	219	36.5	6	1|2|1|6|9|6|1|0|1|7|6|9|2|2|2|10|10|7|0|0|0|5|5|7|4|0|1|0|4|4|6|3|6|6|7|6|6|6|6|5|2|2|2|2|2	1	1	1	1	1	4.38	9.18	0
TLK2-529	P52701	MSH6	29|29|29|24|25|28	164	27.33	6	0|3|1|25|28|27|0|0|0|6|11|10|1|1|0|17|20|20|11|8|11|16|13|14|17|0|1|0|17|17|16|13|15|19|16|17|9|13|9|14|13|15|14|14|14	0	0	0	0	0	-10.93	2.43	0.85
TLK2-529	P52739	ZNF131	7|7|10|23|20|21	88	14.67	6	0|1|0|3|3|3|0|0|0|0|2|3|0|0|0|2|3|3|1|0|1|1|1|1|3|0|0|0|1|3|3|3|3|1|2|1|3|1|0|1|1|2|2|1|1	0.97	1	0.97	1	0.97	2.44	11	0.01
TLK2-529	P52756	RBM5	4|7|4|4|4|5	28	4.67	6	0|0|0|1|1|0|0|0|0|3|4|3|0|0|0|4|4|4|1|0|0|0|1|1|0|0|0|0|2|2|0|0|0|2|3|2|1|2|3|4|3|3|0|0|0	0.25	0.62	0.25	0.62	0.25	-1.74	3.89	0.46
TLK2-529	P52788	SMS	1|1|0|2|0|0	4	0.67	6	0|0|0|2|3|3|0|0|0|1|2|2|0|0|0|0|0|0|4|4|5|0|1|2|0|0|0|0|0|1|0|0|1|1|0|0|6|5|4|2|1|1|5|6|5	0	0.01	0	0.01	0	-8.31	0.45	0.84
TLK2-529	P52815	MRPL12	1|2|1|1|2|1	8	1.33	6	0|0|0|0|0|0|1|0|1|0|1|3|0|0|0|0|0|0|3|3|3|2|2|2|1|0|0|0|1|0|0|0|0|1|0|1|2|3|2|1|0|0|1|1|1	0.02	0.06	0.02	0.06	0.02	-4.2	1.67	0.77
TLK2-529	P52907	CAPZA1	10|11|8|10|8|10	57	9.5	6	9|8|9|23|21|29|5|8|8|15|24|23|1|0|1|4|4|4|7|8|8|16|14|17|18|7|8|5|18|16|12|11|15|11|15|17|15|12|13|15|19|16|12|12|13	0	0	0	0	0	-34.09	0.78	0.89
TLK2-529	P52926	HMGA2	8|8|7|1|6|6	36	6	6	2|1|1|2|3|4|0|0|0|0|3|3|0|0|0|0|0|0|2|4|3|2|2|2|1|1|0|0|1|1|3|1|2|4|3|4|4|5|5|4|4|2|0|0|0	0.37	0.65	0.37	0.65	0.37	-7.66	3.42	0.36
TLK2-529	P52948	NUP98	5|6|5|4|7|3	30	5	6	4|7|3|11|12|9|1|5|4|9|14|15|2|2|2|14|18|16|4|8|7|14|12|12|14|6|7|5|14|16|11|15|10|8|5|3|3|2|3|13|12|12|2|7|7	0	0	0	0	0	-29.68	0.59	0.89
TLK2-529	P52952	NKX2-5	1|1|2|2|1|1	8	1.33	6	0|0|0|1|0|1|0|0|0|0|0|0|0|0|0|0|0|0|0|0|0|0|0|0|0|1|0|0|0|0|0|0|0|0|0|0|0|0|0|0|0|0|0|0|0	0.26	0.77	0.26	0.77	0.26	-0.83	13.33	0.45
TLK2-529	P53004	BLVRA	1|3|0|1|0|1	6	1	6	0|1|2|3|3|2|1|0|1|3|6|6|1|1|1|5|4|4|5|6|5|4|2|2|4|3|5|2|4|3|1|2|1|3|3|1|1|1|2|5|5|5|2|3|2	0	0	0	0	0	-14.13	0.36	0.87
TLK2-529	P53007	SLC25A1	1|1|0|2|2|3	9	1.5	6	0|0|0|1|1|0|0|0|0|0|0|0|1|2|2|0|0|0|1|3|1|1|1|1|0|1|2|2|0|1|0|1|1|0|3|0|0|0|0|1|2|2|2|2|3	0.04	0.16	0.04	0.16	0.04	-5.97	1.78	0.72
TLK2-529	P53350	PLK1	6|6|5|5|5|6	33	5.5	6	0|0|0|0|0|1|0|0|0|1|1|2|0|0|1|0|0|0|1|1|0|0|0|0|3|0|1|0|4|3|1|0|1|1|1|0|1|1|0|1|1|0|0|0|0	0.84	0.91	0.84	0.91	0.84	1.19	9.17	0.05
TLK2-529	P53367	ARFIP1	1|1|1|0|1|0	4	0.67	6	1|1|0|7|8|11|0|0|0|3|3|4|0|1|0|7|8|6|0|0|0|4|4|3|5|0|0|1|6|4|4|5|4|6|4|3|3|3|3|3|2|2|5|3|4	0	0	0	0	0	-15.19	0.21	0.89
TLK2-529	P53396	ACLY	5|6|3|5|6|5	30	5	6	3|2|2|17|23|22|4|6|7|58|60|61|5|7|6|40|38|31|18|18|14|55|53|54|56|8|8|8|53|53|43|46|49|12|7|4|12|11|8|62|53|49|14|14|16	0	0	0	0	0	-105.77	0.19	0.89
TLK2-529	P53618	COPB1	3|2|6|5|3|2	21	3.5	6	0|0|1|10|7|10|0|3|4|3|10|12|3|3|4|7|8|7|9|12|9|7|15|12|14|5|6|7|12|13|8|9|11|6|4|3|4|5|4|14|14|15|9|9|9	0	0	0	0	0	-28.21	0.47	0.89
TLK2-529	P53621	COPA	10|7|8|5|5|2	37	6.17	6	0|0|1|13|12|13|0|0|1|11|18|20|2|0|3|12|8|11|19|20|24|11|15|15|17|1|1|1|20|16|13|15|14|16|7|7|8|9|5|15|14|9|5|1|3	0	0	0	0	0	-36.14	0.65	0.89
TLK2-529	P53985	SLC16A1	3|2|3|2|7|6	23	3.83	6	3|3|2|3|4|4|0|2|1|1|2|1|3|3|4|6|4|5|3|4|4|5|4|4|3|6|6|7|6|4|3|4|5|8|2|2|6|3|3|3|5|3|5|2|2	0	0	0	0	0	-12.95	1.06	0.85
TLK2-529	P53999	SUB1	7|7|8|4|6|5	37	6.17	6	1|1|3|24|23|23|2|0|0|9|9|9|1|2|2|11|14|11|3|3|3|9|7|7|8|0|2|2|6|8|11|11|10|8|10|11|11|13|12|11|12|11|9|10|9	0	0	0	0	0	-25.68	0.77	0.89
TLK2-529	P54105	CLNS1A	2|2|2|6|5|5	22	3.67	6	1|1|1|1|7|5|0|1|0|3|4|7|0|0|0|1|1|2|2|3|3|5|3|2|4|0|1|0|5|4|4|4|5|5|4|5|6|8|5|3|4|5|2|2|3	0	0.01	0	0.01	0	-10.32	1.25	0.83
TLK2-529	P54132	BLM	6|4|4|6|6|6	32	5.33	6	2|1|0|3|3|4|0|2|0|2|5|4|2|1|1|1|1|1|2|2|2|3|1|2|5|1|1|1|5|5|4|4|3|3|3|1|2|1|2|2|3|2|2|1|0	0.08	0.11	0.08	0.11	0.08	-4.67	2.5	0.67
TLK2-529	P54136	RARS1	7|9|8|11|9|13	57	9.5	6	7|8|6|18|13|19|2|3|3|0|2|4|0|0|0|0|1|0|14|16|15|4|4|4|5|3|2|1|4|3|4|5|5|20|16|16|11|15|14|3|2|2|13|22|20	0	0	0	0	0	-17.73	1.3	0.88
TLK2-529	P54198	HIRA	3|3|2|2|3|2	15	2.5	6	0|0|0|0|0|0|0|0|0|0|0|1|0|0|0|1|0|1|0|0|0|0|0|0|0|1|1|1|0|0|0|0|0|2|1|1|1|0|1|0|0|0|0|0|0	0.52	0.71	0.52	0.71	0.52	-0.72	9.38	0.23
TLK2-529	P54277	PMS1	10|8|10|13|18|13	72	12	6	0|1|0|1|2|2|0|0|1|1|4|4|1|0|0|2|1|0|0|0|0|1|0|0|1|0|0|0|2|2|1|0|1|3|3|4|4|2|2|0|0|1|1|1|2	0.98	1	0.98	1	0.98	2.54	10.59	0
TLK2-529	P54278	PMS2	10|6|5|6|7|9	43	7.17	6	0|0|0|0|0|0|0|0|0|2|3|2|0|0|0|2|2|1|0|0|0|0|0|0|1|0|0|0|2|2|2|4|1|1|1|1|2|2|1|0|2|1|1|1|0	0.9	1	0.9	1	0.9	0.76	8.72	0.03
TLK2-529	P54577	YARS1	2|2|3|0|0|1	8	1.33	6	0|0|0|7|9|7|0|0|0|8|9|9|0|0|0|5|9|11|6|9|9|10|8|8|11|0|0|0|11|10|5|7|8|10|6|6|6|5|6|9|6|10|5|8|9	0	0	0	0	0	-26.99	0.23	0.89
TLK2-529	P54578	USP14	7|9|8|8|8|8	48	8	6	0|0|1|39|38|38|0|1|0|6|7|9|0|0|1|12|11|9|7|8|10|11|8|9|10|0|0|0|12|11|7|5|9|16|38|23|21|21|24|8|8|9|18|16|21	0	0	0	0	0	-31.61	0.72	0.89
TLK2-529	P54619	PRKAG1	2|3|1|3|0|2	11	1.83	6	0|0|0|6|6|4|0|0|0|5|8|9|0|0|0|0|0|0|2|3|1|5|5|4|7|0|0|0|7|7|6|7|7|3|4|5|2|4|3|7|8|8|6|4|4	0	0	0	0	0	-16.75	0.53	0.89
TLK2-529	P54709	ATP1B3	2|1|1|0|0|0	4	0.67	6	0|0|0|0|0|0|0|0|0|0|1|0|1|0|0|0|0|0|1|1|1|1|1|1|0|1|1|1|0|0|0|0|0|0|0|0|0|0|1|0|0|0|0|0|0	0.05	0.33	0.05	0.33	0.05	-3.94	2.5	0.7
TLK2-529	P54727	RAD23B	3|4|1|2|3|3	16	2.67	6	0|0|0|0|1|0|0|0|0|1|2|1|0|0|0|3|2|2|1|1|1|2|1|1|1|0|0|0|1|1|0|0|1|1|1|0|2|1|0|2|3|1|2|2|1	0.14	0.35	0.14	0.35	0.14	-4.49	3.08	0.58
TLK2-529	P55010	EIF5	11|11|9|5|5|5	46	7.67	6	6|7|7|46|39|42|0|0|0|10|12|16|2|1|1|11|9|13|5|3|4|12|9|14|10|0|0|2|12|13|8|14|11|21|20|21|17|26|29|8|10|11|21|23|21	0	0	0	0	0	-41.48	0.61	0.89
TLK2-529	P55036	PSMD4	7|1|4|1|2|3	18	3	6	2|2|2|7|5|10|2|4|2|6|7|7|3|2|3|8|9|7|5|4|4|8|6|7|8|4|5|3|7|5|3|4|3|5|8|7|7|9|9|7|5|5|2|4|2	0	0	0	0	0	-21.55	0.58	0.88
TLK2-529	P55039	DRG2	1|2|0|0|0|1	4	0.67	6	0|0|0|8|8|7|0|0|0|9|11|15|1|0|0|16|12|11|3|2|3|8|7|9|13|0|1|0|13|13|13|12|16|7|8|7|4|5|4|12|12|13|12|12|12	0	0	0	0	0	-32.28	0.09	0.89
TLK2-529	P55060	CSE1L	4|7|3|4|6|3	27	4.5	6	1|0|0|0|2|4|1|3|2|8|13|13|4|4|1|19|19|16|25|26|25|15|15|11|25|4|3|3|20|20|15|16|16|6|4|1|3|3|2|19|14|14|2|3|1	0	0	0	0	0	-32.93	0.48	0.89
TLK2-529	P55072	VCP	13|12|14|8|7|8	62	10.33	6	1|1|1|13|16|18|7|11|10|50|65|63|4|5|6|16|18|16|15|17|15|25|30|30|35|14|18|19|41|37|32|34|33|8|9|8|10|8|7|21|22|21|7|12|11	0	0	0	0	0	-63.35	0.54	0.89
TLK2-529	P55081	MFAP1	7|13|11|4|7|4	46	7.67	6	1|1|1|2|4|5|0|1|1|2|3|3|0|0|0|5|5|4|2|2|2|2|3|3|3|1|1|3|6|2|4|5|5|2|2|4|1|4|2|0|3|2|0|1|2	0.4	1	0.4	1	0.4	-5.38	3.29	0.32
TLK2-529	P55084	HADHB	1|0|0|0|0|0	1	0.17	6	0|0|0|0|0|0|0|0|0|0|0|0|0|0|0|0|0|0|1|3|2|0|0|0|0|0|0|0|0|0|0|0|0|2|2|0|0|0|0|0|0|0|0|0|0	0	0	0	0	0	-3.82	0.75	0.89
TLK2-529	P55196	AFDN	21|18|20|17|12|19	107	17.83	6	20|22|19|35|36|39|0|1|3|34|48|45|16|17|12|76|77|80|2|2|3|36|32|30|57|2|9|7|57|67|38|46|40|42|36|32|18|25|30|32|34|44|19|26|23	0	0	0	0	0	-98	0.59	0.89
TLK2-529	P55197	MLLT10	2|1|0|0|0|0	3	0.5	6	0|0|0|0|0|0|0|0|0|0|0|0|0|0|0|0|0|0|0|0|0|0|0|0|0|0|0|0|0|0|1|1|1|0|0|0|0|0|0|0|0|0|0|0|0	0.13	0.77	0.13	0.77	0.13	-3.34	5	0.59
TLK2-529	P55199	ELL	1|0|0|0|1|1	3	0.5	6	0|0|0|0|1|0|0|1|0|0|0|0|0|0|0|0|0|0|1|1|1|1|0|1|0|1|0|0|0|1|1|0|0|1|2|2|0|0|0|0|0|0|0|0|0	0	0	0	0	0	-4.18	1.5	0.89
TLK2-529	P55209	NAP1L1	6|7|7|6|6|7	39	6.5	6	1|3|2|20|23|22|2|2|2|8|17|22|0|1|1|9|7|8|12|11|9|15|13|12|14|1|2|4|13|15|11|10|13|19|24|51|24|24|25|11|10|10|12|14|11	0	0	0	0	0	-36.99	0.54	0.89
TLK2-529	P55265	ADAR	18|20|17|19|17|20	111	18.5	6	1|3|1|24|20|25|1|3|2|12|22|24|7|7|8|33|28|29|13|14|14|18|21|20|28|2|4|5|31|32|21|19|20|22|17|9|10|13|11|18|19|20|11|12|9	0	0	0	0	0	-31	1.22	0.89
TLK2-529	P55327	TPD52	1|0|2|2|2|3	10	1.67	6	0|0|0|6|4|3|0|1|0|11|10|11|0|0|0|6|6|5|0|0|1|5|4|7|11|1|1|1|9|10|7|6|7|4|3|1|3|3|4|9|9|8|5|8|8	0	0	0	0	0	-20.62	0.38	0.89
TLK2-529	P55735	SEC13	3|0|0|3|2|1	9	1.5	6	0|0|0|2|1|1|0|0|1|4|5|4|0|1|1|2|3|3|2|5|3|3|1|1|9|2|3|1|6|6|5|5|3|1|0|0|1|1|1|2|2|2|2|1|1	0	0	0	0	0	-11.08	0.7	0.85
TLK2-529	P55769	SNU13	2|1|2|1|1|1	8	1.33	6	0|0|0|0|0|0|0|1|0|1|0|0|0|0|0|0|0|0|3|4|3|1|2|2|1|0|0|1|1|0|0|1|1|1|0|0|1|1|1|1|1|1|1|1|1	0.02	0.07	0.02	0.07	0.02	-3.95	1.87	0.76
TLK2-529	P55786	NPEPPS	2|2|1|1|0|0	6	1	6	1|0|0|9|11|12|0|0|0|0|1|1|0|0|0|0|0|0|7|8|8|2|2|3|1|0|0|0|1|1|0|1|0|5|3|0|3|3|1|2|0|2|4|6|5	0	0	0	0	0	-11.29	0.44	0.89
TLK2-529	P55795	HNRNPH2	2|2|1|4|4|3	16	2.67	6	0|1|0|1|2|1|1|1|0|5|3|3|0|0|0|2|1|2|4|8|7|2|4|5|4|0|1|1|4|5|3|4|6|0|0|0|2|1|0|2|3|4|0|0|4	0	0.01	0	0.01	0	-8.86	1.24	0.82
TLK2-529	P55884	EIF3B	5|6|5|3|3|3	25	4.17	6	3|6|4|13|15|16|4|5|3|16|18|18|0|0|0|0|1|1|13|15|16|11|8|10|14|6|7|6|11|12|9|16|14|16|9|6|8|9|9|10|10|10|9|11|11	0	0	0	0	0	-32.24	0.46	0.89
TLK2-529	P56134	ATP5MF	1|0|0|0|0|0	1	0.17	6	0|0|0|1|1|1|0|1|1|0|0|0|2|2|2|1|0|0|2|2|2|2|2|1|0|1|2|2|0|0|0|0|0|0|0|0|0|0|0|0|0|0|2|1|2	0	0	0	0	0	-5.55	0.23	0.89
TLK2-529	P56192	MARS1	7|4|5|3|3|2	24	4	6	1|0|3|3|7|6|0|0|1|2|5|3|0|0|0|3|2|3|12|13|12|6|4|6|7|5|6|6|6|7|5|4|3|5|2|2|6|6|5|4|7|6|4|2|2	0	0	0	0	0	-15.13	0.94	0.87
TLK2-529	P56537	EIF6	1|2|2|0|0|0	5	0.83	6	1|0|0|6|5|4|0|2|0|0|0|0|0|0|0|0|0|1|5|3|3|1|1|1|2|0|0|0|3|2|1|1|2|0|0|0|0|0|0|1|0|1|2|1|1	0.01	0.03	0.01	0.03	0.01	-6.63	0.75	0.8
TLK2-529	P56545	CTBP2	1|1|2|0|2|1	7	1.17	6	1|0|0|2|2|2|1|0|1|5|7|7|0|0|0|6|8|8|4|5|3|4|4|3|5|0|1|1|4|5|5|4|5|2|1|1|2|1|1|6|4|5|0|0|1	0	0	0	0	0	-14.03	0.41	0.89
TLK2-529	P57071	PRDM15	1|0|0|0|0|0	1	0.17	6	0|0|0|0|0|0|0|0|0|0|0|0|0|0|0|0|0|0|0|0|0|0|0|0|0|0|0|0|0|0|0|0|0|0|0|0|0|0|0|0|0|0|0|0|0	0	0	0	0	0	-3.34	1.67	0.89
TLK2-529	P57073	SOX8	1|1|2|0|1|1	6	1	6	0|0|0|0|0|0|0|0|0|0|0|0|0|0|0|0|0|0|0|0|0|0|0|0|0|0|0|0|0|0|0|0|0|0|0|0|0|0|0|0|0|0|0|0|0	0.13	0.77	0.13	0.77	0.13	-3.34	10	0.59
TLK2-529	P57737	CORO7	3|3|0|3|2|3	14	2.33	6	0|0|0|10|9|8|0|0|0|5|3|3|0|0|0|5|4|4|5|4|4|4|3|3|8|0|0|0|5|7|4|3|4|6|4|4|5|3|3|2|4|5|5|10|8	0	0	0	0	0	-17.51	0.64	0.89
TLK2-529	P57740	NUP107	2|0|0|3|3|3	11	1.83	6	2|2|1|3|4|4|0|0|0|2|8|5|1|0|0|0|4|4|8|8|7|9|11|8|13|1|2|0|12|14|10|10|12|4|3|2|2|0|3|3|3|2|5|5|2	0	0	0	0	0	-20.64	0.41	0.89
TLK2-529	P58107	EPPK1	1|0|0|1|1|1	4	0.67	6	0|1|0|3|6|5|1|3|3|5|9|8|4|3|2|6|6|7|30|29|29|12|6|7|6|4|3|1|6|6|9|14|11|1|0|1|2|1|2|7|7|7|8|6|9	0	0	0	0	0	-29.8	0.1	0.89
TLK2-529	P59998	ARPC4	1|0|0|0|0|0	1	0.17	6	0|0|0|5|5|6|0|1|1|7|12|12|1|1|1|0|2|1|2|1|2|6|5|7|5|0|0|1|4|5|8|7|6|3|4|4|2|4|3|7|7|8|4|4|3	0	0	0	0	0	-17.76	0.04	0.89
TLK2-529	P60174	TPI1	1|1|1|0|0|0	3	0.5	6	0|0|0|4|6|7|0|0|1|0|0|0|1|1|2|0|0|0|15|13|13|0|0|0|0|0|0|0|2|0|0|0|0|1|0|1|0|0|0|0|0|0|0|0|1	0	0	0	0	0	-7.94	0.33	0.89
TLK2-529	P60228	EIF3E	6|7|6|3|3|3	28	4.67	6	0|0|0|2|5|2|3|5|2|10|16|19|0|0|1|0|0|0|16|14|14|7|7|6|15|3|3|5|12|14|13|12|12|16|17|13|6|7|8|13|14|9|7|7|9	0	0	0	0	0	-26.23	0.61	0.89
TLK2-529	P60468	SEC61B	1|3|2|0|0|0	6	1	6	0|1|0|4|4|4|0|1|1|1|2|1|2|1|1|3|2|3|0|0|1|0|0|0|2|0|0|0|1|2|1|2|1|2|3|4|1|1|1|0|1|2|0|0|1	0.01	0.04	0.01	0.04	0.01	-7.58	0.79	0.8
TLK2-529	P60510	PPP4C	6|5|6|6|5|6	34	5.67	6	0|0|0|3|4|4|0|0|0|3|2|3|0|0|0|0|0|0|1|1|1|2|2|2|3|1|1|1|3|2|2|2|2|2|1|3|3|3|5|3|2|2|1|2|4	0.32	0.4	0.32	0.4	0.32	-1.76	3.36	0.4
TLK2-529	P60660	MYL6	8|7|7|4|5|6	37	6.17	6	0|0|0|3|2|2|4|6|5|8|13|11|0|0|0|0|0|0|6|7|10|2|3|3|8|4|4|4|7|9|9|11|8|6|5|5|5|6|4|10|10|12|6|6|6	0	0	0	0	0	-14.74	1.21	0.87
TLK2-529	P60709	ACTB	16|17|21|12|12|13	91	15.17	6	13|8|5|28|26|28|9|10|11|14|16|14|11|9|8|8|9|10|45|40|39|19|14|18|14|7|6|9|14|14|11|12|11|14|20|16|23|21|16|16|15|15|19|48|41	0	0	0	0	0	-45.94	0.88	0.89
TLK2-529	P60842	EIF4A1	9|9|8|3|2|3	34	5.67	6	10|6|5|15|18|15|3|6|2|6|14|15|5|3|4|8|7|6|36|35|32|20|20|21|13|12|13|10|16|12|13|15|12|13|6|5|14|12|10|14|13|15|14|13|16	0	0	0	0	0	-50.18	0.45	0.89
TLK2-529	P60866	RPS20	1|3|3|2|3|3	15	2.5	6	6|6|5|7|9|9|3|4|4|4|5|4|4|5|5|7|5|6|6|6|6|6|7|5|4|1|2|1|4|4|4|4|4|3|4|6|5|2|2|2|3|3|6|6|6	0	0	0	0	0	-19.27	0.54	0.89
TLK2-529	P60891	PRPS1	3|5|4|1|1|2	16	2.67	6	0|0|0|0|0|0|0|0|0|0|1|2|1|1|1|0|0|0|3|5|8|2|1|1|0|0|1|1|1|0|2|3|2|2|0|2|0|0|0|0|1|1|0|2|2	0.11	0.33	0.11	0.33	0.11	-4.75	2.61	0.62
TLK2-529	P60953	CDC42	2|1|2|1|1|0	7	1.17	6	0|0|0|3|5|5|0|0|0|0|0|0|3|2|3|5|5|6|3|3|4|2|3|5|1|0|0|0|1|0|0|0|1|0|0|0|0|0|0|0|0|0|1|1|1	0	0.01	0	0.01	0	-7.9	0.83	0.82
TLK2-529	P60981	DSTN	1|1|0|0|0|0	2	0.33	6	0|0|0|1|1|0|0|0|0|1|3|3|2|3|1|2|2|1|1|4|5|1|2|1|3|0|0|0|2|2|1|1|3|2|0|0|0|0|0|1|0|0|1|0|0	0	0	0	0	0	-6.81	0.3	0.89
TLK2-529	P61011	SRP54	6|2|5|2|0|3	18	3	6	0|0|0|17|17|18|1|1|2|33|37|41|5|4|5|52|47|52|5|5|4|32|31|34|27|2|2|1|28|27|31|29|28|8|10|10|3|4|3|27|28|32|10|11|11	0	0	0	0	0	-76.83	0.17	0.89
TLK2-529	P61020	RAB5B	1|1|1|0|0|0	3	0.5	6	0|0|0|0|0|0|0|0|0|0|0|0|0|0|0|0|0|0|1|1|1|1|2|2|0|0|0|0|0|0|0|0|0|0|0|0|0|0|0|0|0|0|0|0|1	0	0	0	0	0	-3.7	2.5	0.89
TLK2-529	P61026	RAB10	1|2|1|1|1|0	6	1	6	1|0|0|3|2|1|0|0|0|0|1|0|3|3|3|1|1|1|2|3|2|0|2|3|2|0|0|1|0|1|0|2|2|0|0|0|0|0|0|1|1|1|1|2|4	0	0.02	0	0.02	0	-6.9	0.9	0.83
TLK2-529	P61077	UBE2D3	1|1|0|0|0|0	2	0.33	6	1|0|0|1|0|0|0|0|0|0|0|0|0|1|0|0|0|0|0|1|1|0|0|0|0|0|0|0|0|0|0|0|0|0|1|0|0|0|0|0|0|0|0|0|0	0	0	0	0	0	-3.46	2.5	0.89
TLK2-529	P61081	UBE2M	4|4|3|3|3|3	20	3.33	6	0|1|1|13|15|17|0|1|2|13|10|11|3|3|4|16|16|15|3|5|5|5|8|8|12|0|1|2|8|13|4|8|8|5|9|13|6|6|7|7|13|17|3|8|7	0	0	0	0	0	-25.23	0.45	0.89
TLK2-529	P61088	UBE2N	2|2|2|0|0|0	6	1	6	0|0|0|1|1|1|0|0|0|0|0|0|1|4|3|0|2|1|5|5|6|3|3|2|1|0|0|0|2|1|0|1|1|2|5|1|3|3|3|1|0|1|2|2|2	0	0.01	0	0.01	0	-8.63	0.65	0.83
TLK2-529	P61129	ZC3H6	1|0|1|1|1|1	5	0.83	6	0|0|0|0|0|0|0|0|0|0|0|0|0|0|0|0|0|0|0|0|0|1|1|1|3|0|0|0|2|3|2|2|3|0|0|0|0|0|0|0|1|0|0|0|0	0	0	0	0	0	-4.57	1.97	0.89
TLK2-529	P61160	ACTR2	1|0|1|0|0|0	2	0.33	6	0|0|0|4|5|3|0|1|0|9|15|19|0|0|0|1|1|0|3|5|6|12|12|10|11|0|1|0|11|12|10|11|9|4|2|2|1|2|3|11|10|10|7|9|8	0	0	0	0	0	-24.48	0.06	0.89
TLK2-529	P61163	ACTR1A	2|1|3|1|0|2	9	1.5	6	3|2|2|6|6|3|1|1|1|2|2|2|0|0|0|0|0|0|4|4|4|3|4|5|4|2|2|2|4|5|4|2|6|3|3|2|3|6|7|3|3|4|3|1|3	0	0	0	0	0	-14.2	0.53	0.87
TLK2-529	P61201	COPS2	3|3|3|1|3|3	16	2.67	6	0|0|0|1|1|1|0|0|0|6|8|9|0|0|0|0|0|0|1|3|2|4|4|3|7|1|0|0|8|8|5|5|5|2|1|0|0|1|1|11|7|5|1|3|3	0	0	0	0	0	-10.47	1.03	0.85
TLK2-529	P61224	RAP1B	1|1|0|1|2|1	6	1	6	0|0|0|2|1|2|0|0|0|0|0|0|1|1|1|0|0|0|3|3|2|1|1|1|0|0|0|0|0|0|1|1|1|0|0|0|1|1|1|0|0|0|0|1|1	0.02	0.1	0.02	0.1	0.02	-5.11	1.67	0.78
TLK2-529	P61244	MAX	2|2|2|0|1|2	9	1.5	6	0|0|0|2|0|0|0|0|0|0|1|2|0|0|0|2|3|2|0|0|0|1|0|0|1|0|0|0|2|1|0|0|1|1|1|0|0|1|1|0|1|1|0|0|0	0.08	0.12	0.08	0.12	0.08	-4.89	2.81	0.67
TLK2-529	P61247	RPS3A	4|6|6|1|0|3	20	3.33	6	1|2|1|42|36|35|3|12|9|6|13|9|4|3|2|2|2|3|7|7|9|5|10|9|9|2|3|1|4|7|2|9|7|3|9|9|0|0|1|1|7|8|10|12|17	0	0	0	0	0	-35.28	0.42	0.89
TLK2-529	P61254	RPL26	1|1|0|0|1|1	4	0.67	6	3|4|4|1|2|1|3|2|2|2|3|4|3|3|2|0|0|0|3|4|4|3|1|3|1|0|1|0|1|0|1|0|0|1|2|3|1|1|1|1|1|2|2|2|3	0	0	0	0	0	-9.84	0.37	0.89
TLK2-529	P61289	PSME3	48|53|51|67|84|95	398	66.33	6	4|5|3|28|26|28|3|6|4|20|24|27|0|0|2|13|13|14|3|4|5|23|23|26|23|6|4|5|21|23|17|23|21|20|23|20|23|23|29|19|18|16|14|12|14	0.55	1	0.55	1	0.55	-3.59	4.4	0.21
TLK2-529	P61313	RPL15	3|2|3|0|0|0	8	1.33	6	2|4|4|4|4|4|6|12|8|3|5|6|9|9|8|1|1|1|17|14|12|12|11|11|5|2|6|4|4|5|6|3|4|2|3|2|1|0|0|3|3|5|4|6|6	0	0	0	0	0	-24.94	0.25	0.89
TLK2-529	P61326	MAGOH	3|1|1|3|4|4	16	2.67	6	0|0|0|3|2|3|0|1|1|4|5|5|0|0|0|3|5|4|5|7|6|8|7|7|6|0|0|0|5|7|5|5|4|5|2|1|4|2|2|6|8|8|0|2|2	0	0	0	0	0	-13.52	0.8	0.87
TLK2-529	P61353	RPL27	2|3|3|5|3|3	19	3.17	6	4|4|2|4|2|4|3|4|5|2|3|3|4|4|4|2|2|2|10|9|8|7|8|9|4|3|4|4|4|4|5|4|5|3|1|1|1|1|1|5|4|4|4|4|5	0	0	0	0	0	-14.37	0.79	0.87
TLK2-529	P61457	PCBD1	1|1|1|0|1|1	5	0.83	6	0|0|0|2|1|2|0|0|0|0|1|0|0|0|0|1|0|0|0|0|0|0|1|0|0|0|0|0|0|1|0|0|1|1|1|2|2|2|2|0|0|0|0|0|0	0	0	0	0	0	-4.57	1.88	0.89
TLK2-529	P61513	RPL37A	1|0|0|0|1|1	3	0.5	6	1|2|1|2|1|2|1|1|1|0|0|0|2|0|1|0|0|0|1|2|3|2|2|2|0|0|0|1|0|0|0|0|0|0|0|0|1|1|1|1|2|1|1|2|0	0	0	0	0	0	-6.02	0.59	0.89
TLK2-529	P61586	RHOA	1|0|0|0|1|0	2	0.33	6	0|0|0|1|1|0|0|0|0|0|0|0|4|3|2|3|2|1|2|2|2|1|3|2|0|0|0|0|2|0|2|1|1|1|1|0|0|0|1|0|0|0|1|0|0	0	0	0	0	0	-6.13	0.38	0.89
TLK2-529	P61604	HSPE1	2|0|2|0|0|0	4	0.67	6	0|0|0|3|2|1|0|1|1|6|7|6|1|1|1|4|4|5|1|1|1|6|7|4|4|1|1|1|4|4|3|4|4|0|0|0|0|0|0|5|6|5|1|2|1	0	0	0	0	0	-12.24	0.28	0.89
TLK2-529	P61619	SEC61A1	1|0|1|0|0|0	2	0.33	6	0|0|0|0|0|0|0|0|0|0|0|0|1|1|1|1|0|0|1|2|2|2|2|3|0|0|0|0|1|1|0|1|0|1|1|2|0|2|1|0|1|0|2|2|1	0	0	0	0	0	-5.54	0.47	0.89
TLK2-529	P61758	VBP1	6|6|8|7|5|3	35	5.83	6	0|0|0|12|14|16|1|1|1|20|19|19|1|1|0|8|10|9|0|0|0|16|13|13|14|2|1|0|14|12|18|15|17|8|7|5|6|5|7|14|12|10|9|8|9	0	0	0	0	0	-28.17	0.72	0.89
TLK2-529	P61923	COPZ1	2|0|1|0|0|0	3	0.5	6	1|1|1|11|11|11|0|0|0|7|7|9|1|0|0|10|11|8|2|2|2|6|7|5|7|0|1|1|7|7|8|8|9|4|3|3|3|2|3|5|5|5|3|2|4	0	0	0	0	0	-21.17	0.11	0.89
TLK2-529	P61956	SUMO2	1|2|1|0|2|2	8	1.33	6	0|0|0|1|2|2|0|2|0|1|2|2|0|0|0|1|1|1|1|1|1|2|1|1|1|0|0|0|1|1|1|1|1|2|1|1|1|1|1|1|1|1|1|2|3	0.02	0.03	0.02	0.03	0.02	-6.5	1.36	0.78
TLK2-529	P61962	DCAF7	2|2|3|2|3|4	16	2.67	6	3|5|2|3|2|2|2|2|3|5|7|10|0|0|0|5|5|5|2|1|1|7|5|6|7|1|5|3|11|11|11|11|11|2|0|1|1|2|2|4|2|6|4|2|3	0	0	0	0	0	-14.23	0.66	0.89
TLK2-529	P61964	WDR5	1|1|1|5|3|6	17	2.83	6	2|2|1|1|1|1|0|2|2|4|6|6|0|1|0|2|2|2|1|2|3|0|1|0|3|3|3|3|3|3|4|3|2|1|2|2|1|0|0|1|2|2|0|0|0	0.07	0.28	0.07	0.28	0.07	-7.77	1.59	0.69
TLK2-529	P61978	HNRNPK	50|55|55|60|70|79	369	61.5	6	10|12|9|72|80|81|3|10|8|42|48|48|8|6|8|30|32|26|30|28|30|30|32|30|37|6|8|8|36|30|31|33|28|76|84|99|76|86|91|74|59|71|26|28|30	0	0	0	0	0	-65.75	1.6	0.89
TLK2-529	P61981	YWHAG	4|3|3|3|3|2	18	3	6	0|0|0|5|5|3|0|2|2|7|8|8|0|0|0|0|0|0|4|3|5|3|2|3|3|0|0|0|4|3|4|4|3|5|5|4|2|4|5|3|2|3|1|2|1	0	0	0	0	0	-9.11	1.14	0.85
TLK2-529	P62070	RRAS2	1|0|1|0|0|0	2	0.33	6	0|0|0|0|1|0|0|0|0|0|0|0|0|0|0|0|0|0|1|1|1|1|2|0|0|0|0|1|0|0|0|0|0|1|2|0|1|1|1|0|0|1|0|0|1	0	0	0	0	0	-4.26	0.94	0.89
TLK2-529	P62081	RPS7	13|11|9|20|20|14	87	14.5	6	8|10|3|11|12|9|6|7|6|3|6|8|7|8|5|5|5|5|15|19|20|8|8|9|9|6|5|5|7|7|7|8|8|9|3|4|2|3|2|7|7|8|6|9|7	0.01	0.04	0.01	0.04	0.01	-15.67	1.97	0.78
TLK2-529	P62136	PPP1CA	3|4|5|1|2|1	16	2.67	6	4|3|5|5|3|3|1|2|2|5|4|5|1|0|0|3|2|2|2|4|3|5|3|4|6|1|2|2|6|7|3|4|4|5|2|3|2|2|2|4|4|3|0|1|1	0	0	0	0	0	-12.38	0.89	0.86
TLK2-529	P62140	PPP1CB	4|4|3|3|4|5	23	3.83	6	3|1|2|6|6|5|0|0|0|1|10|16|0|0|0|1|1|1|0|0|0|2|1|2|10|0|0|0|10|10|4|6|6|2|2|1|6|2|3|5|1|2|3|3|4	0	0	0	0	0	-8.75	1.25	0.85
TLK2-529	P62191	PSMC1	3|3|4|3|2|2	17	2.83	6	1|0|1|4|6|4|0|3|3|7|6|11|1|1|0|2|1|0|8|7|8|10|7|8|8|5|3|3|9|9|9|7|11|5|5|3|3|2|3|8|9|8|3|7|5	0	0	0	0	0	-18.05	0.57	0.89
TLK2-529	P62195	PSMC5	5|7|4|5|4|5	30	5	6	1|0|0|9|13|11|1|4|3|12|18|16|0|1|1|8|8|8|7|7|8|11|14|12|14|2|3|3|13|17|13|11|12|11|5|6|8|7|5|11|13|16|7|10|10	0	0	0	0	0	-26.56	0.61	0.89
TLK2-529	P62241	RPS8	5|3|4|5|5|6	28	4.67	6	8|10|11|7|8|8|10|13|10|5|7|6|6|6|7|1|2|1|15|16|19|9|8|7|5|5|4|3|4|6|4|5|5|6|6|6|6|8|8|4|7|7|4|4|5	0	0	0	0	0	-23.79	0.67	0.89
TLK2-529	P62244	RPS15A	2|4|3|1|1|1	12	2	6	14|12|11|16|15|17|8|7|5|6|4|5|7|8|7|4|4|5|9|10|9|8|7|8|3|3|4|4|4|3|5|6|5|2|2|2|1|2|3|2|4|3|9|8|8	0	0	0	0	0	-26.37	0.31	0.89
TLK2-529	P62249	RPS16	4|4|5|1|2|1	17	2.83	6	2|2|2|5|4|2|4|5|7|5|7|5|6|5|5|3|3|3|9|9|6|4|5|3|6|3|2|3|6|5|4|3|3|5|5|8|5|7|6|5|5|5|7|8|8	0	0	0	0	0	-20.2	0.58	0.88
TLK2-529	P62258	YWHAE	17|17|19|10|12|11	86	14.33	6	3|2|5|20|21|21|4|5|3|19|31|32|3|1|0|15|15|13|39|39|38|22|23|22|27|1|4|2|24|27|19|22|18|24|34|34|23|25|37|34|23|30|12|15|15	0	0	0	0	0	-55.85	0.76	0.89
TLK2-529	P62263	RPS14	5|3|5|3|5|6	27	4.5	6	14|9|12|9|8|9|7|9|9|4|3|5|11|12|10|7|7|7|14|18|17|8|8|7|4|8|6|7|5|6|6|5|6|5|3|5|2|2|3|6|6|7|6|8|8	0	0	0	0	0	-26.14	0.6	0.89
TLK2-529	P62266	RPS23	3|3|0|1|1|1	9	1.5	6	6|5|5|4|3|5|6|8|8|3|6|6|2|3|2|0|0|0|5|7|6|4|3|1|6|4|3|3|4|6|5|4|2|3|2|2|2|4|3|1|1|1|1|2|2	0	0	0	0	0	-17.25	0.42	0.89
TLK2-529	P62280	RPS11	3|3|2|0|0|0	8	1.33	6	5|6|7|7|6|6|3|4|3|1|3|2|10|8|11|4|3|5|10|9|12|5|6|5|2|1|3|3|2|3|2|4|2|2|3|0|0|1|2|2|3|3|2|6|6	0	0	0	0	0	-20.32	0.31	0.89
TLK2-529	P62304	SNRPE	2|2|2|2|1|1	10	1.67	6	0|0|0|5|5|4|0|0|0|3|3|2|1|1|1|2|2|2|1|1|1|1|1|1|2|1|1|1|2|1|2|2|1|4|1|1|2|1|2|3|2|3|2|1|1	0	0	0	0	0	-7.21	1.03	0.83
TLK2-529	P62306	SNRPF	4|4|4|1|4|3	20	3.33	6	1|2|1|5|11|11|0|0|1|3|3|1|1|1|1|1|1|1|3|2|4|3|2|2|3|3|2|1|3|4|4|3|2|2|3|7|0|14|12|16|12|11|2|2|2	0	0	0	0	0	-15.01	0.89	0.87
TLK2-529	P62308	SNRPG	1|1|1|1|1|1	6	1	6	0|1|0|2|3|3|0|1|1|1|1|3|0|0|0|0|0|0|1|1|1|1|1|1|1|0|0|0|1|2|2|2|2|2|1|0|0|0|0|0|0|0|0|0|0	0	0	0	0	0	-4.24	1.29	0.89
TLK2-529	P62310	LSM3	1|0|1|0|0|0	2	0.33	6	0|0|0|0|0|1|0|0|0|1|1|1|0|0|0|1|1|0|0|1|1|0|1|1|1|0|0|0|1|1|0|0|0|1|1|0|1|1|0|0|0|0|0|1|1	0	0	0	0	0	-4.5	0.79	0.89
TLK2-529	P62312	LSM6	1|2|0|0|0|0	3	0.5	6	0|0|0|2|2|2|0|0|0|2|1|2|0|0|0|0|1|1|1|1|1|2|3|1|2|0|0|0|1|2|0|3|2|0|1|1|1|1|0|1|1|1|0|0|0	0.01	0.04	0.01	0.04	0.01	-6.1	0.58	0.8
TLK2-529	P62314	SNRPD1	6|6|5|7|9|9	42	7	6	1|2|2|7|7|8|0|1|0|8|17|19|2|1|0|7|7|6|5|5|4|6|9|6|11|0|3|2|10|10|9|11|11|5|4|1|2|2|2|8|8|10|5|6|4	0	0	0	0	0	-15.12	1.24	0.87
TLK2-529	P62316	SNRPD2	11|12|10|7|6|7	53	8.83	6	5|5|2|7|7|8|2|3|2|6|6|9|1|2|1|1|3|2|5|5|5|3|3|2|5|2|3|2|5|7|5|6|5|14|4|6|5|7|5|7|8|8|3|7|4	0.01	0.04	0.01	0.04	0.01	-10.82	1.87	0.8
TLK2-529	P62318	SNRPD3	2|2|2|4|4|4	18	3	6	2|2|1|7|9|9|1|2|2|4|8|8|3|1|1|4|4|5|6|5|6|2|2|3|9|3|2|3|8|6|3|3|3|3|3|2|3|3|3|6|4|8|3|2|2	0	0	0	0	0	-14.26	0.75	0.88
TLK2-529	P62333	PSMC6	2|1|2|3|1|4	13	2.17	6	0|2|0|3|3|5|1|0|0|5|4|7|0|0|0|1|0|0|10|9|9|8|5|5|7|1|3|1|7|5|4|7|6|2|2|3|2|3|3|4|6|4|3|6|4	0	0	0	0	0	-14.44	0.61	0.87
TLK2-529	P62380	TBPL1	7|9|9|4|5|6	40	6.67	6	1|2|1|7|6|6|0|0|0|7|8|5|0|0|0|0|0|0|1|0|0|5|4|4|6|0|0|1|8|8|4|3|4|4|3|2|3|2|4|3|1|3|2|2|2	0.08	0.2	0.08	0.2	0.08	-6.33	2.46	0.67
TLK2-529	P62424	RPL7A	6|5|5|4|2|2	24	4	6	6|9|9|3|5|4|6|7|7|2|2|3|4|4|3|1|3|3|7|7|8|6|5|6|4|3|5|3|3|3|2|3|2|5|2|3|0|1|1|3|2|3|3|4|4	0	0	0	0	0	-14.33	1.01	0.87
TLK2-529	P62495	ETF1	4|2|1|1|1|2	11	1.83	6	3|2|3|21|20|21|0|0|0|2|2|4|0|0|0|4|5|3|10|8|7|7|4|6|7|0|1|1|8|6|5|4|5|21|20|12|16|13|15|3|2|2|16|15|15	0	0	0	0	0	-28.69	0.26	0.89
TLK2-529	P62701	RPS4X	5|6|10|3|4|4	32	5.33	6	7|7|6|12|8|7|10|8|5|5|7|7|9|10|9|5|4|4|23|23|23|12|10|9|11|5|4|4|12|12|10|11|11|15|14|15|5|6|6|8|9|11|9|13|13	0	0	0	0	0	-34.71	0.55	0.89
TLK2-529	P62750	RPL23A	3|2|3|1|2|2	13	2.17	6	5|5|6|11|10|12|2|4|5|4|5|6|3|3|3|1|1|1|9|10|11|7|7|7|5|3|2|3|4|5|5|6|5|6|6|4|4|5|5|3|4|6|2|3|3	0	0	0	0	0	-20.74	0.43	0.89
TLK2-529	P62753	RPS6	2|2|3|3|2|3	15	2.5	6	3|5|4|6|6|6|8|8|12|8|4|4|4|4|4|1|2|2|12|12|14|4|6|4|2|2|1|1|2|2|2|2|2|4|5|4|3|2|2|3|2|3|2|4|3	0	0	0	0	0	-15.49	0.57	0.89
TLK2-529	P62805	H4C1; H4C2; H4C3; H4C4; H4C5; H4C6; H4C8; H4C9; H4C11; H4C12; H4C13; H4C14; H4C15; H4-16	44|41|36|162|166|163	612	102	6	31|27|29|21|16|20|53|56|52|84|161|133|4|6|7|4|4|3|68|120|136|12|10|9|91|14|12|13|70|78|42|33|51|58|40|45|119|119|118|153|207|216|27|31|26	0	0	0	0	0	-159.21	1.75	0.89
TLK2-529	P62820	RAB1A	1|1|1|0|0|0	3	0.5	6	0|0|0|0|1|1|0|0|0|0|0|0|1|1|1|0|1|0|0|0|0|1|0|0|0|0|0|0|0|0|0|0|0|0|0|0|0|1|0|0|0|0|0|0|0	0	0	0	0	0	-3.62	2.81	0.89
TLK2-529	P62826	RAN	3|5|5|6|6|7	32	5.33	6	21|22|20|19|20|20|5|10|11|46|50|52|12|9|11|17|16|18|19|21|18|17|20|20|29|6|4|5|31|28|28|22|23|4|5|4|4|9|6|32|32|32|14|10|9	0	0	0	0	0	-71.53	0.29	0.89
TLK2-529	P62829	RPL23	4|3|2|2|2|2	15	2.5	6	18|20|17|9|9|8|8|13|10|5|6|3|13|9|10|6|6|7|16|32|33|4|6|4|2|8|5|6|3|2|2|3|2|2|4|2|2|2|2|2|1|0|2|4|4	0	0	0	0	0	-27.2	0.34	0.89
TLK2-529	P62841	RPS15	2|2|2|0|0|1	7	1.17	6	0|0|0|4|4|4|0|0|0|4|3|5|2|2|1|6|7|5|7|3|7|9|5|5|4|0|2|1|5|4|6|4|4|5|2|1|1|5|8|0|0|0|1|1|1	0	0	0	0	0	-14.92	0.38	0.89
TLK2-529	P62847	RPS24	2|2|3|1|2|3	13	2.17	6	3|4|2|3|3|2|7|9|8|3|4|5|4|6|6|1|2|2|9|9|9|6|7|5|3|3|3|3|3|4|4|5|4|8|4|1|3|5|4|3|4|4|3|4|4	0	0	0	0	0	-18.22	0.49	0.89
TLK2-529	P62851	RPS25	1|1|2|2|2|2	10	1.67	6	0|0|1|5|4|5|2|5|4|3|4|4|2|2|2|1|0|1|2|2|1|3|3|3|4|0|0|0|3|3|2|3|3|2|2|4|4|3|3|4|2|2|2|2|2	0	0	0	0	0	-10.17	0.69	0.89
TLK2-529	P62854	RPS26	1|1|2|1|1|1	7	1.17	6	1|1|0|6|4|4|1|2|2|4|4|4|3|3|3|1|1|1|5|7|7|3|3|3|2|1|1|2|2|2|2|2|2|3|4|4|3|4|4|2|2|2|2|2|2	0	0	0	0	0	-11.4	0.43	0.89
TLK2-529	P62857	RPS28	1|1|1|1|1|1	6	1	6	1|2|2|5|5|4|0|2|2|0|1|1|1|1|1|0|1|1|3|3|3|2|2|2|2|0|0|1|2|3|2|1|2|2|1|3|0|4|1|1|2|2|2|2|1	0	0	0	0	0	-7.69	0.57	0.89
TLK2-529	P62861	FAU	1|1|1|1|2|1	7	1.17	6	2|2|2|2|2|2|2|3|3|1|1|1|2|2|2|1|1|1|1|1|1|2|5|3|1|1|1|1|1|0|2|1|1|1|2|2|2|2|2|1|1|1|1|1|1	0	0	0	0	0	-7.05	0.74	0.85
TLK2-529	P62873	GNB1	3|3|2|0|0|0	8	1.33	6	0|2|1|6|5|4|0|0|0|0|0|0|0|0|0|0|0|0|2|3|2|1|0|0|2|0|0|0|1|2|1|0|0|4|1|2|1|1|1|1|1|2|2|2|3	0.02	0.06	0.02	0.06	0.02	-7.01	1.13	0.76
TLK2-529	P62875	POLR2L	1|0|1|1|2|2	7	1.17	6	0|0|0|1|0|1|0|0|0|0|1|2|0|0|0|0|0|0|1|0|0|1|1|1|0|0|0|0|0|1|2|2|1|0|0|0|1|1|1|0|1|1|1|1|0	0.05	0.14	0.05	0.14	0.05	-4.74	2.39	0.71
TLK2-529	P62899	RPL31	2|2|2|1|1|1	9	1.5	6	5|4|4|3|3|2|2|5|5|1|2|2|1|1|2|1|0|0|3|3|4|3|1|1|2|1|2|3|2|2|1|1|1|3|2|1|1|1|1|2|2|2|1|0|1	0	0	0	0	0	-8.47	0.75	0.89
TLK2-529	P62906	RPL10A	2|2|3|1|2|2	12	2	6	7|5|9|4|4|5|5|4|5|1|1|2|3|1|0|0|0|0|7|10|10|5|7|9|5|2|3|2|4|4|3|2|4|1|0|0|0|0|0|1|2|3|4|3|6	0	0	0	0	0	-13.75	0.59	0.89
TLK2-529	P62910	RPL32	1|0|1|0|0|0	2	0.33	6	3|0|0|0|0|0|0|1|1|0|0|0|1|1|2|0|0|0|8|8|10|1|1|1|1|0|0|0|1|1|0|0|0|1|0|0|0|0|1|1|0|0|0|0|1	0	0	0	0	0	-5.7	0.33	0.89
TLK2-529	P62913	RPL11	3|3|3|2|2|2	15	2.5	6	5|5|5|4|4|4|4|5|5|4|4|3|5|6|4|5|3|3|3|4|3|7|5|5|3|2|3|3|3|3|1|1|2|3|2|2|3|3|3|2|4|3|1|3|4	0	0	0	0	0	-12.61	0.71	0.89
TLK2-529	P62917	RPL8	1|3|2|1|1|2	10	1.67	6	7|7|5|4|5|5|3|5|3|3|4|4|5|4|4|1|1|1|5|5|6|4|3|2|3|0|1|1|3|3|1|1|1|3|2|2|3|2|2|2|2|2|2|4|4	0	0	0	0	0	-12.84	0.54	0.89
TLK2-529	P62937	PPIA	5|5|6|6|2|2	26	4.33	6	1|1|1|7|9|6|1|0|2|3|4|4|6|6|3|5|4|5|10|11|11|4|4|4|4|0|0|0|6|4|5|7|5|7|7|6|5|6|6|7|6|4|6|7|5	0	0	0	0	0	-17.36	0.91	0.88
TLK2-529	P62942	FKBP1A	1|1|1|0|0|0	3	0.5	6	0|0|0|1|1|2|0|0|0|0|0|0|1|1|1|0|0|0|1|1|2|0|0|0|0|0|0|0|0|0|0|0|0|2|1|0|1|2|1|0|0|0|0|0|0	0	0	0	0	0	-4.39	1.25	0.89
TLK2-529	P62987	UBA52	7|11|12|3|4|4	41	6.83	6	5|4|4|16|21|17|2|2|3|10|19|20|6|7|5|16|21|17|4|3|3|7|13|12|17|1|3|4|13|16|15|15|16|9|11|14|1|7|7|9|18|19|4|6|4	0	0	0	0	0	-35.57	0.69	0.89
TLK2-529	P62993	GRB2	1|1|2|2|1|0	7	1.17	6	0|0|0|1|1|1|0|0|0|1|7|4|0|0|1|0|0|0|1|2|1|1|1|2|2|0|0|0|3|2|3|3|4|5|1|1|2|1|1|1|1|2|0|2|1	0	0.01	0	0.01	0	-7.64	0.89	0.82
TLK2-529	P62995	TRA2B	4|2|1|2|1|4	14	2.33	6	2|2|0|2|0|0|1|1|1|3|3|3|2|1|2|0|0|0|2|3|2|2|2|3|2|1|0|0|2|2|2|2|2|2|0|0|0|1|0|3|3|2|0|0|0	0.04	0.11	0.04	0.11	0.04	-6.25	1.72	0.73
TLK2-529	P63010	AP2B1	4|2|4|2|2|3	17	2.83	6	0|0|0|6|10|6|0|0|0|7|12|19|0|0|0|4|5|5|4|4|5|12|7|7|13|2|0|0|17|14|13|16|16|7|4|2|3|1|0|9|6|7|2|0|1	0	0	0	0	0	-19.51	0.52	0.89
TLK2-529	P63104	YWHAZ	9|15|12|7|8|9	60	10	6	2|3|4|13|16|17|4|2|2|14|16|14|4|3|3|7|5|5|18|22|23|9|10|10|15|3|3|2|13|13|12|10|8|14|13|13|14|14|14|12|8|7|8|7|8	0	0	0	0	0	-26.78	1.03	0.88
TLK2-529	P63151	PPP2R2A	12|9|9|10|15|10	65	10.83	6	2|3|2|14|12|13|3|4|3|10|21|17|3|2|1|9|5|5|4|4|5|8|5|7|13|2|3|2|13|14|15|17|15|5|5|4|7|4|5|14|15|14|6|8|8	0	0	0	0	0	-16.8	1.39	0.87
TLK2-529	P63165	SUMO1	3|3|2|0|2|3	13	2.17	6	3|2|2|1|1|1|0|1|1|3|3|3|0|0|0|0|1|0|1|2|2|3|3|0|2|2|3|2|3|2|3|4|4|1|2|0|0|2|2|0|1|0|2|2|1	0.01	0.02	0.01	0.02	0.01	-8.91	1.37	0.8
TLK2-529	P63167	DYNLL1	3|3|4|4|4|6	24	4	6	0|0|0|0|2|2|0|0|0|1|1|2|0|0|0|2|3|1|1|1|1|0|0|0|1|1|2|1|1|1|0|0|0|1|1|0|0|1|0|0|0|0|0|0|0	0.66	1	0.66	1	0.66	-0.69	6.67	0.14
TLK2-529	P63173	RPL38	10|5|10|2|1|1	29	4.83	6	1|2|1|3|7|5|4|6|6|1|1|0|9|7|5|2|2|2|9|7|10|5|6|5|1|2|2|4|1|1|1|1|2|0|2|0|0|1|2|2|2|1|6|5|6	0.04	0.13	0.04	0.13	0.04	-13.31	1.47	0.72
TLK2-529	P63208	SKP1	3|4|4|8|10|7	36	6	6	2|1|0|5|4|4|1|0|1|7|7|14|0|0|0|5|4|2|3|4|2|6|7|7|9|2|1|1|10|9|9|10|9|1|4|2|6|6|5|9|8|9|5|8|5	0	0	0	0	0	-15.19	1.26	0.85
TLK2-529	P63220	RPS21	1|0|0|0|0|0	1	0.17	6	0|0|0|3|1|2|1|2|1|2|3|4|1|1|1|0|0|1|2|2|2|1|2|3|1|1|1|1|1|1|3|2|1|1|0|0|0|0|0|2|2|1|0|2|2	0	0	0	0	0	-7.57	0.13	0.89
TLK2-529	P63241	EIF5A	8|12|11|5|5|4	45	7.5	6	1|2|1|21|26|24|2|8|6|31|46|47|6|6|2|39|32|33|9|10|8|18|22|17|34|9|6|5|32|38|30|30|28|24|14|16|23|15|19|44|47|48|13|13|16	0	0	0	0	0	-77.01	0.37	0.89
TLK2-529	P63244	RACK1	4|3|2|0|0|0	9	1.5	6	5|8|7|7|10|9|5|9|7|12|10|12|6|6|7|5|6|9|17|19|18|6|7|8|9|2|3|2|8|9|4|4|4|1|1|1|0|1|1|2|3|4|5|6|6	0	0	0	0	0	-29.74	0.23	0.89
TLK2-529	P63272	SUPT4H1	1|0|1|2|3|0	7	1.17	6	0|0|0|0|0|0|0|0|0|0|0|0|0|0|0|0|0|0|0|0|0|0|0|0|1|0|0|0|1|1|0|0|0|0|0|0|0|0|0|0|0|0|0|0|0	0.29	0.95	0.29	0.95	0.29	-3.34	11.67	0.42
TLK2-529	P63279	UBE2I	3|2|3|0|1|2	11	1.83	6	1|2|1|2|0|2|1|0|1|1|1|1|0|0|1|0|0|0|2|1|1|1|1|1|2|0|2|2|2|2|1|2|1|1|1|1|0|0|0|1|1|1|2|1|1	0.04	0.1	0.04	0.1	0.04	-6.38	1.83	0.72
TLK2-529	P63313	TMSB10	1|1|1|0|0|0	3	0.5	6	0|0|0|8|6|7|0|0|0|0|0|0|0|0|0|1|0|0|0|0|0|1|1|1|1|0|0|0|0|0|0|0|0|1|1|1|1|3|1|0|0|0|0|1|1	0	0	0	0	0	-6.18	0.62	0.89
TLK2-529	P67775	PPP2CA	2|3|2|2|2|3	14	2.33	6	0|0|0|1|0|1|1|1|1|1|2|2|0|0|0|0|0|0|5|3|5|1|1|2|4|0|2|2|3|5|3|2|2|2|5|4|3|4|3|3|4|3|4|4|4	0	0	0	0	0	-7.24	1.13	0.84
TLK2-529	P67809	YBX1	5|8|12|5|14|10	54	9	6	12|13|9|14|17|13|2|9|5|5|13|13|12|7|8|13|9|9|18|18|15|19|16|15|8|3|3|4|5|9|9|10|10|8|13|16|12|11|13|8|10|8|4|4|4	0	0	0	0	0	-32.31	0.89	0.89
TLK2-529	P67870	CSNK2B	5|3|3|3|2|4	20	3.33	6	0|1|1|3|3|3|0|2|0|5|4|6|0|0|0|1|1|1|2|3|4|4|2|3|6|1|2|1|7|7|3|2|3|3|1|1|2|2|1|4|3|2|0|0|0	0.01	0.03	0.01	0.03	0.01	-7.71	1.5	0.81
TLK2-529	P68032	ACTC1	4|5|5|4|2|3	23	3.83	6	2|1|2|8|6|6|0|0|0|5|5|3|6|7|5|2|2|2|9|7|10|6|4|6|2|0|0|0|2|2|2|3|3|1|0|0|2|1|1|4|3|3|4|3|3	0	0	0	0	0	-10.98	1.21	0.85
TLK2-529	P68036	UBE2L3	2|2|3|0|0|0	7	1.17	6	0|0|0|6|5|7|0|0|0|0|2|1|3|2|4|2|3|3|4|3|3|1|1|1|2|0|0|0|3|2|3|2|3|1|1|1|0|1|1|1|2|3|1|4|3	0	0.01	0	0.01	0	-10.19	0.62	0.84
TLK2-529	P68104	EEF1A1	27|31|24|23|23|19	147	24.5	6	22|20|19|65|97|85|19|22|18|65|96|96|20|17|14|47|49|51|53|79|83|86|79|91|97|23|18|19|91|99|57|50|61|100|113|114|80|94|97|62|90|82|25|30|30	0	0	0	0	0	-205.66	0.4	0.89
TLK2-529	P68371	TUBB4B	1|1|2|1|2|4	11	1.83	6	1|1|1|2|2|4|1|2|1|2|3|2|1|1|1|2|1|1|4|4|4|2|1|2|1|2|1|1|1|1|1|1|1|1|1|1|3|1|2|2|2|2|2|3|2	0.01	0.03	0.01	0.03	0.01	-7.61	1.06	0.81
TLK2-529	P68400	CSNK2A1	12|13|15|17|16|16	89	14.83	6	2|2|1|13|17|19|3|3|4|18|23|22|1|1|0|2|3|4|7|8|7|13|11|13|30|2|7|8|23|31|29|32|29|7|4|3|3|3|3|12|14|17|0|2|0	0	0	0	0	0	-20.22	1.46	0.88
TLK2-529	P78318	IGBP1	9|8|7|2|6|8	40	6.67	6	1|0|0|5|7|6|0|0|0|5|8|6|0|0|0|6|7|7|0|0|0|4|5|5|4|0|0|0|5|3|3|4|5|5|7|2|11|10|8|7|9|8|7|10|9	0	0.01	0	0.01	0	-14.74	1.59	0.84
TLK2-529	P78332	RBM6	5|5|5|4|7|6	32	5.33	6	0|0|0|10|6|6|0|0|0|4|7|8|0|0|0|9|10|7|1|2|2|2|3|4|7|0|0|0|6|8|4|3|7|4|2|2|3|3|3|1|1|2|0|1|0	0.01	0.02	0.01	0.02	0.01	-7.4	1.74	0.81
TLK2-529	P78344	EIF4G2	8|7|5|5|3|4	32	5.33	6	4|2|2|32|27|31|1|4|2|33|43|43|14|11|12|40|37|41|16|17|17|29|26|29|34|3|6|6|32|32|26|27|27|29|25|26|24|18|16|22|26|27|21|27|27	0	0	0	0	0	-87.26	0.24	0.89
TLK2-529	P78345	RPP38	3|0|2|3|2|3	13	2.17	6	0|0|0|1|0|2|0|0|0|1|0|0|0|0|0|0|0|0|0|0|0|0|1|2|1|0|0|0|1|1|1|2|1|2|3|1|2|3|2|0|0|0|1|1|1	0.15	0.25	0.15	0.25	0.15	-5.36	3.25	0.56
TLK2-529	P78346	RPP30	6|8|6|9|7|8	44	7.33	6	0|1|0|6|5|3|0|0|0|7|3|4|0|0|0|0|1|0|1|1|1|6|4|3|5|3|0|3|6|5|6|7|4|4|3|1|2|2|3|3|2|3|4|6|4	0.1	0.25	0.1	0.25	0.1	-4.02	2.7	0.65
TLK2-529	P78347	GTF2I	11|12|8|13|15|14	73	12.17	6	0|0|1|8|8|9|0|0|0|3|8|8|1|2|1|7|9|6|3|5|3|5|5|7|11|1|1|1|12|8|9|9|10|11|8|5|4|7|6|11|13|9|15|13|12	0	0.01	0	0.01	0	-12.46	1.99	0.83
TLK2-529	P78356	PIP4K2B	3|1|2|2|1|1	10	1.67	6	0|0|0|4|7|9|0|0|0|0|4|3|0|0|0|5|5|7|1|1|0|1|0|2|5|0|0|0|4|3|5|5|4|6|2|2|1|2|1|1|3|3|4|3|3	0	0	0	0	0	-9.62	0.71	0.86
TLK2-529	P78362	SRPK2	3|2|2|2|2|3	14	2.33	6	0|0|0|0|0|0|0|0|0|2|4|7|0|0|0|0|0|0|0|0|0|0|0|0|2|0|0|0|2|3|2|4|3|2|1|0|2|3|3|1|1|1|0|0|0	0.07	0.13	0.07	0.13	0.07	-2.97	2.44	0.68
TLK2-529	P78364	PHC1	1|1|2|0|0|1	5	0.83	6	0|0|0|0|0|1|0|0|0|0|0|1|0|0|0|1|0|1|0|0|0|0|1|1|1|0|0|0|1|2|0|1|1|0|1|1|0|0|0|1|2|2|1|1|1	0.02	0.14	0.02	0.14	0.02	-4.74	1.7	0.76
TLK2-529	P78371	CCT2	87|85|97|51|57|63	440	73.33	6	6|8|3|40|44|42|26|44|28|89|96|96|6|6|4|22|25|21|32|38|38|48|49|47|74|42|34|28|76|79|64|74|71|128|137|144|78|100|101|132|151|148|37|47|49	0	0	0	0	0	-135.5	1.24	0.89
TLK2-529	P78406	RAE1	6|9|10|10|7|7	49	8.17	6	0|0|0|10|7|10|4|3|3|10|14|10|0|1|1|9|9|9|3|5|3|8|5|8|14|1|1|3|13|13|12|12|12|8|7|6|3|5|3|10|11|12|7|7|5	0	0	0	0	0	-17.09	1.24	0.88
TLK2-529	P78417	GSTO1	4|5|4|0|1|1	15	2.5	6	0|0|0|7|10|10|0|0|0|1|1|1|0|0|0|0|0|0|2|2|3|1|1|1|1|0|0|0|1|2|1|1|1|8|5|6|2|3|2|1|1|1|5|5|5	0.02	0.05	0.02	0.05	0.02	-10.14	1.24	0.78
TLK2-529	P78527	PRKDC	9|13|6|4|6|4	42	7	6	3|2|2|2|3|2|3|4|3|8|19|18|16|10|12|6|5|3|66|67|71|16|23|17|15|12|8|11|18|13|19|17|23|10|10|6|13|11|12|28|20|18|27|27|27	0	0	0	0	0	-58.32	0.43	0.89
TLK2-529	P80303	NUCB2	1|1|1|0|0|0	3	0.5	6	0|0|0|1|0|2|0|0|0|0|0|0|0|0|0|0|0|1|1|2|2|0|0|0|2|0|0|0|1|1|0|0|0|0|1|1|2|2|2|0|0|0|2|3|4	0	0	0	0	0	-5.44	0.75	0.89
TLK2-529	P80723	BASP1	5|7|5|3|2|2	24	4	6	1|0|1|25|22|22|0|0|0|8|9|12|4|3|0|15|16|17|4|5|9|8|10|10|12|0|0|0|10|12|8|8|7|10|13|16|11|10|10|4|9|7|2|6|3	0	0	0	0	0	-29.94	0.5	0.89
TLK2-529	P82279	CRB1	1|0|0|0|0|0	1	0.17	6	0|1|0|0|0|0|0|0|0|0|0|0|0|0|0|0|0|0|0|0|0|0|0|0|0|1|0|0|0|0|0|0|0|0|0|0|0|0|0|0|0|0|0|0|0	0	0	0	0	0	-3.34	1.67	0.89
TLK2-529	P82673	MRPS35	2|1|1|1|1|1	7	1.17	6	0|0|0|0|0|0|0|0|0|0|3|0|0|0|0|0|0|0|1|2|1|0|0|0|0|0|0|0|1|0|1|1|1|0|0|0|0|1|1|0|1|1|0|0|0	0.04	0.25	0.04	0.25	0.04	-2.58	3.5	0.72
TLK2-529	P82675	MRPS5	2|1|1|1|1|0	6	1	6	0|0|0|0|0|0|0|0|0|0|0|0|0|0|0|0|0|0|1|1|0|0|1|1|1|0|0|0|1|2|1|1|0|0|0|0|1|0|0|1|0|1|0|0|0	0.05	0.3	0.05	0.3	0.05	-4.02	3.46	0.71
TLK2-529	P82930	MRPS34	1|2|2|0|0|0	5	0.83	6	0|0|0|0|1|1|0|0|0|0|2|0|0|1|1|0|0|0|3|3|4|3|1|2|2|1|1|1|2|2|2|1|3|2|0|0|0|0|0|0|1|0|1|0|0	0.01	0.04	0.01	0.04	0.01	-6.29	0.91	0.79
TLK2-529	P82979	SARNP	4|4|3|2|1|0	14	2.33	6	0|0|0|5|6|8|0|0|0|2|3|2|0|0|1|2|3|2|0|0|0|2|3|2|2|0|0|0|1|1|2|4|1|4|5|5|3|5|3|2|2|2|3|3|4	0	0.01	0	0.01	0	-10.68	1.13	0.82
TLK2-529	P83731	RPL24	4|3|3|4|3|3	20	3.33	6	7|9|6|13|13|13|6|5|7|2|2|1|3|2|3|1|0|1|7|9|8|7|4|4|4|3|3|5|4|4|2|2|2|3|3|2|3|5|6|2|2|1|3|4|3	0	0	0	0	0	-13.94	0.75	0.89
TLK2-529	P83876	TXNL4A	1|1|1|0|0|0	3	0.5	6	0|0|0|1|2|1|0|0|0|0|2|2|0|0|0|1|2|1|0|0|0|1|1|1|1|0|0|0|1|2|1|2|1|1|1|1|0|0|0|0|0|0|0|0|0	0	0	0	0	0	-5.06	0.87	0.89
TLK2-529	P83916	CBX1	1|2|1|0|0|0	4	0.67	6	1|0|1|3|3|2|0|2|0|9|8|11|0|0|0|3|3|3|4|4|4|1|1|1|6|1|1|1|4|7|6|6|6|1|1|1|0|0|0|4|3|4|1|0|2	0	0	0	0	0	-13.14	0.25	0.89
TLK2-529	P84098	RPL19	1|1|1|2|1|2	8	1.33	6	1|1|2|8|8|7|3|5|3|1|2|2|5|4|4|1|3|2|2|5|6|3|2|3|2|1|2|2|2|2|2|3|2|1|3|4|2|1|1|2|2|3|2|5|6	0	0	0	0	0	-12.28	0.45	0.89
TLK2-529	P85037	FOXK1	7|9|10|5|8|7	46	7.67	6	0|0|0|0|1|0|0|0|0|5|6|7|3|2|2|11|13|10|0|0|0|3|5|3|8|0|0|0|7|8|5|5|6|0|0|0|1|1|1|5|5|2|3|5|3	0.06	0.17	0.06	0.17	0.06	-5.86	2.54	0.69
TLK2-529	P98170	XIAP	16|16|15|9|7|8	71	11.83	6	3|4|2|29|26|26|0|0|0|4|7|6|0|0|0|6|4|5|0|1|2|4|3|6|8|1|0|0|10|4|5|5|5|9|8|11|7|11|9|3|6|6|7|13|13	0	0.01	0	0.01	0	-13.68	1.91	0.82
TLK2-529	P98175	RBM10	34|35|32|19|29|26	175	29.17	6	4|4|4|11|7|11|0|0|0|12|16|17|2|2|2|10|9|10|3|4|4|7|8|7|15|1|2|2|9|18|11|15|16|14|15|14|7|11|11|7|16|19|3|9|11	0.45	0.86	0.45	0.86	0.45	-7.71	3.45	0.29
TLK2-529	P98179	RBM3	1|2|0|0|0|0	3	0.5	6	0|0|0|0|0|0|0|0|0|0|0|1|0|0|0|0|0|0|2|1|0|1|1|1|0|0|0|0|0|0|0|0|0|0|0|0|0|0|0|0|0|0|0|0|0	0.1	0.62	0.1	0.62	0.1	-3.54	3.21	0.64
TLK2-529	P99999	CYCS	2|1|1|0|0|0	4	0.67	6	0|0|0|4|4|5|0|0|0|0|0|0|1|1|0|0|0|0|0|0|1|0|0|0|0|0|0|0|0|0|0|0|0|1|1|2|0|0|0|0|1|0|0|1|1	0.03	0.17	0.03	0.17	0.03	-4.96	1.3	0.75
TLK2-529	Q00013	MPP1	3|6|6|3|4|5	27	4.5	6	0|0|0|6|7|8|0|0|0|15|16|16|1|0|0|22|19|25|0|1|1|14|12|12|21|0|0|0|20|16|10|11|13|5|7|4|6|4|6|10|10|11|5|5|6	0	0	0	0	0	-26.13	0.59	0.89
TLK2-529	Q00056	HOXA4	1|0|0|0|0|0	1	0.17	6	0|0|0|0|0|0|0|0|0|0|0|0|0|0|0|0|0|0|0|0|0|0|0|0|0|0|0|0|0|0|0|0|0|0|0|0|0|0|0|0|0|0|0|0|0	0	0	0	0	0	-3.34	1.67	0.89
TLK2-529	Q00059	TFAM	1|1|0|1|0|1	4	0.67	6	0|0|0|0|0|0|0|0|0|0|0|0|0|0|0|0|0|0|1|1|1|0|1|0|0|0|0|0|0|0|0|0|0|1|1|1|1|2|1|1|0|2|0|0|0	0	0	0	0	0	-4.1	2.14	0.89
TLK2-529	Q00325	SLC25A3	2|3|1|2|1|1	10	1.67	6	0|0|0|2|1|1|0|3|1|1|3|1|3|4|4|1|1|3|7|4|6|2|2|1|2|2|3|2|3|2|1|0|2|1|1|2|1|1|2|2|3|2|3|4|5	0	0	0	0	0	-8.96	0.79	0.86
TLK2-529	Q00341	HDLBP	13|18|16|11|11|10	79	13.17	6	7|6|7|70|67|70|4|10|10|86|106|105|18|19|15|97|88|93|15|22|18|56|56|52|60|11|9|12|57|59|63|67|59|51|49|48|48|54|47|48|57|59|36|51|47	0	0	0	0	0	-170.25	0.28	0.89
TLK2-529	Q00403	GTF2B	1|0|1|4|4|4	14	2.33	6	0|0|0|1|3|2|0|0|0|5|5|5|0|0|0|6|7|6|0|1|0|4|4|4|6|0|0|0|6|7|3|5|4|4|1|0|0|0|0|4|3|3|0|0|0	0.01	0.01	0.01	0.01	0.01	-11.11	1.06	0.82
TLK2-529	Q00535	CDK5	2|0|2|0|0|1	5	0.83	6	0|0|0|0|0|0|0|0|0|0|0|0|0|0|1|0|0|1|2|2|2|1|1|1|2|0|0|1|2|1|2|2|1|0|1|0|0|0|0|1|0|0|0|0|0	0.04	0.12	0.04	0.12	0.04	-4.87	1.56	0.73
TLK2-529	Q00610	CLTC	4|4|0|4|1|3	16	2.67	6	0|1|0|1|1|2|5|7|6|6|14|16|5|3|1|5|4|4|52|57|53|21|25|23|16|5|7|7|16|19|17|14|15|0|0|1|1|1|0|14|16|15|8|10|9	0	0	0	0	0	-49.77	0.24	0.89
TLK2-529	Q00688	FKBP3	1|2|2|0|0|0	5	0.83	6	0|0|0|11|11|12|0|0|0|3|7|5|0|0|0|6|8|8|5|7|6|8|8|8|6|0|0|0|6|7|5|8|7|6|8|9|3|3|4|4|6|5|11|10|9	0	0	0	0	0	-23.75	0.16	0.89
TLK2-529	Q00839	HNRNPU	20|33|30|10|12|13	118	19.67	6	17|13|16|21|23|21|8|15|10|17|16|17|8|7|7|5|7|7|34|37|36|15|16|17|15|9|9|10|16|15|15|15|16|31|29|25|25|25|26|13|18|17|8|12|9	0	0	0	0	0	-47.64	1.18	0.89
TLK2-529	Q01105	SET	9|7|8|8|8|10	50	8.33	6	2|2|4|14|12|13|4|4|5|15|23|23|3|4|4|21|19|17|6|5|6|20|16|16|13|4|4|3|16|13|14|12|15|11|11|12|14|12|14|21|25|22|4|6|7	0	0	0	0	0	-32.89	0.73	0.89
TLK2-529	Q01167	FOXK2	4|6|6|5|6|4	31	5.17	6	0|0|0|1|3|3|0|1|0|2|3|2|7|3|5|2|5|5|0|1|1|3|2|2|3|4|4|5|6|5|2|4|2|4|0|2|2|2|2|1|2|2|0|1|1	0.03	0.06	0.03	0.06	0.03	-5.31	2.21	0.74
TLK2-529	Q01518	CAP1	5|6|3|3|1|0	18	3	6	1|1|1|16|19|23|0|0|1|8|25|22|2|1|2|18|17|17|4|7|4|10|8|8|17|1|2|1|15|20|15|19|16|13|13|12|5|9|8|7|15|16|5|8|5	0	0	0	0	0	-43.84	0.31	0.89
TLK2-529	Q01543	FLI1	8|5|5|4|4|5	31	5.17	6	0|0|0|1|0|0|0|0|0|0|0|0|0|0|0|2|2|2|0|0|0|0|1|0|1|0|0|0|1|1|1|1|0|0|1|0|0|1|1|0|0|0|0|0|0	0.98	1	0.98	1	0.98	2.98	14.53	0
TLK2-529	Q01581	HMGCS1	1|0|1|0|0|1	3	0.5	6	1|0|0|3|3|3|0|0|0|7|13|14|0|0|0|17|18|17|5|6|7|16|13|13|18|1|0|1|19|15|13|12|11|2|2|0|3|2|2|13|14|13|1|1|0	0	0	0	0	0	-30.15	0.08	0.89
TLK2-529	Q01658	DR1	1|1|1|2|1|1	7	1.17	6	0|0|0|2|2|1|0|0|0|0|0|0|0|0|0|1|0|0|0|0|0|0|0|0|0|0|0|0|1|1|0|1|0|1|2|1|1|1|1|1|0|1|0|0|0	0.03	0.18	0.03	0.18	0.03	-2.81	2.92	0.74
TLK2-529	Q01664	TFAP4	1|2|3|7|6|4	23	3.83	6	0|0|0|1|1|0|0|0|0|0|1|0|0|0|0|0|0|0|0|0|0|0|0|0|0|1|0|0|0|0|0|0|0|0|1|0|0|0|0|1|0|0|0|0|0	0.76	1	0.76	1	0.76	-1.24	28.75	0.09
TLK2-529	Q01780	EXOSC10	11|11|15|12|14|12	75	12.5	6	1|2|0|12|7|9|0|0|0|8|11|10|0|0|0|1|0|0|3|3|6|4|4|4|10|1|0|2|10|13|8|10|9|7|9|4|4|3|3|6|10|10|3|3|3	0.04	0.13	0.04	0.13	0.04	-4.86	2.64	0.72
TLK2-529	Q01813	PFKP	3|3|1|0|1|0	8	1.33	6	0|0|0|1|4|3|0|0|0|2|4|7|0|0|0|7|7|6|9|7|8|6|8|6|8|0|1|1|9|7|4|3|4|4|4|5|3|6|5|5|8|8|7|5|6	0	0	0	0	0	-19.77	0.32	0.89
TLK2-529	Q01844	EWSR1	3|3|3|3|4|4	20	3.33	6	0|0|0|3|3|3|0|1|0|7|3|5|3|1|2|9|6|7|4|7|5|11|10|11|5|0|0|0|5|6|6|6|5|5|5|3|4|6|8|11|8|7|4|5|3	0	0	0	0	0	-14.29	0.74	0.89
TLK2-529	Q02040	AKAP17A	3|2|1|0|0|0	6	1	6	0|0|0|0|0|0|0|0|0|0|0|0|0|0|0|0|0|0|1|0|0|0|0|0|0|0|0|0|0|0|0|0|0|1|0|0|0|0|0|0|0|0|0|0|0	0.29	0.95	0.29	0.95	0.29	-3.34	10	0.42
TLK2-529	Q02078	MEF2A	1|1|1|0|0|0	3	0.5	6	0|0|0|0|0|0|0|0|0|0|0|0|0|0|0|0|1|1|0|0|0|0|0|0|0|0|0|0|0|0|0|0|0|0|0|0|0|0|0|0|0|0|0|0|0	0	0	0	0	0	-3.34	5	0.89
TLK2-529	Q02086	SP2	2|1|0|2|1|2	8	1.33	6	0|0|0|3|3|1|0|0|0|0|3|3|0|1|1|2|2|2|0|0|1|3|1|1|1|0|0|0|1|0|0|0|0|0|0|1|0|1|1|1|2|1|0|0|0	0.03	0.06	0.03	0.06	0.03	-5.87	1.67	0.75
TLK2-529	Q02241	KIF23	3|1|1|5|5|4	19	3.17	6	0|0|0|1|1|1|0|0|0|1|3|2|0|0|0|1|0|1|2|2|3|3|2|1|3|0|0|0|1|2|0|2|0|2|2|1|1|1|1|1|1|2|0|0|1	0.24	0.53	0.24	0.53	0.24	-4.97	3.17	0.48
TLK2-529	Q02543	RPL18A	2|2|3|1|1|1	10	1.67	6	0|2|0|1|1|4|2|4|5|0|2|1|1|2|2|0|0|0|14|17|18|3|1|4|0|1|1|1|2|2|0|0|0|0|1|0|0|1|1|2|1|1|3|3|3	0	0	0	0	0	-9.24	0.7	0.86
TLK2-529	Q02790	FKBP4	4|2|4|2|2|2	16	2.67	6	0|0|0|18|11|16|0|1|0|6|12|10|1|3|3|17|16|18|13|15|16|6|7|8|12|0|2|1|9|11|4|9|12|6|10|10|7|6|6|7|9|8|12|10|11	0	0	0	0	0	-30.09	0.33	0.89
TLK2-529	Q02878	RPL6	3|2|4|2|2|3	16	2.67	6	7|7|9|7|8|9|11|16|13|6|10|10|9|9|7|1|1|3|12|14|12|10|11|12|8|4|8|5|6|8|3|4|4|8|5|5|0|3|4|2|5|6|1|6|5	0	0	0	0	0	-26.21	0.38	0.89
TLK2-529	Q02880	TOP2B	6|6|5|5|4|3	29	4.83	6	0|0|0|1|0|0|0|1|1|8|11|11|0|0|0|0|0|0|10|12|14|0|0|1|11|1|2|2|11|12|8|14|14|3|2|3|2|1|1|6|4|3|0|0|0	0	0	0	0	0	-11.24	1.28	0.85
TLK2-529	Q02952	AKAP12	2|1|1|0|3|5	12	2	6	21|25|19|28|26|28|0|0|1|11|21|21|18|14|14|29|29|26|8|12|10|19|22|17|20|17|16|13|26|26|22|21|19|19|14|11|14|17|16|17|19|17|16|23|17	0	0	0	0	0	-80.04	0.11	0.89
TLK2-529	Q02978	SLC25A11	4|4|3|3|4|4	22	3.67	6	3|2|2|3|2|4|1|3|1|0|1|0|0|4|2|0|0|0|6|5|5|4|3|2|1|2|3|3|1|1|1|1|1|1|3|2|2|3|4|3|2|2|9|8|8	0	0	0	0	0	-7.26	1.45	0.83
TLK2-529	Q03060	CREM	1|1|1|2|2|2	9	1.5	6	0|0|0|0|0|0|0|0|0|0|1|1|0|0|0|0|0|0|0|0|0|0|0|0|1|0|0|0|1|1|1|1|1|0|0|0|0|0|0|1|2|0|0|0|0	0.18	0.36	0.18	0.36	0.18	-2.25	6.14	0.53
TLK2-529	Q03111	MLLT1	8|4|5|6|6|7	36	6	6	0|0|0|1|0|1|0|0|0|0|1|1|0|0|0|1|1|2|0|0|0|1|0|0|3|0|0|0|1|1|1|3|1|2|2|0|2|0|2|0|0|1|0|0|1	0.9	1	0.9	1	0.9	0.42	9.31	0.03
TLK2-529	Q03164	KMT2A	3|10|6|2|2|4	27	4.5	6	0|0|1|1|1|1|0|0|0|2|8|8|0|0|0|1|2|2|2|2|2|2|2|4|10|4|5|2|7|7|8|10|13|0|2|0|1|0|0|0|3|1|0|0|0	0.06	0.31	0.06	0.31	0.06	-8.45	1.78	0.7
TLK2-529	Q03252	LMNB2	1|1|1|1|0|0	4	0.67	6	0|0|0|0|1|1|1|0|0|0|0|0|0|0|0|0|0|0|2|3|5|2|2|1|0|0|0|0|0|0|0|0|0|0|0|1|2|0|1|0|1|0|1|1|3	0	0	0	0	0	-5.32	1.07	0.89
TLK2-529	Q04206	RELA	2|1|0|2|3|3	11	1.83	6	1|1|1|4|6|6|2|3|3|8|9|10|1|3|3|8|10|9|2|3|2|9|5|6|11|2|4|4|9|9|8|8|12|7|4|4|4|7|4|7|9|7|5|5|6	0	0	0	0	0	-26.1	0.33	0.89
TLK2-529	Q04323	UBXN1	8|4|3|6|5|5	31	5.17	6	0|0|0|7|11|9|1|2|1|6|10|14|1|1|2|10|9|10|3|3|2|8|9|9|12|2|3|4|15|13|13|13|12|6|4|2|7|7|9|7|12|10|5|6|5	0	0	0	0	0	-22.06	0.79	0.88
TLK2-529	Q04637	EIF4G1	15|15|14|9|10|10	73	12.17	6	20|25|25|67|65|61|6|11|7|52|76|65|18|15|17|60|48|55|21|20|19|43|44|42|61|6|14|16|46|50|45|51|52|41|47|53|32|35|32|32|45|45|31|46|44	0	0	0	0	0	-137.17	0.32	0.89
TLK2-529	Q04724	TLE1	1|2|1|1|2|3	10	1.67	6	0|0|0|1|1|2|0|0|0|0|0|0|0|0|0|1|1|0|0|0|0|1|1|0|0|0|0|0|2|1|1|1|1|1|0|1|1|1|1|1|1|1|0|1|0	0.11	0.37	0.11	0.37	0.11	-3.21	3.26	0.63
TLK2-529	Q04726	TLE3	7|6|6|7|6|8	40	6.67	6	0|0|0|2|3|3|0|0|0|3|4|3|0|0|0|6|5|4|0|1|0|1|2|4|2|1|1|1|3|4|2|2|2|4|3|4|4|6|4|3|4|3|2|3|3	0.17	0.43	0.17	0.43	0.17	-2.56	2.94	0.53
TLK2-529	Q04760	GLO1	3|4|4|2|2|2	17	2.83	6	0|0|0|14|15|12|0|0|1|13|16|14|5|4|3|18|17|15|9|13|10|14|11|15|15|4|3|4|13|13|10|11|9|4|4|3|3|4|3|18|21|20|6|8|8	0	0	0	0	0	-34.13	0.32	0.89
TLK2-529	Q04917	YWHAH	7|5|4|1|1|1	19	3.17	6	0|0|0|1|4|3|0|0|0|3|4|5|0|0|0|0|0|0|7|9|8|2|2|2|5|0|1|0|4|7|2|2|2|4|4|3|1|2|2|8|3|3|2|1|1	0.02	0.1	0.02	0.1	0.02	-9.68	1.33	0.77
TLK2-529	Q05048	CSTF1	6|5|3|4|5|6	29	4.83	6	0|0|0|0|0|0|0|0|0|2|3|4|0|0|0|0|0|0|2|2|3|4|4|3|5|0|0|0|6|7|5|5|6|2|1|1|1|2|1|0|0|0|1|0|0	0.15	0.25	0.15	0.25	0.15	-3.68	3.11	0.57
TLK2-529	Q05086	UBE3A	1|0|0|0|0|0	1	0.17	6	0|0|0|1|0|0|0|0|0|1|1|1|0|0|0|3|3|4|0|0|0|0|0|0|1|0|0|0|4|1|0|0|0|1|0|2|1|2|1|1|0|1|0|0|0	0	0	0	0	0	-5.4	0.26	0.89
TLK2-529	Q05209	PTPN12	1|1|0|1|0|0	3	0.5	6	0|1|1|3|3|3|0|0|0|5|4|7|1|0|0|4|7|5|0|0|0|2|3|3|5|0|0|0|5|6|5|2|3|4|4|4|6|4|4|5|6|3|1|1|2	0	0	0	0	0	-13.59	0.18	0.89
TLK2-529	Q05519	SRSF11	15|12|14|12|13|12	78	13	6	4|1|3|9|14|14|0|1|1|3|4|5|2|3|2|3|4|4|2|3|3|7|5|7|6|1|1|1|5|4|5|4|5|10|7|5|10|9|8|3|6|5|4|8|8	0.06	0.17	0.06	0.17	0.06	-4.15	2.67	0.7
TLK2-529	Q05655	PRKCD	1|0|0|0|0|0	1	0.17	6	0|0|0|2|3|2|0|0|0|0|0|0|0|0|0|1|1|0|0|0|0|0|0|0|0|0|0|0|0|0|0|0|1|2|2|4|4|3|4|0|0|0|1|1|2	0	0	0	0	0	-5.77	0.23	0.89
TLK2-529	Q05682	CALD1	7|7|5|3|5|6	33	5.5	6	5|5|3|19|21|22|0|1|0|12|23|23|4|4|4|33|29|33|0|0|0|9|8|12|13|0|0|0|12|12|10|11|13|16|15|14|9|11|9|7|10|10|13|12|11	0	0	0	0	0	-38.23	0.52	0.89
TLK2-529	Q06124	PTPN11	20|16|15|10|8|6	75	12.5	6	1|2|2|62|63|64|0|0|0|28|25|30|2|1|1|26|25|22|2|4|6|27|29|26|29|1|0|1|29|31|23|24|23|22|23|33|21|24|17|25|24|26|22|28|24	0	0	0	0	0	-69.28	0.63	0.89
TLK2-529	Q06190	PPP2R3A	2|1|1|0|0|0	4	0.67	6	0|0|0|0|1|0|0|0|0|0|0|1|0|1|0|0|0|0|0|0|0|0|0|0|0|0|0|0|0|0|0|0|0|0|1|0|0|1|1|1|0|0|0|0|0	0.1	0.6	0.1	0.6	0.1	-3.54	4.29	0.64
TLK2-529	Q06203	PPAT	1|1|1|0|1|1	5	0.83	6	0|0|0|6|5|5|0|0|0|5|9|9|0|0|0|5|3|4|1|2|1|7|7|7|5|0|0|0|5|5|5|7|6|4|1|3|2|2|1|3|4|6|4|4|4	0	0	0	0	0	-15.8	0.26	0.89
TLK2-529	Q06265	EXOSC9	3|4|3|4|4|4	22	3.67	6	1|1|0|2|2|2|0|1|1|5|2|2|0|0|0|0|1|0|1|2|3|3|4|2|2|1|1|1|2|2|2|4|4|1|1|0|1|1|2|4|4|5|1|1|1	0.03	0.04	0.03	0.04	0.03	-4.55	2.17	0.74
TLK2-529	Q06323	PSME1	1|2|3|1|0|1	8	1.33	6	0|0|0|5|8|8|0|0|0|6|11|10|1|0|0|9|8|7|0|0|1|8|7|8|9|0|0|0|5|6|5|6|5|2|5|3|4|6|3|10|11|7|4|2|5	0	0	0	0	0	-20.32	0.31	0.89
TLK2-529	Q06330	RBPJ	2|1|1|3|1|1	9	1.5	6	0|0|0|0|0|0|0|0|0|5|6|6|0|0|0|1|2|2|0|0|0|3|1|1|6|0|0|0|7|8|5|8|8|0|0|1|0|0|0|4|3|1|0|0|2	0	0.01	0	0.01	0	-7.5	0.84	0.83
TLK2-529	Q06546	GABPA	11|11|13|7|11|12	65	10.83	6	0|0|0|5|8|2|0|0|0|5|4|6|0|0|0|7|8|7|0|1|0|5|4|6|6|0|0|1|6|7|9|7|7|3|1|2|2|2|1|9|7|7|3|4|4	0.19	0.39	0.19	0.39	0.19	-5.16	3.12	0.52
TLK2-529	Q06587	RING1	3|3|3|2|3|3	17	2.83	6	0|0|0|2|1|1|0|2|0|1|1|3|0|0|0|1|2|3|0|2|2|3|2|2|1|1|0|0|2|2|2|4|2|2|2|3|0|2|2|2|2|2|0|1|1	0.03	0.03	0.03	0.03	0.03	-4.76	2.09	0.75
TLK2-529	Q06830	PRDX1	9|10|11|4|6|8	48	8	6	11|13|12|39|37|44|12|17|18|44|38|36|8|9|9|29|28|29|11|14|12|23|23|22|20|9|8|9|20|21|18|17|17|20|15|21|20|18|20|31|31|27|15|13|15	0	0	0	0	0	-77.56	0.39	0.89
TLK2-529	Q07020	RPL18	5|2|3|2|4|2	18	3	6	2|3|4|2|2|3|5|8|8|2|2|3|3|3|4|0|0|1|8|8|8|4|3|4|2|2|1|2|1|1|1|0|1|3|4|4|1|1|1|2|2|2|0|0|0	0	0.01	0	0.01	0	-9.35	1.12	0.84
TLK2-529	Q07021	C1QBP	4|5|4|4|5|6	28	4.67	6	10|8|8|15|16|14|4|3|4|6|7|11|5|6|4|5|3|5|9|11|12|21|18|17|6|3|4|5|6|6|6|6|6|6|3|2|10|9|10|7|7|4|5|5|4	0	0	0	0	0	-24.24	0.61	0.89
TLK2-529	Q07065	CKAP4	9|7|9|6|4|4	39	6.5	6	5|8|5|15|13|12|6|9|6|6|8|12|6|6|6|1|0|3|17|19|16|9|7|8|8|14|14|14|9|9|11|12|10|11|12|6|8|8|10|5|7|8|9|14|12	0	0	0	0	0	-30.72	0.71	0.89
TLK2-529	Q07157	TJP1	3|2|2|0|0|0	7	1.17	6	6|7|7|18|20|19|3|5|5|29|38|47|12|12|15|55|58|50|8|13|15|35|37|33|44|12|16|15|37|45|42|39|38|10|7|9|7|10|8|26|32|30|10|19|13	0	0	0	0	0	-100.94	0.05	0.89
TLK2-529	Q07666	KHDRBS1	13|16|16|9|7|6	67	11.17	6	0|1|0|15|14|15|2|3|2|6|12|13|2|3|2|12|16|13|7|13|12|23|18|20|8|4|3|2|19|9|19|10|9|9|9|5|0|3|3|8|10|13|3|6|5	0	0	0	0	0	-23.65	1.32	0.88
TLK2-529	Q07955	SRSF1	3|5|3|0|2|1	14	2.33	6	2|1|2|1|2|3|0|0|0|0|0|0|0|0|0|0|0|0|15|16|20|3|2|2|0|0|0|0|0|0|0|0|0|1|0|3|3|3|4|3|5|3|0|1|1	0.01	0.06	0.01	0.06	0.01	-10.24	1.09	0.79
TLK2-529	Q08050	FOXM1	1|0|0|0|0|0	1	0.17	6	0|0|0|0|0|0|0|0|0|0|0|0|0|0|0|0|0|1|0|0|0|0|0|0|0|0|0|0|0|0|0|0|0|0|0|0|0|0|0|0|0|0|0|0|0	0	0	0	0	0	-3.34	1.67	0.89
TLK2-529	Q08209	PPP3CA	1|1|0|0|0|0	2	0.33	6	1|1|1|3|5|5|1|0|0|1|2|2|0|0|0|0|0|0|1|1|1|4|3|3|2|1|1|1|2|3|2|2|2|4|1|3|1|0|1|0|1|0|2|2|2	0	0	0	0	0	-8.64	0.22	0.89
TLK2-529	Q08211	DHX9	40|43|44|38|43|42	250	41.67	6	6|9|9|12|15|13|11|14|14|48|70|58|3|5|4|15|18|18|59|64|65|29|33|35|53|8|10|11|56|52|49|55|59|27|22|26|17|25|21|42|47|41|10|11|11	0	0	0	0	0	-47.9	1.46	0.89
TLK2-529	Q08378	GOLGA3	1|1|1|0|1|0	4	0.67	6	0|0|0|1|1|0|0|0|0|0|1|1|0|0|0|1|1|1|0|1|1|1|1|1|2|0|0|0|1|2|1|0|1|1|1|1|0|0|1|0|1|0|1|1|1	0	0	0	0	0	-5.14	1.11	0.89
TLK2-529	Q08752	PPID	1|0|1|0|0|0	2	0.33	6	0|0|0|4|5|5|0|0|0|3|4|4|0|0|0|5|3|5|0|2|0|4|1|0|7|0|0|0|5|6|3|3|0|3|3|2|0|0|0|2|2|2|5|3|2	0	0	0	0	0	-10.6	0.16	0.89
TLK2-529	Q08945	SSRP1	17|14|16|23|23|22	115	19.17	6	1|1|1|2|2|1|1|1|2|10|14|14|0|0|0|4|2|3|22|23|25|4|5|5|20|2|2|2|19|23|14|12|15|10|10|10|14|15|12|15|12|12|0|0|1	0.01	0.02	0.01	0.02	0.01	-11.29	2.38	0.81
TLK2-529	Q08J23	NSUN2	20|23|22|13|13|16	107	17.83	6	0|1|1|17|15|15|2|9|6|21|29|31|8|10|11|32|33|34|16|18|26|25|22|26|23|8|12|12|24|27|25|24|24|13|18|17|13|14|11|17|22|21|13|13|15	0	0	0	0	0	-44.41	1.04	0.89
TLK2-529	Q09028	RBBP4	11|18|9|13|12|16	79	13.17	6	5|5|6|8|8|8|4|9|6|20|24|21|0|0|0|5|5|6|7|8|5|13|11|9|13|6|8|7|19|17|17|17|16|6|2|4|4|5|4|10|17|12|3|6|4	0	0	0	0	0	-19.78	1.52	0.87
TLK2-529	Q09161	NCBP1	15|13|17|15|14|16	90	15	6	1|1|2|1|2|3|0|0|0|1|5|3|0|0|0|0|0|0|4|4|6|5|4|5|7|0|0|0|7|6|6|8|8|8|3|5|6|5|3|3|3|4|1|2|3	0.81	0.92	0.81	0.92	0.81	0.64	5	0.06
TLK2-529	Q09666	AHNAK	58|45|48|45|40|44	280	46.67	6	507|529|428|299|300|288|151|243|219|218|265|282|326|328|315|230|228|217|165|157|170|199|207|201|173|254|250|251|175|185|238|233|226|188|202|211|217|256|233|159|156|151|215|269|262	0	0	0	0	0	#NAME?	0.19	0.89
TLK2-529	Q0PNE2	ELP6	2|1|2|1|1|1	8	1.33	6	3|4|2|4|5|4|0|0|0|1|1|3|0|0|0|1|1|0|0|0|0|1|1|0|3|0|0|0|2|3|1|2|3|4|0|2|1|0|2|2|3|2|2|2|2	0	0.01	0	0.01	0	-6.7	0.9	0.84
TLK2-529	Q10567	AP1B1	1|0|1|1|1|1	5	0.83	6	0|0|0|0|2|4|0|0|0|7|18|14|0|0|0|7|4|6|4|7|6|6|8|5|12|0|0|0|11|11|7|9|11|7|3|2|3|3|2|4|3|3|1|1|1	0	0	0	0	0	-19.82	0.2	0.89
TLK2-529	Q10570	CPSF1	19|23|20|17|20|24	123	20.5	6	6|6|6|5|10|8|3|6|3|10|14|17|3|1|2|6|7|5|7|6|6|15|10|13|14|4|7|7|15|14|10|16|12|5|6|3|7|6|7|12|11|12|4|2|5	0.05	0.18	0.05	0.18	0.05	-7.68	2.61	0.71
TLK2-529	Q12756	KIF1A	1|0|0|0|0|0	1	0.17	6	0|0|0|0|1|1|0|0|0|0|0|0|0|0|0|5|1|2|0|0|0|0|0|0|0|0|0|0|1|0|0|0|0|0|1|0|2|2|2|0|0|0|0|1|0	0	0	0	0	0	-4.59	0.39	0.89
TLK2-529	Q12789	GTF3C1	9|11|11|10|11|9	61	10.17	6	1|2|2|4|5|5|0|0|0|3|7|7|0|1|0|10|9|11|1|3|2|5|6|6|14|1|5|5|9|11|12|11|8|4|2|3|2|2|4|8|7|11|0|4|6	0	0.01	0	0.01	0	-7.21	2.09	0.82
TLK2-529	Q12792	TWF1	2|2|1|1|1|1	8	1.33	6	1|0|0|20|21|19|0|0|0|9|7|9|0|1|0|18|13|12|5|6|6|6|8|7|9|0|0|0|9|8|8|6|10|7|6|4|7|7|5|7|7|6|5|5|4	0	0	0	0	0	-25.96	0.21	0.89
TLK2-529	Q12800	TFCP2	6|10|5|7|5|5	38	6.33	6	1|0|1|8|7|8|0|0|0|5|6|8|0|0|0|9|8|10|3|1|2|4|4|4|8|0|0|0|9|7|5|7|6|5|7|12|5|2|4|5|9|9|6|6|3	0	0.01	0	0.01	0	-11.23	1.4	0.85
TLK2-529	Q12824	SMARCB1	3|3|3|3|4|2	18	3	6	1|0|0|1|0|0|0|0|0|0|2|1|0|0|0|0|0|0|3|3|3|2|1|2|1|0|0|0|1|0|1|0|0|2|1|1|2|1|1|3|2|3|0|0|1	0.16	0.35	0.16	0.35	0.16	-3.06	3.46	0.55
TLK2-529	Q12830	BPTF	8|7|8|15|16|18	72	12	6	0|1|2|0|0|0|1|1|1|1|5|4|1|2|1|0|0|0|3|3|3|2|2|3|5|8|7|11|7|6|8|7|6|3|2|2|5|5|3|3|3|3|0|1|1	0.46	0.94	0.46	0.94	0.46	-3.63	4.09	0.28
TLK2-529	Q12857	NFIA	1|2|2|4|2|3	14	2.33	6	0|0|0|0|0|0|0|0|0|0|0|0|0|0|0|0|0|0|0|0|0|0|0|0|0|0|0|0|0|0|0|0|0|0|0|0|0|1|0|0|0|0|0|0|0	0.71	0.99	0.71	0.99	0.71	-0.83	23.33	0.12
TLK2-529	Q12872	SFSWAP	7|10|6|3|9|4	39	6.5	6	0|0|0|1|0|0|0|0|0|1|3|6|1|0|0|5|4|3|1|0|0|2|3|3|3|0|0|0|4|3|3|3|3|2|1|0|2|5|2|3|1|3|0|2|0	0.4	0.86	0.4	0.86	0.4	-4.13	4.01	0.33
TLK2-529	Q12873	CHD3	3|4|5|3|3|2	20	3.33	6	0|0|0|0|0|0|0|0|0|0|0|0|0|0|0|0|0|0|0|0|0|0|0|0|0|1|0|1|2|1|0|1|2|1|0|0|2|1|2|0|1|1|0|0|0	0.65	0.98	0.65	0.98	0.65	-1.19	9.38	0.15
TLK2-529	Q12874	SF3A3	14|13|15|14|14|12	82	13.67	6	3|2|3|6|9|6|1|2|2|12|15|18|0|0|0|5|7|4|7|6|8|9|9|7|13|4|5|5|13|15|17|17|17|11|8|10|9|9|9|11|14|13|8|11|8	0	0	0	0	0	-14.22	1.67	0.88
TLK2-529	Q12888	TP53BP1	2|1|1|1|5|4	14	2.33	6	0|0|0|0|2|0|0|0|0|0|0|0|0|0|0|1|0|1|0|1|2|1|1|1|0|1|0|1|0|0|1|0|0|1|0|1|0|2|2|2|0|1|0|1|0	0.29	0.91	0.29	0.91	0.29	-3.21	4.57	0.42
TLK2-529	Q12905	ILF2	24|23|27|29|23|21	147	24.5	6	5|5|3|8|8|3|2|4|3|19|24|29|0|0|0|0|0|0|21|24|24|15|12|11|21|5|3|4|16|16|17|15|17|15|17|20|30|28|31|23|19|22|5|3|3	0	0	0	0	0	-16.45	2	0.87
TLK2-529	Q12906	ILF3	22|16|26|21|30|26	141	23.5	6	4|5|5|4|2|5|1|1|1|11|16|15|1|2|1|0|0|0|23|22|26|12|13|12|20|1|2|2|22|20|21|20|18|22|17|14|34|22|31|28|22|21|0|2|1	0	0	0	0	0	-20.02	2.03	0.86
TLK2-529	Q12931	TRAP1	2|2|3|3|2|3	15	2.5	6	3|4|3|3|2|2|2|4|2|2|3|5|1|1|2|1|1|1|20|18|22|12|11|10|5|4|4|5|6|5|6|8|9|1|1|3|2|4|2|8|3|9|4|4|6	0	0	0	0	0	-18.47	0.48	0.89
TLK2-529	Q12962	TAF10	1|1|1|1|2|2	8	1.33	6	0|0|0|0|0|0|0|0|0|0|0|0|0|0|0|0|0|0|0|0|0|0|0|0|0|0|0|0|0|0|0|0|0|0|0|0|1|1|1|2|0|1|0|0|0	0.22	0.67	0.22	0.67	0.22	-1.25	10	0.49
TLK2-529	Q12972	PPP1R8	1|1|1|2|1|3	9	1.5	6	0|0|0|6|6|4|0|0|0|4|6|6|0|0|0|4|4|4|0|0|0|5|5|6|10|0|0|0|8|3|4|2|4|3|4|3|3|2|3|2|2|2|3|2|3	0	0	0	0	0	-11.2	0.55	0.87
TLK2-529	Q12996	CSTF3	14|12|14|11|11|12	74	12.33	6	0|0|0|5|4|3|0|2|1|8|15|10|0|0|0|5|3|4|1|2|1|8|7|7|8|0|0|0|6|6|4|7|7|5|6|7|2|2|4|7|4|4|5|3|5	0.16	0.32	0.16	0.32	0.16	-2.83	3.12	0.55
TLK2-529	Q13011	ECH1	2|3|4|5|2|3	19	3.17	6	13|15|12|0|0|0|8|12|14|0|0|0|1|1|0|0|0|0|6|6|4|0|0|0|0|13|8|8|0|0|0|0|1|0|0|0|0|0|1|0|0|0|0|0|0	0	0.01	0	0.01	0	-8.95	1.16	0.83
TLK2-529	Q13042	CDC16	2|2|1|2|2|3	12	2	6	0|1|0|1|1|1|0|0|0|3|2|2|0|0|0|0|0|0|3|2|3|0|2|1|2|2|1|1|2|1|4|4|3|2|4|0|0|3|2|4|2|1|1|1|1	0.01	0.03	0.01	0.03	0.01	-6.43	1.43	0.8
TLK2-529	Q13043	STK4	2|2|2|2|0|0	8	1.33	6	0|0|0|2|3|2|0|0|0|3|12|7|0|0|0|5|4|4|0|0|0|4|3|2|7|1|0|0|5|6|5|6|6|2|3|4|1|3|2|4|3|4|3|6|5	0	0	0	0	0	-13.97	0.47	0.89
TLK2-529	Q13085	ACACA	279|272|266|381|365|346	1909	318.17	6	893|1104|774|57|55|56|1388|1651|1426|61|83|93|1679|1507|1415|93|86|84|362|377|362|19|15|15|63|1619|1363|1248|60|67|47|49|56|41|33|39|37|37|41|56|52|55|32|36|37	0	0	0	0	0	#NAME?	0.76	0.89
TLK2-529	Q13098	GPS1	3|8|11|1|2|2	27	4.5	6	1|1|1|4|2|2|0|0|1|8|11|12|0|0|0|0|1|1|0|3|3|5|5|5|10|0|1|1|11|13|6|8|8|6|4|5|6|4|2|7|8|9|2|4|5	0.01	0.03	0.01	0.03	0.01	-16.53	1.09	0.81
TLK2-529	Q13111	CHAF1A	4|3|7|3|3|3	23	3.83	6	0|0|0|1|0|0|0|0|0|4|7|10|0|0|0|3|4|4|1|2|1|1|0|1|6|0|0|2|4|5|4|7|4|1|2|2|2|1|1|2|4|3|0|0|0	0.04	0.21	0.04	0.21	0.04	-5.07	1.94	0.72
TLK2-529	Q13112	CHAF1B	11|11|10|8|6|6	52	8.67	6	1|0|0|1|1|1|0|1|1|5|5|5|0|0|0|4|2|3|4|5|3|2|3|2|7|1|1|2|7|8|7|6|5|3|3|3|3|3|2|5|6|6|0|0|1	0.25	0.52	0.25	0.52	0.25	-4.42	3.05	0.47
TLK2-529	Q13123	IK	9|11|10|7|10|8	55	9.17	6	1|1|0|8|8|7|0|0|1|6|7|11|0|0|0|11|13|15|1|3|1|8|10|8|12|2|0|1|12|11|9|11|12|10|6|4|2|2|3|7|10|12|1|5|3	0	0	0	0	0	-12.15	1.62	0.86
TLK2-529	Q13126	MTAP	1|3|1|3|4|3	15	2.5	6	0|0|0|5|3|4|0|1|0|4|5|7|2|2|2|9|10|11|2|1|1|5|5|5|7|0|1|0|7|8|5|4|6|2|1|3|2|5|4|8|7|5|1|2|2	0	0	0	0	0	-14.79	0.69	0.87
TLK2-529	Q13129	RLF	1|1|2|1|1|3	9	1.5	6	0|0|0|0|0|0|0|0|0|0|0|0|0|1|0|0|0|0|0|0|0|0|0|0|0|0|1|0|0|0|0|0|1|0|1|0|1|3|1|0|1|0|0|0|0	0.18	0.71	0.18	0.71	0.18	-2.06	6.75	0.53
TLK2-529	Q13131	PRKAA1	1|0|0|2|1|1	5	0.83	6	1|0|1|4|3|2|0|0|0|1|5|3|0|0|0|2|3|1|2|3|2|2|4|3|5|1|1|1|4|6|5|3|4|5|4|4|4|4|2|2|4|4|4|5|4	0	0	0	0	0	-13.35	0.32	0.89
TLK2-529	Q13136	PPFIA1	2|1|1|0|0|0	4	0.67	6	1|1|2|2|3|2|0|0|0|3|4|3|1|1|1|8|6|6|2|3|2|5|4|4|4|0|2|0|6|6|6|8|7|5|4|5|3|5|7|2|4|6|3|2|3	0	0	0	0	0	-16.48	0.2	0.89
TLK2-529	Q13148	TARDBP	6|5|6|4|5|4	30	5	6	1|1|1|10|10|10|1|1|3|18|28|32|3|5|5|18|14|16|7|9|7|15|11|10|16|2|4|2|18|17|11|13|12|4|4|5|4|2|2|13|16|15|5|6|6	0	0	0	0	0	-30.07	0.54	0.89
TLK2-529	Q13151	HNRNPA0	8|7|7|4|4|4	34	5.67	6	2|3|1|2|3|5|3|2|1|13|9|12|3|5|5|3|4|3|7|9|8|5|4|5|8|3|4|2|8|8|7|8|6|6|2|8|2|5|4|12|14|9|2|2|3	0	0	0	0	0	-15.7	1.06	0.87
TLK2-529	Q13155	AIMP2	1|0|0|1|0|0	2	0.33	6	1|2|0|1|2|1|1|2|2|1|2|1|1|1|0|0|0|0|4|5|3|2|3|1|0|1|2|3|2|3|3|1|2|0|0|0|0|0|0|2|1|0|2|3|3	0	0	0	0	0	-8.28	0.23	0.89
TLK2-529	Q13162	PRDX4	3|2|1|2|3|3	14	2.33	6	0|1|1|9|9|7|2|2|1|5|7|8|5|5|5|8|5|4|4|4|4|7|8|9|12|3|4|4|11|14|6|6|6|3|1|1|1|1|1|6|8|8|7|6|4	0	0	0	0	0	-21.14	0.45	0.89
TLK2-529	Q13177	PAK2	3|3|3|2|2|2	15	2.5	6	0|0|0|25|29|29|0|0|0|15|21|19|0|0|0|23|22|21|1|1|1|17|19|20|18|0|0|0|17|21|17|19|16|18|12|14|12|12|15|18|15|24|16|18|20	0	0	0	0	0	-49.17	0.2	0.89
TLK2-529	Q13185	CBX3	12|9|8|6|8|8	51	8.5	6	1|1|0|10|12|12|5|2|2|14|19|19|2|1|1|12|10|10|8|6|9|8|10|10|13|5|4|4|11|11|11|10|8|4|4|5|8|7|6|6|10|8|5|4|4	0	0	0	0	0	-19.86	1.15	0.88
TLK2-529	Q13200	PSMD2	11|7|6|6|9|11	50	8.33	6	1|3|1|8|7|8|2|6|5|13|19|20|2|1|2|4|6|6|11|11|13|22|21|21|26|9|10|7|23|25|24|20|25|9|6|10|9|10|7|20|18|19|10|12|10	0	0	0	0	0	-35.67	0.72	0.89
TLK2-529	Q13206	DDX10	2|7|4|13|12|9	47	7.83	6	2|1|1|7|9|6|0|0|0|0|0|0|0|0|0|0|0|0|3|2|0|1|1|1|4|0|0|0|3|3|3|2|3|1|2|1|3|2|1|1|2|0|0|3|0	0.47	0.9	0.47	0.9	0.47	-4.88	5.18	0.27
TLK2-529	Q13227	GPS2	1|1|1|0|0|0	3	0.5	6	0|0|0|0|0|0|0|0|0|0|0|0|0|0|0|0|0|0|0|0|0|0|0|0|0|0|0|0|0|0|0|0|0|0|0|0|0|0|0|0|0|0|0|0|0	0	0	0	0	0	-3.34	5	0.89
TLK2-529	Q13242	SRSF9	1|0|1|0|0|0	2	0.33	6	0|0|0|0|0|0|0|0|0|0|0|0|0|0|0|0|0|0|3|3|4|0|0|0|0|0|0|0|0|0|0|0|0|3|1|1|1|1|1|0|0|0|0|0|0	0	0	0	0	0	-4.52	0.83	0.89
TLK2-529	Q13243	SRSF5	1|0|1|0|0|0	2	0.33	6	0|0|0|1|1|2|0|0|0|1|0|1|0|0|0|0|0|0|2|2|2|1|1|1|2|0|1|1|1|1|1|1|2|0|0|0|0|0|0|0|0|0|0|0|0	0	0	0	0	0	-4.98	0.6	0.89
TLK2-529	Q13257	MAD2L1	1|1|2|1|1|1	7	1.17	6	2|1|1|5|4|3|0|0|0|0|1|3|0|0|0|2|3|3|4|4|4|2|1|2|1|0|0|1|2|1|0|0|1|1|1|1|1|1|1|1|1|1|0|0|0	0	0.01	0	0.01	0	-6.13	0.88	0.84
TLK2-529	Q13263	TRIM28	56|53|57|67|73|70	376	62.67	6	7|8|9|52|51|56|6|13|8|51|59|62|13|15|11|38|40|44|21|19|20|39|41|41|33|10|7|7|30|30|28|27|27|43|55|56|51|55|50|56|48|49|31|31|31	0	0	0	0	0	-45.05	1.91	0.89
TLK2-529	Q13268	DHRS2	1|3|5|1|1|1	12	2	6	0|0|0|0|0|0|0|0|0|0|1|2|0|0|0|0|0|0|0|0|0|0|0|0|1|0|0|0|0|0|1|0|0|1|1|1|1|0|1|1|2|1|0|0|1	0.26	0.97	0.26	0.97	0.26	-2.57	6	0.44
TLK2-529	Q13283	G3BP1	9|10|12|9|11|12	63	10.5	6	5|7|6|39|36|37|10|18|14|73|103|105|14|10|12|59|59|61|19|22|18|64|58|65|65|14|14|13|65|75|70|75|67|18|12|14|13|10|13|67|73|72|13|12|14	0	0	0	0	0	-136.43	0.28	0.89
TLK2-529	Q13309	SKP2	4|4|3|2|1|2	16	2.67	6	0|0|0|4|4|3|0|0|0|3|4|4|0|0|0|0|3|0|1|1|1|4|3|3|5|0|0|0|6|5|1|3|2|1|0|1|1|2|2|2|1|2|1|1|1	0.02	0.04	0.02	0.04	0.02	-7.3	1.6	0.77
TLK2-529	Q13315	ATM	1|0|1|0|1|0	3	0.5	6	0|0|0|0|0|0|0|0|0|0|0|0|0|0|0|0|1|0|0|1|0|0|0|0|1|0|0|0|0|0|1|0|1|0|0|0|0|0|0|0|0|0|0|1|0	0	0	0	0	0	-3.46	3.75	0.89
TLK2-529	Q13325	IFIT5	1|2|4|2|3|2	14	2.33	6	5|3|4|22|23|23|0|0|0|0|0|0|0|0|0|0|0|0|0|0|1|0|0|0|0|0|0|0|0|0|0|0|1|6|7|8|11|9|9|0|0|0|7|14|11	0	0	0	0	0	-14.11	0.64	0.87
TLK2-529	Q13330	MTA1	7|7|9|6|9|9	47	7.83	6	2|2|1|3|2|4|2|3|2|6|6|7|1|0|2|3|3|4|3|2|3|3|5|4|6|3|5|3|4|7|5|7|7|5|4|2|2|4|4|4|4|2|3|3|3	0.03	0.06	0.03	0.06	0.03	-6.8	2.2	0.75
TLK2-529	Q13347	EIF3I	5|6|7|9|3|5	35	5.83	6	2|3|3|15|14|13|0|1|2|15|19|21|3|2|2|8|10|9|8|8|8|12|15|13|22|4|2|2|20|18|17|15|15|8|6|7|15|10|8|19|16|16|6|9|11	0	0	0	0	0	-36.07	0.58	0.89
TLK2-529	Q13356	PPIL2	15|12|11|10|10|8	66	11	6	0|0|0|12|11|11|0|0|0|7|8|8|0|0|0|10|7|10|1|2|1|6|5|4|13|0|1|0|14|13|9|7|9|8|6|4|8|8|8|7|10|8|6|9|9	0	0.01	0	0.01	0	-11.27	1.9	0.83
TLK2-529	Q13404	UBE2V1	2|2|2|0|0|0	6	1	6	0|0|0|3|4|4|0|0|0|1|3|2|2|1|2|2|2|3|0|2|1|3|2|2|3|0|0|0|4|3|2|2|2|2|2|2|2|3|2|1|3|2|4|4|7	0	0	0	0	0	-10.58	0.51	0.85
TLK2-529	Q13409	DYNC1I2	2|3|1|0|2|2	10	1.67	6	0|0|0|5|10|6|0|0|0|5|8|5|0|0|1|7|9|8|6|3|4|10|10|8|8|0|0|0|10|11|6|5|4|5|4|2|3|7|7|6|4|4|2|7|3	0	0	0	0	0	-21.2	0.37	0.89
TLK2-529	Q13416	ORC2	18|16|15|13|14|9	85	14.17	6	1|1|0|4|6|4|0|0|0|3|6|5|0|0|0|9|8|6|1|1|1|3|5|3|5|0|0|0|4|4|5|3|4|3|3|4|2|4|3|4|1|2|7|9|7	0.7	0.96	0.7	0.96	0.7	-2.3	4.52	0.12
TLK2-529	Q13418	ILK	1|3|3|0|0|0	7	1.17	6	0|0|0|2|1|5|0|0|0|4|7|9|0|0|0|3|2|1|1|1|1|4|1|2|13|1|1|0|11|8|11|11|9|9|1|1|1|0|1|2|2|4|2|3|5	0	0	0	0	0	-14.76	0.38	0.89
TLK2-529	Q13426	XRCC4	4|5|5|2|3|4	23	3.83	6	0|0|0|2|1|3|0|0|0|2|3|3|0|0|0|3|4|3|0|1|1|2|3|3|4|0|0|0|4|3|4|3|4|2|2|1|0|0|0|2|5|4|0|1|1	0.06	0.13	0.06	0.13	0.06	-5.66	2.33	0.69
TLK2-529	Q13428	TCOF1	24|27|27|17|21|19	135	22.5	6	15|14|13|49|46|49|14|25|21|29|36|37|16|20|17|42|34|36|10|8|10|23|28|22|28|9|18|18|25|28|20|24|24|23|29|31|20|21|22|19|37|37|13|26|23	0	0	0	0	0	-65.56	0.91	0.89
TLK2-529	Q13435	SF3B2	64|69|72|63|46|41	355	59.17	6	5|4|4|19|25|28|2|5|3|22|30|35|5|4|4|33|32|29|9|9|10|29|32|26|34|3|2|0|28|26|26|25|24|37|17|17|15|13|8|22|22|27|15|17|15	0.29	0.77	0.29	0.77	0.29	-13.85	3.34	0.43
TLK2-529	Q13442	PDAP1	5|4|4|3|4|4	24	4	6	2|4|4|18|21|22|0|0|2|13|12|9|3|4|4|23|25|24|2|2|2|15|14|13|7|0|1|1|8|7|9|8|7|10|10|7|9|13|13|10|10|13|10|10|10	0	0	0	0	0	-32.19	0.44	0.89
TLK2-529	Q13451	FKBP5	4|3|2|2|1|1	13	2.17	6	0|0|0|5|3|2|0|0|0|0|2|2|0|0|0|4|3|4|3|1|2|4|3|4|4|0|0|0|7|6|5|2|4|3|4|2|0|2|1|4|4|6|2|3|2	0	0.01	0	0.01	0	-9.49	0.95	0.84
TLK2-529	Q13492	PICALM	3|6|5|3|4|3	24	4	6	1|2|0|7|9|13|1|3|2|22|27|32|3|1|2|20|21|20|2|4|3|14|12|14|20|2|3|3|17|22|17|17|16|10|8|11|6|7|7|10|20|21|5|11|10	0	0	0	0	0	-38.29	0.38	0.89
TLK2-529	Q13501	SQSTM1	1|0|1|0|0|0	2	0.33	6	0|0|0|3|1|3|0|0|0|0|0|2|0|0|0|0|2|0|1|0|0|3|1|0|2|0|0|0|4|1|0|1|0|6|2|2|3|6|4|1|1|1|0|2|0	0	0	0	0	0	-6.83	0.29	0.89
TLK2-529	Q13503	MED21	2|0|0|1|1|2	6	1	6	0|0|0|0|0|0|0|0|0|0|0|0|0|0|0|0|0|0|1|0|0|1|1|1|1|0|0|0|0|1|1|2|1|0|0|0|0|0|0|0|0|0|0|0|0	0.15	0.46	0.15	0.46	0.15	-3.76	4.5	0.56
TLK2-529	Q13506	NAB1	4|2|4|3|7|5	25	4.17	6	0|0|0|0|1|0|0|0|0|0|0|0|0|0|0|1|2|2|0|0|0|0|0|0|3|0|0|0|2|3|1|1|1|0|1|0|0|1|0|0|0|0|0|0|0	0.61	0.97	0.61	0.97	0.61	-1.57	9.87	0.17
TLK2-529	Q13509	TUBB3	2|3|3|0|1|2	11	1.83	6	0|0|0|0|0|0|0|1|0|1|1|2|0|0|0|0|0|0|1|0|1|0|0|0|0|0|1|1|0|0|1|1|1|0|0|0|0|0|0|0|0|0|0|1|1	0.31	0.64	0.31	0.64	0.31	-4.1	5.89	0.4
TLK2-529	Q13523	PRPF4B	5|6|7|6|9|9	42	7	6	1|1|0|2|2|0|0|1|2|8|11|9|2|2|1|3|3|4|4|5|7|3|3|4|7|4|2|2|7|7|10|7|6|3|3|6|6|5|7|4|4|5|1|1|1	0	0.01	0	0.01	0	-9.19	1.79	0.82
TLK2-529	Q13547	HDAC1	8|7|7|8|7|8	45	7.5	6	1|3|1|1|1|1|0|2|2|1|4|4|0|0|0|0|0|1|4|3|5|5|4|6|10|2|2|2|6|6|5|5|6|1|0|0|2|1|1|4|6|3|4|6|3	0.07	0.1	0.07	0.1	0.07	-3.11	2.72	0.68
TLK2-529	Q13555	CAMK2G	1|1|0|4|1|0	7	1.17	6	0|0|0|1|2|4|0|0|0|1|6|3|1|1|1|3|3|2|0|0|0|0|1|2|3|0|1|1|2|3|1|2|2|1|2|12|1|1|2|0|0|1|1|0|0	0.01	0.08	0.01	0.08	0.01	-8.26	0.78	0.79
TLK2-529	Q13557	CAMK2D	1|1|0|0|1|1	4	0.67	6	1|0|0|2|3|2|0|1|0|3|7|6|0|1|1|4|6|5|0|0|1|0|0|0|1|1|1|0|1|1|1|1|1|1|1|1|1|1|1|2|2|2|1|2|1	0	0	0	0	0	-8.4	0.45	0.89
TLK2-529	Q13561	DCTN2	1|1|2|1|2|2	9	1.5	6	1|1|2|10|10|9|0|0|0|5|8|9|0|1|0|2|2|3|1|3|1|9|8|7|7|0|0|1|7|10|6|4|4|8|4|7|11|9|13|8|9|7|6|4|8	0	0	0	0	0	-20.2	0.3	0.89
TLK2-529	Q13564	NAE1	4|6|5|5|9|6	35	5.83	6	0|0|0|6|7|6|0|0|0|4|8|10|0|0|0|2|2|3|2|3|2|6|6|4|12|0|0|0|14|10|9|10|7|2|3|3|3|4|5|8|9|10|9|5|7	0	0	0	0	0	-12.39	1.31	0.85
TLK2-529	Q13573	SNW1	19|17|18|14|17|14	99	16.5	6	1|1|1|7|9|7|0|2|3|10|15|17|0|1|0|20|19|20|2|2|3|10|12|14|17|0|1|2|16|16|13|16|15|10|7|8|5|8|10|9|15|15|5|7|5	0	0	0	0	0	-12.3	1.97	0.86
TLK2-529	Q13595	TRA2A	2|1|1|1|1|1	7	1.17	6	0|0|0|0|0|0|0|0|1|1|1|1|0|0|0|0|0|0|2|2|2|0|0|0|0|0|0|0|0|0|0|1|1|0|1|0|0|0|0|0|0|0|0|0|0	0.05	0.3	0.05	0.3	0.05	-2.43	4.04	0.71
TLK2-529	Q13596	SNX1	3|5|6|4|3|3	24	4	6	4|1|1|11|14|14|0|0|0|2|7|9|0|1|0|5|5|4|0|0|0|5|2|4|7|0|0|0|5|6|5|6|3|9|9|6|11|10|11|4|4|4|11|7|9	0	0	0	0	0	-15.22	0.83	0.88
TLK2-529	Q13613	MTMR1	1|1|2|2|3|2	11	1.83	6	0|0|0|4|3|4|0|0|0|0|1|1|0|0|0|1|3|2|0|0|0|0|1|0|1|0|0|0|3|2|1|3|4|3|4|2|2|2|2|0|0|1|4|4|4	0.01	0.03	0.01	0.03	0.01	-6.22	1.33	0.79
TLK2-529	Q13616	CUL1	4|6|4|3|7|4	28	4.67	6	0|0|0|2|0|0|0|0|0|7|8|7|0|0|0|0|0|0|6|7|8|4|4|5|4|0|0|0|3|6|4|6|8|6|2|3|7|4|3|7|3|5|3|2|3	0	0.02	0	0.02	0	-8.89	1.53	0.82
TLK2-529	Q13617	CUL2	1|2|2|2|1|2	10	1.67	6	0|0|0|1|1|2|0|0|0|2|4|4|0|0|0|4|3|1|2|3|3|3|3|3|5|0|0|0|3|7|3|6|5|1|1|1|0|0|0|3|2|2|1|1|2	0	0	0	0	0	-7.87	0.91	0.84
TLK2-529	Q13618	CUL3	9|9|7|10|8|11	54	9	6	0|0|0|2|2|2|0|0|0|9|11|12|0|0|1|10|9|8|5|4|6|8|10|10|13|0|2|2|12|9|9|13|10|7|4|1|3|3|3|8|9|11|3|5|5	0	0	0	0	0	-11.13	1.68	0.86
TLK2-529	Q13619	CUL4A	1|0|0|0|0|0	1	0.17	6	0|0|0|0|0|0|0|0|0|0|1|0|0|0|0|1|1|1|0|0|0|2|1|1|1|0|0|1|1|1|1|2|1|1|0|1|0|1|1|3|3|3|1|1|1	0	0	0	0	0	-5.54	0.23	0.89
TLK2-529	Q13620	CUL4B	12|15|18|14|19|15	93	15.5	6	4|3|2|20|20|23|0|1|1|12|17|16|1|3|3|18|21|16|2|2|5|10|9|9|14|1|0|1|15|15|14|13|15|12|10|12|12|11|12|10|14|15|9|14|14	0	0	0	0	0	-20.24	1.55	0.88
TLK2-529	Q13625	TP53BP2	1|1|1|2|0|0	5	0.83	6	2|3|3|5|7|8|0|0|0|5|12|18|0|2|2|14|17|21|1|1|1|8|8|8|12|1|1|2|11|12|10|12|7|7|5|5|13|12|8|8|6|6|6|7|7	0	0	0	0	0	-30.91	0.12	0.89
TLK2-529	Q13642	FHL1	2|2|2|2|3|3	14	2.33	6	0|0|0|4|6|5|0|0|0|6|7|5|0|0|1|11|8|10|2|1|1|6|4|3|8|0|0|0|8|9|5|4|5|3|5|4|5|7|4|6|8|7|4|4|4	0	0	0	0	0	-14	0.58	0.89
TLK2-529	Q13769	THOC5	4|4|3|2|6|7	26	4.33	6	2|1|1|2|1|2|0|1|0|0|2|4|0|0|0|0|0|0|3|3|2|1|2|1|2|1|1|1|2|2|1|2|2|2|1|0|3|1|1|0|0|0|0|1|0	0.35	0.89	0.35	0.89	0.35	-3.98	3.82	0.37
TLK2-529	Q13823	GNL2	5|3|3|0|0|0	11	1.83	6	2|2|2|1|2|0|0|0|0|2|1|3|0|0|0|0|0|0|7|7|6|2|2|2|2|0|0|0|2|1|4|2|2|4|1|0|0|0|0|0|0|0|2|1|0	0.05	0.2	0.05	0.2	0.05	-7.82	1.33	0.72
TLK2-529	Q13838	DDX39B	7|8|7|4|2|3	31	5.17	6	0|0|0|5|7|5|0|0|0|1|7|6|1|1|2|6|5|5|6|9|10|3|2|4|4|0|1|0|6|5|4|6|6|4|3|6|6|5|3|5|4|3|4|4|2	0	0.01	0	0.01	0	-13.06	1.4	0.83
TLK2-529	Q13868	EXOSC2	6|7|6|4|5|6	34	5.67	6	1|1|1|5|7|5|0|0|1|5|8|9|0|0|0|0|0|0|2|2|2|7|7|5|10|1|1|0|9|10|8|7|8|3|0|1|2|1|1|6|7|9|1|2|1	0	0.01	0	0.01	0	-8.77	1.63	0.83
TLK2-529	Q13885	TUBB2A	2|1|1|0|0|1	5	0.83	6	1|1|0|2|1|1|0|1|1|1|2|2|0|0|0|1|1|1|1|1|1|0|0|0|1|1|1|2|1|1|1|2|1|1|1|1|1|1|1|2|1|0|0|0|0	0.01	0.04	0.01	0.04	0.01	-6.1	0.96	0.8
TLK2-529	Q13888	GTF2H2	1|2|2|3|0|1	9	1.5	6	0|0|0|0|1|1|0|0|0|1|1|1|0|0|0|0|0|0|1|2|2|1|1|0|2|0|1|1|3|2|3|4|3|1|1|0|0|0|0|1|1|0|0|0|0	0.05	0.18	0.05	0.18	0.05	-5.81	1.93	0.71
TLK2-529	Q13889	GTF2H3	1|0|0|1|2|3	7	1.17	6	0|0|0|0|0|0|0|0|0|0|0|0|0|0|0|0|0|0|0|0|0|0|0|0|1|0|0|0|0|1|0|2|0|0|0|1|0|0|0|0|0|0|0|0|0	0.27	0.93	0.27	0.93	0.27	-3.38	10.5	0.44
TLK2-529	Q13895	BYSL	1|0|1|1|1|0	4	0.67	6	0|0|0|2|1|1|0|0|0|0|1|1|0|0|0|4|3|4|3|3|4|6|4|4|5|0|0|0|8|8|5|4|5|3|0|0|0|0|0|4|5|5|1|2|1	0	0	0	0	0	-10.93	0.31	0.89
TLK2-529	Q13905	RAPGEF1	1|0|1|0|0|0	2	0.33	6	0|0|0|0|0|0|0|0|0|0|0|0|0|0|0|1|2|1|0|0|0|0|1|0|1|0|0|0|0|1|1|1|0|0|0|0|0|0|0|0|0|0|0|0|0	0	0	0	0	0	-3.68	1.67	0.89
TLK2-529	Q13951	CBFB	1|1|1|0|0|0	3	0.5	6	0|0|0|3|3|2|0|0|0|1|0|1|0|0|0|0|2|1|1|1|1|1|1|1|3|0|0|0|3|4|3|2|2|2|1|1|1|1|1|2|1|2|2|2|1	0	0	0	0	0	-7.18	0.42	0.89
TLK2-529	Q13952	NFYC	1|0|1|0|0|0	2	0.33	6	0|0|0|0|0|0|0|0|0|0|0|0|0|0|0|0|0|0|0|0|0|0|0|0|0|0|0|0|0|0|0|1|1|0|0|0|0|0|0|0|0|0|0|0|0	0	0	0	0	0	-3.34	3.33	0.89
TLK2-529	Q14004	CDK13	4|3|4|3|6|5	25	4.17	6	0|0|0|1|1|0|0|0|0|0|2|3|0|1|1|1|2|1|0|0|0|2|0|0|2|0|0|0|2|3|1|0|1|1|3|1|1|1|1|0|1|0|0|0|0	0.54	0.96	0.54	0.96	0.54	-1.31	5.68	0.22
TLK2-529	Q14008	CKAP5	16|16|18|3|5|6	64	10.67	6	23|28|26|29|32|27|3|4|4|17|31|30|18|16|15|35|35|34|16|10|14|34|28|34|35|15|9|12|37|37|37|34|35|31|24|23|19|21|29|37|32|32|28|33|33	0	0	0	0	0	-101.25	0.42	0.89
TLK2-529	Q14011	CIRBP	3|1|1|2|1|4	12	2	6	0|0|0|2|1|1|0|0|0|1|1|1|1|3|1|0|0|0|4|4|2|5|4|4|1|0|0|0|2|0|1|0|0|2|2|1|2|4|2|1|2|1|0|0|0	0.03	0.14	0.03	0.14	0.03	-5.75	1.61	0.74
TLK2-529	Q14061	COX17	1|2|0|1|1|1	6	1	6	0|0|0|0|0|0|0|0|0|0|0|0|0|0|0|0|0|0|1|1|1|1|0|0|0|0|0|0|0|0|0|0|0|0|1|1|1|1|1|0|0|0|1|1|1	0.05	0.33	0.05	0.33	0.05	-3.94	3.75	0.7
TLK2-529	Q14103	HNRNPD	6|7|6|8|8|7	42	7	6	1|2|2|7|4|6|2|3|1|8|9|9|1|1|3|4|7|7|8|9|7|5|5|6|8|0|1|1|7|6|3|2|5|7|10|10|7|10|7|3|3|2|3|3|2	0	0	0	0	0	-11	1.45	0.87
TLK2-529	Q14106	TOB2	1|0|0|0|1|1	3	0.5	6	0|0|0|0|0|0|0|0|0|0|0|0|0|0|0|0|0|0|0|0|0|0|0|0|1|0|0|0|2|0|2|0|0|0|0|0|0|0|0|0|0|0|0|0|0	0	0	0	0	0	-3.4	4.5	0.89
TLK2-529	Q14119	VEZF1	4|2|2|1|1|2	12	2	6	0|0|0|0|0|0|0|0|0|0|0|1|0|0|0|1|0|0|1|1|1|2|1|1|1|1|0|1|1|1|1|0|2|1|0|1|1|0|1|1|0|1|0|0|0	0.18	0.7	0.18	0.7	0.18	-3.21	3.91	0.53
TLK2-529	Q14137	BOP1	13|6|8|8|12|7	54	9	6	1|0|0|5|5|4|0|2|0|1|1|3|0|0|0|0|1|1|9|6|7|3|2|1|2|0|0|0|6|1|1|2|3|7|4|3|3|4|2|1|1|2|2|1|3	0.39	0.84	0.39	0.84	0.39	-2.62	4.05	0.34
TLK2-529	Q14147	DHX34	3|2|1|4|4|6	20	3.33	6	0|0|0|0|0|0|0|0|0|0|2|0|0|0|0|0|1|1|0|0|0|0|0|0|2|0|0|0|1|2|0|1|0|2|1|0|1|1|1|1|1|1|1|2|2	0.47	0.97	0.47	0.97	0.47	-3.29	6.25	0.27
TLK2-529	Q14152	EIF3A	5|4|7|2|2|3	23	3.83	6	3|5|4|15|21|21|2|6|3|22|29|31|4|5|3|12|12|10|20|27|26|27|27|25|29|13|13|13|25|36|25|28|29|15|13|13|12|11|9|22|22|22|16|18|18	0	0	0	0	0	-68.32	0.23	0.89
TLK2-529	Q14157	UBAP2L	9|10|12|8|12|10	61	10.17	6	13|14|9|42|50|47|4|12|11|51|74|67|27|28|28|73|72|77|16|18|17|47|48|48|38|11|18|19|42|51|34|35|36|31|31|31|39|35|39|56|55|51|21|26|25	0	0	0	0	0	-131.52	0.28	0.89
TLK2-529	Q14181	POLA2	22|19|25|17|20|16	119	19.83	6	1|1|1|10|8|9|0|0|0|7|13|11|0|0|0|13|11|11|2|0|3|9|9|6|12|0|0|0|13|10|13|12|12|7|4|5|6|7|6|7|6|7|9|10|10	0.21	0.67	0.21	0.67	0.21	-4.56	3.18	0.5
TLK2-529	Q14186	TFDP1	4|1|2|4|3|6	20	3.33	6	0|0|0|1|2|1|0|0|0|0|3|2|0|0|0|3|4|4|0|1|0|2|1|2|5|0|0|0|3|4|2|1|2|0|0|0|0|0|0|1|2|1|0|0|0	0.17	0.52	0.17	0.52	0.17	-4.93	3.19	0.53
TLK2-529	Q14192	FHL2	1|0|0|0|0|0	1	0.17	6	1|1|1|0|0|0|0|1|1|0|0|0|2|2|1|0|0|0|0|0|0|1|1|1|2|0|1|1|1|1|1|2|2|0|1|0|0|0|0|0|3|1|0|2|1	0	0	0	0	0	-5.54	0.23	0.89
TLK2-529	Q14195	DPYSL3	6|5|4|4|4|3	26	4.33	6	1|1|0|21|19|21|0|0|0|18|19|21|3|4|2|14|19|19|4|4|3|17|10|17|22|0|1|1|18|17|14|17|16|11|13|7|15|15|14|11|10|13|12|13|11	0	0	0	0	0	-39.35	0.4	0.89
TLK2-529	Q14202	ZMYM3	1|1|2|5|4|3	16	2.67	6	0|0|0|2|1|1|0|0|0|0|0|1|0|0|0|1|1|2|0|1|0|2|1|1|1|0|0|0|2|2|1|1|1|1|0|0|1|1|0|0|0|0|0|0|0	0.33	0.88	0.33	0.88	0.33	-3.37	4.8	0.39
TLK2-529	Q14203	DCTN1	1|3|3|1|0|0	8	1.33	6	4|5|3|10|10|10|0|3|1|1|6|3|2|0|0|2|3|2|10|9|6|1|4|4|11|3|6|7|9|8|6|7|6|16|14|12|5|7|5|4|4|2|4|8|12	0	0	0	0	0	-26.28	0.24	0.89
TLK2-529	Q14204	DYNC1H1	4|2|2|0|3|3	14	2.33	6	8|4|3|4|3|4|0|2|2|3|5|7|13|12|6|8|9|8|61|57|61|11|15|13|17|14|16|13|15|16|14|13|13|3|4|2|5|7|3|13|15|10|16|21|16	0	0	0	0	0	-55.99	0.19	0.89
TLK2-529	Q14241	ELOA	12|11|10|5|7|5	50	8.33	6	0|0|0|4|6|5|0|0|0|2|5|8|0|0|0|8|9|10|0|2|1|5|8|8|7|0|0|0|7|10|8|9|7|3|2|2|2|2|2|5|4|2|2|5|5	0.06	0.18	0.06	0.18	0.06	-8.13	2.27	0.7
TLK2-529	Q14247	CTTN	19|20|16|16|16|18	105	17.5	6	30|31|28|93|90|88|20|29|29|121|119|125|33|28|31|90|93|90|13|14|15|51|53|53|44|18|16|14|44|46|44|40|34|55|61|57|70|75|76|81|84|78|46|37|42	0	0	0	0	0	-185.85	0.32	0.89
TLK2-529	Q14257	RCN2	2|2|1|0|0|0	5	0.83	6	0|0|0|0|0|0|0|0|1|1|1|1|0|0|0|2|3|4|9|8|9|3|3|2|1|0|0|0|2|1|1|2|2|0|0|0|0|0|0|2|1|0|1|2|1	0	0.01	0	0.01	0	-7.77	0.6	0.82
TLK2-529	Q14258	TRIM25	7|7|9|2|7|7	39	6.5	6	2|3|3|18|20|14|1|3|1|20|28|30|2|2|1|10|10|13|6|5|9|18|17|19|27|2|3|3|23|27|17|21|18|15|12|11|12|11|10|24|19|21|9|16|11	0	0	0	0	0	-49.48	0.52	0.89
TLK2-529	Q14315	FLNC	4|4|3|4|4|3	22	3.67	6	21|25|21|7|5|7|1|3|1|6|6|5|7|8|8|8|4|9|7|6|7|7|7|4|8|6|5|7|7|8|7|7|6|7|7|3|6|6|9|2|1|5|5|8|5	0	0	0	0	0	-23.74	0.52	0.89
TLK2-529	Q14320	FAM50A	13|10|13|6|7|8	57	9.5	6	0|0|0|19|18|20|0|0|1|9|16|11|1|0|0|16|17|21|0|2|0|16|14|17|20|0|0|0|21|21|19|20|15|13|9|7|9|7|8|8|9|9|7|9|12	0	0	0	0	0	-26.82	1.02	0.88
TLK2-529	Q14331	FRG1	3|2|5|3|6|6	25	4.17	6	0|0|0|3|2|2|0|0|0|4|6|6|1|0|0|3|3|3|3|2|2|2|3|4|4|0|0|0|3|5|3|2|4|3|4|4|4|4|4|5|4|4|2|3|2	0.01	0.04	0.01	0.04	0.01	-8.87	1.66	0.78
TLK2-529	Q14444	CAPRIN1	3|3|3|3|3|4	19	3.17	6	1|1|1|15|14|11|1|3|3|19|27|27|3|3|3|14|10|12|12|14|8|11|9|14|20|4|5|3|17|15|16|17|12|8|11|10|13|13|12|25|16|18|4|2|2	0	0	0	0	0	-38.53	0.3	0.89
TLK2-529	Q14493	SLBP	1|0|1|0|1|1	4	0.67	6	0|0|0|1|3|4|0|0|0|0|1|2|0|0|0|0|2|1|0|0|0|2|3|2|3|0|0|0|5|3|2|2|2|4|1|2|1|1|1|1|0|0|0|1|0	0	0	0	0	0	-6.76	0.6	0.89
TLK2-529	Q14498	RBM39	8|6|11|6|8|9	48	8	6	5|8|5|8|10|9|1|4|3|6|11|10|4|5|5|2|5|3|7|10|5|4|5|5|12|3|2|4|10|9|5|7|5|5|4|4|5|5|4|5|4|4|2|3|3	0	0	0	0	0	-13.36	1.47	0.86
TLK2-529	Q14562	DHX8	24|24|27|18|24|19	136	22.67	6	0|1|0|3|2|1|0|0|0|3|10|10|0|0|0|0|1|3|1|1|0|2|0|3|11|0|0|0|14|12|10|12|10|7|4|4|6|6|4|5|7|8|4|1|2	0.79	0.91	0.79	0.91	0.79	0.44	6.07	0.07
TLK2-529	Q14566	MCM6	23|22|23|16|17|17	118	19.67	6	3|1|1|11|15|15|1|7|3|16|22|24|6|5|5|19|16|16|20|18|27|19|14|16|19|3|5|3|17|18|16|15|21|10|8|7|7|8|5|22|18|20|10|13|12	0	0	0	0	0	-22.95	1.59	0.88
TLK2-529	Q14596	NBR1	1|0|1|2|0|1	5	0.83	6	0|0|0|1|2|2|0|0|0|0|1|1|0|0|0|2|3|1|1|0|0|1|0|1|1|0|0|0|0|0|1|0|0|6|5|5|2|5|3|0|1|1|0|1|1	0.01	0.03	0.01	0.03	0.01	-6.39	0.78	0.81
TLK2-529	Q14651	PLS1	1|2|0|1|0|0	4	0.67	6	0|0|0|4|8|4|0|0|0|1|6|6|0|0|0|6|6|8|0|0|0|2|5|1|8|0|0|0|5|6|6|7|7|9|5|4|7|6|6|2|3|2|6|7|7	0	0	0	0	0	-17.04	0.19	0.89
TLK2-529	Q14669	TRIP12	8|8|6|3|6|4	35	5.83	6	0|0|0|2|1|1|0|0|0|4|9|8|0|0|0|6|5|5|4|5|6|4|3|3|14|1|1|2|12|13|11|11|10|6|9|4|6|6|5|8|8|7|1|3|2	0	0	0	0	0	-14.36	1.27	0.86
TLK2-529	Q14676	MDC1	12|7|10|14|16|17	76	12.67	6	7|5|6|8|14|8|0|2|0|9|14|16|0|3|1|2|2|0|17|16|20|1|1|2|7|0|4|4|9|8|12|12|14|5|4|3|6|3|3|2|2|1|4|5|3	0.01	0.04	0.01	0.04	0.01	-12.8	2.15	0.79
TLK2-529	Q14677	CLINT1	12|14|13|6|8|5	58	9.67	6	11|9|7|40|38|35|2|2|2|17|20|23|8|6|6|25|31|24|4|4|5|22|22|20|27|7|11|7|25|28|21|23|29|21|23|19|15|15|17|15|24|23|16|22|21	0	0	0	0	0	-62.41	0.55	0.89
TLK2-529	Q14683	SMC1A	15|15|13|17|11|11	82	13.67	6	4|4|2|9|7|5|0|1|1|1|4|4|0|0|0|0|0|0|13|21|21|6|5|8|3|6|9|8|4|3|5|8|6|15|10|4|5|8|7|7|7|6|8|12|8	0.01	0.04	0.01	0.04	0.01	-8.09	2.32	0.79
TLK2-529	Q14684	RRP1B	4|5|2|2|3|1	17	2.83	6	0|0|0|0|0|0|0|0|0|2|7|9|0|0|0|0|0|0|7|8|6|3|5|4|9|0|0|1|15|8|6|6|6|5|7|3|1|2|4|6|5|5|0|0|0	0	0	0	0	0	-12.25	0.91	0.85
TLK2-529	Q14686	NCOA6	7|1|1|2|2|3	16	2.67	6	0|0|0|0|1|0|0|0|0|1|1|1|0|0|0|2|2|1|0|0|0|1|2|1|0|0|0|0|1|0|1|1|0|0|0|0|0|0|0|0|0|0|0|0|0	0.36	1	0.36	1	0.36	-2.79	7.5	0.36
TLK2-529	Q14687	GSE1	2|2|4|7|6|7	28	4.67	6	2|3|1|0|0|0|0|1|2|0|2|2|0|0|0|0|1|1|1|2|3|1|3|2|1|4|4|5|1|0|3|1|2|4|1|0|2|1|1|2|3|3|6|9|8	0.11	0.24	0.11	0.24	0.11	-6.61	2.39	0.63
TLK2-529	Q14690	PDCD11	2|3|3|2|1|1	12	2	6	1|0|0|0|0|0|0|0|0|1|3|3|0|0|0|0|0|0|11|17|14|2|2|2|4|0|0|0|5|6|5|2|4|2|3|1|3|2|2|3|3|2|0|0|1	0	0	0	0	0	-9.04	0.87	0.85
TLK2-529	Q14691	GINS1	2|1|2|1|1|1	8	1.33	6	0|0|0|2|4|2|0|0|0|3|5|5|0|0|0|3|3|2|0|0|0|4|4|5|5|1|0|0|4|3|6|6|4|2|2|2|1|2|3|5|4|5|1|1|1	0	0	0	0	0	-9.2	0.6	0.89
TLK2-529	Q14692	BMS1	1|2|1|2|4|4	14	2.33	6	0|0|0|0|0|0|0|2|0|0|3|4|0|0|0|2|1|2|9|6|7|3|2|2|3|0|0|0|4|7|2|2|2|1|1|0|0|0|1|2|2|3|0|0|1	0.02	0.05	0.02	0.05	0.02	-7.07	1.42	0.77
TLK2-529	Q14697	GANAB	4|5|7|0|0|0	16	2.67	6	0|0|0|0|0|1|0|0|0|0|1|1|1|1|1|2|2|1|20|20|20|3|2|2|2|0|1|3|2|1|2|2|3|2|3|0|2|2|2|0|3|2|4|7|8	0.01	0.04	0.01	0.04	0.01	-13.71	0.93	0.8
TLK2-529	Q14738	PPP2R5D	4|1|2|7|8|9	31	5.17	6	0|0|0|10|9|8|0|0|0|3|5|5|1|0|0|10|9|8|2|1|1|4|5|5|10|0|0|0|8|10|7|8|4|9|10|5|10|9|10|5|6|5|3|6|6	0	0	0	0	0	-19.58	1.07	0.86
TLK2-529	Q14739	LBR	1|2|2|0|1|1	7	1.17	6	1|0|0|11|12|12|1|0|0|7|8|9|3|2|1|5|5|4|4|3|1|9|9|9|6|0|1|1|6|9|5|10|9|6|7|6|4|6|4|3|5|4|4|6|7	0	0	0	0	0	-23.3	0.23	0.89
TLK2-529	Q14781	CBX2	1|0|0|0|0|1	2	0.33	6	0|0|0|0|0|1|0|0|0|0|1|1|0|0|0|0|0|0|0|1|1|0|1|0|1|0|0|0|1|0|0|2|0|1|1|0|1|0|1|0|1|0|0|0|0	0	0	0	0	0	-4.18	1	0.89
TLK2-529	Q14807	KIF22	1|0|2|0|0|0	3	0.5	6	0|0|0|1|0|1|0|1|0|0|0|1|0|0|0|0|0|0|1|0|1|0|0|0|2|0|1|1|1|1|1|1|1|1|1|1|2|1|1|0|0|0|0|0|0	0.02	0.14	0.02	0.14	0.02	-4.74	1.02	0.76
TLK2-529	Q14814	MEF2D	10|9|11|7|10|8	55	9.17	6	2|1|0|3|3|3|0|0|0|0|1|3|0|0|0|1|1|3|0|0|0|1|1|0|2|0|0|0|1|2|2|2|2|3|3|0|2|5|4|0|1|1|1|2|1	0.94	1	0.94	1	0.94	1.26	7.24	0.02
TLK2-529	Q14839	CHD4	65|61|62|82|79|75	424	70.67	6	7|14|11|33|43|41|0|3|1|19|36|46|1|0|0|8|13|9|17|16|15|23|25|20|43|12|13|8|35|45|32|36|40|17|16|15|17|24|24|25|25|24|13|23|22	0.24	0.69	0.24	0.69	0.24	-6.99	3.49	0.47
TLK2-529	Q14847	LASP1	1|0|0|0|0|0	1	0.17	6	1|0|0|30|33|30|0|0|0|15|14|16|0|0|0|11|12|12|0|0|0|10|9|7|10|0|0|0|14|12|9|9|14|3|10|6|2|15|15|10|6|10|3|6|6	0	0	0	0	0	-35.93	0.02	0.89
TLK2-529	Q14919	DRAP1	2|2|2|2|1|0	9	1.5	6	0|0|0|1|1|1|0|0|0|1|3|2|1|0|0|1|2|2|0|0|0|3|3|4|4|0|0|0|3|1|2|4|4|4|3|2|3|3|2|1|0|1|3|3|3	0	0	0	0	0	-8.9	0.95	0.83
TLK2-529	Q14938	NFIX	1|2|4|3|2|2	14	2.33	6	0|0|0|0|0|0|0|0|0|0|1|0|0|0|0|0|0|0|0|0|0|0|0|0|0|0|0|0|1|0|0|0|0|0|0|0|0|0|1|0|0|0|0|0|0	0.71	0.99	0.71	0.99	0.71	-0.83	23.33	0.12
TLK2-529	Q14966	ZNF638	10|11|13|12|16|16	78	13	6	4|3|1|7|7|9|0|0|2|11|21|22|3|3|5|14|10|13|13|15|20|8|6|7|18|3|5|3|15|18|13|16|10|9|5|7|12|9|7|8|9|6|1|3|3	0	0	0	0	0	-17.89	1.52	0.88
TLK2-529	Q14974	KPNB1	17|15|17|10|14|15	88	14.67	6	6|7|7|13|16|14|4|16|13|31|40|46|13|10|10|7|11|12|31|32|33|29|22|25|28|20|20|17|32|32|28|29|31|25|15|17|22|23|18|24|29|30|24|28|27	0	0	0	0	0	-66.8	0.68	0.89
TLK2-529	Q14978	NOLC1	1|4|3|0|1|0	9	1.5	6	0|0|0|2|1|1|0|0|0|4|7|9|0|0|0|3|6|3|2|5|6|6|5|4|7|0|0|0|7|8|5|6|5|1|2|0|1|1|1|6|4|5|0|1|0	0	0	0	0	0	-13.63	0.54	0.86
TLK2-529	Q14980	NUMA1	17|23|26|22|24|22	134	22.33	6	35|40|34|13|12|11|6|19|14|5|7|7|0|1|1|0|0|1|37|41|43|3|1|3|6|13|14|18|9|8|4|5|8|11|5|10|10|15|16|4|5|4|1|2|5	0	0	0	0	0	-17.62	1.98	0.87
TLK2-529	Q14C86	GAPVD1	1|1|1|1|1|1	6	1	6	3|3|2|3|3|2|0|0|0|2|0|3|0|1|0|2|2|2|0|1|0|2|1|0|2|0|1|0|2|1|0|0|0|11|8|11|7|8|9|2|2|2|2|3|3	0	0	0	0	0	-9.44	0.42	0.89
TLK2-529	Q15003	NCAPH	4|4|3|1|2|0	14	2.33	6	3|3|5|12|13|12|2|1|2|9|16|14|3|1|1|9|14|13|7|9|9|5|4|5|14|6|5|1|13|13|8|11|11|6|7|8|6|5|5|6|7|10|3|7|4	0	0	0	0	0	-33.44	0.32	0.89
TLK2-529	Q15004	PCLAF	1|0|0|0|1|1	3	0.5	6	0|0|0|4|3|3|0|0|0|0|0|0|0|0|0|0|1|0|1|0|0|0|1|0|0|0|0|0|0|0|0|0|0|2|1|1|0|1|0|0|0|0|0|1|1	0	0	0	0	0	-4.66	1.12	0.89
TLK2-529	Q15007	WTAP	5|6|5|7|7|7	37	6.17	6	0|0|1|1|0|1|0|1|1|1|2|2|0|0|0|0|0|0|1|1|3|0|0|0|2|0|0|1|3|1|4|4|3|1|0|2|3|3|2|2|1|1|0|1|1	0.72	0.9	0.72	0.9	0.72	-0.18	5.55	0.11
TLK2-529	Q15008	PSMD6	8|9|5|4|4|8	38	6.33	6	0|0|0|2|3|3|0|0|0|3|11|11|0|0|0|4|3|2|5|5|3|7|6|5|8|1|1|1|8|7|10|8|11|4|2|2|5|3|2|7|9|9|5|6|8	0	0	0	0	0	-11.58	1.5	0.84
TLK2-529	Q15014	MORF4L2	2|3|1|0|0|0	6	1	6	0|0|0|0|0|0|0|0|0|0|0|0|0|0|0|0|0|0|0|0|0|0|0|0|0|0|0|0|0|0|0|1|0|0|0|1|0|1|1|1|1|0|0|0|0	0.26	0.92	0.26	0.92	0.26	-3.46	7.5	0.44
TLK2-529	Q15019	SEPTIN2	8|10|5|4|5|6	38	6.33	6	10|6|7|23|23|23|4|5|5|16|22|25|0|0|1|10|8|10|3|8|7|20|22|18|19|5|7|5|17|16|14|16|15|15|19|15|15|14|10|16|16|19|10|12|13	0	0	0	0	0	-44.01	0.51	0.89
TLK2-529	Q15020	SART3	30|28|33|30|37|35	193	32.17	6	7|7|7|14|16|16|0|0|0|10|22|23|2|1|2|11|13|14|7|7|8|16|16|17|18|4|5|5|18|20|19|20|16|19|21|13|15|12|14|11|9|13|9|9|10	0.03	0.14	0.03	0.14	0.03	-7.95	2.81	0.74
TLK2-529	Q15024	EXOSC7	4|4|6|4|5|5	28	4.67	6	1|0|0|3|3|3|1|1|0|5|4|5|0|0|0|0|0|0|2|1|1|2|1|2|8|4|3|5|8|8|5|6|4|6|2|3|4|5|3|3|3|4|3|2|2	0	0.01	0	0.01	0	-6.77	1.67	0.82
TLK2-529	Q15025	TNIP1	1|2|1|0|0|0	4	0.67	6	1|2|1|4|4|4|0|0|0|0|0|0|0|0|0|2|3|3|0|0|0|1|1|2|2|0|0|0|0|2|0|0|0|1|2|3|2|1|2|0|1|1|1|2|2	0	0.02	0	0.02	0	-6.82	0.6	0.82
TLK2-529	Q15029	EFTUD2	36|39|34|28|31|33	201	33.5	6	3|2|1|15|15|16|5|7|8|22|32|34|0|0|0|12|9|9|25|31|29|27|26|24|31|8|6|9|27|28|27|22|26|20|10|3|13|16|13|20|23|25|7|11|11	0	0	0	0	0	-19.77	2.13	0.88
TLK2-529	Q15047	SETDB1	1|0|0|1|0|0	2	0.33	6	0|0|0|2|1|1|0|0|0|1|2|1|0|0|0|2|3|1|1|0|0|1|2|1|2|0|0|0|2|2|0|0|0|1|1|4|0|0|0|0|0|0|0|0|0	0	0	0	0	0	-5.49	0.48	0.89
TLK2-529	Q15054	POLD3	7|6|4|7|6|4	34	5.67	6	1|1|2|6|7|6|2|1|1|3|3|4|0|1|0|7|5|8|1|0|1|3|2|3|3|3|2|2|3|4|1|1|1|4|3|2|3|3|4|2|4|5|1|3|4	0.02	0.05	0.02	0.05	0.02	-6.93	2.02	0.77
TLK2-529	Q15056	EIF4H	10|9|7|5|5|6	42	7	6	0|0|0|7|11|11|0|2|0|12|15|21|4|2|1|9|9|10|3|2|3|6|5|9|9|0|0|1|6|6|8|6|6|12|9|9|9|11|11|8|9|9|7|6|5	0	0	0	0	0	-17.87	1.09	0.88
TLK2-529	Q15059	BRD3	6|4|5|3|5|3	26	4.33	6	0|0|0|5|3|3|0|0|0|0|2|3|0|0|0|6|6|4|2|2|2|3|2|4|5|0|0|0|6|3|5|5|5|6|6|3|3|5|6|2|2|3|2|4|4	0.01	0.02	0.01	0.02	0.01	-7.92	1.6	0.81
TLK2-529	Q15061	WDR43	2|2|4|6|3|1	18	3	6	1|1|0|2|2|1|0|0|0|0|0|0|0|0|0|0|0|0|0|2|1|0|0|0|0|0|0|0|0|0|0|0|0|1|2|1|0|0|0|0|1|1|2|4|3	0.32	0.88	0.32	0.88	0.32	-3.19	5.4	0.39
TLK2-529	Q15084	PDIA6	8|8|7|2|1|1	27	4.5	6	1|1|0|7|8|8|1|2|0|3|3|5|4|2|1|4|5|3|9|8|12|7|7|7|5|3|2|4|7|8|6|6|6|1|2|2|3|4|2|3|2|4|1|2|3	0	0	0	0	0	-16.63	1.1	0.85
TLK2-529	Q15121	PEA15	1|0|1|0|1|0	3	0.5	6	0|0|0|12|16|15|0|0|0|8|11|9|0|0|0|8|8|8|1|3|2|11|11|12|11|0|0|0|14|11|10|12|12|3|3|2|2|4|4|11|11|12|10|10|12	0	0	0	0	0	-29.34	0.08	0.89
TLK2-529	Q15149	PLEC	1|0|0|0|0|0	1	0.17	6	1|0|0|0|0|0|0|0|0|2|2|2|0|0|0|0|0|1|10|13|15|2|2|2|1|1|6|4|2|2|2|5|3|0|0|1|0|0|0|2|0|1|1|0|0	0	0	0	0	0	-9.66	0.09	0.89
TLK2-529	Q15181	PPA1	2|2|2|1|0|1	8	1.33	6	1|3|2|14|15|17|0|0|0|2|4|2|4|4|5|13|13|12|16|16|14|17|13|16|3|0|0|0|3|3|3|4|4|6|3|2|4|2|1|3|0|1|8|8|6	0	0	0	0	0	-27.17	0.22	0.89
TLK2-529	Q15208	STK38	7|8|8|11|11|12	57	9.5	6	2|3|0|11|16|19|0|0|0|4|8|9|0|0|0|9|7|6|0|0|0|4|5|6|8|0|0|0|7|7|8|10|10|4|6|3|4|4|4|1|0|4|3|6|8	0.01	0.03	0.01	0.03	0.01	-8.44	2.08	0.8
TLK2-529	Q15233	NONO	44|49|47|80|57|55	332	55.33	6	14|21|15|105|104|105|39|133|81|260|337|316|27|31|29|107|108|112|36|41|42|87|94|87|134|33|38|32|126|142|131|125|114|47|58|61|48|47|50|287|251|244|25|26|33	0	0	0	0	0	-297.58	0.57	0.89
TLK2-529	Q15287	RNPS1	13|9|7|10|9|8	56	9.33	6	3|4|3|3|5|5|1|3|2|4|7|5|3|1|1|3|4|6|2|2|3|4|6|5|7|4|3|3|6|8|5|5|5|3|2|5|3|4|3|4|3|7|1|1|2	0.16	0.8	0.16	0.8	0.16	-6.12	2.49	0.55
TLK2-529	Q15291	RBBP5	2|0|3|4|3|3	15	2.5	6	2|2|1|2|1|1|1|2|1|2|2|3|0|0|0|0|0|0|1|1|1|1|2|2|5|2|2|2|6|4|4|3|4|1|0|1|0|0|0|1|1|1|0|0|0	0.03	0.08	0.03	0.08	0.03	-8.3	1.73	0.75
TLK2-529	Q15329	E2F5	2|0|0|0|1|1	4	0.67	6	0|0|0|0|0|0|0|0|0|0|0|0|0|0|0|1|1|1|0|0|0|1|1|2|2|0|0|0|0|3|0|1|1|0|0|0|0|0|0|0|0|0|0|0|0	0.05	0.27	0.05	0.27	0.05	-4.12	2.14	0.72
TLK2-529	Q15345	LRRC41	1|1|0|0|0|0	2	0.33	6	0|0|0|0|0|0|0|0|0|1|1|2|0|0|0|0|0|0|1|1|0|1|1|1|3|0|0|0|2|1|0|0|1|1|0|1|0|1|1|1|1|1|0|0|0	0	0	0	0	0	-4.82	0.65	0.89
TLK2-529	Q15349 Q86UE8 Q86UE8-2 Q86UE8-297 Q86UE8-529 Q86UE8-55 Q9UKI8 Q9UKI8-479 Q9UKI8-5 Q9UKI8-566	TLK1-TLK2	12|8|5|0|2|4	31	5.17	6	1|0|0|0|0|0|0|0|0|1|0|1|0|0|0|1|0|1|0|0|0|1|1|1|1|0|0|0|1|0|0|0|0|1|1|1|0|1|0|0|1|0|1|1|1	0.65	1	0.65	1	0.65	-4.42	12.92	0.15
TLK2-529	Q15365	PCBP1	3|5|6|10|9|8	41	6.83	6	1|3|2|18|20|19|4|6|5|37|42|48|5|7|6|43|39|33|10|8|10|28|27|27|33|7|6|9|28|30|28|28|27|8|9|11|14|13|12|30|30|42|11|14|11	0	0	0	0	0	-73.19	0.36	0.89
TLK2-529	Q15366	PCBP2	18|19|22|7|13|14	93	15.5	6	3|1|1|13|16|15|1|4|3|34|38|37|4|3|4|26|20|20|10|13|12|23|22|21|24|3|5|5|30|33|21|22|20|9|8|10|7|6|4|20|23|23|11|11|14	0	0	0	0	0	-44.96	1.07	0.89
TLK2-529	Q15369	ELOC	3|3|2|4|4|4	20	3.33	6	0|0|0|4|2|5|0|0|0|4|5|6|0|0|0|0|0|0|2|3|2|3|2|2|3|0|0|0|4|3|3|3|3|3|5|2|3|4|4|1|1|2|1|1|0	0.01	0.02	0.01	0.02	0.01	-6.58	1.74	0.79
TLK2-529	Q15370	ELOB	2|5|5|1|3|3	19	3.17	6	0|0|0|4|5|3|0|0|0|1|4|4|0|0|0|3|2|1|2|3|3|3|2|3|6|0|0|0|5|6|5|5|5|4|4|3|3|3|3|4|4|3|2|4|4	0	0.01	0	0.01	0	-10.74	1.23	0.83
TLK2-529	Q15382	RHEB	2|2|2|2|4|2	14	2.33	6	0|1|1|4|4|7|0|0|0|1|1|1|0|0|0|1|0|0|2|3|3|2|1|1|1|0|0|0|0|1|0|0|0|4|4|6|4|2|2|2|0|0|5|5|6	0.01	0.05	0.01	0.05	0.01	-5.5	1.4	0.79
TLK2-529	Q15393	SF3B3	42|37|35|46|43|38	241	40.17	6	9|7|6|26|28|29|7|10|14|25|41|42|0|2|1|8|9|7|19|22|22|28|27|24|36|14|14|18|34|36|26|31|31|33|27|24|20|21|20|31|35|33|14|18|19	0	0	0	0	0	-28.43	1.91	0.89
TLK2-529	Q15398	DLGAP5	2|5|2|2|1|2	14	2.33	6	1|0|1|7|10|8|0|0|0|1|2|3|0|0|0|0|1|0|0|0|0|3|3|1|3|0|0|0|0|3|1|2|3|7|5|4|6|4|4|2|3|1|0|0|3	0.01	0.05	0.01	0.05	0.01	-8.21	1.14	0.8
TLK2-529	Q15417	CNN3	34|37|40|21|21|23	176	29.33	6	3|1|1|67|84|71|1|6|5|71|60|67|12|10|9|54|55|58|11|12|12|48|47|46|49|3|4|3|48|48|42|35|37|26|41|38|31|39|38|80|88|77|28|28|32	0	0	0	0	0	-101.72	0.81	0.89
TLK2-529	Q15418	RPS6KA1	1|0|0|0|0|0	1	0.17	6	0|0|0|1|3|2|0|0|0|5|10|12|0|0|0|7|6|8|0|0|0|9|7|7|17|0|0|0|17|15|10|13|14|9|2|1|0|1|1|7|4|6|8|7|10	0	0	0	0	0	-22.47	0.03	0.89
TLK2-529	Q15424	SAFB	1|0|0|2|2|0	5	0.83	6	1|1|2|2|1|1|2|1|1|1|4|3|0|0|0|5|5|3|7|7|8|4|6|6|4|0|1|1|4|3|7|5|6|1|1|2|1|2|1|1|1|1|0|1|0	0	0	0	0	0	-12.74	0.33	0.89
TLK2-529	Q15427	SF3B4	7|8|6|6|4|5	36	6	6	1|1|1|3|6|5|1|1|1|5|8|9|1|1|0|0|1|2|1|0|1|5|3|4|6|0|0|0|6|6|7|10|8|2|2|2|1|1|1|5|6|6|1|2|2	0.02	0.05	0.02	0.05	0.02	-7.28	2	0.78
TLK2-529	Q15428	SF3A2	5|6|5|8|7|7	38	6.33	6	0|0|0|1|0|2|0|0|0|3|6|9|3|4|3|6|5|4|4|4|0|8|7|6|9|3|1|0|8|7|10|8|7|5|1|1|1|0|0|1|3|2|3|2|2	0.01	0.02	0.01	0.02	0.01	-6.97	1.91	0.8
TLK2-529	Q15435	PPP1R7	5|5|3|2|4|3	22	3.67	6	1|0|0|7|5|5|0|0|0|5|8|8|1|0|0|7|8|6|2|0|0|4|4|7|7|0|0|0|7|8|6|4|5|4|5|2|4|5|5|4|6|5|2|3|5	0	0	0	0	0	-12.9	1	0.87
TLK2-529	Q15437	SEC23B	1|0|2|1|0|1	5	0.83	6	0|0|0|1|3|1|0|0|0|9|9|15|0|0|0|0|0|0|2|2|3|6|6|4|18|0|0|0|16|18|7|21|17|1|5|2|3|2|4|5|8|10|2|4|5	0	0	0	0	0	-21.33	0.18	0.89
TLK2-529	Q15459	SF3A1	56|44|44|25|44|39	252	42	6	6|8|8|21|21|19|4|6|6|22|24|26|10|13|11|24|24|17|23|18|17|27|26|27|24|13|9|11|25|30|25|22|24|23|17|18|12|26|25|34|29|25|17|16|18	0	0.02	0	0.02	0	-33.31	2.22	0.83
TLK2-529	Q15528	MED22	3|5|3|3|1|2	17	2.83	6	0|0|0|0|0|0|0|0|0|1|0|1|0|0|0|0|0|0|0|0|0|3|3|3|1|0|0|0|1|1|1|1|1|2|1|0|0|1|0|0|0|0|0|0|0	0.34	0.83	0.34	0.83	0.34	-2.9	6.07	0.38
TLK2-529	Q15545	TAF7	9|5|4|8|8|10	44	7.33	6	1|1|1|9|5|9|0|0|0|0|2|0|0|0|0|3|6|3|0|0|0|2|2|1|1|0|0|0|1|2|1|2|1|2|2|2|4|2|2|2|2|2|2|4|2	0.35	0.64	0.35	0.64	0.35	-3.37	4.07	0.37
TLK2-529	Q15555	MAPRE2	1|3|3|1|5|3	16	2.67	6	1|1|0|3|5|4|0|0|0|2|2|2|0|0|0|1|0|0|0|0|0|1|1|2|2|0|0|0|4|3|2|2|2|3|2|3|1|2|0|2|2|2|1|1|2	0.07	0.29	0.07	0.29	0.07	-6.25	1.97	0.69
TLK2-529	Q15596	NCOA2	6|9|7|10|8|9	49	8.17	6	0|1|0|2|2|2|0|0|0|1|5|7|1|0|1|6|5|6|0|0|0|4|5|6|8|0|1|1|9|7|7|2|6|4|4|2|1|3|3|0|2|3|1|4|3	0.13	0.3	0.13	0.3	0.13	-4.18	2.94	0.58
TLK2-529	Q15631	TSN	15|11|7|5|5|8	51	8.5	6	1|2|1|20|17|18|1|0|1|15|18|16|0|0|0|1|0|1|0|0|0|11|9|11|14|0|0|0|14|13|14|12|14|5|7|8|6|11|13|14|12|16|12|13|16	0	0	0	0	0	-23.31	1.07	0.88
TLK2-529	Q15637	SF1	22|27|29|29|23|21	151	25.17	6	1|1|0|39|39|34|0|1|1|20|34|32|4|3|3|38|37|42|4|7|5|31|33|30|27|0|2|2|26|23|21|19|22|9|13|16|8|10|8|15|23|22|13|18|20	0	0	0	0	0	-30.85	1.5	0.89
TLK2-529	Q15645	TRIP13	2|2|3|2|1|1	11	1.83	6	0|0|0|3|3|3|0|0|0|1|3|4|0|0|0|1|1|3|7|7|6|5|6|6|1|1|0|1|2|4|5|3|4|6|3|3|1|2|2|3|2|3|5|4|5	0	0	0	0	0	-10.93	0.69	0.87
TLK2-529	Q15648	MED1	11|16|14|12|20|14	87	14.5	6	1|1|2|15|14|15|0|1|0|3|18|18|4|4|3|27|20|21|2|2|1|13|9|11|14|1|4|4|16|22|19|19|15|4|6|4|1|1|1|3|5|2|1|4|3	0	0	0	0	0	-14.03	1.84	0.85
TLK2-529	Q15652	JMJD1C	10|18|14|18|22|22	104	17.33	6	2|3|4|3|4|3|0|0|0|1|4|3|0|0|0|4|3|5|0|0|0|3|3|6|2|0|0|0|1|2|2|2|2|3|4|5|4|5|2|2|2|3|1|4|2	0.98	1	0.98	1	0.98	1.91	7.88	0.01
TLK2-529	Q15691	MAPRE1	7|5|5|1|3|4	25	4.17	6	1|2|1|8|12|11|0|0|0|17|18|20|1|0|1|15|13|16|3|3|4|20|19|17|15|0|0|1|17|16|14|14|13|9|11|12|10|10|10|11|12|14|10|9|10	0	0	0	0	0	-38.57	0.45	0.89
TLK2-529	Q15697	ZNF174	2|0|0|1|1|1	5	0.83	6	0|0|0|0|0|0|0|0|0|0|0|0|0|0|0|0|0|0|0|0|0|0|0|0|0|0|0|0|0|0|1|1|0|0|0|1|0|0|0|0|0|0|0|0|0	0.13	0.77	0.13	0.77	0.13	-3.34	8.33	0.59
TLK2-529	Q15717	ELAVL1	4|5|6|5|5|6	31	5.17	6	1|1|1|3|4|3|0|2|2|4|8|8|0|0|0|1|2|1|6|6|6|4|3|4|5|1|2|1|6|5|4|4|4|2|2|2|2|2|2|7|6|8|1|1|0	0	0.01	0	0.01	0	-7.63	1.7	0.83
TLK2-529	Q15723	ELF2	6|3|5|10|7|10	41	6.83	6	0|0|0|1|2|2|0|0|0|0|1|1|0|0|0|2|2|1|0|0|0|0|0|0|2|0|0|0|2|1|2|2|1|4|3|2|0|3|2|0|0|0|0|1|1	0.75	1	0.75	1	0.75	-1.73	8.09	0.09
TLK2-529	Q15738	NSDHL	1|1|0|0|0|0	2	0.33	6	0|0|0|4|3|2|0|0|0|0|0|0|0|0|0|0|0|0|4|3|3|3|2|2|0|0|0|0|0|0|0|0|0|1|3|0|0|0|1|0|0|0|0|1|1	0	0	0	0	0	-5.78	0.45	0.89
TLK2-529	Q15742	NAB2	1|0|1|2|2|2	8	1.33	6	0|0|0|0|0|0|0|0|0|0|1|2|0|0|0|5|4|7|0|0|0|2|1|2|4|0|0|0|4|4|1|2|3|1|1|0|0|0|0|1|1|0|0|0|0	0.02	0.04	0.02	0.04	0.02	-6.09	1.3	0.77
TLK2-529	Q15746	MYLK	1|1|0|1|1|1	5	0.83	6	0|0|0|0|1|0|0|0|0|1|1|1|0|0|0|2|2|2|1|1|1|1|1|1|1|0|0|0|1|1|0|0|0|0|1|1|1|1|0|1|0|0|1|1|1	0	0	0	0	0	-5.14	1.39	0.89
TLK2-529	Q15750	TAB1	4|1|3|1|1|2	12	2	6	1|2|1|4|7|5|0|0|0|7|16|19|0|0|0|10|9|8|2|2|2|15|9|11|12|0|2|1|12|12|6|5|9|7|6|2|3|3|5|9|11|12|8|10|7	0	0	0	0	0	-24.46	0.33	0.89
TLK2-529	Q15758	SLC1A5	1|2|3|2|2|2	12	2	6	0|2|1|5|4|5|1|1|1|3|3|2|2|3|3|4|4|4|2|2|1|3|5|5|3|2|2|3|4|3|4|2|2|5|7|4|4|4|4|2|4|2|1|2|5	0	0	0	0	0	-12.38	0.67	0.89
TLK2-529	Q15785	TOMM34	2|1|0|1|0|1	5	0.83	6	0|0|0|1|2|3|0|0|0|1|1|1|0|0|0|2|2|2|0|0|0|2|4|3|5|0|0|0|5|6|1|1|2|4|6|2|2|3|2|2|1|4|3|2|2	0	0	0	0	0	-9.4	0.49	0.85
TLK2-529	Q15813	TBCE	2|2|3|3|1|5	16	2.67	6	0|0|0|18|15|18|0|0|0|16|15|19|0|0|0|15|13|16|3|3|2|16|19|15|17|0|0|0|16|19|17|23|23|4|2|4|9|9|7|13|14|11|11|12|11	0	0	0	0	0	-38.92	0.28	0.89
TLK2-529	Q15843	NEDD8	3|3|4|1|2|1	14	2.33	6	0|0|0|1|3|2|1|0|1|5|7|8|1|2|1|1|1|1|0|0|0|3|0|0|2|1|0|0|2|1|1|1|1|3|2|5|1|1|1|3|2|2|1|0|2	0.02	0.06	0.02	0.06	0.02	-6.83	1.5	0.77
TLK2-529	Q15911	ZFHX3	3|3|2|0|1|1	10	1.67	6	0|0|0|0|0|0|0|0|0|0|0|0|0|0|0|0|0|0|0|0|0|1|0|0|0|0|0|0|1|1|1|0|0|1|0|1|0|1|1|0|0|0|0|0|0	0.38	0.86	0.38	0.86	0.38	-3.62	9.38	0.35
TLK2-529	Q15928	ZNF141	1|0|2|1|2|3	9	1.5	6	0|0|0|1|2|0|0|0|0|0|0|0|0|0|0|0|0|0|0|0|0|0|0|0|0|0|0|0|0|0|0|0|0|0|2|0|0|0|0|0|0|0|0|0|0	0.38	0.88	0.38	0.88	0.38	-3.4	13.5	0.35
TLK2-529	Q15942	ZYX	6|10|10|3|4|3	36	6	6	3|3|3|26|29|25|0|2|3|17|28|23|5|6|3|33|30|28|1|3|3|21|25|23|21|1|3|0|22|24|20|23|19|18|17|22|20|16|22|17|18|17|9|18|18	0	0	0	0	0	-57.96	0.39	0.89
TLK2-529	Q16181	SEPTIN7	4|6|6|6|5|5	32	5.33	6	11|9|5|21|24|21|3|2|1|11|18|17|1|1|0|4|4|4|3|3|3|9|10|12|15|3|7|6|17|16|10|10|11|11|16|17|12|16|14|11|12|14|10|10|10	0	0	0	0	0	-33.19	0.54	0.89
TLK2-529	Q16204	CCDC6	4|3|3|6|6|5	27	4.5	6	1|0|0|11|15|14|0|2|0|9|11|10|0|0|0|13|10|10|0|2|0|11|11|11|13|1|0|1|11|11|12|11|11|4|5|3|4|5|4|10|11|7|6|5|5	0	0	0	0	0	-20.64	0.72	0.89
TLK2-529	Q16342	PDCD2	1|0|1|0|0|0	2	0.33	6	0|0|0|3|3|3|0|0|0|0|0|0|0|0|0|0|0|0|0|0|0|1|1|1|1|0|0|0|1|1|1|1|1|1|1|0|0|0|0|0|0|0|0|0|0	0	0	0	0	0	-4.62	0.75	0.89
TLK2-529	Q16513	PKN2	2|3|3|4|2|3	17	2.83	6	2|1|0|17|13|15|0|0|0|13|22|22|2|1|2|20|21|18|5|5|5|5|7|5|21|0|1|0|20|20|16|19|19|13|10|11|7|6|8|13|13|16|11|18|14	0	0	0	0	0	-38.99	0.28	0.89
TLK2-529	Q16527	CSRP2	1|2|1|1|5|4	14	2.33	6	0|0|1|5|4|7|1|1|2|1|5|5|5|5|2|4|5|2|3|3|2|5|3|6|5|4|2|2|10|7|2|4|3|6|4|3|3|1|2|5|7|5|5|8|4	0	0	0	0	0	-15.49	0.62	0.87
TLK2-529	Q16531	DDB1	18|20|18|15|17|16	104	17.33	6	0|0|0|6|7|8|1|3|2|14|17|17|1|0|0|2|4|2|6|8|6|10|9|10|15|0|2|4|12|15|14|15|15|10|8|2|8|5|6|10|11|11|5|5|8	0.01	0.03	0.01	0.03	0.01	-7.34	2.48	0.8
TLK2-529	Q16533	SNAPC1	1|1|1|0|0|0	3	0.5	6	0|0|0|0|0|0|0|0|0|0|0|0|0|0|0|0|0|0|0|0|0|0|0|0|0|0|0|0|0|0|0|0|0|0|0|0|0|0|0|0|0|0|0|0|0	0	0	0	0	0	-3.34	5	0.89
TLK2-529	Q16543	CDC37	5|3|3|4|3|3	21	3.5	6	0|0|0|8|8|9|0|0|0|4|5|4|1|0|0|8|7|9|1|2|1|5|4|5|6|0|0|0|6|6|5|5|5|7|6|5|6|5|5|6|7|7|3|7|5	0	0	0	0	0	-12.61	0.86	0.87
TLK2-529	Q16555	DPYSL2	9|7|8|8|6|8	46	7.67	6	1|1|1|18|18|18|0|0|0|10|19|20|2|2|1|24|24|22|2|2|3|16|13|15|21|0|1|1|21|20|16|16|14|18|12|15|14|14|13|14|18|19|18|19|21	0	0	0	0	0	-36.95	0.64	0.89
TLK2-529	Q16576	RBBP7	6|8|7|8|7|6	42	7	6	1|2|1|8|7|6|1|2|2|10|12|12|1|0|0|11|13|14|5|4|4|13|8|9|20|3|5|4|19|19|16|14|11|4|2|2|3|3|2|9|9|12|6|5|5	0	0	0	0	0	-18.57	0.99	0.88
TLK2-529	Q16600	ZNF239	1|0|0|0|0|0	1	0.17	6	1|0|0|1|1|1|0|0|0|0|0|0|0|0|0|1|1|0|0|0|0|0|0|0|1|0|0|0|2|0|1|1|0|1|1|1|0|1|0|1|1|1|0|0|0	0	0	0	0	0	-4.42	0.42	0.89
TLK2-529	Q16629	SRSF7	2|4|3|2|2|2	15	2.5	6	1|1|1|3|2|2|2|2|2|2|3|3|0|0|0|1|1|1|5|4|5|3|2|2|1|0|1|0|2|2|2|2|3|2|3|2|4|5|3|1|2|2|1|1|1	0	0.02	0	0.02	0	-6.89	1.28	0.82
TLK2-529	Q16630	CPSF6	26|28|25|27|36|30	172	28.67	6	4|3|3|10|10|12|0|0|0|10|17|19|1|2|1|16|16|18|3|3|3|11|11|11|16|0|1|1|15|15|12|10|7|11|11|14|15|17|17|8|7|10|9|8|11	0.2	0.8	0.2	0.8	0.2	-4.21	3.23	0.51
TLK2-529	Q16637	SMN1; SMN2	1|2|1|1|1|0	6	1	6	0|0|0|1|3|2|1|1|2|1|1|2|2|3|2|3|2|3|2|2|1|0|0|1|1|1|1|2|1|0|1|1|1|1|1|0|1|1|1|2|1|1|0|2|1	0	0.01	0	0.01	0	-7.47	0.8	0.83
TLK2-529	Q16777	H2AC20	34|40|41|62|60|73	310	51.67	6	5|6|2|2|2|2|10|13|10|25|46|39|4|3|4|1|1|1|22|17|26|5|5|5|64|5|6|6|47|56|8|6|7|30|22|22|18|18|20|67|73|71|7|9|7	0.05	0.27	0.05	0.27	0.05	-21.15	2.82	0.71
TLK2-529	Q16778	H2BC21	2|6|2|1|0|2	13	2.17	6	0|0|0|1|0|0|1|3|1|2|4|4|0|0|0|0|0|0|3|3|3|1|0|0|2|0|1|2|3|2|4|2|4|2|3|2|2|2|2|2|4|3|2|1|2	0.07	0.42	0.07	0.42	0.07	-9.11	1.34	0.68
TLK2-529	Q16878	CDO1	2|2|1|0|0|0	5	0.83	6	0|0|0|0|0|0|0|0|0|0|0|1|0|0|0|0|0|0|1|0|0|0|1|0|0|0|0|0|0|1|0|0|0|1|0|1|0|0|0|0|1|0|0|1|2	0.15	0.46	0.15	0.46	0.15	-3.76	3.75	0.56
TLK2-529	Q1ED39	KNOP1	4|4|4|2|3|3	20	3.33	6	0|0|0|0|0|0|0|0|0|2|3|7|0|0|0|1|1|1|0|0|0|1|1|1|5|0|0|0|6|8|3|3|5|4|3|0|1|3|1|1|5|3|0|0|0	0.05	0.07	0.05	0.07	0.05	-4.89	2.17	0.71
TLK2-529	Q1KMD3	HNRNPUL2	3|2|3|1|2|1	12	2	6	0|0|0|2|2|1|0|0|0|0|0|0|0|0|0|0|0|0|12|14|14|0|0|0|0|0|0|0|0|0|0|0|0|3|4|4|1|2|3|0|1|1|0|0|1	0.03	0.06	0.03	0.06	0.03	-5.88	1.38	0.75
TLK2-529	Q29RF7	PDS5A	11|7|11|12|9|11	61	10.17	6	1|0|0|8|11|12|0|0|0|7|10|12|0|1|1|12|14|13|8|8|7|10|11|10|17|1|1|2|14|15|14|12|12|8|6|7|5|7|8|11|12|11|7|7|6	0	0	0	0	0	-18.85	1.35	0.88
TLK2-529	Q2KHR3	QSER1	12|11|8|14|14|16	75	12.5	6	3|1|1|4|4|4|0|2|1|8|15|10|5|4|4|13|18|13|0|1|0|9|6|10|9|2|3|3|16|10|8|7|9|3|3|1|4|5|3|7|5|7|5|5|3	0.01	0.04	0.01	0.04	0.01	-10.81	2.21	0.79
TLK2-529	Q2M2I8	AAK1	3|1|1|0|0|0	5	0.83	6	3|3|2|13|18|18|0|0|0|6|6|8|1|1|1|12|17|18|0|0|0|3|3|5|18|0|1|1|15|13|8|8|7|14|14|9|12|9|8|7|5|5|5|7|5	0	0	0	0	0	-31.31	0.12	0.89
TLK2-529	Q2NL82	TSR1	3|4|3|3|3|3	19	3.17	6	0|0|0|8|8|7|0|0|0|1|1|2|0|0|0|2|2|1|4|3|3|4|4|3|7|0|1|1|7|4|2|1|1|4|3|2|1|0|1|1|1|2|4|3|1	0	0.01	0	0.01	0	-6.02	1.42	0.82
TLK2-529	Q2TAL8	QRICH1	2|1|2|4|4|5	18	3	6	1|0|0|2|1|3|0|0|0|1|3|5|0|0|0|4|3|4|2|2|2|2|2|2|3|0|0|0|2|4|1|2|2|1|1|2|2|2|2|2|3|4|2|2|3	0.03	0.13	0.03	0.13	0.03	-7.72	1.71	0.74
TLK2-529	Q2TAY7	SMU1	7|7|8|6|10|10	48	8	6	0|0|0|0|0|0|0|0|0|1|1|1|0|0|0|0|0|0|3|3|3|0|0|0|3|1|0|1|1|1|1|2|1|1|0|0|0|0|0|0|0|0|0|0|0	0.96	1	0.96	1	0.96	2.13	15	0.01
TLK2-529	Q2TBE0	CWF19L2	7|9|10|7|13|12	58	9.67	6	0|0|0|0|3|3|0|1|0|3|8|5|0|0|0|11|7|9|0|0|0|3|1|1|8|0|0|1|4|6|3|6|5|2|1|2|1|1|1|1|3|2|1|0|2	0.35	0.64	0.35	0.64	0.35	-2.08	4.14	0.37
TLK2-529	Q2VWP7	PRTG	2|2|1|7|2|2	16	2.67	6	0|0|0|0|0|0|0|0|0|1|5|1|0|1|0|1|0|1|1|0|2|3|1|2|1|0|0|0|2|1|1|1|2|0|0|1|0|0|0|5|5|3|1|1|1	0.15	0.72	0.15	0.72	0.15	-4.68	2.73	0.57
TLK2-529	Q2YD98	UVSSA	1|0|1|0|1|1	4	0.67	6	0|0|0|0|0|0|0|0|0|0|0|0|0|0|0|0|0|0|0|0|0|0|0|0|0|0|0|0|0|0|0|0|0|0|0|0|1|1|1|0|1|0|1|1|1	0	0	0	0	0	-3.54	4.29	0.89
TLK2-529	Q32MZ4	LRRFIP1	1|2|3|0|0|0	6	1	6	3|4|3|8|7|10|0|1|0|2|3|3|1|1|0|2|4|3|2|2|1|4|4|2|7|2|0|1|6|5|2|4|4|4|6|6|2|3|2|1|3|3|0|4|6	0	0	0	0	0	-15.33	0.32	0.89
TLK2-529	Q32P41	TRMT5	3|4|5|2|2|2	18	3	6	0|0|0|5|7|4|0|0|0|0|0|0|0|0|0|0|0|0|0|0|0|0|0|0|0|0|0|0|0|0|0|0|0|8|6|5|3|3|4|0|0|0|9|9|8	0.05	0.16	0.05	0.16	0.05	-4.74	1.9	0.71
TLK2-529	Q3B7T1	EDRF1	1|0|0|0|0|0	1	0.17	6	0|0|0|0|0|0|0|0|0|0|0|1|0|0|0|0|0|0|0|0|0|0|0|0|0|0|0|0|1|0|1|1|1|0|1|1|0|0|0|0|0|0|0|0|0	0	0	0	0	0	-3.54	1.07	0.89
TLK2-529	Q3KQU3	MAP7D1	1|1|2|2|2|2	10	1.67	6	0|0|0|2|1|0|0|0|0|1|0|0|0|0|0|0|0|0|2|1|1|1|0|0|0|1|0|0|1|3|1|1|1|0|2|1|5|0|2|0|1|1|1|1|1	0.05	0.08	0.05	0.08	0.05	-3.86	2.34	0.71
TLK2-529	Q3LXA3	TKFC	1|0|0|0|2|2	5	0.83	6	0|0|0|0|0|0|0|0|0|0|0|0|0|0|0|0|0|0|0|0|1|0|0|0|1|0|0|0|0|1|0|0|0|1|0|2|2|1|1|1|1|1|1|1|0	0.08	0.25	0.08	0.25	0.08	-4.18	2.5	0.66
TLK2-529	Q3MHD2	LSM12	1|2|1|0|0|1	5	0.83	6	3|2|2|5|5|5|2|2|2|4|3|4|0|0|0|2|1|2|2|2|2|2|2|3|4|1|1|1|4|5|3|3|3|3|4|4|4|5|6|2|2|3|1|2|2	0	0	0	0	0	-13.52	0.31	0.89
TLK2-529	Q3T8J9	GON4L	1|2|2|0|2|2	9	1.5	6	0|0|0|0|0|0|0|0|0|0|0|1|0|0|0|0|0|0|0|0|0|0|0|0|0|0|0|0|0|0|0|0|0|0|0|0|0|1|0|0|0|0|0|0|0	0.51	0.77	0.51	0.77	0.51	-3.34	15	0.23
TLK2-529	Q3YEC7	RABL6	3|3|4|0|0|0	10	1.67	6	5|6|3|13|15|14|0|0|0|7|9|8|0|0|1|6|7|7|0|2|4|5|6|6|9|0|1|0|7|8|6|8|9|9|12|7|6|8|5|7|5|4|9|9|7	0	0	0	0	0	-26.78	0.29	0.89
TLK2-529	Q3ZCM7	TUBB8	1|0|0|0|0|0	1	0.17	6	0|0|0|0|0|0|0|0|0|0|0|0|0|0|0|0|0|0|0|1|0|0|0|0|0|0|0|0|0|0|0|0|0|0|0|0|0|0|0|0|0|0|0|0|0	0	0	0	0	0	-3.34	1.67	0.89
TLK2-529	Q3ZCQ8	TIMM50	6|6|8|3|2|3	28	4.67	6	1|1|2|4|3|2|0|2|3|0|5|3|1|3|3|0|0|0|5|5|5|3|2|2|2|2|1|4|1|3|1|2|3|2|0|3|2|3|1|2|3|1|2|3|3	0.12	0.54	0.12	0.54	0.12	-7.76	2.12	0.61
TLK2-529	Q4G0J3	LARP7	8|9|6|15|10|9	57	9.5	6	0|0|2|5|7|7|0|0|0|1|5|2|0|0|0|3|3|3|1|1|0|7|10|6|7|0|0|0|7|6|7|7|2|6|7|6|9|3|4|4|3|1|0|3|2	0.16	0.69	0.16	0.69	0.16	-5.63	2.91	0.55
TLK2-529	Q4KMP7	TBC1D10B	1|0|0|0|1|1	3	0.5	6	0|0|0|0|1|1|0|0|0|1|2|2|2|1|1|7|9|6|1|0|0|1|2|1|6|0|0|0|2|7|3|4|4|2|2|1|2|1|0|2|1|2|1|0|0	0	0	0	0	0	-9.38	0.29	0.89
TLK2-529	Q4L235	AASDH	2|2|3|2|3|4	16	2.67	6	0|0|0|1|1|1|0|0|0|1|2|3|0|0|0|2|1|3|0|0|0|0|3|1|1|0|0|0|2|1|1|1|0|1|0|0|1|0|1|0|0|0|1|0|1	0.22	0.57	0.22	0.57	0.22	-2.41	4	0.5
TLK2-529	Q4LE39	ARID4B	2|1|1|1|1|2	8	1.33	6	0|0|1|0|0|0|0|0|0|0|0|1|0|0|0|0|1|1|0|0|0|0|1|2|0|0|1|0|0|1|1|1|1|0|0|1|0|0|0|0|1|1|0|0|0	0.08	0.25	0.08	0.25	0.08	-2.57	4	0.66
TLK2-529	Q4VC05	BCL7A	3|0|0|2|3|5	13	2.17	6	0|0|0|0|0|0|0|0|0|0|0|0|0|0|0|0|0|0|0|0|0|2|2|1|0|0|0|0|0|0|0|0|0|1|1|0|2|0|0|0|0|0|0|0|0	0.46	0.96	0.46	0.96	0.46	-3.72	10.83	0.27
TLK2-529	Q4VC44	FLYWCH1	1|0|1|1|0|0	3	0.5	6	0|0|0|0|0|0|0|0|0|0|0|0|0|0|0|0|0|0|0|0|1|0|0|0|0|0|0|0|0|0|0|0|0|1|0|0|0|0|0|0|0|0|0|0|0	0	0	0	0	0	-3.34	5	0.89
TLK2-529	Q52LA3	LIN52	2|2|3|1|0|1	9	1.5	6	0|0|0|0|0|0|0|0|0|0|0|0|0|0|0|0|0|0|0|0|0|0|0|0|0|0|0|0|0|0|0|0|0|0|0|0|0|0|0|0|0|0|0|0|0	0.42	0.95	0.42	0.95	0.42	-3.34	15	0.31
TLK2-529	Q52LJ0	FAM98B	8|6|7|4|2|6	33	5.5	6	0|1|1|6|7|5|0|0|0|3|4|7|0|1|0|3|4|3|4|5|3|4|5|4|8|0|0|0|4|5|6|5|6|2|2|1|3|2|2|4|3|3|3|5|4	0.01	0.05	0.01	0.05	0.01	-10.68	1.79	0.78
TLK2-529	Q53EL6	PDCD4	1|0|2|2|1|3	9	1.5	6	0|0|0|4|2|2|0|0|0|3|2|1|0|0|0|2|3|3|0|0|0|3|2|5|6|0|0|0|4|5|3|3|5|1|0|1|1|1|0|3|2|3|3|4|9	0	0.01	0	0.01	0	-10.22	0.78	0.84
TLK2-529	Q53F19	NCBP3	1|0|0|0|1|1	3	0.5	6	0|0|0|1|0|1|0|0|0|0|0|1|0|0|0|0|0|0|1|2|3|1|0|0|1|0|0|0|0|2|2|1|1|1|1|0|0|0|0|0|1|1|0|0|0	0	0	0	0	0	-4.64	1.07	0.89
TLK2-529	Q53GG5	PDLIM3	3|2|3|9|6|6	29	4.83	6	0|0|0|7|12|7|0|0|0|6|8|10|0|0|0|11|16|13|0|0|0|9|8|10|9|1|1|1|7|10|10|6|7|5|4|9|15|8|13|10|4|4|3|4|3	0	0	0	0	0	-20.12	0.87	0.87
TLK2-529	Q53GQ0	HSD17B12	2|1|2|2|1|2	10	1.67	6	0|0|0|0|1|0|0|1|0|0|0|1|2|2|2|0|0|0|7|8|8|2|1|1|3|1|1|0|3|2|1|1|3|1|0|1|1|1|2|1|0|0|2|3|3	0.01	0.01	0.01	0.01	0.01	-6.41	1.14	0.81
TLK2-529	Q53GS9	USP39	7|10|9|10|9|11	56	9.33	6	0|0|0|3|2|6|0|0|0|7|8|8|0|0|0|2|3|2|5|5|6|4|4|3|6|0|0|0|5|8|4|4|5|5|3|2|4|4|2|4|3|2|1|1|1	0.21	0.43	0.21	0.43	0.21	-3.62	3.18	0.5
TLK2-529	Q562F6	SGO2	1|0|0|0|1|0	2	0.33	6	0|0|0|0|0|0|0|0|0|0|0|0|0|0|0|0|0|0|0|0|0|0|0|0|0|0|0|0|0|0|0|0|0|0|0|0|0|0|0|0|0|0|0|0|0	0	0	0	0	0	-3.34	3.33	0.89
TLK2-529	Q562R1	ACTBL2	1|0|0|1|0|0	2	0.33	6	1|0|0|3|2|2|0|2|2|0|1|1|0|0|0|0|0|0|2|2|2|1|1|1|0|0|1|0|1|0|1|1|0|0|3|5|4|2|1|1|1|0|1|0|1	0	0	0	0	0	-6.45	0.33	0.89
TLK2-529	Q56VL3	OCIAD2	1|1|0|0|0|1	3	0.5	6	0|0|0|0|0|0|0|0|0|0|0|0|1|1|0|0|0|0|0|0|0|0|0|0|0|0|0|0|0|0|0|0|0|0|0|0|0|0|0|0|0|0|1|2|1	0	0	0	0	0	-3.46	3.75	0.89
TLK2-529	Q58FF8	HSP90AB2P	4|6|4|2|2|2	20	3.33	6	0|0|0|0|0|1|0|0|0|3|3|3|0|1|0|3|2|1|1|5|6|2|1|0|2|0|0|0|4|2|4|4|5|0|0|0|0|0|0|2|2|1|2|2|2	0.09	0.33	0.09	0.33	0.09	-4.74	2.34	0.65
[truncated: 9,490 more rows]

## Sheet: 3. Categories for comparison
Nascent fork enriched			SFARI gene			DECIPHER
doi: 10.1016/j.celrep.2019.08.051.			https://gene.sfari.org/			https://decipher.sanger.ac.uk/
[truncated: 2,013 more rows]
